# Supplementary material
Source: Research Square preprint supplement (doi:10.21203/rs.3.rs-9861700/v1)
Supplement: Supplementary file 1 [file 75b09b1cf5dfcfdc705d1a66.xlsx]

## Sheet: Table of Contents
Supplementary Tables
ST-1	Supplementary Table 1: Clinical screening criteria for cohort stratification.
ST-2	Supplementary Table 2: Demographics of participants in the Bio-Hermes Study.
ST-3	Supplementary Table 3: Demographics of participants in the external cohorts from GNPC version 1.1.
ST-4	Supplementary Table 4: Differentially abundant proteins between clinically diagnosed AD dementia versus cognitively normal controls.
ST-5	Supplementary Table 5: Differentially abundant proteins between biologically defined AD versus CN Core1–.
ST-6	Supplementary Table 6: Differentially abundant proteins between clinically diagnosed AD dementia versus cognitively normal controls in different subgroups
ST-7	Supplementary Table 7: Differentially abundant proteins between biologically defined AD versus CN Core1– in different subgroups
ST-8	Supplementary Table 8: Differences in protein levels between various disease stages.
ST-9	Supplementary Table 9: Differences in protein levels between various disease stages with APOE-ε4 adjustment.
ST-10	Supplementary Table 10: AD network module memberships.
ST-11	Supplementary Table 11: Correlations of AD network modules to AD endophenotypes.
ST-12	Supplementary Table 12: AD network eigenprotein differences by case status.
ST-13	Supplementary Table 13: Results of pathway enrichment analyses.
ST-14	Supplementary Table 14: Results of EWCE analyses.
ST-15	Supplementary Table 15: Results of protein importance ranking.
ST-16	Supplementary Table 16: Results of ROC analyses.
ST-17	Supplementary Table 17: Results of DeLong test P values for the comparison between AUCs.
ST-18	Supplementary Table 18: Results of validation analyses in the external cohort from GNPC version 1.1.
ST-19	Supplementary Table 19: Associations of selected proteins with AD endophenotypes.
ST-20	Supplementary Table 20: Associations of three top proteins with longitudinal MMSE score.
ST-21	Supplementary Table 21: Results of bidirectional two-sample Mendelian randomization analyses for proteins to AD.
ST-22	Supplementary Table 22: Results of bidirectional two-sample Mendelian randomization analyses for AD to proteins
ST-23	Supplementary Table 23: Results of bidirectional two-sample Mendelian randomization analyses for proteins to AD with APOE-ε4 adjustment.
ST-24	Supplementary Table 24: Results of bidirectional two-sample Mendelian randomization analyses for AD to proteins with APOE-ε4 adjustment.

## Sheet: ST-1
Supplementary Table 1: Clinical screening criteria for cohort stratification.
Screening criteria	CN	MCI	Mild AD dementia
Subjective memory loss or concern	None (self or partner)	May be present	Usually present
MMSE	26–30	24–30	20–24†
RAVLT	Within age- and race-adjusted norms; not >1.5 SD above mean	≥1 SD below age- and race-adjusted mean	≥1 SD below age- and race-adjusted mean
FAQ	No decline;	Minimal–mild impairment; independence preserved	Evidence of decline/dependence
Diagnostic basis	No clinical diagnosis of MCI/AD	NIA–AA MCI criteria met	NIA–AA Probable AD criteria met
Abbreviations: CN, cognitively normal; MCI, mild cognitive impairment; AD, Alzheimer’s disease; MMSE, Mini-Mental State Examination; RAVLT, Rey Auditory Verbal Learning Test; SD, standard deviation; FAQ, Functional Activities Questionnaire; NIA–AA, National Institute on Aging–Alzheimer’s Association.
† In selected cases, MMSE as low as 17 was permitted at investigator discretion.

## Sheet: ST-2
Supplementary Table 2: Demographics of participants in the Bio-Hermes Study.
Characteristics	CN, n = 405	MCI, n = 305	AD, n = 251	P value
Age, year	70 (65–75)	73 (66–78)	75 (71–79)	<0.001
Sex (female)	251 (61.98%)	166 (54.43%)	129 (51.39%)	0.017
Education, year	16 (14–18)	16 (13–18)	15 (12–17)	0.001
MMSE score	29 (28–30)	27 (26–29)	23 (21.5–25)	<0.001
FAQ score	0 (0–1)	2 (0–5)	8 (4–14)	<0.001
APOE-ε4 carriers	134 (33.09%)	115 (37.70%)	117 (43.82%)	0.022
Amyloid PET (positive)	81 (20.93%)	104 (36.24%)	141 (59.75%)	<0.001
Continuous data are described as median (interquartile range) and categorical variables are presented as numbers (percentages). P values for age, education, MMSE and FAQ were generated using a Kruskal–Wallis rank-sum test; P values for sex, APOE-ε4 carriers and amyloid PET were generated using a Pearson’s Chi-square test.
APOE, apolipoprotein E; FAQ, Functional Activities Questionnaire; MMSE, Mini-Mental State Examination.

## Sheet: ST-3
Supplementary Table 3: Demographics of participants in the external cohorts from GNPC version 1.1.
Demographics of participants in the GNPC version 1.1 Contributor C cohort.
Characteristics	CN, n = 832	MCI, n = 724	AD, n = 260	P value
Age, year	70 (56–77)	72 (65.75–76)	75 (70.75–79)	<0.001
Sex (female)	428 (51.44%)	333 (45.99%)	147 (56.54%)	0.008
Demographics of participants in the GNPC version 1.1 Contributor B, F and R cohorts.
Contributor	B, n = 997	F, n = 477	R, n = 181	P value
Age, year	61 (56–65)	73 (66–80)	82 (78–86)	<0.001
Sex (female)	385 (38.62%)	206 (43.19%)	53 (29.28%)	0.005
Continuous data were described as median (interquartile range) and categorical variables were presented as numbers (percentages). P values for age was generated using a Kruskal–Wallis rank-sum test; P values for sex was generated using a Pearson’s Chi-square test.

## Sheet: ST-4
Supplementary Table 4: Differentially abundant proteins between clinically diagnosed AD dementia versus cognitively normal controls.
Differential analyses between clinically diagnosed AD dementia versus cognitively normal controls
Group	Analytes	SeqID	Type	Target full name	Target	Uniprot ID	Entrez gene ID	Entrez gene symbol	Effect	p-value	p-value FDR
Clinically diagnosed AD dementia versus CN	seq.19222.124	19222-124	Protein	Ras-related protein Rab-5B	RAB5B	P61020	5869	RAB5B	-1.8554	2.23e-11	1.62e-07
Clinically diagnosed AD dementia versus CN	seq.5475.10	5475-10	Protein	Protein kinase C beta type (splice variant beta-II)	PKC-B-II	P05771	5579	PRKCB	-1.08246	8.09e-09	1.36e-05
Clinically diagnosed AD dementia versus CN	seq.25444.29	25444-29	Protein	Type I inositol 1,4,5-trisphosphate 5-phosphatase	I5P1	Q14642	3632	INPP5A	-1.37394	8.57e-09	1.36e-05
Clinically diagnosed AD dementia versus CN	seq.24425.8	24425-8	Protein	Methionyl-tRNA synthetase, cytoplasmic	SYMC	P56192	4141	MARS1	-1.59079	1.05e-08	1.36e-05
Clinically diagnosed AD dementia versus CN	seq.17818.22	17818-22	Protein	Protein SGT1 homolog	SUGT1	Q9Y2Z0	10910	SUGT1	-1.77033	1.21e-08	1.36e-05
Clinically diagnosed AD dementia versus CN	seq.18303.39	18303-39	Protein	Neurogranin	NEUG	Q92686	4900	NRGN	-0.751992	1.41e-08	1.36e-05
Clinically diagnosed AD dementia versus CN	seq.10980.11	10980-11	Protein	Acetylcholinesterase	ACES	P22303	43	ACHE	0.5367	1.65e-08	1.36e-05
Clinically diagnosed AD dementia versus CN	seq.25108.6	25108-6	Protein	Arginyl-tRNA--protein transferase 1	ATE1	O95260	11101	ATE1	-1.85993	1.86e-08	1.36e-05
Clinically diagnosed AD dementia versus CN	seq.9830.109	9830-109	Protein	Guanine nucleotide exchange factor VAV3	VAV3	Q9UKW4	10451	VAV3	0.666285	1.88e-08	1.36e-05
Clinically diagnosed AD dementia versus CN	seq.20950.159	20950-159	Protein	Phosphoribosyltransferase domain-containing protein 1	PRDC1	Q9NRG1	56952	PRTFDC1	-1.25216	1.88e-08	1.36e-05
Clinically diagnosed AD dementia versus CN	seq.19202.10	19202-10	Protein	Tyrosine-protein kinase BTK	BTK	Q06187	695	BTK	-0.988657	2.05e-08	1.36e-05
Clinically diagnosed AD dementia versus CN	seq.9855.10	9855-10	Protein	Transforming protein RhoA	Rho A	P61586	387	RHOA	-1.78221	2.27e-08	1.38e-05
Clinically diagnosed AD dementia versus CN	seq.22049.24	22049-24	Protein	14-3-3 protein eta	14-3-3 eta	Q04917	7533	YWHAH	-0.838788	2.66e-08	1.49e-05
Clinically diagnosed AD dementia versus CN	seq.12340.17	12340-17	Protein	Alanine--tRNA ligase, cytoplasmic	SYAC	P49588	16	AARS1	-1.44325	3.59e-08	1.87e-05
Clinically diagnosed AD dementia versus CN	seq.13044.5	13044-5	Protein	Tumor susceptibility gene 101 protein	TS101	Q99816	7251	TSG101	-2.18503	4.38e-08	2.13e-05
Clinically diagnosed AD dementia versus CN	seq.7875.86	7875-86	Protein	Pleckstrin	PLEK	P08567	5341	PLEK	-0.896471	4.72e-08	2.15e-05
Clinically diagnosed AD dementia versus CN	seq.19371.18	19371-18	Protein	Microtubule-associated protein RP/EB family member 1	MARE1	Q15691	22919	MAPRE1	-1.40116	6.33e-08	2.5e-05
Clinically diagnosed AD dementia versus CN	seq.3381.24	3381-24	Protein	Tyrosine-protein kinase Lyn, isoform B	LYNB	P07948	4067	LYN	-1.16207	6.41e-08	2.5e-05
Clinically diagnosed AD dementia versus CN	seq.21552.9	21552-9	Protein	Peroxisomal acyl-coenzyme A oxidase 1	ACOX1	Q15067	51	ACOX1	-1.1925	6.63e-08	2.5e-05
Clinically diagnosed AD dementia versus CN	seq.17744.31	17744-31	Protein	Ras-related protein Rab-11A	RB11A	P62491	8766	RAB11A	-1.29209	6.87e-08	2.5e-05
Clinically diagnosed AD dementia versus CN	seq.13615.60	13615-60	Protein	Cytoplasmic protein NCK2	NCK2	O43639	8440	NCK2	-1.14103	7.38e-08	2.56e-05
Clinically diagnosed AD dementia versus CN	seq.25292.4	25292-4	Protein	Carboxylesterase 3	EST3	Q6UWW8	23491	CES3	-0.951113	8.44e-08	2.76e-05
Clinically diagnosed AD dementia versus CN	seq.13636.20	13636-20	Protein	Nucleosome assembly protein 1-like 1	NP1L1	P55209	4673	NAP1L1	-1.14713	8.7e-08	2.76e-05
Clinically diagnosed AD dementia versus CN	seq.9755.19	9755-19	Protein	Drebrin-like protein	DBNL	Q9UJU6	28988	DBNL	-0.954739	1.03e-07	3.13e-05
Clinically diagnosed AD dementia versus CN	seq.11615.16	11615-16	Protein	Dual adapter for phosphotyrosine and 3-phosphotyrosine and 3-phosphoinositide	DAPP1	Q9UN19	27071	DAPP1	-0.926382	1.11e-07	3.24e-05
Clinically diagnosed AD dementia versus CN	seq.18232.42	18232-42	Protein	Phosphatidylinositol 5-phosphate 4-kinase type-2 beta	PI42B	P78356	8396	PIP4K2B	-1.56005	1.17e-07	3.28e-05
Clinically diagnosed AD dementia versus CN	seq.21933.7	21933-7	Protein	Ubiquitin-like modifier-activating enzyme 7	UBA7	P41226	7318	UBA7	-0.971958	1.33e-07	3.5e-05
Clinically diagnosed AD dementia versus CN	seq.11634.32	11634-32	Protein	Regulator of G-protein signaling 10	RGS10	O43665	6001	RGS10	-1.09325	1.42e-07	3.5e-05
Clinically diagnosed AD dementia versus CN	seq.16885.49	16885-49	Protein	Microtubule-associated protein RP/EB family member 3	MARE3	Q9UPY8	22924	MAPRE3	-0.683156	1.44e-07	3.5e-05
Clinically diagnosed AD dementia versus CN	seq.5858.6	5858-6	Protein	14-3-3 protein zeta/delta	14-3-3 protein zeta/delta	P63104	7534	YWHAZ	-0.990032	1.51e-07	3.5e-05
Clinically diagnosed AD dementia versus CN	seq.14287.6	14287-6	Protein	Ras-related protein Rab-5C	RAB5C	P51148	5878	RAB5C	-1.6556	1.53e-07	3.5e-05
Clinically diagnosed AD dementia versus CN	seq.17450.51	17450-51	Protein	Histidine--tRNA ligase, cytoplasmic	Histidyl-tRNA synthetase	P12081	3035	HARS1	-1.3505	1.53e-07	3.5e-05
Clinically diagnosed AD dementia versus CN	seq.18224.11	18224-11	Protein	Charged multivesicular body protein 1a	CHM1A	Q9HD42	5119	CHMP1A	-1.22231	2.13e-07	4.71e-05
Clinically diagnosed AD dementia versus CN	seq.12697.30	12697-30	Protein	Phosphatidylinositol 5-phosphate 4-kinase type-2 alpha	PI42A	P48426	5305	PIP4K2A	-1.49104	2.95e-07	6.33e-05
Clinically diagnosed AD dementia versus CN	seq.23915.18	23915-18	Protein	Ras-related protein Rab-7	Rab-7	P51149	7879	RAB7A	-0.95922	3.16e-07	6.58e-05
Clinically diagnosed AD dementia versus CN	seq.10053.5	10053-5	Protein	Integrin-linked protein kinase	ILK1	Q13418	3611	ILK	-0.995542	3.51e-07	7.02e-05
Clinically diagnosed AD dementia versus CN	seq.11458.30	11458-30	Protein	Poly(rC)-binding protein 1	PCBP1	Q15365	5093	PCBP1	-1.29936	3.58e-07	7.02e-05
Clinically diagnosed AD dementia versus CN	seq.25042.3	25042-3	Protein	NAD-dependent malic enzyme, mitochondrial	MAOM	P23368	4200	ME2	-1.03434	3.7e-07	7.02e-05
Clinically diagnosed AD dementia versus CN	seq.17350.13	17350-13	Protein	Charged multivesicular body protein 2b	CHM2B	Q9UQN3	25978	CHMP2B	-1.28562	3.75e-07	7.02e-05
Clinically diagnosed AD dementia versus CN	seq.24432.3	24432-3	Protein	GRIP1-associated protein 1	GRAP1	Q4V328	56850	GRIPAP1	-1.54155	4.29e-07	7.82e-05
Clinically diagnosed AD dementia versus CN	seq.7660.21	7660-21	Protein	Tropomyosin alpha-4 chain	Tropomyosin 4	P67936	7171	TPM4	-0.914664	4.68e-07	8.32e-05
Clinically diagnosed AD dementia versus CN	seq.19223.6	19223-6	Protein	Ras-related protein Rab-1A	RAB1A	P62820	5861	RAB1A	-0.847829	5.79e-07	9.8e-05
Clinically diagnosed AD dementia versus CN	seq.25232.4	25232-4	Protein	EH domain-containing protein 3	EHD3	Q9NZN3	30845	EHD3	-1.20267	5.8e-07	9.8e-05
Clinically diagnosed AD dementia versus CN	seq.23521.29	23521-29	Protein	Nucleoside diphosphate kinase 7	NDK7	Q9Y5B8	29922	NME7	-1.80353	5.91e-07	9.8e-05
Clinically diagnosed AD dementia versus CN	seq.9762.14	9762-14	Protein	Vasodilator-stimulated phosphoprotein	VASP	P50552	7408	VASP	-0.753985	6.43e-07	0.000102
Clinically diagnosed AD dementia versus CN	seq.3453.87	3453-87	Protein	Tyrosine-protein kinase Lyn	LYN	P07948	4067	LYN	-1.3599	6.45e-07	0.000102
Clinically diagnosed AD dementia versus CN	seq.2644.11	2644-11	Protein	Protein kinase C alpha type	PKC-A	P17252	5578	PRKCA	-1.10315	6.65e-07	0.000103
Clinically diagnosed AD dementia versus CN	seq.18309.18	18309-18	Protein	Citrate synthase, mitochondrial	CISY	O75390	1431	CS	-0.910982	7.37e-07	0.000112
Clinically diagnosed AD dementia versus CN	seq.22824.53	22824-53	Protein	V-type proton ATPase subunit C 2	VATC2	Q8NEY4	245973	ATP6V1C2	-1.2843	8.13e-07	0.000121
Clinically diagnosed AD dementia versus CN	seq.3887.90	3887-90	Protein	Importin subunit beta-1	IMB1	Q14974	3837	KPNB1	-1.50584	8.4e-07	0.000122
Clinically diagnosed AD dementia versus CN	seq.21188.38	21188-38	Protein	RWD domain-containing protein 4	RWDD4	Q6NW29	201965	RWDD4	-1.80305	8.73e-07	0.000125
Clinically diagnosed AD dementia versus CN	seq.25479.8	25479-8	Protein	Leucine-rich repeat flightless-interacting protein 2	LRRF2	Q9Y608	9209	LRRFIP2	-0.977091	9.11e-07	0.000125
Clinically diagnosed AD dementia versus CN	seq.12034.28	12034-28	Protein	Adenylyl cyclase-associated protein 1	CAP 1	Q01518	10487	CAP1	-0.641448	9.25e-07	0.000125
Clinically diagnosed AD dementia versus CN	seq.14203.3	14203-3	Protein	Annexin A7	ANXA7	P20073	310	ANXA7	-1.19521	9.44e-07	0.000125
Clinically diagnosed AD dementia versus CN	seq.18244.1	18244-1	Protein	Annexin A7	ANXA7	P20073	310	ANXA7	-1.18315	9.47e-07	0.000125
Clinically diagnosed AD dementia versus CN	seq.4249.64	4249-64	Protein	Nucleoside diphosphate kinase B	NDP kinase B	P22392	4831	NME2	-1.06892	1.1e-06	0.000143
Clinically diagnosed AD dementia versus CN	seq.3416.2	3416-2	Protein	Tyrosine-protein kinase BTK	BTK	Q06187	695	BTK	-1.28383	1.19e-06	0.000149
Clinically diagnosed AD dementia versus CN	seq.19250.50	19250-50	Protein	C-Myc-binding protein	MYCBP	Q99417	26292	MYCBP	-1.25738	1.2e-06	0.000149
Clinically diagnosed AD dementia versus CN	seq.20130.144	20130-144	Protein	Casein kinase I isoform gamma-1	KC1G1	Q9HCP0	53944	CSNK1G1	-1.4113	1.2e-06	0.000149
Clinically diagnosed AD dementia versus CN	seq.3363.31	3363-31	Protein	Tyrosine-protein kinase CSK	CSK	P41240	1445	CSK	-0.857493	1.24e-06	0.000151
Clinically diagnosed AD dementia versus CN	seq.19373.3	19373-3	Protein	Myosin regulatory light chain 12A	MLRM	P19105	10627	MYL12A	-0.927265	1.28e-06	0.000153
Clinically diagnosed AD dementia versus CN	seq.5464.52	5464-52	Protein	Growth factor receptor-bound protein 2	GRB2 adapter protein	P62993	2885	GRB2	-1.13519	1.32e-06	0.000155
Clinically diagnosed AD dementia versus CN	seq.12687.2	12687-2	Protein	2,4-dienoyl-CoA reductase, mitochondrial	DECR	Q16698	1666	DECR1	-0.962728	1.36e-06	0.000157
Clinically diagnosed AD dementia versus CN	seq.11816.84	11816-84	Protein	Tyrosine-protein kinase JAK2	JAK2	O60674	3717	JAK2	-1.04722	1.56e-06	0.000178
Clinically diagnosed AD dementia versus CN	seq.18383.9	18383-9	Protein	Peptidyl-prolyl cis-trans isomerase FKBP3	FKBP3	Q00688	2287	FKBP3	-1.00544	1.67e-06	0.000187
Clinically diagnosed AD dementia versus CN	seq.5248.68	5248-68	Protein	Peptidyl-prolyl cis-trans isomerase F, mitochondrial	Cyclophilin F	P30405	10105	PPIF	-0.826977	1.74e-06	0.000192
Clinically diagnosed AD dementia versus CN	seq.19578.19	19578-19	Protein	Docking protein 2	DOK2	O60496	9046	DOK2	-1.00769	1.78e-06	0.000193
Clinically diagnosed AD dementia versus CN	seq.19259.176	19259-176	Protein	Eukaryotic translation initiation factor 2 subunit 1	IF2A	P05198	1965	EIF2S1	-1.45797	1.8e-06	0.000193
Clinically diagnosed AD dementia versus CN	seq.25273.80	25273-80	Protein	Caldesmon	Caldesmon	Q05682	800	CALD1	-0.773386	1.87e-06	0.000198
Clinically diagnosed AD dementia versus CN	seq.19113.66	19113-66	Protein	SH3 domain-binding glutamic acid-rich-like protein 2	SH3L2	Q9UJC5	83699	SH3BGRL2	-1.13575	2.04e-06	0.000212
Clinically diagnosed AD dementia versus CN	seq.25048.30	25048-30	Protein	Protein kinase C and casein kinase substrate in neurons protein 2	PACN2	Q9UNF0	11252	PACSIN2	-0.921283	2.26e-06	0.000232
Clinically diagnosed AD dementia versus CN	seq.12499.108	12499-108	Protein	Endophilin-A1	SH3G2	Q99962	6456	SH3GL2	-1.23539	2.34e-06	0.000237
Clinically diagnosed AD dementia versus CN	seq.3646.7	3646-7	Protein	Tyrosine-protein kinase Tec	TEC	P42680	7006	TEC	0.713144	3.13e-06	0.000313
Clinically diagnosed AD dementia versus CN	seq.17513.11	17513-11	Protein	Annexin A11	ANX11	P50995	311	ANXA11	-0.926485	3.19e-06	0.000314
Clinically diagnosed AD dementia versus CN	seq.12558.3	12558-3	Protein	Ubiquitin-associated and SH3 domain-containing protein B	UBS3B	Q8TF42	84959	UBASH3B	-0.883202	3.35e-06	0.000326
Clinically diagnosed AD dementia versus CN	seq.10531.18	10531-18	Protein	GTPase NRas	RASN	P01111	4893	NRAS	-0.611188	3.4e-06	0.000326
Clinically diagnosed AD dementia versus CN	seq.2855.49	2855-49	Protein	Mitogen-activated protein kinase 3	ERK-1	P27361	5595	MAPK3	-1.84371	3.86e-06	0.000363
Clinically diagnosed AD dementia versus CN	seq.23376.56	23376-56	Protein	Actin-related protein 2/3 complex subunit 2	ARPC2	O15144	10109	ARPC2	-1.11424	3.9e-06	0.000363
Clinically diagnosed AD dementia versus CN	seq.19194.9	19194-9	Protein	D-tyrosyl-tRNA(Tyr) deacylase 1	Histidyl-tRNA synthetase-related	Q8TEA8	92675	DTD1	-0.990865	3.94e-06	0.000363
Clinically diagnosed AD dementia versus CN	seq.4209.60	4209-60	Protein	Vacuolar protein sorting-associated protein VTA1 homolog	DRG-1	Q9NP79	51534	VTA1	-1.46219	4.05e-06	0.000369
Clinically diagnosed AD dementia versus CN	seq.20243.26	20243-26	Protein	Profilin-1	Profilin-1	P07737	5216	PFN1	-0.93468	4.35e-06	0.000391
Clinically diagnosed AD dementia versus CN	seq.11636.33	11636-33	Protein	Transgelin-2	Transgelin-2	P37802	8407	TAGLN2	-0.918264	4.52e-06	0.000397
Clinically diagnosed AD dementia versus CN	seq.6609.22	6609-22	Protein	2',3'-cyclic-nucleotide 3'-phosphodiesterase	CN37	P09543	1267	CNP	-1.74256	4.65e-06	0.000397
Clinically diagnosed AD dementia versus CN	seq.3844.2	3844-2	Protein	Peptidyl-prolyl cis-trans isomerase A	Cyclophilin A	P62937	5478	PPIA	-1.24186	4.68e-06	0.000397
Clinically diagnosed AD dementia versus CN	seq.9843.5	9843-5	Protein	Alpha-actinin-1	ACTN1	P12814	87	ACTN1	-1.12334	4.73e-06	0.000397
Clinically diagnosed AD dementia versus CN	seq.17151.84	17151-84	Protein	Interferon regulatory factor 3	IRF-3	Q14653	3661	IRF3	-1.56944	4.75e-06	0.000397
Clinically diagnosed AD dementia versus CN	seq.3466.8	3466-8	Protein	cAMP-dependent protein kinase catalytic subunit alpha	PRKACA	P17612	5566	PRKACA	-0.878492	4.8e-06	0.000397
Clinically diagnosed AD dementia versus CN	seq.12469.19	12469-19	Protein	Microtubule-associated protein RP/EB family member 1	MARE1	Q15691	22919	MAPRE1	-1.173	4.82e-06	0.000397
Clinically diagnosed AD dementia versus CN	seq.21963.48	21963-48	Protein	Disabled homolog 2	DAB2	P98082	1601	DAB2	-0.94528	4.85e-06	0.000397
Clinically diagnosed AD dementia versus CN	seq.12649.80	12649-80	Protein	Malate dehydrogenase, mitochondrial	Malate dehydrogenase 2	P40926	4191	MDH2	-0.799742	4.94e-06	0.0004
Clinically diagnosed AD dementia versus CN	seq.17205.21	17205-21	Protein	Ras-related protein Rab-5A	RAB5A	P20339	5868	RAB5A	-1.49854	5.04e-06	0.000404
Clinically diagnosed AD dementia versus CN	seq.23302.19	23302-19	Protein	Proline-rich AKT1 substrate 1	AKTS1	Q96B36	84335	AKT1S1	-1.27232	5.23e-06	0.000414
Clinically diagnosed AD dementia versus CN	seq.21862.145	21862-145	Protein	LIM and SH3 domain protein 1	LASP-1	Q14847	3927	LASP1	-1.40088	5.72e-06	0.000448
Clinically diagnosed AD dementia versus CN	seq.25115.21	25115-21	Protein	FH1/FH2 domain-containing protein 1	FHOD1	Q9Y613	29109	FHOD1	-0.934099	5.79e-06	0.000449
Clinically diagnosed AD dementia versus CN	seq.9929.16	9929-16	Protein	3-keto-steroid reductase:Extracellular domain (partial)	DHB7:ECD	P56937	51478	HSD17B7	-0.744615	5.87e-06	0.000449
Clinically diagnosed AD dementia versus CN	seq.18207.6	18207-6	Protein	Charged multivesicular body protein 1b	CHM1B	Q7LBR1	57132	CHMP1B	-1.37115	5.91e-06	0.000449
Clinically diagnosed AD dementia versus CN	seq.12617.2	12617-2	Protein	Serine/threonine-protein kinase 24	STK24	Q9Y6E0	8428	STK24	-0.945279	6.17e-06	0.000464
Clinically diagnosed AD dementia versus CN	seq.18236.3	18236-3	Protein	Galectin-related protein	LEGL	Q3ZCW2	29094	LGALSL	-0.927945	6.77e-06	0.000504
Clinically diagnosed AD dementia versus CN	seq.20083.1	20083-1	Protein	Ras-related protein Rab-6A	RAB6A	P20340	5870	RAB6A	-1.60359	6.93e-06	0.00051
Clinically diagnosed AD dementia versus CN	seq.17676.13	17676-13	Protein	Cdc42-interacting protein 4	CIP4	Q15642	9322	TRIP10	-0.95148	7e-06	0.00051
Clinically diagnosed AD dementia versus CN	seq.17728.61	17728-61	Protein	Charged multivesicular body protein 2a	CHM2A	O43633	27243	CHMP2A	-1.70207	7.57e-06	0.000546
Clinically diagnosed AD dementia versus CN	seq.14271.23	14271-23	Protein	Ras-related protein Rab-6B	RAB6B	Q9NRW1	51560	RAB6B	-1.21893	8.67e-06	0.000616
Clinically diagnosed AD dementia versus CN	seq.23329.52	23329-52	Protein	Ras-related protein Rab-4B	RAB4B	P61018	53916	RAB4B	-1.08947	8.71e-06	0.000616
Clinically diagnosed AD dementia versus CN	seq.11428.31	11428-31	Protein	PDZ and LIM domain protein 1	PDLI1	O00151	9124	PDLIM1	-0.944594	9.22e-06	0.000646
Clinically diagnosed AD dementia versus CN	seq.22984.10	22984-10	Protein	Eukaryotic initiation factor 4A-II	IF4A2	Q14240	1974	EIF4A2	-1.09682	9.48e-06	0.000658
Clinically diagnosed AD dementia versus CN	seq.12869.68	12869-68	Protein	Probable ATP-dependent RNA helicase DDX6	DDX6	P26196	1656	DDX6	-1.02304	9.64e-06	0.000663
Clinically diagnosed AD dementia versus CN	seq.2870.29	2870-29	Protein	Ras-related C3 botulinum toxin substrate 1	RAC1	P63000	5879	RAC1	-1.26807	9.87e-06	0.000668
Clinically diagnosed AD dementia versus CN	seq.19263.147	19263-147	Protein	Eukaryotic translation initiation factor 4E	IF4E	P06730	1977	EIF4E	-0.839227	9.92e-06	0.000668
Clinically diagnosed AD dementia versus CN	seq.15534.26	15534-26	Protein	Malate dehydrogenase, mitochondrial	Malate dehydrogenase 2	P40926	4191	MDH2	-0.918829	1e-05	0.000668
Clinically diagnosed AD dementia versus CN	seq.23265.15	23265-15	Protein	Tumor protein D54	TPD54	O43399	7165	TPD52L2	-0.97645	1.01e-05	0.000668
Clinically diagnosed AD dementia versus CN	seq.21196.29	21196-29	Protein	SAM domain-containing protein SAMSN-1	SAMN1	Q9NSI8	64092	SAMSN1	0.616606	1.02e-05	0.000668
Clinically diagnosed AD dementia versus CN	seq.17411.55	17411-55	Protein	Ubiquitin recognition factor in ER-associated degradation protein 1	UFD1	Q92890	7353	UFD1	-1.43684	1.03e-05	0.000668
Clinically diagnosed AD dementia versus CN	seq.19262.219	19262-219	Protein	Very long-chain specific acyl-CoA dehydrogenase, mitochondrial	ACADV	P49748	37	ACADVL	-1.09769	1.05e-05	0.00067
Clinically diagnosed AD dementia versus CN	seq.13654.1	13654-1	Protein	Rho-associated protein kinase 2	ROCK2	O75116	9475	ROCK2	-1.17293	1.06e-05	0.00067
Clinically diagnosed AD dementia versus CN	seq.17436.193	17436-193	Protein	Casein kinase I isoform gamma-2	CSNK1G2	P78368	1455	CSNK1G2	-1.50711	1.06e-05	0.00067
Clinically diagnosed AD dementia versus CN	seq.24901.4	24901-4	Protein	Villin-1	VILI	P09327	7429	VIL1	-0.935679	1.07e-05	0.00067
Clinically diagnosed AD dementia versus CN	seq.5488.74	5488-74	Protein	Proto-oncogene tyrosine-protein kinase Src isoform 2	SRCN1	P12931	6714	SRC	-0.781005	1.1e-05	0.000682
Clinically diagnosed AD dementia versus CN	seq.21743.1	21743-1	Protein	WD repeat-containing protein 48	WDR48	Q8TAF3	57599	WDR48	-1.44176	1.14e-05	0.000704
Clinically diagnosed AD dementia versus CN	seq.5062.60	5062-60	Protein	CD226 antigen	CD226	Q15762	10666	CD226	0.518271	1.17e-05	0.000715
Clinically diagnosed AD dementia versus CN	seq.3905.62	3905-62	Protein	Ubiquitin-conjugating enzyme E2 N	UBE2N	P61088	7334	UBE2N	-0.752332	1.34e-05	0.000813
Clinically diagnosed AD dementia versus CN	seq.12386.11	12386-11	Protein	Aminopeptidase B	AMPB	Q9H4A4	6051	RNPEP	-0.463967	1.37e-05	0.000823
Clinically diagnosed AD dementia versus CN	seq.19163.26	19163-26	Protein	Leucine-rich repeat-containing protein 59	LRC59	Q96AG4	55379	LRRC59	-0.856291	1.45e-05	0.000864
Clinically diagnosed AD dementia versus CN	seq.4179.57	4179-57	Protein	14-3-3 protein gamma	14-3-3 protein gamma	P61981	7532	YWHAG	-0.573709	1.46e-05	0.000864
Clinically diagnosed AD dementia versus CN	seq.17686.27	17686-27	Protein	Tubulin-folding cofactor B	TBCB	Q99426	1155	TBCB	-0.958458	1.49e-05	0.000874
Clinically diagnosed AD dementia versus CN	seq.12643.4	12643-4	Protein	Beta-arrestin-1	ARRB1	P49407	408	ARRB1	-1.18402	1.66e-05	0.000965
Clinically diagnosed AD dementia versus CN	seq.12993.21	12993-21	Protein	Nuclear protein localization protein 4 homolog	NPL4	Q8TAT6	55666	NPLOC4	-1.50061	1.67e-05	0.000965
Clinically diagnosed AD dementia versus CN	seq.21817.5	21817-5	Protein	Myosin, light chain 9, regulatory	MYL9	P24844	10398	MYL9	-0.733902	1.75e-05	0.001
Clinically diagnosed AD dementia versus CN	seq.2789.26	2789-26	Protein	Matrilysin	MMP-7	P09237	4316	MMP7	0.408638	1.76e-05	0.001
Clinically diagnosed AD dementia versus CN	seq.8095.213	8095-213	Protein	Peptidyl-prolyl cis-trans isomerase F, mitochondrial	Cyclophilin F	P30405	10105	PPIF	-0.78897	1.87e-05	0.00105
Clinically diagnosed AD dementia versus CN	seq.24235.2	24235-2	Protein	EH domain-containing protein 1	EHD1	Q9H4M9	10938	EHD1	-1.05225	1.89e-05	0.00106
Clinically diagnosed AD dementia versus CN	seq.18186.15	18186-15	Protein	Threonine--tRNA ligase, cytoplasmic	SYTC	P26639	6897	TARS1	-1.3895	1.93e-05	0.00107
Clinically diagnosed AD dementia versus CN	seq.2682.68	2682-68	Protein	60 kDa heat shock protein, mitochondrial	HSP 60	P10809	3329	HSPD1	-0.895655	2.07e-05	0.00114
Clinically diagnosed AD dementia versus CN	seq.17826.341	17826-341	Protein	Elongation factor 1-delta	EF1D	P29692	1936	EEF1D	-0.876919	2.08e-05	0.00114
Clinically diagnosed AD dementia versus CN	seq.9738.7	9738-7	Protein	FAS-associated factor 2	FAF2	Q96CS3	23197	FAF2	-1.29167	2.42e-05	0.00132
Clinically diagnosed AD dementia versus CN	seq.12395.86	12395-86	Protein	Aspartate--tRNA ligase, mitochondrial	SYDM	Q6PI48	55157	DARS2	-0.980123	2.44e-05	0.00132
Clinically diagnosed AD dementia versus CN	seq.7740.33	7740-33	Protein	Fetal and adult testis-expressed transcript protein	FATE1	Q969F0	89885	FATE1	0.468854	2.49e-05	0.00133
Clinically diagnosed AD dementia versus CN	seq.21110.5	21110-5	Protein	Ubiquitin-conjugating enzyme E2 Z	UBE2Z	Q9H832	65264	UBE2Z	-0.612621	2.54e-05	0.00135
Clinically diagnosed AD dementia versus CN	seq.6467.65	6467-65	Protein	Protein O-glucosyltransferase 1	KTEL1	Q8NBL1	56983	POGLUT1	-1.23632	2.58e-05	0.00136
Clinically diagnosed AD dementia versus CN	seq.19173.5	19173-5	Protein	AN1-type zinc finger protein 1	ZFAN1	Q8TCF1	79752	ZFAND1	-1.06712	2.63e-05	0.00138
Clinically diagnosed AD dementia versus CN	seq.14156.33	14156-33	Protein	14-3-3 protein beta/alpha	14-3-3 protein beta/alpha	P31946	7529	YWHAB	-1.84241	2.66e-05	0.00139
Clinically diagnosed AD dementia versus CN	seq.8901.40	8901-40	Protein	14-3-3 protein gamma	14-3-3 protein gamma	P61981	7532	YWHAG	-0.774832	2.7e-05	0.0014
Clinically diagnosed AD dementia versus CN	seq.9223.11	9223-11	Protein	Mesencephalic astrocyte-derived neurotrophic factor	ARMET	P55145	7873	MANF	-1.16064	2.72e-05	0.0014
Clinically diagnosed AD dementia versus CN	seq.18183.3	18183-3	Protein	Low density lipoprotein receptor adapter protein 1	ARH	Q5SW96	26119	LDLRAP1	-0.868866	2.78e-05	0.00141
Clinically diagnosed AD dementia versus CN	seq.9846.32	9846-32	Protein	Rho GDP-dissociation inhibitor 2	Rho-GDI beta	P52566	397	ARHGDIB	-1.23009	2.91e-05	0.00147
Clinically diagnosed AD dementia versus CN	seq.15529.33	15529-33	Protein	Cysteine and glycine-rich protein 1	Cysteine-rich protein 1	P21291	1465	CSRP1	-0.75309	3.21e-05	0.00161
Clinically diagnosed AD dementia versus CN	seq.9970.7	9970-7	Protein	UBX domain-containing protein 4:Cytoplasmic domain 2	UBXN4:CD 2	Q92575	23190	UBXN4	0.489313	3.23e-05	0.00161
Clinically diagnosed AD dementia versus CN	seq.17675.17	17675-17	Protein	Acyl-coenzyme A thioesterase 13	ACO13	Q9NPJ3	55856	ACOT13	-0.908221	3.26e-05	0.00162
Clinically diagnosed AD dementia versus CN	seq.13622.16	13622-16	Protein	Serine/threonine-protein phosphatase 2A 56 kDa regulatory subunit alpha isoform	2A5A	Q15172	5525	PPP2R5A	-1.34069	3.3e-05	0.00163
Clinically diagnosed AD dementia versus CN	seq.19249.18	19249-18	Protein	Lysine--tRNA ligase	SYK	Q15046	3735	KARS1	-1.17203	3.42e-05	0.00167
Clinically diagnosed AD dementia versus CN	seq.23396.21	23396-21	Protein	Twinfilin-2	TWF2	Q6IBS0	11344	TWF2	-1.27815	3.45e-05	0.00168
Clinically diagnosed AD dementia versus CN	seq.24435.1	24435-1	Protein	Dynamin-1	Dynamin	Q05193	1759	DNM1	-0.890065	3.58e-05	0.00173
Clinically diagnosed AD dementia versus CN	seq.11347.9	11347-9	Protein	Transaldolase	Transaldolase	P37837	6888	TALDO1	-0.514033	3.62e-05	0.00174
Clinically diagnosed AD dementia versus CN	seq.11493.169	11493-169	Protein	Dynein light chain 2, cytoplasmic	DYL2	Q96FJ2	140735	DYNLL2	-1.7734	3.67e-05	0.00175
Clinically diagnosed AD dementia versus CN	seq.19274.80	19274-80	Protein	Alpha-1-syntrophin	Alpha-1-syntrophin	Q13424	6640	SNTA1	-1.13598	3.73e-05	0.00177
Clinically diagnosed AD dementia versus CN	seq.18318.98	18318-98	Protein	Endophilin-A3	SH3G3	Q99963	6457	SH3GL3	-1.10595	3.88e-05	0.00182
Clinically diagnosed AD dementia versus CN	seq.4220.39	4220-39	Protein	Tyrosine-protein kinase Fer	FER	P16591	2241	FER	-1.10596	4.03e-05	0.00188
Clinically diagnosed AD dementia versus CN	seq.20445.29	20445-29	Protein	AP-1 complex-associated regulatory protein	AP1AR	Q63HQ0	55435	AP1AR	-0.470403	4.12e-05	0.00191
Clinically diagnosed AD dementia versus CN	seq.20943.14	20943-14	Protein	N-alpha-acetyltransferase 50	NAA50	Q9GZZ1	80218	NAA50	-1.35363	4.2e-05	0.00194
Clinically diagnosed AD dementia versus CN	seq.4230.1	4230-1	Protein	Eukaryotic translation initiation factor 4 gamma 2	IF4G2	P78344	1982	EIF4G2	-1.02346	4.31e-05	0.00198
Clinically diagnosed AD dementia versus CN	seq.25209.15	25209-15	Protein	Sodium/potassium-transporting ATPase gamma chain	ATNG	P54710	486	FXYD2	0.378239	4.67e-05	0.00212
Clinically diagnosed AD dementia versus CN	seq.20139.57	20139-57	Protein	Endophilin-A1	SH3G2	Q99962	6456	SH3GL2	-1.13063	4.68e-05	0.00212
Clinically diagnosed AD dementia versus CN	seq.19760.26	19760-26	Protein	Carboxypeptidase A1	CBPA1	P15085	1357	CPA1	0.422539	4.93e-05	0.0022
Clinically diagnosed AD dementia versus CN	seq.21889.2	21889-2	Protein	Uncharacterized protein C7orf24	CG024	O75223	79017	GGCT	0.456118	4.93e-05	0.0022
Clinically diagnosed AD dementia versus CN	seq.20073.22	20073-22	Protein	GTPase KRas	K-ras	P01116	3845	KRAS	-0.450911	4.95e-05	0.0022
Clinically diagnosed AD dementia versus CN	seq.19224.5	19224-5	Protein	Eukaryotic translation initiation factor 1A, Y-chromosomal	IF1AY	O14602	9086	EIF1AY	-1.03656	5.09e-05	0.00225
Clinically diagnosed AD dementia versus CN	seq.4983.6	4983-6	Protein	Endoplasmic reticulum resident protein 29	ERP29	P30040	10961	ERP29	0.383889	5.28e-05	0.00232
Clinically diagnosed AD dementia versus CN	seq.11659.31	11659-31	Protein	Clathrin interactor 1	EPN4	Q14677	9685	CLINT1	-1.17778	5.73e-05	0.0025
Clinically diagnosed AD dementia versus CN	seq.18299.13	18299-13	Protein	Calpain small subunit 1	CPNS1	P04632	826	CAPNS1	0.549323	6.62e-05	0.00287
Clinically diagnosed AD dementia versus CN	seq.5888.29	5888-29	Protein	Eukaryotic translation initiation factor 5A-1	eIF-5A-1	P63241	1984	EIF5A	-1.21908	6.69e-05	0.00288
Clinically diagnosed AD dementia versus CN	seq.13930.3	13930-3	Protein	DNA dC->dU-editing enzyme APOBEC-3G	ABC3G	Q9HC16	60489	APOBEC3G	1.05117	7.12e-05	0.00305
Clinically diagnosed AD dementia versus CN	seq.4153.11	4153-11	Protein	Alpha-1-antichymotrypsin complex	alpha-1-antichymotrypsin complex	P01011	12	SERPINA3	0.6492	7.16e-05	0.00305
Clinically diagnosed AD dementia versus CN	seq.20086.5	20086-5	Protein	Ras-related protein Rab-11B	RB11B	Q15907	9230	RAB11B	-1.56204	7.3e-05	0.00307
Clinically diagnosed AD dementia versus CN	seq.15613.16	15613-16	Protein	Pancreatic triacylglycerol lipase	LIPP	P16233	5406	PNLIP	0.365904	7.3e-05	0.00307
Clinically diagnosed AD dementia versus CN	seq.15693.9	15693-9	Protein	Progesterone receptor	PgR	P06401	5241	PGR	0.667933	7.32e-05	0.00307
Clinically diagnosed AD dementia versus CN	seq.24475.45	24475-45	Protein	Sorting nexin-12	SNX12	Q9UMY4	29934	SNX12	-1.07958	7.47e-05	0.00311
Clinically diagnosed AD dementia versus CN	seq.12678.66	12678-66	Protein	U1 small nuclear ribonucleoprotein A	SNRPA	P09012	6626	SNRPA	0.480312	7.83e-05	0.00324
Clinically diagnosed AD dementia versus CN	seq.4297.62	4297-62	Protein	Spondin-1	Spondin-1	Q9HCB6	10418	SPON1	0.422141	7.86e-05	0.00324
Clinically diagnosed AD dementia versus CN	seq.18829.4	18829-4	Protein	Eukaryotic initiation factor 4A-I	IF4A1	P60842	1973	EIF4A1	-0.690491	7.96e-05	0.00326
Clinically diagnosed AD dementia versus CN	seq.18181.2	18181-2	Protein	Protein TSSC4	TSSC4	Q9Y5U2	10078	TSSC4	0.924385	8.17e-05	0.00333
Clinically diagnosed AD dementia versus CN	seq.24671.15	24671-15	Protein	Apoptosis-associated speck-like protein containing a CARD	ASC	Q9ULZ3	29108	PYCARD	0.363181	8.64e-05	0.00349
Clinically diagnosed AD dementia versus CN	seq.15301.24	15301-24	Protein	Acrosomal protein SP-10	sperm protein 10	P26436	56	ACRV1	0.439185	8.67e-05	0.00349
Clinically diagnosed AD dementia versus CN	seq.12691.44	12691-44	Protein	Serine hydroxymethyltransferase, mitochondrial	GLYM	P34897	6472	SHMT2	-0.767057	9.8e-05	0.00392
Clinically diagnosed AD dementia versus CN	seq.19188.21	19188-21	Protein	nucleosome assembly protein 1-like 4	NAP2L	Q99733	4676	NAP1L4	-1.26354	9.88e-05	0.00393
Clinically diagnosed AD dementia versus CN	seq.21383.37	21383-37	Protein	Asparaginyl-tRNA synthetase, cytoplasmic	SYNC	O43776	4677	NARS1	-1.01396	0.0001	0.00397
Clinically diagnosed AD dementia versus CN	seq.17737.7	17737-7	Protein	Isovaleryl-CoA dehydrogenase, mitochondrial	IVD	P26440	3712	IVD	-0.861457	0.000101	0.00397
Clinically diagnosed AD dementia versus CN	seq.17380.2	17380-2	Protein	Ubiquitin-conjugating enzyme E2 K	UBE2K	P61086	3093	UBE2K	-0.888145	0.000102	0.00399
Clinically diagnosed AD dementia versus CN	seq.5594.87	5594-87	Protein	LDLR chaperone MESD	MESD2	Q14696	23184	MESD	0.509605	0.000102	0.00399
Clinically diagnosed AD dementia versus CN	seq.12740.55	12740-55	Protein	Protein FEV	FEV	Q99581	54738	FEV	0.936583	0.000105	0.00407
Clinically diagnosed AD dementia versus CN	seq.12956.40	12956-40	Protein	KIF1-binding protein	KBP	Q96EK5	26128	KIFBP	-1.02173	0.000106	0.00407
Clinically diagnosed AD dementia versus CN	seq.24414.3	24414-3	Protein	Glycogen phosphorylase, brain form	Glycogen phosphorylase	P11216	5834	PYGB	-0.864957	0.000106	0.00408
Clinically diagnosed AD dementia versus CN	seq.21378.7	21378-7	Protein	Polyribonucleotide nucleotidyltransferase 1, mitochondrial	PNPT1	Q8TCS8	87178	PNPT1	-1.04313	0.000109	0.00414
Clinically diagnosed AD dementia versus CN	seq.9952.57	9952-57	Protein	Transcription factor A, mitochondrial	TFAM	Q00059	7019	TFAM	-1.10155	0.000109	0.00414
Clinically diagnosed AD dementia versus CN	seq.9244.27	9244-27	Protein	Palmitoyl-protein thioesterase 1	PPT1	P50897	5538	PPT1	0.482064	0.000112	0.00421
Clinically diagnosed AD dementia versus CN	seq.13940.19	13940-19	Protein	Gamma-interferon-inducible protein 16:Isoform 2, Hematopoietic expression, interferon-inducible nature, and nuclear localization 1	IP16:HIN 1	Q16666	3428	IFI16	0.350787	0.000113	0.00426
Clinically diagnosed AD dementia versus CN	seq.4258.15	4258-15	Protein	Proliferation-associated protein 2G4	PA2G4	Q9UQ80	5036	PA2G4	-0.91238	0.000116	0.00432
Clinically diagnosed AD dementia versus CN	seq.4874.3	4874-3	Protein	Angiogenin	Angiogenin	P03950	283	ANG	0.37241	0.000122	0.00455
Clinically diagnosed AD dementia versus CN	seq.3866.7	3866-7	Protein	Ribosome maturation protein SBDS	SBDS	Q9Y3A5	51119	SBDS	0.964265	0.00013	0.00482
Clinically diagnosed AD dementia versus CN	seq.13503.19	13503-19	Protein	PRA1 family protein 3	PRAF3	O75915	10550	ARL6IP5	-0.815742	0.000132	0.00486
Clinically diagnosed AD dementia versus CN	seq.11177.16	11177-16	Protein	Keratin, type II cytoskeletal 5	K2C5	P13647	3852	KRT5	-0.419942	0.000138	0.00504
Clinically diagnosed AD dementia versus CN	seq.23580.2	23580-2	Protein	Proline-rich protein 15	PRR15	Q8IV56	222171	PRR15	0.379375	0.000138	0.00504
Clinically diagnosed AD dementia versus CN	seq.21885.196	21885-196	Protein	Nucleolysin TIA-1 isoform p40	TIA1	P31483	7072	TIA1	-1.31353	0.00014	0.00507
Clinically diagnosed AD dementia versus CN	seq.9234.8	9234-8	Protein	Twisted gastrulation protein homolog 1	TWSG1	Q9GZX9	57045	TWSG1	0.375941	0.000145	0.00523
Clinically diagnosed AD dementia versus CN	seq.3585.54	3585-54	Protein	Basigin	BASI	P35613	682	BSG	0.364408	0.00015	0.00537
Clinically diagnosed AD dementia versus CN	seq.25256.23	25256-23	Protein	Elongation factor 1-alpha 1	EF-1-alpha-1	P68104	1915	EEF1A1	-1.12624	0.000153	0.00546
Clinically diagnosed AD dementia versus CN	seq.18435.40	18435-40	Protein	UBX domain-containing protein 2B	UBX2B	Q14CS0	137886	UBXN2B	0.566593	0.000154	0.00547
Clinically diagnosed AD dementia versus CN	seq.3347.9	3347-9	Protein	beta-adrenergic receptor kinase 1	BARK1	P25098	156	GRK2	-1.15532	0.00016	0.00566
Clinically diagnosed AD dementia versus CN	seq.24698.12	24698-12	Protein	Pre-mRNA-splicing factor 18	PRP18	Q99633	8559	PRPF18	0.426284	0.000164	0.00577
Clinically diagnosed AD dementia versus CN	seq.20133.1	20133-1	Protein	Melanoma-associated antigen 3	MAGE-3	P43357	4102	MAGEA3	-0.498889	0.000169	0.00593
Clinically diagnosed AD dementia versus CN	seq.24942.22	24942-22	Protein	Protein unc-13 homolog D	UN13D	Q70J99	201294	UNC13D	-0.808416	0.000175	0.00609
Clinically diagnosed AD dementia versus CN	seq.17726.3	17726-3	Protein	GTP-binding protein SAR1a	SAR1A	Q9NR31	56681	SAR1A	-0.870426	0.000175	0.00609
Clinically diagnosed AD dementia versus CN	seq.2751.16	2751-16	Protein	Azurocidin	Azurocidin	P20160	566	AZU1	0.395837	0.000178	0.00614
Clinically diagnosed AD dementia versus CN	seq.9090.9	9090-9	Protein	Synaptotagmin-like protein 4:Ca2+-dependent membrane-targeting module 1	SYTL4:C2 1	Q96C24	94121	SYTL4	-0.596631	0.000181	0.00623
Clinically diagnosed AD dementia versus CN	seq.13524.25	13524-25	Protein	Heparan-sulfate 6-O-sulfotransferase 2	H6ST2	Q96MM7	90161	HS6ST2	0.348429	0.000189	0.00645
Clinically diagnosed AD dementia versus CN	seq.2687.2	2687-2	Protein	Melanoma-derived growth regulatory protein	MIA	Q16674	8190	MIA	0.34865	0.00019	0.00646
Clinically diagnosed AD dementia versus CN	seq.6393.63	6393-63	Protein	Endoplasmin	Endoplasmin	P14625	7184	HSP90B1	0.484359	0.000191	0.00646
Clinically diagnosed AD dementia versus CN	seq.17697.2	17697-2	Protein	Esterase OVCA2	OVCA2	Q8WZ82	124641	OVCA2	-1.53609	0.000191	0.00646
Clinically diagnosed AD dementia versus CN	seq.3441.64	3441-64	Protein	Glycogen synthase kinase-3 alpha	GSK-3 alpha	P49840	2931	GSK3A	-1.77311	0.000196	0.00658
Clinically diagnosed AD dementia versus CN	seq.7769.29	7769-29	Protein	SH3 domain-binding protein 2	3BP2	P78314	6452	SH3BP2	0.421266	0.000205	0.00684
Clinically diagnosed AD dementia versus CN	seq.6612.90	6612-90	Protein	BRICHOS domain-containing protein 5	CP079	Q6PL45	283870	BRICD5	0.825542	0.000212	0.00704
Clinically diagnosed AD dementia versus CN	seq.23350.66	23350-66	Protein	Protein FAM118B	F118B	Q9BPY3	79607	FAM118B	0.892881	0.000216	0.00717
Clinically diagnosed AD dementia versus CN	seq.8048.9	8048-9	Protein	Ferritin, mitochondrial	FTMT	Q8N4E7	94033	FTMT	0.383746	0.00023	0.00759
Clinically diagnosed AD dementia versus CN	seq.12448.246	12448-246	Protein	Glycylpeptide N-tetradecanoyltransferase 1	NMT1	P30419	4836	NMT1	-0.891213	0.000234	0.00766
Clinically diagnosed AD dementia versus CN	seq.22037.47	22037-47	Protein	EF-hand domain-containing protein D2	EFHD2	Q96C19	79180	EFHD2	0.512371	0.000234	0.00766
Clinically diagnosed AD dementia versus CN	seq.15640.54	15640-54	Protein	Transgelin	TAGL	Q01995	6876	TAGLN	0.379444	0.000235	0.00766
Clinically diagnosed AD dementia versus CN	seq.21781.9	21781-9	Protein	Aspartoacylase-2	ACY3	Q96HD9	91703	ACY3	0.397304	0.000244	0.00789
Clinically diagnosed AD dementia versus CN	seq.5013.2	5013-2	Protein	Chloride intracellular channel protein 1	NCC27	O00299	1192	CLIC1	-0.626975	0.000245	0.0079
Clinically diagnosed AD dementia versus CN	seq.12641.3	12641-3	Protein	Type II inositol 1,4,5-trisphosphate 5-phosphatase	I5P2	P32019	3633	INPP5B	-0.83751	0.000257	0.00824
Clinically diagnosed AD dementia versus CN	seq.12599.10	12599-10	Protein	Fermitin family homolog 3	URP2	Q86UX7	83706	FERMT3	-0.655556	0.000258	0.00824
Clinically diagnosed AD dementia versus CN	seq.5496.49	5496-49	Protein	Spondin-1	Spondin-1	Q9HCB6	10418	SPON1	0.383151	0.000259	0.00824
Clinically diagnosed AD dementia versus CN	seq.20936.8	20936-8	Protein	Putative deoxyribonuclease TATDN3	TATD3	Q17R31	128387	TATDN3	0.533166	0.00027	0.00851
Clinically diagnosed AD dementia versus CN	seq.21827.7	21827-7	Protein	Rho-related GTP-binding protein RhoQ	RHOQ	P17081	23433	RHOQ	-0.870861	0.00027	0.00851
Clinically diagnosed AD dementia versus CN	seq.23395.5	23395-5	Protein	KH domain-containing, RNA-binding, signal transduction-associated protein 2	KHDR2	Q5VWX1	202559	KHDRBS2	0.765538	0.000295	0.00926
Clinically diagnosed AD dementia versus CN	seq.15433.4	15433-4	Protein	Proto-oncogene tyrosine-protein kinase Src	p60-Src	P12931	6714	SRC	-0.865171	0.000296	0.00927
Clinically diagnosed AD dementia versus CN	seq.12689.56	12689-56	Protein	Actin-related protein 2/3 complex subunit 1B	ARC1B	O15143	10095	ARPC1B	-0.525066	0.00031	0.00958
Clinically diagnosed AD dementia versus CN	seq.5669.26	5669-26	Protein	Signal-regulatory protein beta-2	SIRB2	Q5JXA9	284759	SIRPB2	0.37479	0.00031	0.00958
Clinically diagnosed AD dementia versus CN	seq.6294.11	6294-11	Protein	B melanoma antigen 2	BAGE2	Q86Y30	85319	BAGE2	0.370845	0.00031	0.00958
Clinically diagnosed AD dementia versus CN	seq.9202.309	9202-309	Protein	ATP synthase subunit O, mitochondrial	ATPO	P48047	539	ATP5PO	-0.503619	0.000315	0.00967
Clinically diagnosed AD dementia versus CN	seq.8954.30	8954-30	Protein	Mitogen-activated protein kinase kinase kinase kinase 1	M4K1	Q92918	11184	MAP4K1	-0.516834	0.000318	0.00974
Clinically diagnosed AD dementia versus CN	seq.9064.12	9064-12	Protein	RING finger protein 215:Cytoplasmic domain	RN215:CD	Q9Y6U7	200312	RNF215	0.598228	0.00032	0.00975
Clinically diagnosed AD dementia versus CN	seq.13731.14	13731-14	Protein	Complement component C7	C7	P10643	730	C7	0.340627	0.000321	0.00975
Clinically diagnosed AD dementia versus CN	seq.18950.13	18950-13	Protein	Ras-related C3 botulinum toxin substrate 2	RAC2	P15153	5880	RAC2	-0.766157	0.000327	0.00989
Clinically diagnosed AD dementia versus CN	seq.24637.3	24637-3	Protein	Transcription elongation factor A protein-like 5	TCAL5	Q5H9L2	340543	TCEAL5	0.589849	0.000334	0.0101
Clinically diagnosed AD dementia versus CN	seq.8973.23	8973-23	Protein	Fc receptor-like protein 4:Extracellular domain	FCRL4:ECD	Q96PJ5	83417	FCRL4	-0.347284	0.000338	0.0101
Clinically diagnosed AD dementia versus CN	seq.18917.53	18917-53	Protein	Pancreatic alpha-amylase	Pancreatic alpha-amylase	P04746	279	AMY2A	0.319244	0.000338	0.0101
Clinically diagnosed AD dementia versus CN	seq.16883.57	16883-57	Protein	Ras-related protein Rab-4A	RAB4A	P20338	5867	RAB4A	0.851375	0.000349	0.0103
Clinically diagnosed AD dementia versus CN	seq.9756.6	9756-6	Protein	Transgelin	TAGL	Q01995	6876	TAGLN	0.365165	0.000349	0.0103
Clinically diagnosed AD dementia versus CN	seq.10870.32	10870-32	Protein	Spastin:Microtubule interacting and trafficking domain	Spastin:MIT	Q9UBP0	6683	SPAST	-1.24513	0.000351	0.0104
Clinically diagnosed AD dementia versus CN	seq.24459.15	24459-15	Protein	Coatomer subunit beta'	COPB2	P35606	9276	COPB2	-0.871993	0.000356	0.0104
Clinically diagnosed AD dementia versus CN	seq.3903.49	3903-49	Protein	Sorting nexin-4	Sorting nexin 4	O95219	8723	SNX4	-1.07672	0.000356	0.0104
Clinically diagnosed AD dementia versus CN	seq.5604.30	5604-30	Protein	Heparanase	HPSE	Q9Y251	10855	HPSE	0.341248	0.000356	0.0104
Clinically diagnosed AD dementia versus CN	seq.11368.32	11368-32	Protein	Adenylate kinase 2, mitochondrial	KAD2	P54819	204	AK2	-0.692951	0.000365	0.0106
Clinically diagnosed AD dementia versus CN	seq.11614.29	11614-29	Protein	Enhancer of rudimentary homolog	ERH	P84090	2079	ERH	0.431445	0.000366	0.0106
Clinically diagnosed AD dementia versus CN	seq.17320.19	17320-19	Protein	L-aminoadipate-semialdehyde dehydrogenase-phosphopantetheinyl transferase	ADPPT	Q9NRN7	60496	AASDHPPT	-1.3584	0.000369	0.0106
Clinically diagnosed AD dementia versus CN	seq.17739.1	17739-1	Protein	Hydroxyacyl-coenzyme A dehydrogenase, mitochondrial	HCDH	Q16836	3033	HADH	-0.856566	0.000375	0.0108
Clinically diagnosed AD dementia versus CN	seq.17742.2	17742-2	Protein	Ras-related protein R-Ras	RRAS	P10301	6237	RRAS	-0.477289	0.000384	0.011
Clinically diagnosed AD dementia versus CN	seq.11226.16	11226-16	Protein	Ubiquitin-protein ligase E3A	UBE3A	Q05086	7337	UBE3A	0.478226	0.000385	0.011
Clinically diagnosed AD dementia versus CN	seq.3313.21	3313-21	Protein	Ficolin-2	FCN2	Q15485	2220	FCN2	-0.339732	0.000394	0.0112
Clinically diagnosed AD dementia versus CN	seq.24457.12	24457-12	Protein	USF2	USF2	Q15853	7392	USF2	0.342823	0.000395	0.0112
Clinically diagnosed AD dementia versus CN	seq.5456.59	5456-59	Protein	Beta-Ala-His dipeptidase	CNDP1	Q96KN2	84735	CNDP1	-0.556051	0.000407	0.0115
Clinically diagnosed AD dementia versus CN	seq.7215.18	7215-18	Protein	NADH-cytochrome b5 reductase 3	NADH-cytochrome b5 reductase	P00387	1727	CYB5R3	-0.335263	0.000409	0.0115
Clinically diagnosed AD dementia versus CN	seq.15608.5	15608-5	Protein	Ribosomal protein S6 kinase beta-1	KS6B1	P23443	6198	RPS6KB1	0.397754	0.000413	0.0115
Clinically diagnosed AD dementia versus CN	seq.9288.7	9288-7	Protein	Peptidyl-prolyl cis-trans isomerase FKBP7	FKBP7	Q9Y680	51661	FKBP7	0.558184	0.000416	0.0116
Clinically diagnosed AD dementia versus CN	seq.4306.4	4306-4	Protein	Transketolase	Transketolase	P29401	7086	TKT	-1.07935	0.000417	0.0116
Clinically diagnosed AD dementia versus CN	seq.20934.13	20934-13	Protein	Ras-related protein Rab-24	RAB24	Q969Q5	53917	RAB24	0.97796	0.000421	0.0116
Clinically diagnosed AD dementia versus CN	seq.13963.7	13963-7	Protein	Toll-interacting protein	tollip	Q9H0E2	54472	TOLLIP	-1.0259	0.000439	0.012
Clinically diagnosed AD dementia versus CN	seq.11449.22	11449-22	Protein	F-actin-capping protein subunit alpha-1	CAZA1	P52907	829	CAPZA1	-0.752993	0.000439	0.012
Clinically diagnosed AD dementia versus CN	seq.15321.8	15321-8	Protein	Complexin-2	CPLX2	Q6PUV4	10814	CPLX2	0.323347	0.000449	0.0122
Clinically diagnosed AD dementia versus CN	seq.23392.41	23392-41	Protein	Pleckstrin homology domain-containing family A member 3	PKHA3	Q9HB20	65977	PLEKHA3	0.598651	0.000457	0.0124
Clinically diagnosed AD dementia versus CN	seq.11232.46	11232-46	Protein	Transcobalamin-1	Holo-TC I	P20061	6947	TCN1	0.378161	0.000459	0.0124
Clinically diagnosed AD dementia versus CN	seq.5250.53	5250-53	Protein	Inosine-5'-monophosphate dehydrogenase 2	IMDH2	P12268	3615	IMPDH2	0.563082	0.000461	0.0124
Clinically diagnosed AD dementia versus CN	seq.11664.32	11664-32	Protein	ADP-ribosylation factor GTPase-activating protein 2	ARFG2	Q8N6H7	84364	ARFGAP2	-1.12077	0.000461	0.0124
Clinically diagnosed AD dementia versus CN	seq.18162.167	18162-167	Protein	Interleukin-1 receptor-associated kinase 4	IRAK4	Q9NWZ3	51135	IRAK4	0.699894	0.000462	0.0124
Clinically diagnosed AD dementia versus CN	seq.12424.107	12424-107	Protein	Thymocyte nuclear protein 1	THYN1	Q9P016	29087	THYN1	0.37629	0.000472	0.0126
Clinically diagnosed AD dementia versus CN	seq.18175.65	18175-65	Protein	Synaptic vesicle membrane protein VAT-1 homolog	VAT1	Q99536	10493	VAT1	-0.35656	0.000474	0.0126
Clinically diagnosed AD dementia versus CN	seq.10041.3	10041-3	Protein	Hepatocyte nuclear factor 4-alpha	HNF4A	P41235	3172	HNF4A	0.326756	0.000478	0.0127
Clinically diagnosed AD dementia versus CN	seq.23300.3	23300-3	Protein	RNA-binding protein with multiple splicing 2	RBPS2	Q6ZRY4	348093	RBPMS2	-0.844121	0.000492	0.013
Clinically diagnosed AD dementia versus CN	seq.21166.1	21166-1	Protein	Carboxy-terminal domain RNA polymerase II polypeptide A small phosphatase 1	CTDS1	Q9GZU7	58190	CTDSP1	-0.989334	0.000496	0.0131
Clinically diagnosed AD dementia versus CN	seq.3593.72	3593-72	Protein	Caspase-3	Caspase-3	P42574	836	CASP3	-0.927922	0.000526	0.0138
Clinically diagnosed AD dementia versus CN	seq.21322.60	21322-60	Protein	Transcription initiation factor IIE subunit beta	T2EB	P29084	2961	GTF2E2	0.371392	0.000527	0.0138
Clinically diagnosed AD dementia versus CN	seq.19802.22	19802-22	Protein	Receptor-binding cancer antigen expressed on SiSo cells	RCAS1	O00559	9166	EBAG9	0.697954	0.000553	0.0144
Clinically diagnosed AD dementia versus CN	seq.6280.11	6280-11	Protein	Protocadherin-8	PCDH8	O95206	5100	PCDH8	0.50016	0.000555	0.0144
Clinically diagnosed AD dementia versus CN	seq.5715.4	5715-4	Protein	Protein ABHD14A	ABHEA	Q9BUJ0	25864	ABHD14A	0.387816	0.000563	0.0146
Clinically diagnosed AD dementia versus CN	seq.3232.28	3232-28	Protein	Tartrate-resistant acid phosphatase type 5	TrATPase	P13686	54	ACP5	0.338021	0.000573	0.0148
Clinically diagnosed AD dementia versus CN	seq.24898.39	24898-39	Protein	Sec1 family domain-containing protein 1	SCFD1	Q8WVM8	23256	SCFD1	-0.416258	0.00059	0.0151
Clinically diagnosed AD dementia versus CN	seq.23625.44	23625-44	Protein	Uncharacterized protein KIAA1143	K1143	Q96AT1	57456	KIAA1143	0.387927	0.000595	0.0152
Clinically diagnosed AD dementia versus CN	seq.12578.13	12578-13	Protein	ADP-ribosylation factor 3	ARF3	P61204	377	ARF3	-0.463091	0.00063	0.016
Clinically diagnosed AD dementia versus CN	seq.7870.8	7870-8	Protein	Beta-Ala-His dipeptidase	CNDP1	Q96KN2	84735	CNDP1	-0.530265	0.000653	0.0166
Clinically diagnosed AD dementia versus CN	seq.11293.14	11293-14	Protein	Leucine-rich repeat neuronal protein 1:Cytoplasmic domain	LRRN1:CD	Q6UXK5	57633	LRRN1	0.346687	0.000654	0.0166
Clinically diagnosed AD dementia versus CN	seq.10880.38	10880-38	Protein	Protein FAM163B	F163B	P0C2L3	642968	FAM163B	-0.43659	0.00066	0.0167
Clinically diagnosed AD dementia versus CN	seq.3827.22	3827-22	Protein	Serine/threonine-protein kinase PAK 6	PAK6	Q9NQU5	106821730	PAK6	-0.740757	0.000671	0.0169
Clinically diagnosed AD dementia versus CN	seq.21958.4	21958-4	Protein	Active breakpoint cluster region-related protein	ABR	Q12979	29	ABR	0.69251	0.000678	0.0169
Clinically diagnosed AD dementia versus CN	seq.24707.6	24707-6	Protein	Uncharacterized protein CXorf38	CX038	Q8TB03	159013	CXorf38	0.360552	0.000678	0.0169
Clinically diagnosed AD dementia versus CN	seq.24694.158	24694-158	Protein	Ezrin-radixin-moesin-binding phosphoprotein 50	NHERF	O14745	9368	SLC9A3R1	-0.779173	0.000685	0.017
Clinically diagnosed AD dementia versus CN	seq.11817.1	11817-1	Protein	Ribosomal protein S6 kinase beta-1	KS6B1	P23443	6198	RPS6KB1	0.742697	0.000695	0.0172
Clinically diagnosed AD dementia versus CN	seq.22381.1	22381-1	Protein	Endoribonuclease LACTB2	LACB2	Q53H82	51110	LACTB2	-1.01176	0.0007	0.0173
Clinically diagnosed AD dementia versus CN	seq.17775.8	17775-8	Protein	Transgelin-3	TAGL3	Q9UI15	29114	TAGLN3	0.409746	0.00073	0.018
Clinically diagnosed AD dementia versus CN	seq.12438.127	12438-127	Protein	DNA-3-methyladenine glycosylase	3MG	P29372	4350	MPG	0.327524	0.000744	0.0183
Clinically diagnosed AD dementia versus CN	seq.12351.25	12351-25	Protein	Signal transducer and activator of transcription 1-alpha/beta	STAT1	P42224	6772	STAT1	-0.781042	0.000751	0.0184
Clinically diagnosed AD dementia versus CN	seq.20137.49	20137-49	Protein	Heterogeneous nuclear ribonucleoprotein A1	ROA1	P09651	3178	HNRNPA1	0.48534	0.000763	0.0186
Clinically diagnosed AD dementia versus CN	seq.14150.7	14150-7	Protein	Interleukin-36 alpha	IL-1F6	Q9UHA7	27179	IL36A	0.35181	0.000766	0.0186
Clinically diagnosed AD dementia versus CN	seq.25264.102	25264-102	Protein	SHIP	SHIP	Q92835	3635	INPP5D	0.528797	0.000774	0.0187
Clinically diagnosed AD dementia versus CN	seq.24211.25	24211-25	Protein	Hydroxymethylglutaryl-CoA lyase, mitochondrial	HMGCL	P35914	3155	HMGCL	-0.705754	0.000777	0.0187
Clinically diagnosed AD dementia versus CN	seq.3179.51	3179-51	Protein	Lysosomal protective protein	Cathepsin A	P10619	5476	CTSA	0.314295	0.00078	0.0188
Clinically diagnosed AD dementia versus CN	seq.2987.37	2987-37	Protein	Histone H1.2	Histone H1.2	P16403	3006	H1-2	0.295689	0.000785	0.0188
Clinically diagnosed AD dementia versus CN	seq.23560.154	23560-154	Protein	Centrosomal protein of 41 kDa	CEP41	Q9BYV8	95681	CEP41	-0.747534	0.000789	0.0188
Clinically diagnosed AD dementia versus CN	seq.4569.52	4569-52	Protein	VPS10 domain-containing receptor SorCS2	SORC2	Q96PQ0	57537	SORCS2	0.31296	0.000791	0.0188
Clinically diagnosed AD dementia versus CN	seq.3633.70	3633-70	Protein	Nidogen-2	NID2	Q14112	22795	NID2	0.293895	0.0008	0.019
Clinically diagnosed AD dementia versus CN	seq.8307.47	8307-47	Protein	UPF0696 protein C11orf68	CK068	Q9H3H3	83638	C11orf68	-1.1799	0.000807	0.0191
Clinically diagnosed AD dementia versus CN	seq.18868.7	18868-7	Protein	Chromobox protein homolog 3	CBX3	Q13185	11335	CBX3	0.367693	0.000819	0.0193
Clinically diagnosed AD dementia versus CN	seq.11211.7	11211-7	Protein	Tubulin-specific chaperone E	TBCE	Q15813	6905	TBCE	-0.993089	0.000825	0.0194
Clinically diagnosed AD dementia versus CN	seq.3213.65	3213-65	Protein	Nidogen-1	Nidogen	P14543	4811	NID1	0.301358	0.000839	0.0197
Clinically diagnosed AD dementia versus CN	seq.21406.25	21406-25	Protein	Mitogen-activated protein kinase kinase kinase 11	M3K11	Q16584	4296	MAP3K11	-0.314667	0.000847	0.0198
Clinically diagnosed AD dementia versus CN	seq.4188.1	4188-1	Protein	Aflatoxin B1 aldehyde reductase member 2	Aflatoxin B1 aldehyde reductase	O43488	8574	AKR7A2	-0.858626	0.000865	0.0202
Clinically diagnosed AD dementia versus CN	seq.21786.25	21786-25	Protein	Cyclin-dependent kinase-like 2	CDKL2	Q92772	8999	CDKL2	0.678951	0.000879	0.0204
Clinically diagnosed AD dementia versus CN	seq.25299.11	25299-11	Protein	Nuclear receptor coactivator 7	NCOA7	Q8NI08	135112	NCOA7	0.607434	0.000885	0.0205
Clinically diagnosed AD dementia versus CN	seq.9758.17	9758-17	Protein	40S ribosomal protein S4, X isoform	RS4X	P62701	6191	RPS4X	0.521961	0.000894	0.0206
Clinically diagnosed AD dementia versus CN	seq.17383.4	17383-4	Protein	StAR-related lipid transfer protein 5	STAR5	Q9NSY2	80765	STARD5	0.430337	0.000895	0.0206
Clinically diagnosed AD dementia versus CN	seq.8264.43	8264-43	Protein	Delta-like protein 1	DLL1	O00548	28514	DLL1	0.328907	0.000897	0.0206
Clinically diagnosed AD dementia versus CN	seq.12432.23	12432-23	Protein	Calcyclin-binding protein	CYBP	Q9HB71	27101	CACYBP	-1.03546	0.00091	0.0208
Clinically diagnosed AD dementia versus CN	seq.8597.1	8597-1	Protein	Transmembrane protein 9:Cytoplasmic domain	TMEM9:CD	Q9P0T7	252839	TMEM9	0.326768	0.000914	0.0208
Clinically diagnosed AD dementia versus CN	seq.4394.71	4394-71	Protein	Fibroblast growth factor 8 isoform A	FGF-8A	P55075	2253	FGF8	0.43392	0.000945	0.0214
Clinically diagnosed AD dementia versus CN	seq.11421.10	11421-10	Protein	EH domain-containing protein 4	EHD4	Q9H223	30844	EHD4	0.54814	0.000955	0.0216
Clinically diagnosed AD dementia versus CN	seq.9531.24	9531-24	Protein	Leukocyte-specific transcript 1 protein	LST1	O00453	7940	LST1	0.369837	0.000959	0.0216
Clinically diagnosed AD dementia versus CN	seq.7245.2	7245-2	Protein	CUGBP Elav-like family member 2	CELF2	O95319	10659	CELF2	0.290486	0.000966	0.0217
Clinically diagnosed AD dementia versus CN	seq.19488.1	19488-1	Protein	Programmed cell death protein 6	PDCD6	O75340	10016	PDCD6	0.354896	0.000977	0.0219
Clinically diagnosed AD dementia versus CN	seq.12786.61	12786-61	Protein	Glycerophosphocholine phosphodiesterase GPCPD1	GDE5	Q9NPB8	56261	GPCPD1	0.446288	0.000985	0.022
Clinically diagnosed AD dementia versus CN	seq.4978.54	4978-54	Protein	Drebrin-like protein	DBNL	Q9UJU6	28988	DBNL	0.456548	0.000992	0.0221
Clinically diagnosed AD dementia versus CN	seq.23261.27	23261-27	Protein	Uncharacterized protein C1orf50	CA050	Q9BV19	79078	C1orf50	-0.459835	0.000998	0.0222
Clinically diagnosed AD dementia versus CN	seq.25083.26	25083-26	Protein	Protein diaphanous homolog 1	Diaphanous-related formin-1	O60610	1729	DIAPH1	0.587191	0.00102	0.0226
Clinically diagnosed AD dementia versus CN	seq.2333.72	2333-72	Protein	Transforming growth factor beta-1	TGF-b1	P01137	7040	TGFB1	0.321243	0.00103	0.0227
Clinically diagnosed AD dementia versus CN	seq.3412.7	3412-7	Protein	Apoptosis regulator Bcl-2	Bcl-2	P10415	596	BCL2	0.368319	0.00104	0.0229
Clinically diagnosed AD dementia versus CN	seq.19379.154	19379-154	Protein	Ras-related protein Rab-3D	RAB3D	O95716	9545	RAB3D	1.04396	0.00108	0.0237
Clinically diagnosed AD dementia versus CN	seq.4547.59	4547-59	Protein	Leucine-rich repeat transmembrane protein FLRT1	FLRT1	Q9NZU1	23769	FLRT1	0.388756	0.00109	0.0238
Clinically diagnosed AD dementia versus CN	seq.16621.77	16621-77	Protein	NAD(P)H-hydrate epimerase	AIBP	Q8NCW5	128240	NAXE	0.560038	0.0011	0.024
Clinically diagnosed AD dementia versus CN	seq.14090.23	14090-23	Protein	Differentially expressed in FDCP 6 homolog	DEFI6	Q9H4E7	50619	DEF6	0.595324	0.0011	0.024
Clinically diagnosed AD dementia versus CN	seq.24697.48	24697-48	Protein	Heterogeneous nuclear ribonucleoprotein A0	ROA0	Q13151	10949	HNRNPA0	0.482859	0.00111	0.024
Clinically diagnosed AD dementia versus CN	seq.4292.5	4292-5	Protein	Alpha-soluble NSF attachment protein	SNAA	P54920	8775	NAPA	-1.28936	0.00113	0.0244
Clinically diagnosed AD dementia versus CN	seq.5852.6	5852-6	Protein	Protein S100-A12	S100A12	P80511	6283	S100A12	0.282681	0.00114	0.0245
Clinically diagnosed AD dementia versus CN	seq.4337.49	4337-49	Protein	C-reactive protein	CRP	P02741	1401	CRP	-0.286635	0.00119	0.0256
Clinically diagnosed AD dementia versus CN	seq.15323.112	15323-112	Protein	Protein argonaute-3	AGO3	Q9H9G7	192669	AGO3	0.438312	0.00122	0.026
Clinically diagnosed AD dementia versus CN	seq.23278.13	23278-13	Protein	39S ribosomal protein L12, mitochondrial	39S ribosomal protein L12	P52815	6182	MRPL12	-0.808834	0.00122	0.026
Clinically diagnosed AD dementia versus CN	seq.18883.4	18883-4	Protein	Destrin	DEST	P60981	11034	DSTN	-0.52753	0.00122	0.026
Clinically diagnosed AD dementia versus CN	seq.10668.5	10668-5	Protein	Syntaxin-4	STX4	Q12846	6810	STX4	-0.635977	0.00122	0.026
Clinically diagnosed AD dementia versus CN	seq.10606.34	10606-34	Protein	Torsin-1A-interacting protein 1:Perinuclear domain	TOIP1:Perinuclear	Q5JTV8	26092	TOR1AIP1	0.417768	0.00123	0.026
Clinically diagnosed AD dementia versus CN	seq.15556.49	15556-49	Protein	Alpha-amylase 2B	Alpha-amylase 2B	P19961	280	AMY2B	0.287729	0.00123	0.026
Clinically diagnosed AD dementia versus CN	seq.10015.119	10015-119	Protein	Voltage-gated potassium channel subunit beta-2	KCAB2	Q13303	8514	KCNAB2	0.346746	0.00125	0.0263
Clinically diagnosed AD dementia versus CN	seq.15325.14	15325-14	Protein	Neuromodulin	NEUM	P17677	2596	GAP43	-0.836912	0.00125	0.0263
Clinically diagnosed AD dementia versus CN	seq.14146.92	14146-92	Protein	Histone H3.1	H31	P68431	8350	H3C1	0.288165	0.0013	0.0271
Clinically diagnosed AD dementia versus CN	seq.12478.15	12478-15	Protein	60S ribosomal protein L30	RL30	P62888	6156	RPL30	0.317677	0.0013	0.0272
Clinically diagnosed AD dementia versus CN	seq.8854.59	8854-59	Protein	Ribonucleoside-diphosphate reductase subunit M2 B	RIR2B	Q7LG56	50484	RRM2B	0.410626	0.00132	0.0274
Clinically diagnosed AD dementia versus CN	seq.3285.23	3285-23	Protein	Complement C1r subcomponent	C1r	P00736	715	C1R	-0.311014	0.00132	0.0275
Clinically diagnosed AD dementia versus CN	seq.13959.7	13959-7	Protein	Cytosol aminopeptidase	LAP	P28838	51056	LAP3	-0.716015	0.00134	0.0278
Clinically diagnosed AD dementia versus CN	seq.18823.52	18823-52	Protein	Histone H2B type 3-B	H2B3B	Q8N257	128312	H2BU1	0.285039	0.00135	0.0278
Clinically diagnosed AD dementia versus CN	seq.6451.64	6451-64	Protein	Asporin	ASPN	Q9BXN1	54829	ASPN	0.289197	0.00136	0.028
Clinically diagnosed AD dementia versus CN	seq.5351.52	5351-52	Protein	Heterogeneous nuclear ribonucleoproteins A2/B1	hnRNP A2/B1	P22626	3181	HNRNPA2B1	0.348767	0.00138	0.0284
Clinically diagnosed AD dementia versus CN	seq.3049.61	3049-61	Protein	Trypsin-1	Trypsin	P07477	5644	PRSS1	0.297406	0.0014	0.0286
Clinically diagnosed AD dementia versus CN	seq.2622.18	2622-18	Protein	Heme oxygenase 2	HO-2	P30519	3163	HMOX2	0.284157	0.0014	0.0286
Clinically diagnosed AD dementia versus CN	seq.8841.65	8841-65	Protein	Cartilage intermediate layer protein 2	CILP2	Q8IUL8	148113	CILP2	-0.307306	0.0014	0.0286
Clinically diagnosed AD dementia versus CN	seq.17693.2	17693-2	Protein	Septin-6	Septin-6	Q14141	23157	SEPTIN6	-0.36817	0.00141	0.0286
Clinically diagnosed AD dementia versus CN	seq.13992.12	13992-12	Protein	Vesicle-fusing ATPase	NSF	P46459	4905	NSF	0.590048	0.00143	0.029
Clinically diagnosed AD dementia versus CN	seq.17347.80	17347-80	Protein	Axin interactor, dorsalization-associated protein	CA080	Q96BJ3	64853	AIDA	-0.719037	0.00143	0.029
Clinically diagnosed AD dementia versus CN	seq.3317.33	3317-33	Protein	Serine protease HTRA2, mitochondrial	HTRA2	O43464	27429	HTRA2	0.524106	0.00145	0.0291
Clinically diagnosed AD dementia versus CN	seq.21935.16	21935-16	Protein	Ubiquitin-conjugating enzyme E2 H	UBE2H	P62256	7328	UBE2H	0.397446	0.00145	0.0292
Clinically diagnosed AD dementia versus CN	seq.9385.4	9385-4	Protein	Lysosomal alpha-glucosidase	GAA	P10253	2548	GAA	0.282661	0.00148	0.0296
Clinically diagnosed AD dementia versus CN	seq.17821.20	17821-20	Protein	Glycylpeptide N-tetradecanoyltransferase 2	NMT2	O60551	9397	NMT2	0.696449	0.00149	0.0297
Clinically diagnosed AD dementia versus CN	seq.20960.47	20960-47	Protein	Far upstream element-binding protein 1	FUBP1	Q96AE4	8880	FUBP1	0.497202	0.00151	0.03
Clinically diagnosed AD dementia versus CN	seq.18405.117	18405-117	Protein	AP-1 complex subunit sigma-2	AP1S2	P56377	8905	AP1S2	-0.497828	0.00151	0.03
Clinically diagnosed AD dementia versus CN	seq.2746.56	2746-56	Protein	Cytokine receptor-like factor 2	TSLP R	Q9HC73	64109	CRLF2	0.391748	0.00152	0.0301
Clinically diagnosed AD dementia versus CN	seq.3685.53	3685-53	Protein	Membrane frizzled-related protein	MFRP	Q9BY79	83552	MFRP	0.29286	0.00152	0.0301
Clinically diagnosed AD dementia versus CN	seq.13655.34	13655-34	Protein	Nucleolin	Nucleolin	P19338	4691	NCL	0.327424	0.00154	0.0303
Clinically diagnosed AD dementia versus CN	seq.14144.3	14144-3	Protein	Histone H2A type 3	H2A3	Q7L7L0	92815	H2AW	0.282536	0.00157	0.0308
Clinically diagnosed AD dementia versus CN	seq.5315.22	5315-22	Protein	Troponin T, cardiac muscle	Troponin T	P45379	7139	TNNT2	0.312049	0.00157	0.0308
Clinically diagnosed AD dementia versus CN	seq.23659.2	23659-2	Protein	Basic leucine zipper and W2 domain-containing protein 2	BZW2	Q9Y6E2	28969	BZW2	-0.771656	0.00158	0.0308
Clinically diagnosed AD dementia versus CN	seq.2948.58	2948-58	Protein	Growth hormone receptor	Growth hormone receptor	P10912	2690	GHR	-0.294927	0.00163	0.0317
Clinically diagnosed AD dementia versus CN	seq.21323.2	21323-2	Protein	RWD domain-containing protein 1	RWDD1	Q9H446	51389	RWDD1	-0.961453	0.00163	0.0317
Clinically diagnosed AD dementia versus CN	seq.21765.10	21765-10	Protein	Ubiquitin carboxyl-terminal hydrolase CYLD	CYLD	Q9NQC7	1540	CYLD	0.548963	0.00165	0.0321
Clinically diagnosed AD dementia versus CN	seq.7695.106	7695-106	Protein	Sequestosome-1	SQSTM	Q13501	8878	SQSTM1	0.281076	0.00169	0.0326
Clinically diagnosed AD dementia versus CN	seq.4294.16	4294-16	Protein	Sphingosine kinase 1	Sphingosine kinase 1	Q9NYA1	8877	SPHK1	-0.831093	0.00174	0.0335
Clinically diagnosed AD dementia versus CN	seq.22402.12	22402-12	Protein	Histone H2A type 1-A	H2A1A	Q96QV6	221613	H2AC1	0.276517	0.00174	0.0335
Clinically diagnosed AD dementia versus CN	seq.13082.9	13082-9	Protein	Protein unc-45 homolog A	UN45A	Q9H3U1	55898	UNC45A	-0.687237	0.00175	0.0335
Clinically diagnosed AD dementia versus CN	seq.25092.32	25092-32	Protein	ATP-dependent RNA helicase DDX1	DDX1	Q92499	1653	DDX1	-0.423342	0.00175	0.0335
Clinically diagnosed AD dementia versus CN	seq.3210.1	3210-1	Protein	Methionine aminopeptidase 1	METAP1	P53582	23173	METAP1	0.525851	0.00175	0.0335
Clinically diagnosed AD dementia versus CN	seq.6941.11	6941-11	Protein	Sulfatase-modifying factor 1	SUMF1	Q8NBK3	285362	SUMF1	0.292429	0.00177	0.0337
Clinically diagnosed AD dementia versus CN	seq.24050.26	24050-26	Protein	Glycogen synthase kinase-3 beta	GSK-3 beta	P49841	2932	GSK3B	-0.997872	0.00178	0.0339
Clinically diagnosed AD dementia versus CN	seq.14675.20	14675-20	Protein	Eukaryotic translation initiation factor 4B	IF4B	P23588	1975	EIF4B	-1.00464	0.00181	0.0344
Clinically diagnosed AD dementia versus CN	seq.2843.13	2843-13	Protein	Kunitz-type protease inhibitor 2	SPINT2	O43291	10653	SPINT2	0.334361	0.00183	0.0344
Clinically diagnosed AD dementia versus CN	seq.14143.8	14143-8	Protein	Histone H2B type 2-E	H2B2E	Q16778	8349	H2BC21	0.276242	0.00183	0.0344
Clinically diagnosed AD dementia versus CN	seq.12466.7	12466-7	Protein	Heterogeneous nuclear ribonucleoprotein A1	ROA1	P09651	3178	HNRNPA1	0.692239	0.00184	0.0346
Clinically diagnosed AD dementia versus CN	seq.7065.1	7065-1	Protein	Protein G6b:Isoform A, Extracellular domain	G6B:ECD	O95866	80739	MPIG6B	-0.712711	0.00185	0.0346
Clinically diagnosed AD dementia versus CN	seq.7778.104	7778-104	Protein	Caspase recruitment domain-containing protein 19	BINCA	Q96LW7	84270	CARD19	0.348239	0.00186	0.0348
Clinically diagnosed AD dementia versus CN	seq.14097.86	14097-86	Protein	Carbohydrate sulfotransferase 15	ST4S6	Q7LFX5	51363	CHST15	0.324748	0.00187	0.0348
Clinically diagnosed AD dementia versus CN	seq.22403.13	22403-13	Protein	Histone H2B type 1-K	H2B1K	O60814	85236	H2BC12	0.275964	0.0019	0.0352
Clinically diagnosed AD dementia versus CN	seq.13639.101	13639-101	Protein	General vesicular transport factor p115	USO1	O60763	8615	USO1	0.918106	0.0019	0.0352
Clinically diagnosed AD dementia versus CN	seq.20546.71	20546-71	Protein	Reticulon-4 receptor-like 1	R4RL1	Q86UN2	146760	RTN4RL1	-0.305843	0.0019	0.0352
Clinically diagnosed AD dementia versus CN	seq.5621.64	5621-64	Protein	Thrombospondin type-1 domain-containing protein 1	THSD1	Q9NS62	55901	THSD1	-0.316315	0.00195	0.0358
Clinically diagnosed AD dementia versus CN	seq.20915.68	20915-68	Protein	Adaptin ear-binding coat-associated protein 2	NECP2	Q9NVZ3	55707	NECAP2	1.04194	0.00195	0.0358
Clinically diagnosed AD dementia versus CN	seq.19281.86	19281-86	Protein	Transcription factor MafG	MAFG	O15525	4097	MAFG	0.391152	0.00195	0.0358
Clinically diagnosed AD dementia versus CN	seq.4707.50	4707-50	Protein	14-3-3 protein eta	14-3-3 eta	Q04917	7533	YWHAH	-0.68447	0.00196	0.0358
Clinically diagnosed AD dementia versus CN	seq.24655.23	24655-23	Protein	RILP-like protein 2	RIPL2	Q969X0	196383	RILPL2	-0.735621	0.00197	0.0359
Clinically diagnosed AD dementia versus CN	seq.19590.46	19590-46	Protein	Pulmonary surfactant-associated protein D	SP-D	P35247	6441	SFTPD	-0.295136	0.00197	0.0359
Clinically diagnosed AD dementia versus CN	seq.11825.27	11825-27	Protein	Peroxisome proliferator-activated receptor gamma coactivator 1-alpha	PRGC1	Q9UBK2	10891	PPARGC1A	0.374448	0.00199	0.0361
Clinically diagnosed AD dementia versus CN	seq.12332.7	12332-7	Protein	Eukaryotic elongation factor 2 kinase	EF2K	O00418	29904	EEF2K	0.306417	0.002	0.0363
Clinically diagnosed AD dementia versus CN	seq.17150.8	17150-8	Protein	10 kDa heat shock protein, mitochondrial	HSP 10	P61604	3336	HSPE1	-0.775869	0.00204	0.0368
Clinically diagnosed AD dementia versus CN	seq.9845.33	9845-33	Protein	Protein DJ-1	PARK7	Q99497	11315	PARK7	0.427769	0.00204	0.0368
Clinically diagnosed AD dementia versus CN	seq.5476.66	5476-66	Protein	Protein kinase C gamma type	PKC-G	P05129	5582	PRKCG	0.301302	0.00204	0.0368
Clinically diagnosed AD dementia versus CN	seq.3397.7	3397-7	Protein	Tyrosine-protein phosphatase non-receptor type 11	SHP-2	Q06124	5781	PTPN11	-0.377878	0.00205	0.0368
Clinically diagnosed AD dementia versus CN	seq.20433.19	20433-19	Protein	39S ribosomal protein L1, mitochondrial	RM01	Q9BYD6	65008	MRPL1	-0.849111	0.00206	0.0368
Clinically diagnosed AD dementia versus CN	seq.19261.12	19261-12	Protein	Syntenin-2	SDCB2	Q9H190	27111	SDCBP2	0.278585	0.00208	0.0372
Clinically diagnosed AD dementia versus CN	seq.3860.7	3860-7	Protein	Proteasome subunit alpha type-6	PSA6	P60900	5687	PSMA6	0.358724	0.0021	0.0374
Clinically diagnosed AD dementia versus CN	seq.25094.9	25094-9	Protein	Acetyl-coenzyme A synthetase, cytoplasmic	ACSA	Q9NR19	55902	ACSS2	0.325114	0.00211	0.0375
Clinically diagnosed AD dementia versus CN	seq.17748.21	17748-21	Protein	Quinone oxidoreductase PIG3	QORX	Q53FA7	9540	TP53I3	0.458131	0.00213	0.0377
Clinically diagnosed AD dementia versus CN	seq.9102.28	9102-28	Protein	Protrudin:Cytoplasmic domain, region 2, isoform 5	ZFY27:CD region 2	Q5T4F4	118813	ZFYVE27	0.380373	0.00217	0.0383
Clinically diagnosed AD dementia versus CN	seq.16865.62	16865-62	Protein	TATA-binding protein-associated factor 2N	RBP56	Q92804	8148	TAF15	0.71593	0.00219	0.0386
Clinically diagnosed AD dementia versus CN	seq.17514.48	17514-48	Protein	Ras-related protein Rab-21	RAB21	Q9UL25	23011	RAB21	-0.557039	0.0022	0.0387
Clinically diagnosed AD dementia versus CN	seq.6256.9	6256-9	Protein	Lymphocyte antigen 6 complex locus protein G6c	LY66C	O95867	80740	LY6G6C	0.429935	0.00223	0.0392
Clinically diagnosed AD dementia versus CN	seq.3010.53	3010-53	Protein	Thymic stromal lymphopoietin	TSLP	Q969D9	85480	TSLP	0.313504	0.00231	0.0404
Clinically diagnosed AD dementia versus CN	seq.8235.48	8235-48	Protein	Secretogranin-1	SCG1	P05060	1114	CHGB	0.292741	0.00233	0.0407
Clinically diagnosed AD dementia versus CN	seq.12753.6	12753-6	Protein	Amyloid beta A4 precursor protein-binding family B member 2:Phosphotyrosine Interaction Domain 1	APBB2:PID 1	Q92870	323	APBB2	0.325514	0.00234	0.0407
Clinically diagnosed AD dementia versus CN	seq.12675.14	12675-14	Protein	Aspartate--tRNA ligase, cytoplasmic	SYDC	P14868	1615	DARS1	-0.540864	0.00236	0.041
Clinically diagnosed AD dementia versus CN	seq.9013.60	9013-60	Protein	Netrin-1	NET1	O95631	9423	NTN1	0.363513	0.0024	0.0416
Clinically diagnosed AD dementia versus CN	seq.5061.27	5061-27	Protein	ICOS ligand	B7-H2	O75144	23308	ICOSLG	0.279686	0.0024	0.0416
Clinically diagnosed AD dementia versus CN	seq.22405.61	22405-61	Protein	Phosphoenolpyruvate carboxykinase [GTP], mitochondrial	PCKGM	Q16822	5106	PCK2	0.294452	0.00241	0.0416
Clinically diagnosed AD dementia versus CN	seq.4284.18	4284-18	Protein	RNA-binding protein 39	RBM39	Q14498	9584	RBM39	0.285258	0.00243	0.0418
Clinically diagnosed AD dementia versus CN	seq.23341.16	23341-16	Protein	Meiotic recombination protein DMC1/LIM15 homolog	DMC1	Q14565	11144	DMC1	0.560557	0.00244	0.0419
Clinically diagnosed AD dementia versus CN	seq.12450.42	12450-42	Protein	Phosphomevalonate kinase	PMVK	Q15126	10654	PMVK	0.595822	0.00245	0.0419
Clinically diagnosed AD dementia versus CN	seq.7994.41	7994-41	Protein	ERO1-like protein beta	ERO1B	Q86YB8	56605	ERO1B	-0.382036	0.00249	0.0426
Clinically diagnosed AD dementia versus CN	seq.8468.19	8468-19	Protein	Prostate-specific antigen	PSA	P07288	354	KLK3	0.352968	0.00252	0.0429
Clinically diagnosed AD dementia versus CN	seq.21857.26	21857-26	Protein	Guanine nucleotide-binding protein subunit beta-2-like 1	RACK1	P63244	10399	RACK1	0.506882	0.00253	0.0429
Clinically diagnosed AD dementia versus CN	seq.2500.2	2500-2	Protein	Angiopoietin-4	Angiopoietin-4	Q9Y264	51378	ANGPT4	0.33176	0.00253	0.0429
Clinically diagnosed AD dementia versus CN	seq.8699.43	8699-43	Protein	Cysteine-rich motor neuron 1 protein:Cytoplasmic domain	CRIM1:CD	Q9NZV1	51232	CRIM1	0.272364	0.00255	0.0432
Clinically diagnosed AD dementia versus CN	seq.15503.20	15503-20	Protein	Left-right determination factor 2	Lefty-A	O00292	7044	LEFTY2	0.275033	0.00256	0.0432
Clinically diagnosed AD dementia versus CN	seq.5593.11	5593-11	Protein	Protein disulfide-isomerase A5	PDIA5	Q14554	10954	PDIA5	-0.54056	0.00258	0.0436
Clinically diagnosed AD dementia versus CN	seq.25308.8	25308-8	Protein	LIM domain kinase 1	LIMK1	P53667	3984	LIMK1	0.333681	0.00263	0.0443
Clinically diagnosed AD dementia versus CN	seq.13967.14	13967-14	Protein	Thioredoxin reductase 1, cytoplasmic	Thioredoxin reductase 1	Q16881	7296	TXNRD1	0.509933	0.00266	0.0445
Clinically diagnosed AD dementia versus CN	seq.3034.1	3034-1	Protein	Glial fibrillary acidic protein	GFAP	P14136	2670	GFAP	0.339173	0.00266	0.0445
Clinically diagnosed AD dementia versus CN	seq.8099.42	8099-42	Protein	Spondin-2	SPON2	Q9BUD6	10417	SPON2	0.286723	0.00267	0.0447
Clinically diagnosed AD dementia versus CN	seq.3872.2	3872-2	Protein	Translationally-controlled tumor protein	TCTP	P13693	7178	TPT1	-1.16875	0.0027	0.045
Clinically diagnosed AD dementia versus CN	seq.18382.109	18382-109	Protein	Catechol O-methyltransferase	Catechol O-methyltransferase	P21964	1312	COMT	0.277907	0.00271	0.0451
Clinically diagnosed AD dementia versus CN	seq.4392.54	4392-54	Protein	Fibroblast growth factor 12	FGF-12	P61328	2257	FGF12	0.275724	0.00272	0.0452
Clinically diagnosed AD dementia versus CN	seq.11130.158	11130-158	Protein	Voltage-dependent L-type calcium channel subunit beta-4	CACB4	O00305	785	CACNB4	0.437996	0.00276	0.0457
Clinically diagnosed AD dementia versus CN	seq.23312.16	23312-16	Protein	Rab-like protein 3	RABL3	Q5HYI8	285282	RABL3	-0.756776	0.00278	0.046
Clinically diagnosed AD dementia versus CN	seq.13499.30	13499-30	Protein	Coagulation Factor VIII	Coagulation Factor VIII	P00451	2157	F8	0.262353	0.0028	0.0461
Clinically diagnosed AD dementia versus CN	seq.16769.20	16769-20	Protein	Ras-related C3 botulinum toxin substrate 3	RAC3	P60763	5881	RAC3	0.613781	0.00284	0.0468
Clinically diagnosed AD dementia versus CN	seq.4911.49	4911-49	Protein	Glutathione S-transferase P	Glutathione S-transferase Pi	P09211	2950	GSTP1	-0.366438	0.00286	0.0469
Clinically diagnosed AD dementia versus CN	seq.6257.56	6257-56	Protein	Cell growth regulator with EF hand domain protein 1	CGRE1	Q99674	10669	CGREF1	0.271948	0.00287	0.0469
Clinically diagnosed AD dementia versus CN	seq.14107.1	14107-1	Protein	5-formyltetrahydrofolate cyclo-ligase	MTHFS	P49914	10588	MTHFS	-0.712448	0.00287	0.0469
Clinically diagnosed AD dementia versus CN	seq.5728.60	5728-60	Protein	Fc receptor-like protein 1	FCRL1	Q96LA6	115350	FCRL1	-0.272621	0.00287	0.0469
Clinically diagnosed AD dementia versus CN	seq.13976.9	13976-9	Protein	Rho guanine nucleotide exchange factor 1	ARHG1	Q92888	9138	ARHGEF1	0.512987	0.0029	0.0471
Clinically diagnosed AD dementia versus CN	seq.22980.37	22980-37	Protein	Homer protein homolog 1	HOME1	Q86YM7	9456	HOMER1	-0.290482	0.00291	0.0473
Clinically diagnosed AD dementia versus CN	seq.20087.3	20087-3	Protein	15 kDa selenoprotein	selenoprotein15	O60613	9403	SELENOF	0.376409	0.00293	0.0475
Clinically diagnosed AD dementia versus CN	seq.12334.25	12334-25	Protein	Serine hydroxymethyltransferase, cytosolic	cSHMT	P34896	6470	SHMT1	0.366074	0.00294	0.0475
Clinically diagnosed AD dementia versus CN	seq.12453.161	12453-161	Protein	Nuclear RNA export factor 1	NXF1	Q9UBU9	10482	NXF1	0.301627	0.003	0.0483
Clinically diagnosed AD dementia versus CN	seq.5490.53	5490-53	Protein	Testican-1	Testican-1	Q08629	6695	SPOCK1	0.676941	0.003	0.0483
Clinically diagnosed AD dementia versus CN	seq.21526.88	21526-88	Protein	Izumo sperm-egg fusion protein 1	sperm-egg fusion protein 1	Q8IYV9	284359	IZUMO1	0.265969	0.00301	0.0483
Clinically diagnosed AD dementia versus CN	seq.25278.41	25278-41	Protein	Rho GTPase-activating protein 6	RHG06	O43182	395	ARHGAP6	-0.52978	0.00303	0.0485
Clinically diagnosed AD dementia versus CN	seq.22974.25	22974-25	Protein	Histone H2B type 2-E	H2B2E	Q16778	8349	H2BC21	0.26191	0.00305	0.0486
Clinically diagnosed AD dementia versus CN	seq.12625.138	12625-138	Protein	Kelch-like protein 7	KLHL7	Q8IXQ5	55975	KLHL7	0.277777	0.00305	0.0486
Clinically diagnosed AD dementia versus CN	seq.11571.75	11571-75	Protein	NKG2-E type II integral membrane protein:Isoform E, Extracellular domain	NKG2E:ECD	Q07444	3823	KLRC3	-0.3909	0.00306	0.0486
Clinically diagnosed AD dementia versus CN	seq.3603.60	3603-60	Protein	C-type lectin domain family 7 member A	CLC7A	Q9BXN2	64581	CLEC7A	0.268669	0.00308	0.0489
Clinically diagnosed AD dementia versus CN	seq.6508.68	6508-68	Protein	Secretoglobin family 1D member 2	SG1D2	O95969	10647	SCGB1D2	0.592878	0.00311	0.0492
Clinically diagnosed AD dementia versus CN	seq.21705.33	21705-33	Protein	Meteorin-like protein	METRL	Q641Q3	284207	METRNL	0.289261	0.00314	0.0496
Clinically diagnosed AD dementia versus CN	seq.9487.60	9487-60	Protein	Somatoliberin	Growth hormone-releasing factor	P01286	2691	GHRH	-0.361198	0.00314	0.0496
Clinically diagnosed AD dementia versus CN	seq.24959.20	24959-20	Protein	Cytochrome b5 reductase 4	NB5R4	Q7L1T6	51167	CYB5R4	1.02138	0.00315	0.0496
Clinically diagnosed AD dementia versus CN	seq.24917.95	24917-95	Protein	DnaJ homolog subfamily C member 1	DNJC1	Q96KC8	64215	DNAJC1	-0.624662	0.00318	0.0498
Clinically diagnosed AD dementia versus CN	seq.25248.28	25248-28	Protein	Protein numb homolog	NUMB	P49757	8650	NUMB	-0.87179	0.00318	0.0498
Clinically diagnosed AD dementia versus CN	seq.7832.181	7832-181	Protein	Protein disulfide-isomerase A3	Protein disulfide isomerase A3	P30101	2923	PDIA3	-0.992802	0.00318	0.0498
Clinically diagnosed AD dementia versus CN	seq.5618.50	5618-50	Protein	Protein FAM3B	FAM3B	P58499	54097	FAM3B	0.273742	0.00319	0.0498
Clinically diagnosed AD dementia versus CN	seq.13118.5	13118-5	Protein	SPARC-related modular calcium-binding protein 1	SMOC1	Q9H4F8	64093	SMOC1	0.28393	0.0032	0.0498
Clinically diagnosed AD dementia versus CN	seq.7145.1	7145-1	Protein	Inter-alpha-trypsin inhibitor heavy chain H3	ITIH3	Q06033	3699	ITIH3	0.286254	0.00322	0.0501
Clinically diagnosed AD dementia versus CN	seq.9212.22	9212-22	Protein	Cathepsin F	CATF	Q9UBX1	8722	CTSF	0.270082	0.00324	0.0503
Clinically diagnosed AD dementia versus CN	seq.22484.17	22484-17	Protein	Casein kinase I isoform alpha-like	KC1AL	Q8N752	122011	CSNK1A1L	-0.267487	0.00328	0.0508
Clinically diagnosed AD dementia versus CN	seq.14756.29	14756-29	Protein	Intercellular adhesion molecule 2	sICAM-2	P13598	3384	ICAM2	-0.298763	0.00329	0.0508
Clinically diagnosed AD dementia versus CN	seq.4152.58	4152-58	Protein	Plasma kallikrein	Prekallikrein	P03952	3818	KLKB1	-0.289656	0.00331	0.051
Clinically diagnosed AD dementia versus CN	seq.14684.17	14684-17	Protein	Calpain-2 catalytic subunit	CAN2	P17655	824	CAPN2	-0.312746	0.00333	0.0513
Clinically diagnosed AD dementia versus CN	seq.11438.6	11438-6	Protein	DnaJ homolog subfamily B member 2	DNJB2	P25686	3300	DNAJB2	0.620281	0.00342	0.0525
Clinically diagnosed AD dementia versus CN	seq.3640.14	3640-14	Protein	alpha-2-macroglobulin receptor-associated protein	RAP	P30533	4043	LRPAP1	0.264247	0.00343	0.0525
Clinically diagnosed AD dementia versus CN	seq.19765.17	19765-17	Protein	C-type lectin domain family 4 member G	CLC4G	Q6UXB4	339390	CLEC4G	0.308237	0.00344	0.0526
Clinically diagnosed AD dementia versus CN	seq.23571.93	23571-93	Protein	Coiled-coil domain-containing protein 94	CCD94	Q9BW85	55702	YJU2	0.294348	0.00346	0.0526
Clinically diagnosed AD dementia versus CN	seq.6927.7	6927-7	Protein	Bifunctional heparan sulfate N-deacetylase/N-sulfotransferase 1	NDST1	P52848	3340	NDST1	-0.303181	0.00346	0.0526
Clinically diagnosed AD dementia versus CN	seq.22468.54	22468-54	Protein	Histone H2A type 1	Histone H2A type 1	P0C0S8	8329	H2AC11	0.259726	0.00346	0.0526
Clinically diagnosed AD dementia versus CN	seq.12408.333	12408-333	Protein	Ras-related protein Rab-22A	RB22A	Q9UL26	57403	RAB22A	0.570772	0.00347	0.0526
Clinically diagnosed AD dementia versus CN	seq.21235.11	21235-11	Protein	Importin subunit alpha-6	IMA6	O15131	3841	KPNA5	-0.678474	0.00355	0.0537
Clinically diagnosed AD dementia versus CN	seq.25265.8	25265-8	Protein	Formin-binding protein 1	FNBP1	Q96RU3	23048	FNBP1	0.296104	0.00358	0.054
Clinically diagnosed AD dementia versus CN	seq.8265.225	8265-225	Protein	Lamina-associated polypeptide 2, isoforms beta/gamma	LAP2B	P42167	7112	TMPO	0.281051	0.00358	0.054
Clinically diagnosed AD dementia versus CN	seq.3414.40	3414-40	Protein	Cytoplasmic tyrosine-protein kinase BMX	BMX	P51813	660	BMX	0.283204	0.0036	0.054
Clinically diagnosed AD dementia versus CN	seq.17750.8	17750-8	Protein	Ribonucleoside-diphosphate reductase subunit M2	RIR2	P31350	6241	RRM2	-0.4387	0.0036	0.054
Clinically diagnosed AD dementia versus CN	seq.8997.4	8997-4	Protein	Neuronal pentraxin receptor	NPTXR	O95502	23467	NPTXR	-0.285781	0.00361	0.054
Clinically diagnosed AD dementia versus CN	seq.22549.73	22549-73	Protein	RIP	RIP	Q13546	8737	RIPK1	-0.315216	0.00367	0.0547
Clinically diagnosed AD dementia versus CN	seq.18226.148	18226-148	Protein	Cytochrome c oxidase subunit 5A, mitochondrial	COX5A	P20674	9377	COX5A	-0.73643	0.00369	0.0548
Clinically diagnosed AD dementia versus CN	seq.6416.8	6416-8	Protein	Gastrokine-2	GKN2	Q86XP6	200504	GKN2	0.259215	0.00369	0.0548
Clinically diagnosed AD dementia versus CN	seq.25252.29	25252-29	Protein	MTSS1-like protein	MTSSL	Q765P7	92154	MTSS2	0.503265	0.00371	0.055
Clinically diagnosed AD dementia versus CN	seq.17764.108	17764-108	Protein	Rho-related GTP-binding protein RhoC	RHOC	P08134	389	RHOC	-0.533137	0.00371	0.055
Clinically diagnosed AD dementia versus CN	seq.15627.83	15627-83	Protein	RAC-alpha serine/threonine-protein kinase	PKB	P31749	207	AKT1	-0.961495	0.00374	0.0552
Clinically diagnosed AD dementia versus CN	seq.17343.6	17343-6	Protein	Syntaphilin	SNPH	O15079	9751	SNPH	0.263935	0.00374	0.0552
Clinically diagnosed AD dementia versus CN	seq.3392.68	3392-68	Protein	Protein kinase B gamma	PKB gamma	Q9Y243	10000	AKT3	-0.759344	0.00376	0.0553
Clinically diagnosed AD dementia versus CN	seq.10075.75	10075-75	Protein	Acyl-CoA-binding domain-containing protein 6	ACBD6	Q9BR61	84320	ACBD6	0.78148	0.00376	0.0553
Clinically diagnosed AD dementia versus CN	seq.23183.6	23183-6	Protein	E3 ubiquitin-protein ligase RNF31	RNF31	Q96EP0	55072	RNF31	0.308819	0.00378	0.0555
Clinically diagnosed AD dementia versus CN	seq.11617.1	11617-1	Protein	Integrin alpha-L	LFA-1 alpha-L chain	P20701	3683	ITGAL	0.306154	0.00381	0.0557
Clinically diagnosed AD dementia versus CN	seq.5225.50	5225-50	Protein	Casein kinase II 2-alpha:2-beta heterotetramer	CK2-A1:B	P68400|P67870	1457|1460	CSNK2A1|CSNK2B	-1.05062	0.00383	0.0559
Clinically diagnosed AD dementia versus CN	seq.20076.7	20076-7	Protein	Myeloid cell nuclear differentiation antigen	MNDA	P41218	4332	MNDA	0.256349	0.00389	0.0568
Clinically diagnosed AD dementia versus CN	seq.19187.21	19187-21	Protein	STAM-binding protein	STABP	O95630	10617	STAMBP	0.664119	0.00391	0.0568
Clinically diagnosed AD dementia versus CN	seq.14007.22	14007-22	Protein	Bifunctional 3'-phosphoadenosine 5'-phosphosulfate synthase 1	PAPS1	O43252	9061	PAPSS1	0.47275	0.00392	0.0568
Clinically diagnosed AD dementia versus CN	seq.11334.7	11334-7	Protein	Leukocyte immunoglobulin-like receptor subfamily B member 3	LIRB3	O75022	102725035	LILRB3	0.322292	0.00392	0.0568
Clinically diagnosed AD dementia versus CN	seq.2858.29	2858-29	Protein	Histone acetyltransferase type B catalytic subunit	Hat1	O14929	8520	HAT1	0.251271	0.00393	0.0568
Clinically diagnosed AD dementia versus CN	seq.2985.35	2985-35	Protein	Growth-regulated alpha protein	Gro-a	P09341	2919	CXCL1	0.271944	0.00396	0.0572
Clinically diagnosed AD dementia versus CN	seq.6485.59	6485-59	Protein	Immunoglobulin lambda-like polypeptide 1	IGLL1	P15814	3543	IGLL1	-0.266247	0.00398	0.0574
Clinically diagnosed AD dementia versus CN	seq.2998.53	2998-53	Protein	Junctional adhesion molecule C	JAM-C	Q9BX67	83700	JAM3	0.587861	0.00404	0.058
Clinically diagnosed AD dementia versus CN	seq.17199.43	17199-43	Protein	Hypoxia-inducible factor 1-alpha inhibitor	HIF1N	Q9NWT6	55662	HIF1AN	0.38155	0.00405	0.0581
Clinically diagnosed AD dementia versus CN	seq.5650.9	5650-9	Protein	Protein disulfide-isomerase A6	PDIA6	Q15084	10130	PDIA6	-0.822911	0.00408	0.0584
Clinically diagnosed AD dementia versus CN	seq.17672.184	17672-184	Protein	Gastric intrinsic factor	Gastric intrinsic factor	P27352	2694	CBLIF	-0.268067	0.00411	0.0588
Clinically diagnosed AD dementia versus CN	seq.25033.194	25033-194	Protein	Transitional endoplasmic reticulum ATPase	TER ATPase	P55072	7415	VCP	-0.531809	0.00414	0.0591
Clinically diagnosed AD dementia versus CN	seq.3066.12	3066-12	Protein	Galectin-3	Galectin-3	P17931	3958	LGALS3	0.27095	0.00416	0.0592
Clinically diagnosed AD dementia versus CN	seq.24674.22	24674-22	Protein	Egl nine homolog 2	EGLN2	Q96KS0	112398	EGLN2	0.325868	0.00426	0.0604
Clinically diagnosed AD dementia versus CN	seq.10737.96	10737-96	Protein	Leukocyte elastase inhibitor	Serpin B1	P30740	1992	SERPINB1	0.255446	0.00426	0.0604
Clinically diagnosed AD dementia versus CN	seq.5011.11	5011-11	Protein	Nicotinamide phosphoribosyltransferase	PBEF	P43490	10135	NAMPT	-0.267624	0.0043	0.0608
Clinically diagnosed AD dementia versus CN	seq.18166.4	18166-4	Protein	Rho-related GTP-binding protein RhoB	RHOB	P62745	388	RHOB	-0.32885	0.0043	0.0608
Clinically diagnosed AD dementia versus CN	seq.23320.11	23320-11	Protein	Multivesicular body subunit 12B	MB12B	Q9H7P6	89853	MVB12B	0.44865	0.00432	0.0609
Clinically diagnosed AD dementia versus CN	seq.19333.4	19333-4	Protein	Heterogeneous nuclear ribonucleoprotein K	hnRNP K	P61978	3190	HNRNPK	-0.60977	0.00441	0.062
Clinically diagnosed AD dementia versus CN	seq.8268.98	8268-98	Protein	Heparan sulfate glucosamine 3-O-sulfotransferase 3A1	HS3SA	Q9Y663	9955	HS3ST3A1	0.446842	0.00441	0.062
Clinically diagnosed AD dementia versus CN	seq.24689.9	24689-9	Protein	Polymerase I and transcript release factor	PTRF	Q6NZI2	284119	CAVIN1	-0.49242	0.00443	0.0621
Clinically diagnosed AD dementia versus CN	seq.9449.150	9449-150	Protein	C4b-binding protein alpha chain	C4b-binding protein alpha chain	P04003	722	C4BPA	0.263325	0.00446	0.0624
Clinically diagnosed AD dementia versus CN	seq.3892.21	3892-21	Protein	Mediator of RNA polymerase II transcription subunit 1	MED-1	Q15648	5469	MED1	0.274345	0.00449	0.0627
Clinically diagnosed AD dementia versus CN	seq.3322.52	3322-52	Protein	Leucine-rich repeats and immunoglobulin-like domains protein 3	LRIG3	Q6UXM1	121227	LRIG3	-0.317803	0.00452	0.063
Clinically diagnosed AD dementia versus CN	seq.7201.5	7201-5	Protein	Iron-sulfur cluster assembly enzyme ISCU, mitochondrial	ISCU	Q9H1K1	23479	ISCU	0.267629	0.00454	0.063
Clinically diagnosed AD dementia versus CN	seq.7792.58	7792-58	Protein	Coiled-coil domain-containing protein 90B, mitochondrial	CC90B	Q9GZT6	60492	CCDC90B	0.256943	0.00456	0.063
Clinically diagnosed AD dementia versus CN	seq.21815.7	21815-7	Protein	MOB kinase activator 3B	MOB3B	Q86TA1	79817	MOB3B	0.418612	0.00456	0.063
Clinically diagnosed AD dementia versus CN	seq.9742.59	9742-59	Protein	Spliceosome RNA helicase DDX39B	BAT1	Q13838	7919	DDX39B	0.288069	0.00457	0.063
Clinically diagnosed AD dementia versus CN	seq.8337.65	8337-65	Protein	Receptor-type tyrosine-protein phosphatase U	PTPRU	Q92729	10076	PTPRU	-0.292628	0.00457	0.063
Clinically diagnosed AD dementia versus CN	seq.17345.12	17345-12	Protein	Prostaglandin reductase 3	ZADH2	Q8N4Q0	284273	ZADH2	-0.822286	0.00458	0.0632
Clinically diagnosed AD dementia versus CN	seq.3583.54	3583-54	Protein	Arylsulfatase A	Arylsulfatase A	P15289	410	ARSA	0.296702	0.00461	0.0634
Clinically diagnosed AD dementia versus CN	seq.3727.35	3727-35	Protein	Peptide YY	PYY	P10082	5697	PYY	0.257919	0.00468	0.0642
Clinically diagnosed AD dementia versus CN	seq.4771.10	4771-10	Protein	Acid sphingomyelinase-like phosphodiesterase 3a	ASM3A	Q92484	10924	SMPDL3A	0.247818	0.0047	0.0644
Clinically diagnosed AD dementia versus CN	seq.9960.2	9960-2	Protein	TBC1 domain family member 5	TBCD5	Q92609	9779	TBC1D5	0.483068	0.00475	0.065
Clinically diagnosed AD dementia versus CN	seq.4963.19	4963-19	Protein	cAMP-regulated phosphoprotein 19	ARP19	P56211	10776	ARPP19	0.361901	0.00476	0.065
Clinically diagnosed AD dementia versus CN	seq.10088.37	10088-37	Protein	Adenine phosphoribosyltransferase	APT	P07741	353	APRT	-0.783863	0.0048	0.0654
Clinically diagnosed AD dementia versus CN	seq.3534.14	3534-14	Protein	CD40 ligand	CD40 ligand, soluble	P29965	959	CD40LG	0.312941	0.00483	0.0656
Clinically diagnosed AD dementia versus CN	seq.8310.6	8310-6	Protein	Zymogen granule protein 16 homolog B	U773	Q96DA0	124220	ZG16B	0.252703	0.00484	0.0657
Clinically diagnosed AD dementia versus CN	seq.8304.50	8304-50	Protein	Tumor necrosis factor receptor superfamily member 11B	OPG	O00300	4982	TNFRSF11B	0.275065	0.00489	0.0661
Clinically diagnosed AD dementia versus CN	seq.21351.8	21351-8	Protein	Glycyl t-RNA synthetase	Glycyl t-RNA synthetase	P41250	2617	GARS1	-0.933117	0.00489	0.0661
Clinically diagnosed AD dementia versus CN	seq.12414.31	12414-31	Protein	14-3-3 protein beta/alpha	14-3-3 protein beta/alpha	P31946	7529	YWHAB	-1.26719	0.00495	0.0668
Clinically diagnosed AD dementia versus CN	seq.6326.20	6326-20	Protein	Bone morphogenetic protein 4	BMP-4	P12644	652	BMP4	0.290156	0.00503	0.0677
Clinically diagnosed AD dementia versus CN	seq.10627.87	10627-87	Protein	Amyloid-like protein 2	APLP2	Q06481	334	APLP2	0.287669	0.00503	0.0677
Clinically diagnosed AD dementia versus CN	seq.11395.5	11395-5	Protein	Protein-tyrosine kinase 2-beta:4.1 protein, ezrin, radixin, moesin domain	FAK2:FERM	Q14289	2185	PTK2B	0.741604	0.00504	0.0677
Clinically diagnosed AD dementia versus CN	seq.17366.6	17366-6	Protein	DCN1-like protein 1	DCNL1	Q96GG9	54165	DCUN1D1	-0.254314	0.00506	0.0677
Clinically diagnosed AD dementia versus CN	seq.11207.3	11207-3	Protein	Macrophage scavenger receptor types I and II:Cytoplasmic domain	Macrophage scavenger receptor:CD	P21757	4481	MSR1	-0.419981	0.00508	0.0678
Clinically diagnosed AD dementia versus CN	seq.21999.61	21999-61	Protein	Nucleobindin-2	NUCB2	P80303	4925	NUCB2	0.298247	0.00508	0.0678
Clinically diagnosed AD dementia versus CN	seq.18824.7	18824-7	Protein	Eukaryotic initiation factor 4A-II	IF4A2	Q14240	1974	EIF4A2	-0.424387	0.00509	0.0679
Clinically diagnosed AD dementia versus CN	seq.9201.13	9201-13	Protein	Transgelin-2	Transgelin-2	P37802	8407	TAGLN2	-0.567773	0.00512	0.0681
Clinically diagnosed AD dementia versus CN	seq.2794.60	2794-60	Protein	Superoxide dismutase [Cu-Zn]	SOD	P00441	6647	SOD1	0.278184	0.00516	0.0685
Clinically diagnosed AD dementia versus CN	seq.12724.81	12724-81	Protein	Cold-inducible RNA-binding protein	CIRBP	Q14011	1153	CIRBP	-0.866197	0.00517	0.0685
Clinically diagnosed AD dementia versus CN	seq.5765.53	5765-53	Protein	Beta-defensin 121	DB121	Q5J5C9	245934	DEFB121	0.292645	0.0052	0.0688
Clinically diagnosed AD dementia versus CN	seq.12549.33	12549-33	Protein	Hematopoietic prostaglandin D synthase	PTGD2	O60760	27306	HPGDS	-0.286248	0.00523	0.0691
Clinically diagnosed AD dementia versus CN	seq.15553.22	15553-22	Protein	Acetylcholinesterase	ACES	P22303	43	ACHE	0.424411	0.00531	0.0699
Clinically diagnosed AD dementia versus CN	seq.19503.2	19503-2	Protein	Sorting nexin-3	SNX3	O60493	8724	SNX3	0.497361	0.00537	0.0706
Clinically diagnosed AD dementia versus CN	seq.24472.28	24472-28	Protein	Sharpin	SHRPN	Q9H0F6	81858	SHARPIN	0.408141	0.0054	0.0709
Clinically diagnosed AD dementia versus CN	seq.6957.14	6957-14	Protein	Pancreatic lipase-related protein 2	LIPR2	P54317	5408	PNLIPRP2	0.247748	0.00541	0.0709
Clinically diagnosed AD dementia versus CN	seq.24699.20	24699-20	Protein	ADP-ribosylation factor-like protein 6-interacting protein 1	AR6P1	Q15041	23204	ARL6IP1	-0.728907	0.00548	0.0717
Clinically diagnosed AD dementia versus CN	seq.6285.71	6285-71	Protein	Malectin	K0152	Q14165	9761	MLEC	-0.851815	0.00552	0.0721
Clinically diagnosed AD dementia versus CN	seq.11670.18	11670-18	Protein	Probable G-protein coupled receptor 101	GP101	Q96P66	83550	GPR101	0.228224	0.00558	0.0727
Clinically diagnosed AD dementia versus CN	seq.12709.63	12709-63	Protein	Histone H1x	H1X	Q92522	8971	H1-10	0.241741	0.00559	0.0727
Clinically diagnosed AD dementia versus CN	seq.12987.12	12987-12	Protein	Serine/arginine-rich splicing factor 7	SRSF7	Q16629	6432	SRSF7	0.26982	0.00562	0.073
Clinically diagnosed AD dementia versus CN	seq.24426.15	24426-15	Protein	Catenin alpha-1	CTNA1	P35221	1495	CTNNA1	0.366197	0.00565	0.0731
Clinically diagnosed AD dementia versus CN	seq.9078.207	9078-207	Protein	Beta-1-syntrophin	SNTB1	Q13884	6641	SNTB1	-0.844868	0.00566	0.0731
Clinically diagnosed AD dementia versus CN	seq.7090.17	7090-17	Protein	Polypeptide N-acetylgalactosaminyltransferase 1	GALT1	Q10472	2589	GALNT1	0.288935	0.00566	0.0731
Clinically diagnosed AD dementia versus CN	seq.14100.63	14100-63	Protein	Complement C1q subcomponent subunit C	C1QC	P02747	714	C1QC	-0.293587	0.00567	0.0731
Clinically diagnosed AD dementia versus CN	seq.11354.21	11354-21	Protein	1-phosphatidylinositol 4,5-bisphosphate phosphodiesterase beta-1	Phospholipase C-beta-1	Q9NQ66	23236	PLCB1	0.396376	0.00568	0.0731
Clinically diagnosed AD dementia versus CN	seq.6527.1	6527-1	Protein	TLR4 interactor with leucine rich repeats:Extracellular domain	TRIL:ECD	Q7L0X0	9865	TRIL	-0.347895	0.00571	0.0734
Clinically diagnosed AD dementia versus CN	seq.20564.53	20564-53	Protein	Thy-1 membrane glycoprotein	THY1	P04216	7070	THY1	-0.265807	0.00577	0.074
Clinically diagnosed AD dementia versus CN	seq.17760.128	17760-128	Protein	WD repeat-containing protein 5	WDR5	P61964	11091	WDR5	0.339301	0.00583	0.0746
Clinically diagnosed AD dementia versus CN	seq.25282.6	25282-6	Protein	Antizyme inhibitor 1	AZIN1	O14977	51582	AZIN1	0.277294	0.00584	0.0746
Clinically diagnosed AD dementia versus CN	seq.24945.16	24945-16	Protein	Sorting nexin-27	SNX27	Q96L92	81609	SNX27	0.51317	0.00586	0.0746
Clinically diagnosed AD dementia versus CN	seq.20972.37	20972-37	Protein	Cleavage and polyadenylation specificity factor subunit 5	CPSF5	O43809	11051	NUDT21	0.542893	0.00586	0.0746
Clinically diagnosed AD dementia versus CN	seq.3461.58	3461-58	Protein	Brevican core protein	PGCB	Q96GW7	63827	BCAN	0.261866	0.00586	0.0746
Clinically diagnosed AD dementia versus CN	seq.12729.12	12729-12	Protein	Proteasome assembly chaperone 3	PSMG3	Q9BT73	84262	PSMG3	0.4423	0.00588	0.0747
Clinically diagnosed AD dementia versus CN	seq.21210.33	21210-33	Protein	DNA polymerase beta	DPOLB	P06746	5423	POLB	0.235777	0.0059	0.0748
Clinically diagnosed AD dementia versus CN	seq.2645.54	2645-54	Protein	Protein kinase C zeta type	PKC-Z	Q05513	5590	PRKCZ	0.248589	0.00593	0.0749
Clinically diagnosed AD dementia versus CN	seq.12503.5	12503-5	Protein	Ovarian cancer G-protein coupled receptor 1	SPR1	Q15743	8111	GPR68	0.332989	0.00594	0.0749
Clinically diagnosed AD dementia versus CN	seq.3000.66	3000-66	Protein	Mannose-binding protein C	MBL	P11226	4153	MBL2	0.258372	0.00594	0.0749
Clinically diagnosed AD dementia versus CN	seq.11681.8	11681-8	Protein	Arf-GAP domain and FG repeat-containing protein 1	NUPL	P52594	3267	AGFG1	-1.06947	0.00596	0.075
Clinically diagnosed AD dementia versus CN	seq.21345.93	21345-93	Protein	Retinol dehydrogenase 12	RDH12	Q96NR8	145226	RDH12	0.442444	0.00598	0.0751
Clinically diagnosed AD dementia versus CN	seq.4123.60	4123-60	Protein	Fibroblast growth factor 4	FGF-4	P08620	2249	FGF4	0.263245	0.00599	0.0751
Clinically diagnosed AD dementia versus CN	seq.3342.76	3342-76	Protein	Abelson tyrosine-protein kinase 2	ABL2	P42684	27	ABL2	0.275093	0.00601	0.0752
Clinically diagnosed AD dementia versus CN	seq.10439.57	10439-57	Protein	Alpha-amylase 2B	Alpha-amylase 2B	P19961	280	AMY2B	0.248702	0.00603	0.0754
Clinically diagnosed AD dementia versus CN	seq.19803.34	19803-34	Protein	Retinol-binding protein 2	RET2	P50120	5948	RBP2	0.303052	0.00605	0.0755
Clinically diagnosed AD dementia versus CN	seq.20959.12	20959-12	Protein	Dual specificity protein phosphatase 18	DUS18	Q8NEJ0	150290	DUSP18	0.248266	0.0061	0.0759
Clinically diagnosed AD dementia versus CN	seq.12783.29	12783-29	Protein	Heterogeneous nuclear ribonucleoprotein M	HNRPM	P52272	4670	HNRNPM	0.274492	0.00611	0.0759
Clinically diagnosed AD dementia versus CN	seq.15511.37	15511-37	Protein	Neuronal pentraxin receptor	NPTXR	O95502	23467	NPTXR	-0.295566	0.00615	0.0763
Clinically diagnosed AD dementia versus CN	seq.22376.95	22376-95	Protein	Homeobox protein Hox-A5	HXA5	P20719	3202	HOXA5	0.284302	0.00615	0.0763
Clinically diagnosed AD dementia versus CN	seq.16915.153	16915-153	Protein	Semaphorin-4A	SEM4A	Q9H3S1	64218	SEMA4A	-0.250919	0.00619	0.0766
Clinically diagnosed AD dementia versus CN	seq.4541.49	4541-49	Protein	Cell adhesion molecule-related/down-regulated by oncogenes	CDON	Q4KMG0	50937	CDON	-0.285837	0.00621	0.0766
Clinically diagnosed AD dementia versus CN	seq.18338.26	18338-26	Protein	Isocitrate dehydrogenase [NADP] cytoplasmic	IDH	O75874	3417	IDH1	0.445906	0.00621	0.0766
Clinically diagnosed AD dementia versus CN	seq.19122.47	19122-47	Protein	Myosin regulatory light chain 12B	ML12B	O14950	103910	MYL12B	-0.557196	0.00632	0.0777
Clinically diagnosed AD dementia versus CN	seq.22783.40	22783-40	Protein	Transcription factor PU.1	SPI1	P17947	6688	SPI1	0.242214	0.00632	0.0777
Clinically diagnosed AD dementia versus CN	seq.4487.1	4487-1	Protein	Fibroblast growth factor 7	FGF7	P21781	2252	FGF7	0.41218	0.00633	0.0777
Clinically diagnosed AD dementia versus CN	seq.13576.15	13576-15	Protein	Glutathione S-transferase P	Glutathione S-transferase Pi	P09211	2950	GSTP1	0.453049	0.00638	0.0781
Clinically diagnosed AD dementia versus CN	seq.4393.3	4393-3	Protein	Fibroblast growth factor 16	FGF-16	O43320	8823	FGF16	0.523038	0.00638	0.0781
Clinically diagnosed AD dementia versus CN	seq.21217.20	21217-20	Protein	Prohibitin-2	PHB2	Q99623	11331	PHB2	0.246142	0.00643	0.0785
Clinically diagnosed AD dementia versus CN	seq.4801.13	4801-13	Protein	Lactoperoxidase	PERL	P22079	4025	LPO	0.252601	0.00648	0.0789
Clinically diagnosed AD dementia versus CN	seq.11388.75	11388-75	Protein	WAP four-disulfide core domain protein 2	HE4	Q14508	10406	WFDC2	0.279835	0.00648	0.0789
Clinically diagnosed AD dementia versus CN	seq.23354.12	23354-12	Protein	Beta-crystallin A2	CRBA2	P53672	1412	CRYBA2	-0.478779	0.00651	0.0791
Clinically diagnosed AD dementia versus CN	seq.3132.1	3132-1	Protein	Vascular endothelial growth factor C	VEGF-C	P49767	7424	VEGFC	0.305196	0.00655	0.0795
Clinically diagnosed AD dementia versus CN	seq.14337.1	14337-1	Protein	Trafficking protein particle complex subunit 3	TPPC3	O43617	27095	TRAPPC3	0.251991	0.00658	0.0796
Clinically diagnosed AD dementia versus CN	seq.3629.60	3629-60	Protein	Serine/threonine-protein kinase MRCK beta	MRCKB	Q9Y5S2	9578	CDC42BPB	0.290074	0.00659	0.0796
Clinically diagnosed AD dementia versus CN	seq.13565.2	13565-2	Protein	Retinoblastoma-like protein 2	p130	Q08999	5934	RBL2	0.268116	0.00664	0.08
Clinically diagnosed AD dementia versus CN	seq.21752.10	21752-10	Protein	Mitochondrial Rho GTPase 1	MIRO1	Q8IXI2	55288	RHOT1	-0.653114	0.00664	0.08
Clinically diagnosed AD dementia versus CN	seq.21931.27	21931-27	Protein	UB2L3/PolyUbiquitin K48	UB2L3/ PolyUbiquitin K48	P68036|P0CG47	7332|7314	UBE2L3|UBB	0.28113	0.00666	0.08
Clinically diagnosed AD dementia versus CN	seq.8399.6	8399-6	Protein	Serine/threonine-protein kinase 17B	DRAK2	O94768	9262	STK17B	0.279457	0.00668	0.0802
Clinically diagnosed AD dementia versus CN	seq.4126.22	4126-22	Protein	Bactericidal permeability-increasing protein	BPI	P17213	671	BPI	0.244746	0.00672	0.0805
Clinically diagnosed AD dementia versus CN	seq.12445.50	12445-50	Protein	Ankyrin repeat domain-containing protein 27	ANR27	Q96NW4	84079	ANKRD27	-0.291452	0.00673	0.0805
Clinically diagnosed AD dementia versus CN	seq.10039.32	10039-32	Protein	Purine nucleoside phosphorylase	PNP	P00491	4860	PNP	-0.761194	0.00677	0.0809
Clinically diagnosed AD dementia versus CN	seq.23393.56	23393-56	Protein	1-acylglycerol-3-phosphate O-acyltransferase ABHD5	ABHD5	Q8WTS1	51099	ABHD5	-0.6173	0.0068	0.081
Clinically diagnosed AD dementia versus CN	seq.24216.30	24216-30	Protein	Mth938 domain-containing protein	AAMDC	Q9H7C9	28971	AAMDC	0.366813	0.0068	0.081
Clinically diagnosed AD dementia versus CN	seq.23967.8	23967-8	Protein	PAXIP1-associated protein 1	PA1	Q9BTK6	79447	PAGR1	-0.831959	0.00682	0.081
Clinically diagnosed AD dementia versus CN	seq.11246.3	11246-3	Protein	BPI fold-containing family B member 1	LPLC1	Q8TDL5	92747	BPIFB1	0.246602	0.00683	0.081
Clinically diagnosed AD dementia versus CN	seq.4960.72	4960-72	Protein	Annexin A1	annexin I	P04083	301	ANXA1	0.239576	0.00693	0.0821
Clinically diagnosed AD dementia versus CN	seq.18392.19	18392-19	Protein	Methionine adenosyltransferase 2 subunit beta	MAT2B	Q9NZL9	27430	MAT2B	0.28149	0.00695	0.0821
Clinically diagnosed AD dementia versus CN	seq.17432.25	17432-25	Protein	Adenylate kinase 4, mitochondrial	KAD4	P27144	205	AK4	-0.269204	0.00696	0.0821
Clinically diagnosed AD dementia versus CN	seq.17735.130	17735-130	Protein	Gamma-aminobutyric acid receptor-associated protein	GBRAP	O95166	11337	GABARAP	0.275284	0.00697	0.0821
Clinically diagnosed AD dementia versus CN	seq.9021.1	9021-1	Protein	Hepatitis A virus cellular receptor 1	TIM-1	Q96D42	26762	HAVCR1	0.241801	0.00704	0.0829
Clinically diagnosed AD dementia versus CN	seq.8364.74	8364-74	Protein	Uronyl 2-sulfotransferase	UST	Q9Y2C2	10090	UST	-0.274096	0.00726	0.0854
Clinically diagnosed AD dementia versus CN	seq.24408.30	24408-30	Protein	Muscleblind-like protein 1	MBNL1	Q9NR56	4154	MBNL1	-0.624408	0.00733	0.0857
Clinically diagnosed AD dementia versus CN	seq.4880.21	4880-21	Protein	Growth/differentiation factor 2	GDF2	Q9UK05	2658	GDF2	0.296774	0.00733	0.0857
Clinically diagnosed AD dementia versus CN	seq.3220.40	3220-40	Protein	Proto-oncogene tyrosine-protein kinase receptor Ret	RET	P07949	5979	RET	-0.257512	0.00733	0.0857
Clinically diagnosed AD dementia versus CN	seq.7186.111	7186-111	Protein	Syntaxin-3	STX3	Q13277	6809	STX3	0.269418	0.00734	0.0857
Clinically diagnosed AD dementia versus CN	seq.7955.195	7955-195	Protein	Inter-alpha-trypsin inhibitor heavy chain H1	ITI heavy chain H1	P19827	3697	ITIH1	-0.278621	0.00739	0.0861
Clinically diagnosed AD dementia versus CN	seq.11656.110	11656-110	Protein	Ena/VASP-like protein	EVL	Q9UI08	51466	EVL	0.272395	0.00743	0.0862
Clinically diagnosed AD dementia versus CN	seq.8878.48	8878-48	Protein	YTH domain-containing protein 1	YTDC1	Q96MU7	91746	YTHDC1	0.289572	0.00743	0.0862
Clinically diagnosed AD dementia versus CN	seq.24937.7	24937-7	Protein	Rho GTPase-activating protein 26	RHG26	Q9UNA1	23092	ARHGAP26	-0.314324	0.00743	0.0862
Clinically diagnosed AD dementia versus CN	seq.3481.87	3481-87	Protein	Xaa-Pro aminopeptidase 1	XPNPEP1	Q9NQW7	7511	XPNPEP1	-0.481369	0.00747	0.0866
Clinically diagnosed AD dementia versus CN	seq.5639.49	5639-49	Protein	Neuropilin and tolloid-like protein 1	NETO1	Q8TDF5	81832	NETO1	0.268276	0.0075	0.0867
Clinically diagnosed AD dementia versus CN	seq.22966.20	22966-20	Protein	Gamma-aminobutyric acid receptor-associated protein	GBRAP	O95166	11337	GABARAP	0.266962	0.00753	0.0869
Clinically diagnosed AD dementia versus CN	seq.7795.14	7795-14	Protein	NKG2-E type II integral membrane protein:Isoform H, Cytoplasmic domain	NKG2E:CD	Q07444	3823	KLRC3	0.246344	0.00754	0.0869
Clinically diagnosed AD dementia versus CN	seq.9506.10	9506-10	Protein	Apolipoprotein L1	Apo L1	O14791	8542	APOL1	0.25831	0.00756	0.0869
Clinically diagnosed AD dementia versus CN	seq.3519.3	3519-3	Protein	C-C motif chemokine 17	TARC	Q92583	6361	CCL17	0.277739	0.00756	0.0869
Clinically diagnosed AD dementia versus CN	seq.19297.4	19297-4	Protein	Glucose-6-phosphate 1-dehydrogenase	G6PD	P11413	2539	G6PD	-0.536953	0.0076	0.0871
Clinically diagnosed AD dementia versus CN	seq.4397.26	4397-26	Protein	Interferon lambda-2	IFN-lambda 2	Q8IZJ0	282616	IFNL2	0.280171	0.0076	0.0871
Clinically diagnosed AD dementia versus CN	seq.3867.49	3867-49	Protein	Seizure 6-like protein 2	SE6L2	Q6UXD5	26470	SEZ6L2	0.358298	0.00765	0.0874
Clinically diagnosed AD dementia versus CN	seq.20939.113	20939-113	Protein	H/ACA ribonucleoprotein complex subunit 2	NHP2	Q9NX24	55651	NHP2	0.235453	0.00765	0.0874
Clinically diagnosed AD dementia versus CN	seq.17712.7	17712-7	Protein	Isopentenyl-diphosphate Delta-isomerase 1	IDI1	Q13907	3422	IDI1	0.475587	0.00768	0.0876
Clinically diagnosed AD dementia versus CN	seq.13700.10	13700-10	Protein	Annexin A2	annexin II	P07355	302	ANXA2	0.266835	0.00773	0.088
Clinically diagnosed AD dementia versus CN	seq.8458.16	8458-16	Protein	Alpha-synuclein	a-Synuclein	P37840	6622	SNCA	-0.57165	0.00788	0.0894
Clinically diagnosed AD dementia versus CN	seq.7152.5	7152-5	Protein	Hepatitis A virus cellular receptor 2	TIMD3	Q8TDQ0	84868	HAVCR2	-0.269764	0.00788	0.0894
Clinically diagnosed AD dementia versus CN	seq.10036.201	10036-201	Protein	Zinc fingers and homeoboxes protein 3	ZHX3	Q9H4I2	23051	ZHX3	-0.250195	0.00791	0.0896
Clinically diagnosed AD dementia versus CN	seq.21742.43	21742-43	Protein	OTU domain-containing protein 7B	OTU7B	Q6GQQ9	56957	OTUD7B	0.587378	0.00793	0.0898
Clinically diagnosed AD dementia versus CN	seq.21445.40	21445-40	Protein	Ubiquitin-like protein Nedd8	Neddylin	Q15843	4738	NEDD8	-0.755424	0.00797	0.09
Clinically diagnosed AD dementia versus CN	seq.4138.25	4138-25	Protein	Interleukin-20	IL-20	Q9NYY1	50604	IL20	0.321876	0.00798	0.09
Clinically diagnosed AD dementia versus CN	seq.20181.17	20181-17	Protein	Integrin alpha-11	ITA11	Q9UKX5	22801	ITGA11	0.260807	0.00801	0.0902
Clinically diagnosed AD dementia versus CN	seq.7945.10	7945-10	Protein	Semaphorin-6A	Semaphorin-6A	Q9H2E6	57556	SEMA6A	-0.274122	0.00803	0.0903
Clinically diagnosed AD dementia versus CN	seq.13473.55	13473-55	Protein	Inositol-trisphosphate 3-kinase A	IP3KA	P23677	3706	ITPKA	0.310969	0.00807	0.0906
Clinically diagnosed AD dementia versus CN	seq.7054.87	7054-87	Protein	C-type lectin domain family 2 member D	CLC2D	Q9UHP7	29121	CLEC2D	0.231921	0.00813	0.091
Clinically diagnosed AD dementia versus CN	seq.19290.5	19290-5	Protein	Hypoxanthine-guanine phosphoribosyltransferase	HPRT	P00492	3251	HPRT1	0.288165	0.00813	0.091
Clinically diagnosed AD dementia versus CN	seq.8953.47	8953-47	Protein	Hepatoma-derived growth factor	HDGF	P51858	3068	HDGF	0.283308	0.00821	0.0917
Clinically diagnosed AD dementia versus CN	seq.8314.71	8314-71	Protein	N-acetylglucosamine-6-sulfatase	GNS	P15586	2799	GNS	0.370588	0.00827	0.0921
Clinically diagnosed AD dementia versus CN	seq.15375.49	15375-49	Protein	Carboxypeptidase B	Carboxypeptidase B1	P15086	1360	CPB1	0.236389	0.00828	0.0921
Clinically diagnosed AD dementia versus CN	seq.24723.58	24723-58	Protein	Eukaryotic translation initiation factor 2 subunit 2	eIF-2-beta	P20042	8894	EIF2S2	-0.745153	0.00828	0.0921
Clinically diagnosed AD dementia versus CN	seq.4389.2	4389-2	Protein	Desert hedgehog protein N-product	DHH	O43323	50846	DHH	0.428654	0.00829	0.0921
Clinically diagnosed AD dementia versus CN	seq.12593.33	12593-33	Protein	p53 and DNA damage-regulated protein 1	PDRG1	Q9NUG6	81572	PDRG1	0.427637	0.00833	0.0924
Clinically diagnosed AD dementia versus CN	seq.9026.40	9026-40	Protein	Butyrophilin-like protein 8	BTNL8	Q6UX41	79908	BTNL8	0.31126	0.00835	0.0925
Clinically diagnosed AD dementia versus CN	seq.23359.25	23359-25	Protein	Pre-mRNA-splicing regulator WTAP	FL2D	Q15007	9589	WTAP	-0.263554	0.00842	0.0931
Clinically diagnosed AD dementia versus CN	seq.21514.1	21514-1	Protein	Platelet glycoprotein Ib beta chain	GP1BB	P13224	2812	GP1BB	0.328612	0.00844	0.0931
Clinically diagnosed AD dementia versus CN	seq.4469.78	4469-78	Protein	Carbohydrate sulfotransferase 15	ST4S6	Q7LFX5	51363	CHST15	0.27008	0.00844	0.0931
Clinically diagnosed AD dementia versus CN	seq.10889.2	10889-2	Protein	Melanocortin-2 receptor accessory protein 2	MRAP2	Q96G30	112609	MRAP2	0.260906	0.00847	0.0933
Clinically diagnosed AD dementia versus CN	seq.9893.27	9893-27	Protein	Ornithine decarboxylase antizyme 1	Ornithine decarboxylase antizyme	P54368	4946	OAZ1	0.326854	0.00849	0.0933
Clinically diagnosed AD dementia versus CN	seq.2666.53	2666-53	Protein	Decorin	Bone proteoglycan II	P07585	1634	DCN	0.241987	0.0085	0.0933
Clinically diagnosed AD dementia versus CN	seq.18231.147	18231-147	Protein	Prion-like protein doppel	PRND	Q9UKY0	23627	PRND	-0.265743	0.00851	0.0933
Clinically diagnosed AD dementia versus CN	seq.24266.2	24266-2	Protein	Myocyte-specific enhancer factor 2D	MEF2D	Q14814	4209	MEF2D	0.2515	0.00853	0.0933
Clinically diagnosed AD dementia versus CN	seq.21661.82	21661-82	Protein	Dentin matrix protein 4	DMP4	Q8IXL6	56975	FAM20C	-0.26607	0.00854	0.0933
Clinically diagnosed AD dementia versus CN	seq.15471.29	15471-29	Protein	Pancreatic lipase-related protein 2	LIPR2	P54317	5408	PNLIPRP2	0.226618	0.00856	0.0934
Clinically diagnosed AD dementia versus CN	seq.20374.41	20374-41	Protein	Ubiquinone biosynthesis protein COQ9, mitochondrial	COQ9	O75208	57017	COQ9	0.27571	0.00862	0.0937
Clinically diagnosed AD dementia versus CN	seq.24983.119	24983-119	Protein	ELKS/RAB6-interacting/CAST family member 1	RB6I2	Q8IUD2	23085	ERC1	-0.842501	0.00862	0.0937
Clinically diagnosed AD dementia versus CN	seq.25275.30	25275-30	Protein	Histone deacetylase 4	HDAC4	P56524	9759	HDAC4	0.331947	0.00866	0.0941
Clinically diagnosed AD dementia versus CN	seq.19615.213	19615-213	Protein	Cytosolic 5'-nucleotidase 3A	5NT3	Q9H0P0	51251	NT5C3A	-0.445482	0.00871	0.0944
Clinically diagnosed AD dementia versus CN	seq.25104.10	25104-10	Protein	Transcription factor CP2-like protein 1	TF2L1	Q9NZI6	29842	TFCP2L1	-0.705917	0.00872	0.0944
Clinically diagnosed AD dementia versus CN	seq.5242.37	5242-37	Protein	Dual specificity mitogen-activated protein kinase kinase 4	MP2K4	P45985	6416	MAP2K4	-0.246153	0.00873	0.0944
Clinically diagnosed AD dementia versus CN	seq.17784.23	17784-23	Protein	Glia maturation factor beta	GMFB	P60983	2764	GMFB	-0.343237	0.00885	0.0954
Clinically diagnosed AD dementia versus CN	seq.22027.13	22027-13	Protein	Transforming acidic coiled-coil-containing protein 3	TACC3	Q9Y6A5	10460	TACC3	0.276786	0.00885	0.0954
Clinically diagnosed AD dementia versus CN	seq.11431.235	11431-235	Protein	ATP-dependent DNA helicase Q1	RECQ1	P46063	5965	RECQL	0.347337	0.00887	0.0955
Clinically diagnosed AD dementia versus CN	seq.7788.1	7788-1	Protein	ATP synthase-coupling factor 6, mitochondrial	CF6	P18859	522	ATP5PF	-0.312451	0.0089	0.0957
Clinically diagnosed AD dementia versus CN	seq.7924.7	7924-7	Protein	T-cell surface glycoprotein CD3 gamma chain	CD3G	P09693	917	CD3G	0.29275	0.00899	0.0964
Clinically diagnosed AD dementia versus CN	seq.22082.25	22082-25	Protein	Protein BEX2	BEX2	Q9BXY8	84707	BEX2	0.264455	0.009	0.0964
Clinically diagnosed AD dementia versus CN	seq.19347.37	19347-37	Protein	Carbonic anhydrase 12	Carbonic Anhydrase XII	O43570	771	CA12	0.266253	0.00901	0.0964
Clinically diagnosed AD dementia versus CN	seq.8906.60	8906-60	Protein	Leucine-rich repeat and transmembrane domain-containing protein 2	LRTM2	Q8N967	654429	LRTM2	-0.264217	0.00902	0.0964
Clinically diagnosed AD dementia versus CN	seq.10752.8	10752-8	Protein	Chromodomain Y-like protein 2	CDYL2	Q8N8U2	124359	CDYL2	-0.256595	0.00912	0.0969
Clinically diagnosed AD dementia versus CN	seq.21540.73	21540-73	Protein	Bridging integrator 2	BIN2	Q9UBW5	51411	BIN2	-0.405601	0.00912	0.0969
Clinically diagnosed AD dementia versus CN	seq.5301.7	5301-7	Protein	Eotaxin	Eotaxin	P51671	6356	CCL11	0.243381	0.00912	0.0969
Clinically diagnosed AD dementia versus CN	seq.21136.1	21136-1	Protein	Proteasome assembly chaperone 2	PSMG2	Q969U7	56984	PSMG2	-0.312238	0.00914	0.0969
Clinically diagnosed AD dementia versus CN	seq.18348.89	18348-89	Protein	Heterogeneous nuclear ribonucleoprotein D0	HNRPD	Q14103	3184	HNRNPD	0.316532	0.00914	0.0969
Clinically diagnosed AD dementia versus CN	seq.3684.78	3684-78	Protein	Macrophage scavenger receptor types I and II:Extracellular domain	Macrophage scavenger receptor:ECD	P21757	4481	MSR1	0.347793	0.00915	0.0969
Clinically diagnosed AD dementia versus CN	seq.25121.7	25121-7	Protein	Nodal modulator 2	NOMO2	Q5JPE7	283820	NOMO2	-0.252622	0.00916	0.0969
Clinically diagnosed AD dementia versus CN	seq.11103.24	11103-24	Protein	Heat shock protein beta-1	HSP 27	P04792	3315	HSPB1	-0.560003	0.00918	0.097
Clinically diagnosed AD dementia versus CN	seq.2668.70	2668-70	Protein	Calpain I	Calpain I	P07384|P04632	823|826	CAPN1|CAPNS1	-0.821937	0.00923	0.0974
Clinically diagnosed AD dementia versus CN	seq.9025.5	9025-5	Protein	Alpha-hemoglobin-stabilizing protein	AHSP	Q9NZD4	51327	AHSP	-0.24946	0.00927	0.0974
Clinically diagnosed AD dementia versus CN	seq.9051.13	9051-13	Protein	Interleukin-32	IL32	P24001	9235	IL32	0.229276	0.00927	0.0974
Clinically diagnosed AD dementia versus CN	seq.18291.8	18291-8	Protein	Cyclin-dependent kinase inhibitor 1	p21	P38936	1026	CDKN1A	0.407492	0.00942	0.0989
Clinically diagnosed AD dementia versus CN	seq.19257.11	19257-11	Protein	Clathrin light chain A	CLCA	P09496	1211	CLTA	-0.298413	0.00943	0.0989
Clinically diagnosed AD dementia versus CN	seq.3709.4	3709-4	Protein	Alanine aminotransferase 1	ALT	P24298	2875	GPT	0.327487	0.00945	0.0989
Clinically diagnosed AD dementia versus CN	seq.19141.22	19141-22	Protein	Death-associated protein 1	DAP1	P51397	1611	DAP	0.22412	0.00961	0.101
Clinically diagnosed AD dementia versus CN	seq.10557.6	10557-6	Protein	Testis-expressed sequence 29 protein	TEX29	Q8N6K0	121793	TEX29	0.483098	0.00964	0.101
Clinically diagnosed AD dementia versus CN	seq.16805.5	16805-5	Protein	cGMP-specific 3',5'-cyclic phosphodiesterase	PDE5A	O76074	8654	PDE5A	-0.436571	0.00965	0.101
Clinically diagnosed AD dementia versus CN	seq.4413.3	4413-3	Protein	Antileukoproteinase	SLPI	P03973	6590	SLPI	0.236075	0.00976	0.102
Clinically diagnosed AD dementia versus CN	seq.4534.10	4534-10	Protein	Brain-specific serine protease 4	BSSP4	Q9GZN4	64063	PRSS22	0.273612	0.0098	0.102
Clinically diagnosed AD dementia versus CN	seq.8219.14	8219-14	Protein	Zymogen granule membrane protein 16	ZG16	O60844	653808	ZG16	0.216007	0.00985	0.102
Clinically diagnosed AD dementia versus CN	seq.13943.38	13943-38	Protein	Protein dpy-30 homolog	DPY30	Q9C005	84661	DPY30	0.350543	0.00987	0.102
Clinically diagnosed AD dementia versus CN	seq.12537.88	12537-88	Protein	Transcriptional activator protein Pur-alpha	PURA	Q00577	5813	PURA	0.589877	0.00988	0.102
Clinically diagnosed AD dementia versus CN	seq.24446.65	24446-65	Protein	Muscleblind-like protein 2	MBNL2	Q5VZF2	10150	MBNL2	-0.586994	0.0099	0.102
Clinically diagnosed AD dementia versus CN	seq.25085.37	25085-37	Protein	Tether containing UBX domain for GLUT4	ASPC1	Q9BZE9	79058	ASPSCR1	0.610692	0.00993	0.102
Clinically diagnosed AD dementia versus CN	seq.11205.10	11205-10	Protein	Integrin beta-7	Integrin beta-7	P26010	3695	ITGB7	0.239057	0.00995	0.102
Clinically diagnosed AD dementia versus CN	seq.17344.23	17344-23	Protein	Stomatin-like protein 1	STML1	Q9UBI4	9399	STOML1	0.266118	0.00995	0.102
Clinically diagnosed AD dementia versus CN	seq.4240.31	4240-31	Protein	Pyruvate kinase PKM	M2-PK	P14618	5315	PKM	-0.671753	0.00996	0.102
Clinically diagnosed AD dementia versus CN	seq.2834.54	2834-54	Protein	Kallikrein-8	kallikrein 8	O60259	11202	KLK8	0.278386	0.00998	0.102
Clinically diagnosed AD dementia versus CN	seq.16620.26	16620-26	Protein	Lymphocyte antigen 75	LY75	O60449	100526664	LY75	-0.23391	0.01	0.103
Clinically diagnosed AD dementia versus CN	seq.17384.110	17384-110	Protein	ATP-dependent 6-phosphofructokinase, muscle type	K6PF	P08237	5213	PFKM	0.336769	0.01	0.103
Clinically diagnosed AD dementia versus CN	seq.6374.7	6374-7	Protein	Matrix metalloproteinase-20	MMP20	O60882	9313	MMP20	0.230745	0.0101	0.103
Clinically diagnosed AD dementia versus CN	seq.20175.17	20175-17	Protein	Collagen alpha-3(IX) chain	CO9A3	Q14050	1299	COL9A3	0.235346	0.0101	0.103
Clinically diagnosed AD dementia versus CN	seq.25917.12	25917-12	Protein	Beta-hexosaminidase alpha chain	Hexosaminidase A	P06865	3073	HEXA	-0.289302	0.0102	0.104
Clinically diagnosed AD dementia versus CN	seq.3521.16	3521-16	Protein	Thyroid Stimulating Hormone	TSH	P01215|P01222	1081|7252	CGA|TSHB	0.230718	0.0102	0.104
Clinically diagnosed AD dementia versus CN	seq.19289.29	19289-29	Protein	Uroporphyrinogen decarboxylase	DCUP	P06132	7389	UROD	-0.294172	0.0102	0.104
Clinically diagnosed AD dementia versus CN	seq.5748.20	5748-20	Protein	Acid ceramidase	Acid ceramidase	Q13510	427	ASAH1	0.804117	0.0103	0.104
Clinically diagnosed AD dementia versus CN	seq.23677.30	23677-30	Protein	NCK-interacting protein with SH3 domain	SPN90	Q9NZQ3	51517	NCKIPSD	-0.503853	0.0103	0.105
Clinically diagnosed AD dementia versus CN	seq.6715.63	6715-63	Protein	Alkaline phosphatase, placental-like	PPBN	P10696	251	ALPG	0.229023	0.0104	0.105
Clinically diagnosed AD dementia versus CN	seq.8942.2	8942-2	Protein	39S ribosomal protein L21, mitochondrial	RM21	Q7Z2W9	219927	MRPL21	0.250022	0.0104	0.105
Clinically diagnosed AD dementia versus CN	seq.14082.56	14082-56	Protein	Talin-2	TLN2	Q9Y4G6	83660	TLN2	-0.51063	0.0104	0.105
Clinically diagnosed AD dementia versus CN	seq.14205.6	14205-6	Protein	Protein HEXIM2	HEXI2	Q96MH2	124790	HEXIM2	0.300287	0.0105	0.106
Clinically diagnosed AD dementia versus CN	seq.7756.37	7756-37	Protein	Killer cell lectin-like receptor subfamily F member 1	KLRF1	Q9NZS2	51348	KLRF1	0.250461	0.0105	0.106
Clinically diagnosed AD dementia versus CN	seq.11161.5	11161-5	Protein	Spartin	SPG20	Q8N0X7	23111	SPART	0.68138	0.0106	0.107
Clinically diagnosed AD dementia versus CN	seq.5132.71	5132-71	Protein	Interleukin-27 receptor subunit alpha	TCCR	Q6UWB1	9466	IL27RA	-0.244975	0.0108	0.108
Clinically diagnosed AD dementia versus CN	seq.4133.54	4133-54	Protein	Granzyme B	Granzyme B	P10144	3002	GZMB	0.222188	0.0108	0.108
Clinically diagnosed AD dementia versus CN	seq.20540.65	20540-65	Protein	Semaphorin-4G	SEM4G	Q9NTN9	57715	SEMA4G	-0.24901	0.0108	0.108
Clinically diagnosed AD dementia versus CN	seq.14109.15	14109-15	Protein	C-C motif chemokine 15	MIP-5	Q16663	6359	CCL15	0.223924	0.0108	0.108
Clinically diagnosed AD dementia versus CN	seq.17843.30	17843-30	Protein	Phosphopantothenate--cysteine ligase	PPCS	Q9HAB8	79717	PPCS	-0.885429	0.0108	0.108
Clinically diagnosed AD dementia versus CN	seq.21508.7	21508-7	Protein	Alpha-N-acetylneuraminide alpha-2,8-sialyltransferase	SIA8A	Q92185	6489	ST8SIA1	-0.227085	0.0109	0.108
Clinically diagnosed AD dementia versus CN	seq.9751.72	9751-72	Protein	Nuclease-sensitive element-binding protein 1	NSEP1	P67809	4904	YBX1	0.249956	0.0109	0.108
Clinically diagnosed AD dementia versus CN	seq.13497.34	13497-34	Protein	Eukaryotic translation initiation factor 3 subunit J	EIF3J	O75822	8669	EIF3J	0.384649	0.0109	0.108
Clinically diagnosed AD dementia versus CN	seq.18864.7	18864-7	Protein	Trypsin-3	TRY3	P35030	5646	PRSS3	0.220225	0.011	0.108
Clinically diagnosed AD dementia versus CN	seq.19295.32	19295-32	Protein	Serine/threonine-protein phosphatase PP1-gamma catalytic subunit	PP1G	P36873	5501	PPP1CC	-0.483018	0.011	0.108
Clinically diagnosed AD dementia versus CN	seq.4496.60	4496-60	Protein	Macrophage metalloelastase	MMP-12	P39900	4321	MMP12	0.243907	0.011	0.108
Clinically diagnosed AD dementia versus CN	seq.17746.77	17746-77	Protein	Mitochondrial fission 1 protein	FIS1	Q9Y3D6	51024	FIS1	0.43918	0.011	0.108
Clinically diagnosed AD dementia versus CN	seq.25276.32	25276-32	Protein	Rab-like protein 6	RABL6	Q3YEC7	55684	RABL6	0.41101	0.011	0.108
Clinically diagnosed AD dementia versus CN	seq.15367.38	15367-38	Protein	BPI fold-containing family B member 1	LPLC1	Q8TDL5	92747	BPIFB1	0.224941	0.011	0.108
Clinically diagnosed AD dementia versus CN	seq.25454.38	25454-38	Protein	Protein arginine N-methyltransferase 2	ANM2	P55345	3275	PRMT2	-0.32005	0.011	0.109
Clinically diagnosed AD dementia versus CN	seq.12812.25	12812-25	Protein	Acylphosphatase-2	ACYP2	P14621	98	ACYP2	0.370408	0.0111	0.109
Clinically diagnosed AD dementia versus CN	seq.13470.43	13470-43	Protein	Parathyroid hormone/parathyroid hormone-related peptide receptor	PTH1R	Q03431	5745	PTH1R	0.301564	0.0111	0.109
Clinically diagnosed AD dementia versus CN	seq.20067.26	20067-26	Protein	Factor seven-activating protease	FSAP	Q14520	3026	HABP2	-0.246826	0.0111	0.109
Clinically diagnosed AD dementia versus CN	seq.8851.42	8851-42	Protein	Protein FAM171B:Extracellular domain	F171B:ECD	Q6P995	165215	FAM171B	0.372487	0.0111	0.109
Clinically diagnosed AD dementia versus CN	seq.12368.18	12368-18	Protein	Histone acetyltransferase KAT2B	PCAF	Q92831	8850	KAT2B	0.232209	0.0112	0.11
Clinically diagnosed AD dementia versus CN	seq.18375.28	18375-28	Protein	Interleukin-36 receptor antagonist protein	IL-1F5	Q9UBH0	26525	IL36RN	-0.301172	0.0112	0.11
Clinically diagnosed AD dementia versus CN	seq.3620.67	3620-67	Protein	Interleukin-22 receptor subunit alpha-1	IL22RA1	Q8N6P7	58985	IL22RA1	0.252958	0.0112	0.11
Clinically diagnosed AD dementia versus CN	seq.5034.79	5034-79	Protein	Trypsin-2	Trypsin 2	P07478	5645	PRSS2	0.222632	0.0113	0.11
Clinically diagnosed AD dementia versus CN	seq.3822.54	3822-54	Protein	MAP kinase-activated protein kinase 3	MAPKAPK3	Q16644	7867	MAPKAPK3	-0.673648	0.0114	0.111
Clinically diagnosed AD dementia versus CN	seq.5346.24	5346-24	Protein	Copine-1:Ca2+-dependent membrane-targeting module domains 1 and 2	CPNE1:C2, 1 and 2	Q99829	8904	CPNE1	-0.407366	0.0114	0.111
Clinically diagnosed AD dementia versus CN	seq.16867.76	16867-76	Protein	Cyclin-dependent kinase 16	PCTK1	Q00536	5127	CDK16	0.402029	0.0114	0.111
Clinically diagnosed AD dementia versus CN	seq.9925.56	9925-56	Protein	Scavenger receptor class F member 2:Cytoplasmic domain	SREC-II:CD	Q96GP6	91179	SCARF2	0.237743	0.0115	0.111
Clinically diagnosed AD dementia versus CN	seq.9993.11	9993-11	Protein	Zinc finger protein 264	ZN264	O43296	9422	ZNF264	0.25377	0.0115	0.111
Clinically diagnosed AD dementia versus CN	seq.5688.65	5688-65	Protein	Cerebellin-4	CBLN4	Q9NTU7	140689	CBLN4	-0.247401	0.0116	0.112
Clinically diagnosed AD dementia versus CN	seq.12014.19	12014-19	Protein	6-pyruvoyl tetrahydrobiopterin synthase	PTPS	Q03393	5805	PTS	0.26349	0.0116	0.112
Clinically diagnosed AD dementia versus CN	seq.18401.18	18401-18	Protein	Alpha-ketoglutarate-dependent dioxygenase alkB homolog 3	ALKB3	Q96Q83	221120	ALKBH3	0.393586	0.0116	0.112
Clinically diagnosed AD dementia versus CN	seq.11288.26	11288-26	Protein	Cytosolic purine 5'-nucleotidase	5NTC	P49902	22978	NT5C2	0.354224	0.0117	0.112
Clinically diagnosed AD dementia versus CN	seq.13620.10	13620-10	Protein	ATPase ASNA1	ASNA	O43681	439	GET3	0.249849	0.0117	0.112
Clinically diagnosed AD dementia versus CN	seq.17804.102	17804-102	Protein	Pyridoxine-5'-phosphate oxidase	PNPO	Q9NVS9	55163	PNPO	0.294335	0.0117	0.112
Clinically diagnosed AD dementia versus CN	seq.11370.20	11370-20	Protein	72 kDa inositol polyphosphate 5-phosphatase	INP5E	Q9NRR6	56623	INPP5E	0.21766	0.0117	0.112
Clinically diagnosed AD dementia versus CN	seq.9061.3	9061-3	Protein	Rho guanine nucleotide exchange factor 10	ARHGA	O15013	9639	ARHGEF10	0.224477	0.0117	0.112
Clinically diagnosed AD dementia versus CN	seq.5467.15	5467-15	Protein	Heat shock protein HSP 90-beta	HSP 90b	P08238	3326	HSP90AB1	-0.918258	0.0118	0.113
Clinically diagnosed AD dementia versus CN	seq.7224.11	7224-11	Protein	T-cell receptor-associated transmembrane adapter 1	TRAT1	Q6PIZ9	50852	TRAT1	0.256295	0.0118	0.113
Clinically diagnosed AD dementia versus CN	seq.4498.62	4498-62	Protein	Neural cell adhesion molecule 1, 120 kDa isoform	NCAM-120	P13591	4684	NCAM1	0.246118	0.0119	0.114
Clinically diagnosed AD dementia versus CN	seq.23266.62	23266-62	Protein	MIT domain-containing protein 1	MITD1	Q8WV92	129531	MITD1	-0.821005	0.0119	0.114
Clinically diagnosed AD dementia versus CN	seq.13950.9	13950-9	Protein	Collagen type IV alpha-3-binding protein:StAR-related lipid-transfer domain, isoform 2	C43BP:START domain	Q9Y5P4	10087	CERT1	0.331873	0.012	0.114
Clinically diagnosed AD dementia versus CN	seq.11351.233	11351-233	Protein	Non-homologous end-joining factor 1	NHEJ1	Q9H9Q4	79840	NHEJ1	0.299663	0.0123	0.117
Clinically diagnosed AD dementia versus CN	seq.2967.8	2967-8	Protein	Vascular cell adhesion protein 1	VCAM-1	P19320	7412	VCAM1	-0.254143	0.0123	0.117
Clinically diagnosed AD dementia versus CN	seq.23703.8	23703-8	Protein	PDZ and LIM domain protein 5	PDLI5	Q96HC4	10611	PDLIM5	-0.522552	0.0123	0.117
Clinically diagnosed AD dementia versus CN	seq.3222.11	3222-11	Protein	Semaphorin-3A	Semaphorin 3A	Q14563	10371	SEMA3A	0.223182	0.0123	0.117
Clinically diagnosed AD dementia versus CN	seq.14250.115	14250-115	Protein	Bleomycin hydrolase	BLMH	Q13867	642	BLMH	0.224368	0.0124	0.117
Clinically diagnosed AD dementia versus CN	seq.2989.17	2989-17	Protein	Interferon gamma	IFN-g	P01579	3458	IFNG	0.437057	0.0125	0.118
Clinically diagnosed AD dementia versus CN	seq.25284.47	25284-47	Protein	Ubiquitin-like modifier-activating enzyme 6	UBA6	A0AVT1	55236	UBA6	-0.711331	0.0125	0.118
Clinically diagnosed AD dementia versus CN	seq.6237.11	6237-11	Protein	Fibroblast growth factor receptor-like 1	FGRL1	Q8N441	53834	FGFRL1	0.266452	0.0125	0.118
Clinically diagnosed AD dementia versus CN	seq.23263.9	23263-9	Protein	BTB/POZ domain-containing protein KCTD15	KCD15	Q96SI1	79047	KCTD15	-0.316703	0.0125	0.118
Clinically diagnosed AD dementia versus CN	seq.12001.7	12001-7	Protein	Tight junction protein ZO-1	ZO1	Q07157	7082	TJP1	0.249188	0.0128	0.12
Clinically diagnosed AD dementia versus CN	seq.4245.80	4245-80	Protein	E3 ubiquitin-protein ligase Mdm2	MDM2	Q00987	4193	MDM2	0.229404	0.0128	0.12
Clinically diagnosed AD dementia versus CN	seq.6925.26	6925-26	Protein	Sorting nexin-8	SNX8	Q9Y5X2	29886	SNX8	-0.609402	0.0128	0.12
Clinically diagnosed AD dementia versus CN	seq.12904.180	12904-180	Protein	cubilin	cubilin	O60494	8029	CUBN	0.211628	0.0129	0.121
Clinically diagnosed AD dementia versus CN	seq.14655.1	14655-1	Protein	DnaJ homolog subfamily C member 17	DJC17	Q9NVM6	55192	DNAJC17	0.28314	0.013	0.122
Clinically diagnosed AD dementia versus CN	seq.6267.51	6267-51	Protein	Stathmin-4	STMN4	Q9H169	81551	STMN4	0.219991	0.0131	0.122
Clinically diagnosed AD dementia versus CN	seq.21760.22	21760-22	Protein	Ubiquitin-activating enzyme E1	UBE1	P22314	7317	UBA1	-0.776915	0.0131	0.122
Clinically diagnosed AD dementia versus CN	seq.3067.67	3067-67	Protein	Growth/differentiation factor 9	GDF-9	O60383	2661	GDF9	0.239456	0.0131	0.122
Clinically diagnosed AD dementia versus CN	seq.5005.4	5005-4	Protein	Mitogen-activated protein kinase 12	MK12	P53778	6300	MAPK12	0.242086	0.0132	0.123
Clinically diagnosed AD dementia versus CN	seq.21237.24	21237-24	Protein	Protein-arginine deiminase type-4	PADI4	Q9UM07	23569	PADI4	0.226203	0.0132	0.123
Clinically diagnosed AD dementia versus CN	seq.17802.4	17802-4	Protein	Sialic acid synthase	SIAS	Q9NR45	54187	NANS	-0.500068	0.0133	0.123
Clinically diagnosed AD dementia versus CN	seq.15314.49	15314-49	Protein	Chloride intracellular channel protein 4	CLIC4	Q9Y696	25932	CLIC4	-0.817104	0.0134	0.124
Clinically diagnosed AD dementia versus CN	seq.21535.5	21535-5	Protein	Alanyl-tRNA editing protein Aarsd1	AASD1	Q9BTE6	100885850	AARSD1	-0.226272	0.0134	0.124
Clinically diagnosed AD dementia versus CN	seq.18821.9	18821-9	Protein	C4a anaphylatoxin	C4a	P0C0L4|P0C0L5	720|100293534	C4A|C4B	-0.307349	0.0135	0.124
Clinically diagnosed AD dementia versus CN	seq.9176.3	9176-3	Protein	Mucin-1:region 2	MUC1:region 2	P15941	4582	MUC1	-0.262605	0.0135	0.124
Clinically diagnosed AD dementia versus CN	seq.25233.2	25233-2	Protein	Mannose-6-phosphate isomerase	MPI	P34949	4351	MPI	-0.345601	0.0135	0.124
Clinically diagnosed AD dementia versus CN	seq.5677.15	5677-15	Protein	Uncharacterized protein C2orf66	CB066	Q6UXQ4	401027	C2orf66	0.236654	0.0136	0.125
Clinically diagnosed AD dementia versus CN	seq.17817.22	17817-22	Protein	DNA damage-inducible transcript 4 protein	DDIT4	Q9NX09	54541	DDIT4	0.247502	0.0136	0.125
Clinically diagnosed AD dementia versus CN	seq.12374.8	12374-8	Protein	Platelet-activating factor acetylhydrolase IB subunit gamma	PA1B3	Q15102	5050	PAFAH1B3	0.246239	0.0136	0.125
Clinically diagnosed AD dementia versus CN	seq.10080.9	10080-9	Protein	Translation initiation factor eIF-2B subunit alpha	EI2BA	Q14232	1967	EIF2B1	-0.481467	0.0136	0.125
Clinically diagnosed AD dementia versus CN	seq.24259.24	24259-24	Protein	Forkhead box protein P4	FOXP4	Q8IVH2	116113	FOXP4	0.418428	0.0137	0.125
Clinically diagnosed AD dementia versus CN	seq.15591.28	15591-28	Protein	Glutathione peroxidase 1	Glutathione peroxidase	P07203	2876	GPX1	-0.338675	0.0137	0.126
Clinically diagnosed AD dementia versus CN	seq.5383.14	5383-14	Protein	Tumor necrosis factor receptor superfamily member 13C	BAFF Receptor	Q96RJ3	115650	TNFRSF13C	0.354144	0.0138	0.126
Clinically diagnosed AD dementia versus CN	seq.24970.117	24970-117	Protein	Serrate RNA effector molecule homolog	SRRT	Q9BXP5	51593	SRRT	0.224468	0.0138	0.126
Clinically diagnosed AD dementia versus CN	seq.9768.5	9768-5	Protein	Interleukin-10 receptor subunit alpha:Cytoplasmic domain	IL-10 Ra:CD	Q13651	3587	IL10RA	0.21211	0.0138	0.126
Clinically diagnosed AD dementia versus CN	seq.22503.24	22503-24	Protein	Homeobox protein Mohawk	MKX	Q8IYA7	283078	MKX	0.235195	0.0138	0.126
Clinically diagnosed AD dementia versus CN	seq.22118.7	22118-7	Protein	Chondrosarcoma-associated gene 2/3 protein	CSAG2	Q9Y5P2	389903	CSAG2	-0.280311	0.0138	0.126
Clinically diagnosed AD dementia versus CN	seq.10900.272	10900-272	Protein	Stathmin-2	STMN2	Q93045	11075	STMN2	0.386494	0.0139	0.126
Clinically diagnosed AD dementia versus CN	seq.18310.26	18310-26	Protein	Selenoprotein W	SELW	P63302	6415	SELENOW	0.247263	0.0139	0.126
Clinically diagnosed AD dementia versus CN	seq.21478.20	21478-20	Protein	SMAD5	SMAD5	Q99717	4090	SMAD5	-0.752142	0.0139	0.126
Clinically diagnosed AD dementia versus CN	seq.3217.74	3217-74	Protein	Glia-derived nexin	Protease nexin I	P07093	5270	SERPINE2	0.246295	0.0139	0.126
Clinically diagnosed AD dementia versus CN	seq.5252.33	5252-33	Protein	Dual 3',5'-cyclic-AMP and -GMP phosphodiesterase 11A	PDE11	Q9HCR9	50940	PDE11A	-0.705854	0.0139	0.126
Clinically diagnosed AD dementia versus CN	seq.3470.1	3470-1	Protein	E-selectin	sE-Selectin	P16581	6401	SELE	-0.218739	0.014	0.126
Clinically diagnosed AD dementia versus CN	seq.24648.8	24648-8	Protein	Histone RNA hairpin-binding protein	SLBP	Q14493	7884	SLBP	0.323091	0.0142	0.128
Clinically diagnosed AD dementia versus CN	seq.12373.73	12373-73	Protein	Transformer-2 protein homolog beta	TRA2B	P62995	6434	TRA2B	0.222711	0.0142	0.128
Clinically diagnosed AD dementia versus CN	seq.2949.6	2949-6	Protein	Group 10 secretory phospholipase A2	GX	O15496	8399	PLA2G10	0.225169	0.0143	0.128
Clinically diagnosed AD dementia versus CN	seq.14002.18	14002-18	Protein	Dedicator of cytokinesis protein 9	DOCK9	Q9BZ29	23348	DOCK9	0.255706	0.0143	0.128
Clinically diagnosed AD dementia versus CN	seq.21828.6	21828-6	Protein	Ribophorin II	RPN2	P04844	6185	RPN2	-0.25138	0.0144	0.128
Clinically diagnosed AD dementia versus CN	seq.12411.60	12411-60	Protein	Protein max	MAX	P61244	4149	MAX	0.531911	0.0144	0.128
Clinically diagnosed AD dementia versus CN	seq.11592.1	11592-1	Protein	ELAV-like protein 1	ELAV1	Q15717	1994	ELAVL1	0.321118	0.0144	0.128
Clinically diagnosed AD dementia versus CN	seq.6520.87	6520-87	Protein	Matrix Gla protein	MGP	P08493	4256	MGP	0.237219	0.0144	0.128
Clinically diagnosed AD dementia versus CN	seq.23020.18	23020-18	Protein	Regulator of G-protein signaling 4	RGS4	P49798	5999	RGS4	-0.252491	0.0144	0.128
Clinically diagnosed AD dementia versus CN	seq.4130.71	4130-71	Protein	Fibroblast growth factor 6	FGF-6	P10767	2251	FGF6	0.288991	0.0144	0.128
Clinically diagnosed AD dementia versus CN	seq.19584.33	19584-33	Protein	Fibroblast growth factor 9	FGF9	P31371	2254	FGF9	-0.269635	0.0144	0.129
Clinically diagnosed AD dementia versus CN	seq.7071.23	7071-23	Protein	Endoplasmic reticulum mannosyl-oligosaccharide 1,2-alpha-mannosidase	MA1B1	Q9UKM7	11253	MAN1B1	-0.389413	0.0145	0.129
Clinically diagnosed AD dementia versus CN	seq.8459.10	8459-10	Protein	Bone morphogenetic protein 6	BMP-6	P22004	654	BMP6	0.400941	0.0146	0.129
Clinically diagnosed AD dementia versus CN	seq.25245.22	25245-22	Protein	Synembryn-A	RIC8A	Q9NPQ8	60626	RIC8A	0.253789	0.0146	0.129
Clinically diagnosed AD dementia versus CN	seq.7813.6	7813-6	Protein	Alkaline phosphatase, placental type	Alkaline phosphatase, placental	P05187	250	ALPP	0.217306	0.0146	0.13
Clinically diagnosed AD dementia versus CN	seq.14324.52	14324-52	Protein	Structural maintenance of chromosomes protein 3	CSPG6	Q9UQE7	9126	SMC3	0.266244	0.0147	0.13
Clinically diagnosed AD dementia versus CN	seq.5339.49	5339-49	Protein	Protein S100-A9	calgranulin B	P06702	6280	S100A9	0.216176	0.0149	0.131
Clinically diagnosed AD dementia versus CN	seq.12573.80	12573-80	Protein	Tripartite motif-containing protein 3	TRIM3	O75382	10612	TRIM3	0.257612	0.0149	0.131
Clinically diagnosed AD dementia versus CN	seq.15503.15	15503-15	Protein	Left-right determination factor 2	Lefty-A	O00292	7044	LEFTY2	0.228947	0.0149	0.131
Clinically diagnosed AD dementia versus CN	seq.19504.22	19504-22	Protein	Thymidylate kinase	KTHY	P23919	1841	DTYMK	-0.656374	0.0149	0.131
Clinically diagnosed AD dementia versus CN	seq.19124.9	19124-9	Protein	Ubiquitin-like domain-containing CTD phosphatase 1	UBCP1	Q8WVY7	134510	UBLCP1	0.387959	0.015	0.132
Clinically diagnosed AD dementia versus CN	seq.3761.4	3761-4	Protein	Prostaglandin G/H synthase 2	COX-2	P35354	5743	PTGS2	0.202448	0.015	0.132
Clinically diagnosed AD dementia versus CN	seq.2968.61	2968-61	Protein	Tumor necrosis factor ligand superfamily member 15	TNFSF15	O95150	9966	TNFSF15	0.238843	0.015	0.132
Clinically diagnosed AD dementia versus CN	seq.11248.43	11248-43	Protein	Uroporphyrinogen-III synthase	HEM4	P10746	7390	UROS	0.231594	0.0151	0.133
Clinically diagnosed AD dementia versus CN	seq.19236.24	19236-24	Protein	Activated RNA polymerase II transcriptional coactivator p15	TCP4	P53999	10923	SUB1	0.211101	0.0152	0.133
Clinically diagnosed AD dementia versus CN	seq.18331.3	18331-3	Protein	Glucosylceramidase	GLCM	P04062	2629	GBA	-0.242746	0.0152	0.133
Clinically diagnosed AD dementia versus CN	seq.4184.43	4184-43	Protein	Eukaryotic translation initiation factor 4E-binding protein 2	4EBP2	Q13542	1979	EIF4EBP2	0.221598	0.0152	0.133
Clinically diagnosed AD dementia versus CN	seq.17325.10	17325-10	Protein	Guanylate kinase	KGUA	Q16774	2987	GUK1	-0.604326	0.0152	0.133
Clinically diagnosed AD dementia versus CN	seq.16079.2	16079-2	Protein	Tyrosine-protein kinase Tec	TEC	P42680	7006	TEC	0.503527	0.0152	0.133
Clinically diagnosed AD dementia versus CN	seq.15322.35	15322-35	Protein	Death domain-containing protein CRADD	CRADD	P78560	8738	CRADD	-0.385476	0.0153	0.133
Clinically diagnosed AD dementia versus CN	seq.8874.53	8874-53	Protein	Ceroid-lipofuscinosis neuronal protein 5:Lumenal domain	CLN5:LD	O75503	1203	CLN5	0.249157	0.0154	0.134
Clinically diagnosed AD dementia versus CN	seq.24271.9	24271-9	Protein	Mannose-1-phosphate guanyltransferase alpha	GMPPA	Q96IJ6	29926	GMPPA	-0.265607	0.0155	0.134
Clinically diagnosed AD dementia versus CN	seq.13126.52	13126-52	Protein	Desmocollin-2	DSC2	Q02487	1824	DSC2	0.232802	0.0155	0.134
Clinically diagnosed AD dementia versus CN	seq.7143.9	7143-9	Protein	N-acetyllactosaminide beta-1,6-N-acetylglucosaminyl-transferase, isoform C	GNT2C	Q8NFS9	2651	None	0.229586	0.0155	0.134
Clinically diagnosed AD dementia versus CN	seq.8894.80	8894-80	Protein	Heterogeneous nuclear ribonucleoprotein A/B	hnRNP A/B	Q99729	3182	HNRNPAB	0.262404	0.0156	0.134
Clinically diagnosed AD dementia versus CN	seq.11572.4	11572-4	Protein	Dynamin-2	DYN2	P50570	1785	DNM2	-1.06753	0.0157	0.136
Clinically diagnosed AD dementia versus CN	seq.9931.20	9931-20	Protein	Keratin, type II cytoskeletal 1	Keratin-1	P04264	3848	KRT1	-0.232252	0.0157	0.136
Clinically diagnosed AD dementia versus CN	seq.22793.110	22793-110	Protein	Transcription initiation factor IIA subunit 2	T2AG	P52657	2958	GTF2A2	0.293455	0.0157	0.136
Clinically diagnosed AD dementia versus CN	seq.12635.9	12635-9	Protein	tRNA (cytosine(38)-C(5))-methyltransferase	TRDMT	O14717	1787	TRDMT1	0.219166	0.0158	0.136
Clinically diagnosed AD dementia versus CN	seq.5717.2	5717-2	Protein	Cartilage intermediate layer protein 1	CILP	O75339	8483	CILP	0.502223	0.0158	0.136
Clinically diagnosed AD dementia versus CN	seq.15540.6	15540-6	Protein	Vimentin	Vimentin	P08670	7431	VIM	0.211366	0.0158	0.136
Clinically diagnosed AD dementia versus CN	seq.24488.8	24488-8	Protein	Protein HID1	HID1	Q8IV36	283987	HID1	-0.261695	0.0159	0.136
Clinically diagnosed AD dementia versus CN	seq.19195.85	19195-85	Protein	40S ribosomal protein S5	RS5	P46782	6193	RPS5	0.312016	0.0159	0.136
Clinically diagnosed AD dementia versus CN	seq.19150.20	19150-20	Protein	Phosphoribosyl pyrophosphate synthase-associated protein 2	KPRB	O60256	5636	PRPSAP2	-0.503318	0.0162	0.139
Clinically diagnosed AD dementia versus CN	seq.24252.85	24252-85	Protein	Probable peptide chain release factor C12orf65, mitochondrial	CL065	Q9H3J6	91574	C12orf65	0.204857	0.0162	0.139
Clinically diagnosed AD dementia versus CN	seq.24952.28	24952-28	Protein	Far upstream element-binding protein 3	FUBP3	Q96I24	8939	FUBP3	0.534084	0.0163	0.139
Clinically diagnosed AD dementia versus CN	seq.24268.21	24268-21	Protein	GRB2-associated-binding protein 1	GAB1	Q13480	2549	GAB1	0.397232	0.0163	0.139
Clinically diagnosed AD dementia versus CN	seq.9017.58	9017-58	Protein	Lactase-phlorizin hydrolase	LPH	P09848	3938	LCT	-0.212744	0.0163	0.139
Clinically diagnosed AD dementia versus CN	seq.8479.4	8479-4	Protein	Stromelysin-2	MMP-10	P09238	4319	MMP10	0.226623	0.0164	0.139
Clinically diagnosed AD dementia versus CN	seq.16588.10	16588-10	Protein	78 kDa glucose-regulated protein	BiP	P11021	3309	HSPA5	-0.24787	0.0164	0.139
Clinically diagnosed AD dementia versus CN	seq.9994.217	9994-217	Protein	Potassium-transporting ATPase subunit beta	ATP4B	P51164	496	ATP4B	0.255058	0.0164	0.139
Clinically diagnosed AD dementia versus CN	seq.22430.15	22430-15	Protein	N-chimaerin	CHIN	P15882	1123	CHN1	0.29341	0.0164	0.139
Clinically diagnosed AD dementia versus CN	seq.7948.129	7948-129	Protein	Glycolipid transfer protein domain-containing protein 2	GLTD2	A6NH11	388323	GLTPD2	-0.229334	0.0164	0.139
Clinically diagnosed AD dementia versus CN	seq.17785.11	17785-11	Protein	2'-deoxynucleoside 5'-phosphate N-hydrolase 1	RCL	O43598	10591	DNPH1	0.209352	0.0164	0.139
Clinically diagnosed AD dementia versus CN	seq.20237.38	20237-38	Protein	Ornithine aminotransferase, mitochondrial	OAT	P04181	4942	OAT	0.187768	0.0164	0.139
Clinically diagnosed AD dementia versus CN	seq.21370.45	21370-45	Protein	Spindle and kinetochore-associated protein 1	SKA1	Q96BD8	220134	SKA1	-0.349124	0.0165	0.139
Clinically diagnosed AD dementia versus CN	seq.15422.12	15422-12	Protein	Myelin P2 protein	MYP2	P02689	5375	PMP2	0.21723	0.0166	0.139
Clinically diagnosed AD dementia versus CN	seq.24954.83	24954-83	Protein	AP-1 complex subunit beta-1	AP1B1	Q10567	162	AP1B1	-0.363936	0.0166	0.14
Clinically diagnosed AD dementia versus CN	seq.9761.89	9761-89	Protein	L-lactate dehydrogenase A chain	LDHA	P00338	3939	LDHA	0.21426	0.0168	0.141
Clinically diagnosed AD dementia versus CN	seq.2816.50	2816-50	Protein	Basal Cell Adhesion Molecule	BCAM	P50895	4059	BCAM	-0.328039	0.0168	0.141
Clinically diagnosed AD dementia versus CN	seq.9199.6	9199-6	Protein	Ubiquitin-conjugating enzyme E2 G2	UB2G2	P60604	7327	UBE2G2	0.216259	0.0169	0.141
Clinically diagnosed AD dementia versus CN	seq.3379.29	3379-29	Protein	Protein kinase C iota type	KPCI	P41743	5584	PRKCI	0.433989	0.0169	0.141
Clinically diagnosed AD dementia versus CN	seq.14083.25	14083-25	Protein	Selenide, water dikinase 1	SPS1	P49903	22929	SEPHS1	0.465998	0.0169	0.141
Clinically diagnosed AD dementia versus CN	seq.3423.59	3423-59	Protein	Chymase	Chymase	P23946	1215	CMA1	0.236309	0.0169	0.141
Clinically diagnosed AD dementia versus CN	seq.3321.2	3321-2	Protein	Interleukin-24	IL24	Q13007	11009	IL24	0.223914	0.0169	0.141
Clinically diagnosed AD dementia versus CN	seq.8458.111	8458-111	Protein	Alpha-synuclein	a-Synuclein	P37840	6622	SNCA	-0.416545	0.0169	0.141
Clinically diagnosed AD dementia versus CN	seq.20454.24	20454-24	Protein	SOSS complex subunit B2	SOSB2	Q96AH0	64859	NABP1	0.318078	0.017	0.141
Clinically diagnosed AD dementia versus CN	seq.20948.16	20948-16	Protein	U8 snoRNA-decapping enzyme	NUD16	Q96DE0	131870	NUDT16	-0.418866	0.017	0.141
Clinically diagnosed AD dementia versus CN	seq.16298.84	16298-84	Protein	Group IID secretory phospholipase A2	sPLA(2)-IID	Q9UNK4	26279	PLA2G2D	0.20196	0.017	0.141
Clinically diagnosed AD dementia versus CN	seq.8845.2	8845-2	Protein	A disintegrin and metalloproteinase with thrombospondin motifs 3	ATS3	O15072	9508	ADAMTS3	0.230235	0.017	0.141
Clinically diagnosed AD dementia versus CN	seq.8347.222	8347-222	Protein	Beta-defensin 129	DB129	Q9H1M3	140881	DEFB129	0.229504	0.0171	0.141
Clinically diagnosed AD dementia versus CN	seq.5694.57	5694-57	Protein	SPARC-related modular calcium-binding protein 1	SMOC1	Q9H4F8	64093	SMOC1	0.240597	0.0171	0.141
Clinically diagnosed AD dementia versus CN	seq.19238.12	19238-12	Protein	Glutamine synthetase	GLNA	P15104	2752	GLUL	0.240916	0.0171	0.141
Clinically diagnosed AD dementia versus CN	seq.4192.10	4192-10	Protein	Alcohol dehydrogenase [NADP(+)]	AK1A1	P14550	10327	AKR1A1	0.386326	0.0172	0.142
Clinically diagnosed AD dementia versus CN	seq.19367.34	19367-34	Protein	Enoyl-CoA delta isomerase 1, mitochondrial	D3D2	P42126	1632	ECI1	0.220169	0.0172	0.142
Clinically diagnosed AD dementia versus CN	seq.4318.12	4318-12	Protein	Tyrosine-protein phosphatase non-receptor type 6	PTP-1C	P29350	5777	PTPN6	-0.321584	0.0172	0.142
Clinically diagnosed AD dementia versus CN	seq.23673.9	23673-9	Protein	Lipoamide acyltransferase component of branched-chain alpha-keto acid dehydrogenase complex, mitochondrial	ODB2	P11182	1629	DBT	-0.364067	0.0173	0.142
Clinically diagnosed AD dementia versus CN	seq.18326.50	18326-50	Protein	Melanoma-associated antigen 8	MAGA8	P43361	4107	MAGEA8	0.238731	0.0173	0.142
Clinically diagnosed AD dementia versus CN	seq.3143.3	3143-3	Protein	T-cell surface glycoprotein CD4	sCD4	P01730	920	CD4	0.203712	0.0173	0.142
Clinically diagnosed AD dementia versus CN	seq.12737.12	12737-12	Protein	Plastin-1	PLSI	Q14651	5357	PLS1	0.219236	0.0174	0.143
Clinically diagnosed AD dementia versus CN	seq.17814.8	17814-8	Protein	3'(2'),5'-bisphosphate nucleotidase 1	BPNT1	O95861	10380	BPNT1	0.549233	0.0174	0.143
Clinically diagnosed AD dementia versus CN	seq.12804.5	12804-5	Protein	Glucocorticoid modulatory element-binding protein 2	GMEB2	Q9UKD1	26205	GMEB2	0.197475	0.0175	0.143
Clinically diagnosed AD dementia versus CN	seq.6385.63	6385-63	Protein	von Willebrand factor A domain-containing protein 1	VWA1	Q6PCB0	64856	VWA1	0.226765	0.0175	0.143
Clinically diagnosed AD dementia versus CN	seq.4428.1	4428-1	Protein	Carbohydrate sulfotransferase 2	CHST2	Q9Y4C5	9435	CHST2	0.192414	0.0176	0.143
Clinically diagnosed AD dementia versus CN	seq.9456.34	9456-34	Protein	Interleukin-22 receptor subunit alpha-2	IL-22BP	Q969J5	116379	IL22RA2	-0.226103	0.0176	0.143
Clinically diagnosed AD dementia versus CN	seq.13411.21	13411-21	Protein	E3 ubiquitin-protein ligase NRDP1	RNF41	Q9H4P4	10193	RNF41	0.236417	0.0177	0.144
Clinically diagnosed AD dementia versus CN	seq.19276.124	19276-124	Protein	Small nuclear ribonucleoprotein G	RUXG	P62308	6637	SNRPG	0.634777	0.0178	0.145
Clinically diagnosed AD dementia versus CN	seq.13594.158	13594-158	Protein	ADP-ribosylation factor-binding protein GGA1	GGA1	Q9UJY5	26088	GGA1	-0.915482	0.0178	0.145
Clinically diagnosed AD dementia versus CN	seq.13650.11	13650-11	Protein	Kv channel-interacting protein 1	KCIP1	Q9NZI2	30820	KCNIP1	-0.232623	0.0178	0.145
Clinically diagnosed AD dementia versus CN	seq.7185.29	7185-29	Protein	Platelet glycoprotein V	GPV	P40197	2814	GP5	-0.487667	0.0178	0.145
Clinically diagnosed AD dementia versus CN	seq.5360.9	5360-9	Protein	RAC-beta serine/threonine-protein kinase	PKB beta	P31751	208	AKT2	0.69552	0.0178	0.145
Clinically diagnosed AD dementia versus CN	seq.4217.49	4217-49	Protein	3-hydroxyacyl-CoA dehydrogenase type-2	ERAB	Q99714	3028	HSD17B10	-0.54531	0.0179	0.145
Clinically diagnosed AD dementia versus CN	seq.20578.10	20578-10	Protein	Latrophilin-3	LPHN3	Q9HAR2	23284	ADGRL3	-0.297871	0.0179	0.145
Clinically diagnosed AD dementia versus CN	seq.10339.48	10339-48	Protein	Gamma-enolase	NSE	P09104	2026	ENO2	-0.324091	0.0179	0.145
Clinically diagnosed AD dementia versus CN	seq.23378.29	23378-29	Protein	CGG triplet repeat-binding protein 1	CGBP1	Q9UFW8	8545	CGGBP1	0.211765	0.018	0.145
Clinically diagnosed AD dementia versus CN	seq.23311.19	23311-19	Protein	Ribonuclease P protein subunit p25	RPP25	Q9BUL9	54913	RPP25	-0.29497	0.018	0.145
Clinically diagnosed AD dementia versus CN	seq.22034.61	22034-61	Protein	Zinc finger and BTB domain-containing protein 16	ZBT16	Q05516	7704	ZBTB16	0.248099	0.018	0.145
Clinically diagnosed AD dementia versus CN	seq.17812.2	17812-2	Protein	Protein tyrosine phosphatase type IVA 1	TP4A1	Q93096	7803	PTP4A1	-0.2571	0.018	0.145
Clinically diagnosed AD dementia versus CN	seq.16892.23	16892-23	Protein	Ectonucleotide pyrophosphatase/phosphodiesterase family member 2	ENPP2	Q13822	5168	ENPP2	0.214706	0.0181	0.145
Clinically diagnosed AD dementia versus CN	seq.9004.24	9004-24	Protein	Low-density lipoprotein receptor class A domain-containing protein 4	CR001	O15165	753	LDLRAD4	0.272931	0.0181	0.145
Clinically diagnosed AD dementia versus CN	seq.18387.7	18387-7	Protein	Hsc70-interacting protein	suppression of tumorigenicity 13	P50502	6767	ST13	-0.262628	0.0181	0.145
Clinically diagnosed AD dementia versus CN	seq.11560.76	11560-76	Protein	Nuclear factor of activated T-cells, cytoplasmic 4	NFAC4	Q14934	4776	NFATC4	0.254583	0.0182	0.146
Clinically diagnosed AD dementia versus CN	seq.24681.2	24681-2	Protein	Phosphoserine phosphatase	SERB	P78330	5723	PSPH	-0.224371	0.0182	0.146
Clinically diagnosed AD dementia versus CN	seq.20432.6	20432-6	Protein	Pyroglutamyl-peptidase 1	PGPI	Q9NXJ5	54858	PGPEP1	0.248958	0.0183	0.146
Clinically diagnosed AD dementia versus CN	seq.8239.223	8239-223	Protein	Cholinesterase	Pseudocholinesterase	P06276	590	BCHE	-0.234186	0.0183	0.146
Clinically diagnosed AD dementia versus CN	seq.12401.3	12401-3	Protein	AMSH-like protease	STALP	Q96FJ0	57559	STAMBPL1	0.223367	0.0184	0.147
Clinically diagnosed AD dementia versus CN	seq.3587.53	3587-53	Protein	Bone morphogenetic protein 10	BMP10	O95393	27302	BMP10	0.214994	0.0185	0.147
Clinically diagnosed AD dementia versus CN	seq.6234.74	6234-74	Protein	Vitrin	VITRN	Q6UXI7	5212	VIT	0.234863	0.0185	0.147
Clinically diagnosed AD dementia versus CN	seq.22432.83	22432-83	Protein	Serine/threonine-protein kinase SRPK1	SRPK1	Q96SB4	6732	SRPK1	0.348221	0.0185	0.147
Clinically diagnosed AD dementia versus CN	seq.10089.7	10089-7	Protein	N-acetylserotonin O-methyltransferase-like protein	ASML	O95671	8623	ASMTL	0.309225	0.0186	0.147
Clinically diagnosed AD dementia versus CN	seq.8933.84	8933-84	Protein	Myocyte-specific enhancer factor 2C	MEF2C	Q06413	4208	MEF2C	0.205091	0.0186	0.147
Clinically diagnosed AD dementia versus CN	seq.2605.49	2605-49	Protein	Tumor necrosis factor receptor superfamily member 8	CD30	P28908	943	TNFRSF8	0.237303	0.0186	0.147
Clinically diagnosed AD dementia versus CN	seq.3848.14	3848-14	Protein	Glyceraldehyde-3-phosphate dehydrogenase	GAPDH, liver	P04406	2597	GAPDH	0.339364	0.0186	0.147
Clinically diagnosed AD dementia versus CN	seq.11330.15	11330-15	Protein	Casein kinase II subunit beta	CSK2B	P67870	1460	CSNK2B	0.262691	0.0186	0.147
Clinically diagnosed AD dementia versus CN	seq.8687.26	8687-26	Protein	Transmembrane protein 106B	T106B	Q9NUM4	54664	TMEM106B	-0.267896	0.0186	0.147
Clinically diagnosed AD dementia versus CN	seq.19117.3	19117-3	Protein	Protein phosphatase 1 regulatory subunit 14A	PP14A	Q96A00	94274	PPP1R14A	-0.44271	0.0186	0.147
Clinically diagnosed AD dementia versus CN	seq.8871.14	8871-14	Protein	Nuclear migration protein nudC:N-term, contains nuclear localization domain	NUDC:N-term	Q9Y266	10726	NUDC	0.251193	0.0187	0.147
Clinically diagnosed AD dementia versus CN	seq.3427.63	3427-63	Protein	Casein kinase II subunit alpha	CSK21	P68400	1457	CSNK2A1	0.272451	0.0188	0.148
Clinically diagnosed AD dementia versus CN	seq.19166.15	19166-15	Protein	40S ribosomal protein S19	RS19	P39019	6223	RPS19	0.35581	0.0188	0.148
Clinically diagnosed AD dementia versus CN	seq.12817.1	12817-1	Protein	GTP-binding protein GEM	GEM	P55040	2669	GEM	0.220582	0.0188	0.148
Clinically diagnosed AD dementia versus CN	seq.9999.1	9999-1	Protein	Interferon regulatory factor 6	IRF6	O14896	3664	IRF6	-0.503715	0.0189	0.148
Clinically diagnosed AD dementia versus CN	seq.11158.40	11158-40	Protein	Bicaudal D-related protein 1	BICR1	Q6ZP65	92558	BICDL1	0.214146	0.0189	0.148
Clinically diagnosed AD dementia versus CN	seq.11102.22	11102-22	Protein	Regenerating islet-derived protein 4	REG4	Q9BYZ8	83998	REG4	0.214882	0.0189	0.148
Clinically diagnosed AD dementia versus CN	seq.19119.10	19119-10	Protein	DNA damage-inducible transcript 3 protein	DDIT3	P35638	1649	DDIT3	0.207368	0.019	0.148
Clinically diagnosed AD dementia versus CN	seq.5756.66	5756-66	Protein	Pappalysin-2	PAPP2	Q9BXP8	60676	PAPPA2	0.203787	0.019	0.148
Clinically diagnosed AD dementia versus CN	seq.11110.4	11110-4	Protein	Transmembrane protein 119	TM119	Q4V9L6	338773	TMEM119	0.197057	0.019	0.148
Clinically diagnosed AD dementia versus CN	seq.4450.26	4450-26	Protein	Heterogeneous nuclear ribonucleoprotein A/B	hnRNP A/B	Q99729	3182	HNRNPAB	0.64056	0.0191	0.149
Clinically diagnosed AD dementia versus CN	seq.11692.21	11692-21	Protein	SHC-transforming protein 4	SHC4	Q6S5L8	399694	SHC4	0.196387	0.0192	0.149
Clinically diagnosed AD dementia versus CN	seq.5249.31	5249-31	Protein	Serine/threonine-protein kinase 17B	DRAK2	O94768	9262	STK17B	0.204586	0.0192	0.149
Clinically diagnosed AD dementia versus CN	seq.4961.17	4961-17	Protein	Annexin A2	annexin II	P07355	302	ANXA2	0.236925	0.0192	0.149
Clinically diagnosed AD dementia versus CN	seq.10693.43	10693-43	Protein	Killer cell lectin-like receptor subfamily G member 2:C-term	KLRG2:C-term	A4D1S0	346689	KLRG2	0.202618	0.0193	0.15
Clinically diagnosed AD dementia versus CN	seq.8018.43	8018-43	Protein	V-set and immunoglobulin domain-containing protein 2	VSIG2	Q96IQ7	23584	VSIG2	0.212544	0.0193	0.15
Clinically diagnosed AD dementia versus CN	seq.3312.64	3312-64	Protein	High affinity immunoglobulin gamma Fc receptor I	FCGR1	P12314	2209	FCGR1A	0.19786	0.0195	0.151
Clinically diagnosed AD dementia versus CN	seq.3187.52	3187-52	Protein	Cysteine-rich secretory protein 3	CRIS3	P54108	10321	CRISP3	0.220871	0.0196	0.151
Clinically diagnosed AD dementia versus CN	seq.21104.37	21104-37	Protein	Ubiquitin-like protein 5	UBL5	Q9BZL1	59286	UBL5	0.382267	0.0196	0.152
Clinically diagnosed AD dementia versus CN	seq.22782.80	22782-80	Protein	Kinetochore protein Spc25	SPC25	Q9HBM1	57405	SPC25	0.216365	0.0197	0.152
Clinically diagnosed AD dementia versus CN	seq.13132.14	13132-14	Protein	Semaphorin-5A	SEM5A	Q13591	9037	SEMA5A	-0.215772	0.0197	0.152
Clinically diagnosed AD dementia versus CN	seq.12458.79	12458-79	Protein	Calcineurin B homologous protein 1	CHP1	Q99653	11261	CHP1	0.315186	0.0197	0.152
Clinically diagnosed AD dementia versus CN	seq.2867.52	2867-52	Protein	RAC-alpha serine/threonine-protein kinase	PKB	P31749	207	AKT1	0.983121	0.0197	0.152
Clinically diagnosed AD dementia versus CN	seq.9436.2	9436-2	Protein	DNA-binding protein inhibitor ID-1	ID-1	P41134	3397	ID1	-0.230827	0.0198	0.152
Clinically diagnosed AD dementia versus CN	seq.20965.18	20965-18	Protein	Microtubule-associated proteins 1A/1B light chain 3 beta 2	MP3B2	A6NCE7	643246	MAP1LC3B2	0.236051	0.0198	0.152
Clinically diagnosed AD dementia versus CN	seq.8992.1	8992-1	Protein	Transmembrane protein 2	TMEM2	Q9UHN6	23670	CEMIP2	-0.242297	0.0198	0.152
Clinically diagnosed AD dementia versus CN	seq.15474.7	15474-7	Protein	Peptidyl-prolyl cis-trans isomerase NIMA-interacting 1	PIN1	Q13526	5300	PIN1	-0.825574	0.0198	0.152
Clinically diagnosed AD dementia versus CN	seq.21115.48	21115-48	Protein	Pre-miRNA 5'-monophosphate methyltransferase	BN3D2	Q7Z5W3	144233	BCDIN3D	-0.204334	0.0199	0.152
Clinically diagnosed AD dementia versus CN	seq.22120.4	22120-4	Protein	DDB1- and CUL4-associated factor 11	DCA11	Q8TEB1	80344	DCAF11	0.262456	0.02	0.153
Clinically diagnosed AD dementia versus CN	seq.13717.15	13717-15	Protein	Ficolin-2	FCN2	Q15485	2220	FCN2	-0.221743	0.02	0.153
Clinically diagnosed AD dementia versus CN	seq.12888.18	12888-18	Protein	Histone deacetylase complex subunit SAP30	SAP30	O75446	8819	SAP30	0.203815	0.02	0.153
Clinically diagnosed AD dementia versus CN	seq.20093.9	20093-9	Protein	Vascular cell adhesion protein 1	VCAM-1	P19320	7412	VCAM1	-0.229047	0.02	0.153
Clinically diagnosed AD dementia versus CN	seq.3636.37	3636-37	Protein	Oxidized low-density lipoprotein receptor 1	OLR1	P78380	4973	OLR1	0.211978	0.0201	0.153
Clinically diagnosed AD dementia versus CN	seq.4481.34	4481-34	Protein	Complement C4	C4	P0C0L4|P0C0L5	720|100293534	C4A|C4B	0.291122	0.0201	0.153
Clinically diagnosed AD dementia versus CN	seq.20514.8	20514-8	Protein	BMP and activin membrane-bound inhibitor homolog:Extracellular domain	BAMBI:ECD	Q13145	25805	BAMBI	-0.284936	0.0201	0.153
Clinically diagnosed AD dementia versus CN	seq.6405.74	6405-74	Protein	Pregnancy-specific beta-1-glycoprotein 2	PSG2	P11465	5670	PSG2	-0.228532	0.0202	0.153
Clinically diagnosed AD dementia versus CN	seq.2421.7	2421-7	Protein	Brain-derived neurotrophic factor	BDNF	P23560	627	BDNF	0.225526	0.0202	0.153
Clinically diagnosed AD dementia versus CN	seq.19169.88	19169-88	Protein	Acidic fibroblast growth factor intracellular-binding protein	FIBP	O43427	9158	FIBP	-0.702736	0.0203	0.154
Clinically diagnosed AD dementia versus CN	seq.5412.53	5412-53	Protein	CD27 antigen	CD27	P26842	939	CD27	-0.211372	0.0203	0.154
Clinically diagnosed AD dementia versus CN	seq.4588.1	4588-1	Protein	Pancreatic hormone	PH	P01298	5539	PPY	0.205976	0.0204	0.154
Clinically diagnosed AD dementia versus CN	seq.12945.33	12945-33	Protein	Ras-related protein Rab-18	RAB18	Q9NP72	22931	RAB18	-0.225168	0.0204	0.154
Clinically diagnosed AD dementia versus CN	seq.4545.53	4545-53	Protein	Mitochondrial import inner membrane translocase subunit TIM14	DnaJ homolog	Q96DA6	131118	DNAJC19	0.266758	0.0205	0.154
Clinically diagnosed AD dementia versus CN	seq.18871.24	18871-24	Protein	Allograft inflammatory factor 1-like	AIF1L	Q9BQI0	83543	AIF1L	0.208322	0.0205	0.155
Clinically diagnosed AD dementia versus CN	seq.6448.36	6448-36	Protein	Semaphorin-3C	Sema E	Q99985	10512	SEMA3C	-0.251581	0.0206	0.155
Clinically diagnosed AD dementia versus CN	seq.7842.52	7842-52	Protein	Small EDRK-rich factor 1	SERF1	O75920	728492	SERF1A	0.241436	0.0206	0.155
Clinically diagnosed AD dementia versus CN	seq.3202.28	3202-28	Protein	Kremen protein 2	KREM2	Q8NCW0	79412	KREMEN2	0.290844	0.0206	0.155
Clinically diagnosed AD dementia versus CN	seq.22472.4	22472-4	Protein	Transcription factor 12	HTF4	Q99081	6938	TCF12	-0.207026	0.0207	0.155
Clinically diagnosed AD dementia versus CN	seq.12562.1	12562-1	Protein	Serine/threonine-protein kinase N1	PKN1	Q16512	5585	PKN1	0.323168	0.0207	0.155
Clinically diagnosed AD dementia versus CN	seq.15641.20	15641-20	Protein	Tomoregulin-1	TEFF1	Q8IYR6	100526694	TMEFF1	0.249144	0.0207	0.155
Clinically diagnosed AD dementia versus CN	seq.20584.4	20584-4	Protein	Nectin-1, isoform gamma:Extracellular domain	nectin-1 gamma:ECD	Q15223	5818	NECTIN1	-0.224936	0.0209	0.156
Clinically diagnosed AD dementia versus CN	seq.8690.25	8690-25	Protein	Caveolin-3	CAV3	P56539	859	CAV3	0.262005	0.0211	0.157
Clinically diagnosed AD dementia versus CN	seq.23675.16	23675-16	Protein	Centrosomal protein of 76 kDa	CEP76	Q8TAP6	79959	CEP76	-0.211981	0.0211	0.158
Clinically diagnosed AD dementia versus CN	seq.4332.6	4332-6	Protein	C-type lectin domain family 1 member B	CLC1B	Q9P126	51266	CLEC1B	-0.501444	0.0212	0.158
Clinically diagnosed AD dementia versus CN	seq.18833.76	18833-76	Protein	Astrocytic phosphoprotein PEA-15	PEA15	Q15121	8682	PEA15	-0.263726	0.0213	0.159
Clinically diagnosed AD dementia versus CN	seq.12488.9	12488-9	Protein	Malignant T-cell-amplified sequence 1	MCTS1	Q9ULC4	28985	MCTS1	0.200255	0.0215	0.16
Clinically diagnosed AD dementia versus CN	seq.3174.2	3174-2	Protein	A disintegrin and metalloproteinase with thrombospondin motifs 1	ATS1	Q9UHI8	9510	ADAMTS1	0.22287	0.0216	0.161
Clinically diagnosed AD dementia versus CN	seq.5671.1	5671-1	Protein	Chymotrypsinogen B	Chymotrypsin	P17538	1504	CTRB1	0.194941	0.0217	0.161
Clinically diagnosed AD dementia versus CN	seq.21331.19	21331-19	Protein	B-cell CLL/lymphoma 7 protein family member A	BCL7A	Q4VC05	605	BCL7A	0.224936	0.0217	0.161
Clinically diagnosed AD dementia versus CN	seq.22074.35	22074-35	Protein	Ataxin-2-binding protein 1	Ataxin-2-binding protein 1	Q9NWB1	54715	RBFOX1	0.212431	0.0217	0.161
Clinically diagnosed AD dementia versus CN	seq.6210.100	6210-100	Protein	Interferon alpha-5	IFNA5	P01569	3442	IFNA5	-0.318545	0.0217	0.161
Clinically diagnosed AD dementia versus CN	seq.24260.4	24260-4	Protein	Histone-lysine N-methyltransferase setd3	SETD3	Q86TU7	84193	SETD3	0.741304	0.0217	0.161
Clinically diagnosed AD dementia versus CN	seq.23588.9	23588-9	Protein	Hydroxysteroid dehydrogenase-like protein 2	HSDL2	Q6YN16	84263	HSDL2	0.260304	0.0219	0.162
Clinically diagnosed AD dementia versus CN	seq.5689.1	5689-1	Protein	Beta-defensin 112	DB112	Q30KQ8	245915	DEFB112	-0.219539	0.022	0.162
Clinically diagnosed AD dementia versus CN	seq.10043.31	10043-31	Protein	Bromodomain-containing protein 4	BRD4	O60885	23476	BRD4	0.200843	0.022	0.162
Clinically diagnosed AD dementia versus CN	seq.20189.28	20189-28	Protein	Integrin alpha V beta 6	Integrin aVb6	P06756|P18564	3685|3694	ITGAV|ITGB6	0.189393	0.022	0.162
Clinically diagnosed AD dementia versus CN	seq.21369.15	21369-15	Protein	RNA 3'-terminal phosphate cyclase	RTCA	O00442	8634	RTCA	-0.509558	0.0221	0.162
Clinically diagnosed AD dementia versus CN	seq.2431.17	2431-17	Protein	Cathepsin G	Cathepsin G	P08311	1511	CTSG	0.20098	0.0221	0.163
Clinically diagnosed AD dementia versus CN	seq.20562.78	20562-78	Protein	Killer cell lectin-like receptor subfamily B member 1	KLRB1	Q12918	3820	KLRB1	0.20089	0.0222	0.163
Clinically diagnosed AD dementia versus CN	seq.16758.96	16758-96	Protein	Hepatoma-derived growth factor	HDGF	P51858	3068	HDGF	0.252681	0.0223	0.163
Clinically diagnosed AD dementia versus CN	seq.20423.40	20423-40	Protein	Calcium and integrin-binding protein 1	CIB1	Q99828	10519	CIB1	-0.212069	0.0223	0.164
Clinically diagnosed AD dementia versus CN	seq.19631.13	19631-13	Protein	Kininostatin	Kininostatin	P01042	3827	KNG1	-0.243238	0.0224	0.164
Clinically diagnosed AD dementia versus CN	seq.8864.59	8864-59	Protein	Centromere protein W	CENPW	Q5EE01	387103	CENPW	0.203452	0.0224	0.164
Clinically diagnosed AD dementia versus CN	seq.19751.21	19751-21	Protein	Adenosine deaminase	ADA	P00813	100	ADA	-0.307944	0.0225	0.164
Clinically diagnosed AD dementia versus CN	seq.13485.20	13485-20	Protein	Transmembrane protein 87B	TM87B	Q96K49	84910	TMEM87B	-0.216691	0.0225	0.164
Clinically diagnosed AD dementia versus CN	seq.19613.16	19613-16	Protein	Retinol dehydrogenase 10	RDH10	Q8IZV5	157506	RDH10	-0.235137	0.0226	0.165
Clinically diagnosed AD dementia versus CN	seq.5196.7	5196-7	Protein	Glycylpeptide N-tetradecanoyltransferase 1	NMT1	P30419	4836	NMT1	0.370091	0.0227	0.165
Clinically diagnosed AD dementia versus CN	seq.17820.170	17820-170	Protein	Myeloid leukemia factor 1	MLF1	P58340	4291	MLF1	0.219108	0.0227	0.165
Clinically diagnosed AD dementia versus CN	seq.14326.4	14326-4	Protein	Ubiquitin-conjugating enzyme E2 E1	UB2E1	P51965	7324	UBE2E1	0.475916	0.0227	0.165
Clinically diagnosed AD dementia versus CN	seq.16836.1	16836-1	Protein	Complement factor H-related protein 3	FHR3	Q02985	10878	CFHR3	0.244466	0.0228	0.166
Clinically diagnosed AD dementia versus CN	seq.9795.9	9795-9	Protein	Ceroid-lipofuscinosis neuronal protein 5:Cytoplasmic domain	CLN5:CD	O75503	1203	CLN5	0.20485	0.0229	0.166
Clinically diagnosed AD dementia versus CN	seq.4212.5	4212-5	Protein	Epidermal growth factor receptor substrate 15-like 1	EP15R	Q9UBC2	58513	EPS15L1	0.479005	0.0229	0.166
Clinically diagnosed AD dementia versus CN	seq.3514.49	3514-49	Protein	Myeloblastin	Proteinase-3	P24158	5657	PRTN3	0.207396	0.0229	0.166
Clinically diagnosed AD dementia versus CN	seq.8359.149	8359-149	Protein	Serine/threonine-protein kinase 17B	DRAK2	O94768	9262	STK17B	0.258354	0.0229	0.166
Clinically diagnosed AD dementia versus CN	seq.3766.51	3766-51	Protein	Syntaxin-1A	STX1a	Q16623	6804	STX1A	0.212995	0.023	0.166
Clinically diagnosed AD dementia versus CN	seq.10025.1	10025-1	Protein	Dihydrolipoyl dehydrogenase, mitochondrial	DLDH	P09622	1738	DLD	0.21977	0.023	0.166
Clinically diagnosed AD dementia versus CN	seq.23694.3	23694-3	Protein	Asparagine synthetase	ASNS	P08243	440	ASNS	-0.259208	0.0231	0.166
Clinically diagnosed AD dementia versus CN	seq.25262.6	25262-6	Protein	Centromere/kinetochore protein zw10 homolog	ZW10	O43264	9183	ZW10	-0.19937	0.0231	0.166
Clinically diagnosed AD dementia versus CN	seq.25274.2	25274-2	Protein	Ankyrin repeat domain-containing protein 2	ANKR2	Q9GZV1	26287	ANKRD2	0.441815	0.0231	0.167
Clinically diagnosed AD dementia versus CN	seq.4480.59	4480-59	Protein	Complement C3b	C3b	P01024	718	C3	-0.215057	0.0231	0.167
Clinically diagnosed AD dementia versus CN	seq.18180.58	18180-58	Protein	Reticulon-4-interacting protein 1, mitochondrial	RT4I1	Q8WWV3	84816	RTN4IP1	0.450055	0.0232	0.167
Clinically diagnosed AD dementia versus CN	seq.5648.28	5648-28	Protein	Chymotrypsinogen B2	CTRB2	Q6GPI1	440387	CTRB2	0.20656	0.0233	0.167
Clinically diagnosed AD dementia versus CN	seq.25219.17	25219-17	Protein	V-type proton ATPase subunit F	VATF	Q16864	9296	ATP6V1F	0.262344	0.0233	0.167
Clinically diagnosed AD dementia versus CN	seq.23525.27	23525-27	Protein	Nitric oxide synthase-interacting protein	NOSIP	Q9Y314	51070	NOSIP	0.270668	0.0233	0.167
Clinically diagnosed AD dementia versus CN	seq.3291.30	3291-30	Protein	Low affinity immunoglobulin epsilon Fc receptor	CD23	P06734	2208	FCER2	-0.203875	0.0233	0.167
Clinically diagnosed AD dementia versus CN	seq.14708.59	14708-59	Protein	Complement component C8 gamma chain	CO8G	P07360	733	C8G	-0.221901	0.0233	0.167
Clinically diagnosed AD dementia versus CN	seq.12597.68	12597-68	Protein	Autophagy protein 5	Autophagy protein 5	Q9H1Y0	9474	ATG5	0.342868	0.0234	0.167
Clinically diagnosed AD dementia versus CN	seq.2982.82	2982-82	Protein	Galectin-4	Galectin-4	P56470	3960	LGALS4	0.224337	0.0234	0.167
Clinically diagnosed AD dementia versus CN	seq.21929.53	21929-53	Protein	UB2D3/PolyUbiquitin K48	UB2D3/ PolyUbiquitin K48	P61077|P0CG47	7323|7314	UBE2D3|UBB	-0.413776	0.0234	0.167
Clinically diagnosed AD dementia versus CN	seq.19797.4	19797-4	Protein	Histone acetyltransferase KAT2A	GCNL2	Q92830	2648	KAT2A	0.378194	0.0235	0.167
Clinically diagnosed AD dementia versus CN	seq.12960.9	12960-9	Protein	Glucokinase	HXK4	P35557	2645	GCK	0.365673	0.0235	0.167
Clinically diagnosed AD dementia versus CN	seq.3738.54	3738-54	Protein	Macrophage colony-stimulating factor 1	CSF-1	P09603	1435	CSF1	0.200573	0.0235	0.167
Clinically diagnosed AD dementia versus CN	seq.2514.65	2514-65	Protein	Ephrin-B3:Extracellular domain	Ephrin-B3:ECD	Q15768	1949	EFNB3	0.199279	0.0236	0.167
Clinically diagnosed AD dementia versus CN	seq.22839.23	22839-23	Protein	Zinc finger protein 263	ZN263	O14978	10127	ZNF263	-0.287399	0.0236	0.167
Clinically diagnosed AD dementia versus CN	seq.3400.49	3400-49	Protein	Serine/threonine-protein kinase TBK1	TBK1	Q9UHD2	29110	TBK1	0.17854	0.0236	0.167
Clinically diagnosed AD dementia versus CN	seq.14037.18	14037-18	Protein	Ran-binding protein 3	RANB3	Q9H6Z4	8498	RANBP3	0.23122	0.0237	0.168
Clinically diagnosed AD dementia versus CN	seq.9547.29	9547-29	Protein	EMI domain-containing protein 1	EMID1	Q96A84	129080	EMID1	0.22958	0.0237	0.168
Clinically diagnosed AD dementia versus CN	seq.10479.18	10479-18	Protein	Stromelysin-2	MMP-10	P09238	4319	MMP10	0.204893	0.0237	0.168
Clinically diagnosed AD dementia versus CN	seq.10418.36	10418-36	Protein	Syntaxin-12	STX12	Q86Y82	23673	STX12	0.265131	0.0238	0.168
Clinically diagnosed AD dementia versus CN	seq.24323.43	24323-43	Protein	BRO1 domain-containing protein BROX	BROX	Q5VW32	148362	BROX	-0.275873	0.0238	0.168
Clinically diagnosed AD dementia versus CN	seq.21154.8	21154-8	Protein	Calcium-binding protein 39-like	CB39L	Q9H9S4	81617	CAB39L	0.405934	0.0239	0.168
Clinically diagnosed AD dementia versus CN	seq.10069.2	10069-2	Protein	Peptidyl-prolyl cis-trans isomerase NIMA-interacting 1	PIN1	Q13526	5300	PIN1	0.213907	0.024	0.169
Clinically diagnosed AD dementia versus CN	seq.20995.47	20995-47	Protein	DNA-directed RNA polymerase II subunit RPB3	RPB3	P19387	5432	POLR2C	-0.191285	0.0244	0.172
Clinically diagnosed AD dementia versus CN	seq.3445.53	3445-53	Protein	Interleukin-15 receptor subunit alpha	IL-15 Ra	Q13261	3601	IL15RA	0.200832	0.0244	0.172
Clinically diagnosed AD dementia versus CN	seq.14273.19	14273-19	Protein	Prolyl endopeptidase	PPCE	P48147	5550	PREP	-0.369431	0.0245	0.172
Clinically diagnosed AD dementia versus CN	seq.11214.40	11214-40	Protein	DnaJ homolog subfamily B member 9	DNJB9	Q9UBS3	4189	DNAJB9	0.20323	0.0245	0.172
Clinically diagnosed AD dementia versus CN	seq.3499.77	3499-77	Protein	Interleukin-17B	IL-17B	Q9UHF5	27190	IL17B	0.210959	0.0246	0.172
Clinically diagnosed AD dementia versus CN	seq.3184.25	3184-25	Protein	Coagulation factor VII	Coagulation Factor VII	P08709	2155	F7	-0.21861	0.0247	0.173
Clinically diagnosed AD dementia versus CN	seq.22977.18	22977-18	Protein	Protein HEXIM1	HEXI1	O94992	10614	HEXIM1	0.255303	0.0247	0.173
Clinically diagnosed AD dementia versus CN	seq.19630.2	19630-2	Protein	Gamma-synuclein	g-Synuclein	O76070	6623	SNCG	0.252689	0.0247	0.173
Clinically diagnosed AD dementia versus CN	seq.12701.1	12701-1	Protein	Eukaryotic translation initiation factor 1b	EIF1B	O60739	10289	EIF1B	0.349144	0.0248	0.173
Clinically diagnosed AD dementia versus CN	seq.9126.171	9126-171	Protein	5'-nucleotidase domain-containing protein 3	NT5D3	Q86UY8	51559	NT5DC3	0.23263	0.0249	0.173
Clinically diagnosed AD dementia versus CN	seq.11361.73	11361-73	Protein	Thymidine phosphorylase	TP	P19971	1890	TYMP	0.327793	0.0249	0.174
Clinically diagnosed AD dementia versus CN	seq.21583.14	21583-14	Protein	60S ribosomal protein L26-like 1	RL26L	Q9UNX3	51121	RPL26L1	0.292745	0.0249	0.174
Clinically diagnosed AD dementia versus CN	seq.8383.20	8383-20	Protein	Uncharacterized protein C11orf94	CK094	C9JXX5	143678	None	0.225883	0.025	0.174
Clinically diagnosed AD dementia versus CN	seq.9981.18	9981-18	Protein	Protein FAM234B:C-term	K1467:C-term	A2RU67	57613	FAM234B	-0.272412	0.025	0.174
Clinically diagnosed AD dementia versus CN	seq.23522.1	23522-1	Protein	GTPase IMAP family member GIMD1	GIMD1	P0DJR0	100507096	GIMD1	-0.249797	0.025	0.174
Clinically diagnosed AD dementia versus CN	seq.5736.1	5736-1	Protein	Trem-like transcript 2 protein	TRML2	Q5T2D2	79865	TREML2	-0.19474	0.0251	0.174
Clinically diagnosed AD dementia versus CN	seq.19243.2	19243-2	Protein	Prefoldin subunit 2	PFD2	Q9UHV9	5202	PFDN2	0.26723	0.0252	0.174
Clinically diagnosed AD dementia versus CN	seq.9849.13	9849-13	Protein	DNA-(apurinic or apyrimidinic site) lyase	APEX1	P27695	328	APEX1	0.265579	0.0253	0.175
Clinically diagnosed AD dementia versus CN	seq.15343.337	15343-337	Protein	Kininogen, HMW, Two Chain	Kininogen, HMW, Two Chain	P01042	3827	KNG1	-0.250276	0.0253	0.175
Clinically diagnosed AD dementia versus CN	seq.17364.8	17364-8	Protein	U2 small nuclear ribonucleoprotein B''	RU2B	P08579	6629	SNRPB2	0.196055	0.0254	0.175
Clinically diagnosed AD dementia versus CN	seq.17738.7	17738-7	Protein	Cornulin	CRNN	Q9UBG3	49860	CRNN	0.197817	0.0254	0.175
Clinically diagnosed AD dementia versus CN	seq.15300.66	15300-66	Protein	Coiled-coil domain-containing protein 134	CC134	Q9H6E4	79879	CCDC134	0.465523	0.0254	0.175
Clinically diagnosed AD dementia versus CN	seq.12954.71	12954-71	Protein	Peroxisome proliferator-activated receptor alpha	PPARa	Q07869	5465	PPARA	0.252966	0.0255	0.176
Clinically diagnosed AD dementia versus CN	seq.3083.71	3083-71	Protein	Tumor necrosis factor receptor superfamily member 27	XEDAR	Q9HAV5	60401	EDA2R	0.179269	0.0256	0.176
Clinically diagnosed AD dementia versus CN	seq.13130.150	13130-150	Protein	Hexokinase-2	HXK2	P52789	3099	HK2	0.190699	0.0257	0.177
Clinically diagnosed AD dementia versus CN	seq.18458.4	18458-4	Protein	Prostaglandin E synthase 2	PGES2	Q9H7Z7	80142	PTGES2	0.419708	0.0257	0.177
Clinically diagnosed AD dementia versus CN	seq.5107.7	5107-7	Protein	Neurogenic locus notch homolog protein 1	Notch 1	P46531	4851	NOTCH1	-0.254336	0.0257	0.177
Clinically diagnosed AD dementia versus CN	seq.6425.87	6425-87	Protein	Matrix metalloproteinase-19	MMP19	Q99542	4327	MMP19	0.196112	0.0258	0.177
Clinically diagnosed AD dementia versus CN	seq.5885.55	5885-55	Protein	Eukaryotic translation initiation factor 4H	eIF-4H	Q15056	7458	EIF4H	-0.563972	0.0258	0.177
Clinically diagnosed AD dementia versus CN	seq.3081.70	3081-70	Protein	NKG2D ligand 1	ULBP-1	Q9BZM6	80329	ULBP1	0.194865	0.0259	0.177
Clinically diagnosed AD dementia versus CN	seq.17202.37	17202-37	Protein	Programmed cell death protein 4	PDCD4	Q53EL6	27250	PDCD4	-0.285181	0.0259	0.177
Clinically diagnosed AD dementia versus CN	seq.18289.16	18289-16	Protein	C-C motif chemokine 15	MIP-5	Q16663	6359	CCL15	0.196078	0.026	0.177
Clinically diagnosed AD dementia versus CN	seq.13973.62	13973-62	Protein	Tubulin--tyrosine ligase	TTL	Q8NG68	150465	TTL	0.308112	0.026	0.177
Clinically diagnosed AD dementia versus CN	seq.9997.12	9997-12	Protein	UBX domain-containing protein 4:Cytoplasmic domain 1	UBXN4:CD 1	Q92575	23190	UBXN4	-0.534567	0.026	0.177
Clinically diagnosed AD dementia versus CN	seq.10447.18	10447-18	Protein	Polyadenylate-binding protein 3	PABP3	Q9H361	5042	PABPC3	0.442744	0.026	0.177
Clinically diagnosed AD dementia versus CN	seq.19296.51	19296-51	Protein	Myosin regulatory light chain 2, atrial isoform	MLRA	Q01449	58498	MYL7	-0.20284	0.0261	0.177
Clinically diagnosed AD dementia versus CN	seq.25054.15	25054-15	Protein	Pre-mRNA-processing factor 19	PRP19	Q9UMS4	27339	PRPF19	0.237606	0.0261	0.177
Clinically diagnosed AD dementia versus CN	seq.15574.37	15574-37	Protein	Cyclin-A2	Cyclin A	P20248	890	CCNA2	0.238743	0.0261	0.177
Clinically diagnosed AD dementia versus CN	seq.19553.14	19553-14	Protein	Syntaxin-1A	STX1a	Q16623	6804	STX1A	0.203335	0.0262	0.178
Clinically diagnosed AD dementia versus CN	seq.20378.110	20378-110	Protein	Leucine zipper transcription factor-like protein 1	LZTL1	Q9NQ48	54585	LZTFL1	0.692807	0.0263	0.178
Clinically diagnosed AD dementia versus CN	seq.22858.3	22858-3	Protein	Mitogen-activated protein kinase 6	MK06	Q16659	5597	MAPK6	-0.217012	0.0263	0.178
Clinically diagnosed AD dementia versus CN	seq.9482.110	9482-110	Protein	ADP-ribose pyrophosphatase, mitochondrial	NUDT9	Q9BW91	53343	NUDT9	0.242075	0.0265	0.179
Clinically diagnosed AD dementia versus CN	seq.11661.11	11661-11	Protein	NACHT, LRR and PYD domains-containing protein 1	NALP1	Q9C000	22861	NLRP1	-0.2949	0.0265	0.179
Clinically diagnosed AD dementia versus CN	seq.6420.4	6420-4	Protein	Succinate dehydrogenase assembly factor 2, mitochondrial	SDHF2	Q9NX18	54949	SDHAF2	0.270835	0.0266	0.18
Clinically diagnosed AD dementia versus CN	seq.21109.1	21109-1	Protein	Cilia- and flagella-associated protein 36	CFA36	Q96G28	112942	CFAP36	0.423122	0.0266	0.18
Clinically diagnosed AD dementia versus CN	seq.25281.50	25281-50	Protein	Dipeptidyl peptidase 8	DPP8	Q6V1X1	54878	DPP8	-0.268361	0.0267	0.18
Clinically diagnosed AD dementia versus CN	seq.8958.51	8958-51	Protein	Neural cell adhesion molecule L1-like protein	CHL1	O00533	10752	CHL1	0.19692	0.0267	0.18
Clinically diagnosed AD dementia versus CN	seq.9851.9	9851-9	Protein	Fatty acid-binding protein, adipocyte	FABPA	P15090	2167	FABP4	-0.221514	0.0268	0.18
Clinically diagnosed AD dementia versus CN	seq.7852.9	7852-9	Protein	Translation initiation factor IF-3, mitochondrial	IF3M	Q9H2K0	219402	MTIF3	-0.542006	0.0268	0.18
Clinically diagnosed AD dementia versus CN	seq.19482.11	19482-11	Protein	Haloacid dehalogenase-like hydrolase domain-containing protein 3	HDHD3	Q9BSH5	81932	HDHD3	0.220598	0.0269	0.181
Clinically diagnosed AD dementia versus CN	seq.21989.12	21989-12	Protein	Mitogen-activated protein kinase kinase kinase kinase 5	M4K5	Q9Y4K4	11183	MAP4K5	-0.524528	0.0269	0.181
Clinically diagnosed AD dementia versus CN	seq.2715.25	2715-25	Protein	Erythropoietin receptor	EPO-R	P19235	2057	EPOR	0.264225	0.027	0.181
Clinically diagnosed AD dementia versus CN	seq.6899.37	6899-37	Protein	Pterin-4-alpha-carbinolamine dehydratase 2	PHS2	Q9H0N5	84105	PCBD2	0.235933	0.027	0.181
Clinically diagnosed AD dementia versus CN	seq.13377.3	13377-3	Protein	Cytochrome b561 domain-containing protein 1	C56D1	Q8N8Q1	284613	CYB561D1	0.230085	0.0271	0.181
Clinically diagnosed AD dementia versus CN	seq.3341.33	3341-33	Protein	Tyrosine-protein kinase ABL1	ABL1	P00519	25	ABL1	0.194684	0.0271	0.181
Clinically diagnosed AD dementia versus CN	seq.3796.79	3796-79	Protein	Angiopoietin-related protein 4	ANGL4	Q9BY76	51129	ANGPTL4	0.198131	0.0271	0.181
Clinically diagnosed AD dementia versus CN	seq.4254.6	4254-6	Protein	NudC domain-containing protein 3	NUDC3	Q8IVD9	23386	NUDCD3	0.249745	0.0271	0.181
Clinically diagnosed AD dementia versus CN	seq.24687.18	24687-18	Protein	Alpha-tocopherol transfer protein-like	TTPAL	Q9BTX7	79183	TTPAL	0.375437	0.0273	0.182
Clinically diagnosed AD dementia versus CN	seq.24634.1	24634-1	Protein	Protein ripply3	DSCR6	P57055	53820	RIPPLY3	0.186415	0.0273	0.182
Clinically diagnosed AD dementia versus CN	seq.18315.38	18315-38	Protein	Receptor-transporting protein 4	RTP4	Q96DX8	64108	RTP4	0.289505	0.0273	0.182
Clinically diagnosed AD dementia versus CN	seq.3025.50	3025-50	Protein	Fibroblast growth factor 2	bFGF	P09038	2247	FGF2	0.18816	0.0273	0.182
Clinically diagnosed AD dementia versus CN	seq.5129.12	5129-12	Protein	Scavenger receptor class F member 1	SREC-I	Q14162	8578	SCARF1	0.236485	0.0273	0.182
Clinically diagnosed AD dementia versus CN	seq.24693.5	24693-5	Protein	Chloride intracellular channel protein 3	CLIC3	O95833	9022	CLIC3	0.224408	0.0274	0.182
Clinically diagnosed AD dementia versus CN	seq.10818.36	10818-36	Protein	Sphingomyelin phosphodiesterase	ASM	P17405	6609	SMPD1	0.202846	0.0275	0.182
Clinically diagnosed AD dementia versus CN	seq.11227.31	11227-31	Protein	Transducin beta-like protein 2	TBL2	Q9Y4P3	26608	TBL2	-0.686747	0.0275	0.182
Clinically diagnosed AD dementia versus CN	seq.4910.21	4910-21	Protein	Phospholipase A2	GIB	P04054	5319	PLA2G1B	0.228164	0.0277	0.183
Clinically diagnosed AD dementia versus CN	seq.4309.59	4309-59	Protein	Triosephosphate isomerase	Triosephosphate isomerase	P60174	7167	TPI1	-0.798205	0.0278	0.183
Clinically diagnosed AD dementia versus CN	seq.21811.20	21811-20	Protein	Nucleolar protein of 40 kDa	NO40	Q9NP64	51538	ZCCHC17	0.206217	0.0278	0.183
Clinically diagnosed AD dementia versus CN	seq.13944.3	13944-3	Protein	Sulfotransferase 1A3	SULT 1A3	P0DMM9	445329	SULT1A3	0.320431	0.0278	0.183
Clinically diagnosed AD dementia versus CN	seq.24971.2	24971-2	Protein	Phosphatidylinositide phosphatase SAC2	SAC2	Q9Y2H2	22876	INPP5F	-0.343971	0.0278	0.183
Clinically diagnosed AD dementia versus CN	seq.21121.31	21121-31	Protein	NEDD8-activating enzyme E1 catalytic subunit	UBA3	Q8TBC4	9039	UBA3	-0.234423	0.0279	0.183
Clinically diagnosed AD dementia versus CN	seq.4374.45	4374-45	Protein	Growth/differentiation factor 15	MIC-1	Q99988	9518	GDF15	0.218875	0.0279	0.183
Clinically diagnosed AD dementia versus CN	seq.19266.35	19266-35	Protein	Ras GTPase-activating protein-binding protein 1	G3BP1	Q13283	10146	G3BP1	-0.708015	0.0279	0.183
Clinically diagnosed AD dementia versus CN	seq.3622.33	3622-33	Protein	Legumain	LGMN	Q99538	5641	LGMN	0.196459	0.0279	0.183
Clinically diagnosed AD dementia versus CN	seq.11651.24	11651-24	Protein	Protein argonaute-1	AGO1	Q9UL18	26523	AGO1	0.245064	0.028	0.184
Clinically diagnosed AD dementia versus CN	seq.13515.8	13515-8	Protein	Regulation of nuclear pre-mRNA domain-containing protein 1A	RPR1A	Q96P16	55197	RPRD1A	0.193576	0.0281	0.184
Clinically diagnosed AD dementia versus CN	seq.17823.40	17823-40	Protein	Small nuclear ribonucleoprotein Sm D2	SMD2	P62316	6633	SNRPD2	0.325602	0.0281	0.184
Clinically diagnosed AD dementia versus CN	seq.11258.41	11258-41	Protein	Mucosal addressin cell adhesion molecule 1	MAdCAM-1	Q13477	8174	MADCAM1	0.383777	0.0281	0.184
Clinically diagnosed AD dementia versus CN	seq.4194.26	4194-26	Protein	Acidic leucine-rich nuclear phosphoprotein 32 family member B	AN32B	Q92688	10541	ANP32B	0.215303	0.0281	0.184
Clinically diagnosed AD dementia versus CN	seq.15495.9	15495-9	Protein	Folate receptor gamma	FOLR3	P41439	2352	FOLR3	0.198583	0.0283	0.185
Clinically diagnosed AD dementia versus CN	seq.10970.3	10970-3	Protein	Ecto-ADP-ribosyltransferase 3	NAR3	Q13508	419	ART3	0.20979	0.0284	0.185
Clinically diagnosed AD dementia versus CN	seq.21387.64	21387-64	Protein	Meprin A subunit alpha	MEP1A	Q16819	4224	MEP1A	0.243761	0.0284	0.185
Clinically diagnosed AD dementia versus CN	seq.19145.4	19145-4	Protein	Melanoregulin	MREG	Q8N565	55686	MREG	-0.201472	0.0286	0.186
Clinically diagnosed AD dementia versus CN	seq.17805.35	17805-35	Protein	Survival of motor neuron-related-splicing factor 30	SPF30	O75940	10285	SMNDC1	0.191273	0.0286	0.186
Clinically diagnosed AD dementia versus CN	seq.23288.28	23288-28	Protein	Leucine-rich repeat-containing protein 20	LRC20	Q8TCA0	55222	LRRC20	0.186945	0.0286	0.186
Clinically diagnosed AD dementia versus CN	seq.3847.56	3847-56	Protein	Persulfide dioxygenase ETHE1, mitochondrial	ETHE1	O95571	23474	ETHE1	0.202428	0.0286	0.186
Clinically diagnosed AD dementia versus CN	seq.2841.13	2841-13	Protein	Secreted frizzled-related protein 3	sFRP-3	Q92765	2487	FRZB	-0.345556	0.0287	0.186
Clinically diagnosed AD dementia versus CN	seq.13712.104	13712-104	Protein	Granzyme A	granzyme A	P12544	3001	GZMA	0.209906	0.0287	0.186
Clinically diagnosed AD dementia versus CN	seq.19392.6	19392-6	Protein	N(G),N(G)-dimethylarginine dimethylaminohydrolase 1	DDAH1	O94760	23576	DDAH1	0.215762	0.0288	0.187
Clinically diagnosed AD dementia versus CN	seq.7893.19	7893-19	Protein	Oxidized low-density lipoprotein receptor 1	OLR1	P78380	4973	OLR1	0.199651	0.0289	0.187
Clinically diagnosed AD dementia versus CN	seq.15560.52	15560-52	Protein	Transcobalamin-2	Apo-TC II	P20062	6948	TCN2	-0.190227	0.029	0.188
Clinically diagnosed AD dementia versus CN	seq.21913.5	21913-5	Protein	Transcription factor YY2	TYY2	O15391	404281	YY2	0.207903	0.0291	0.188
Clinically diagnosed AD dementia versus CN	seq.21289.36	21289-36	Protein	Sperm-associated antigen 7	Sperm-associated antigen 7	O75391	9552	SPAG7	0.26456	0.0291	0.188
Clinically diagnosed AD dementia versus CN	seq.12658.72	12658-72	Protein	Pantothenate kinase 3	PANK3	Q9H999	79646	PANK3	0.486168	0.0292	0.188
Clinically diagnosed AD dementia versus CN	seq.19602.36	19602-36	Protein	Transcription factor jun-D	jun-D	P17535	3727	JUND	0.199601	0.0292	0.188
Clinically diagnosed AD dementia versus CN	seq.24490.16	24490-16	Protein	THAP domain-containing protein 4	THAP4	Q8WY91	51078	THAP4	0.2029	0.0293	0.189
Clinically diagnosed AD dementia versus CN	seq.21925.15	21925-15	Protein	Transforming growth factor beta-1	TGF-b1	P01137	7040	TGFB1	0.186415	0.0293	0.189
Clinically diagnosed AD dementia versus CN	seq.2806.49	2806-49	Protein	Activin receptor type-1B	Activin RIB	P36896	91	ACVR1B	0.191855	0.0294	0.189
Clinically diagnosed AD dementia versus CN	seq.2838.53	2838-53	Protein	Matrix metalloproteinase-17	MMP-17	Q9ULZ9	4326	MMP17	0.220665	0.0295	0.189
Clinically diagnosed AD dementia versus CN	seq.8393.121	8393-121	Protein	Cathepsin F	CATF	Q9UBX1	8722	CTSF	0.213659	0.0295	0.189
Clinically diagnosed AD dementia versus CN	seq.3773.15	3773-15	Protein	Angiopoietin-1 receptor, soluble	sTie-2	Q02763	7010	TEK	-0.202336	0.0297	0.19
Clinically diagnosed AD dementia versus CN	seq.23296.29	23296-29	Protein	SARP-3	SARP-3	Q5T4F7	6425	SFRP5	0.200375	0.0298	0.191
Clinically diagnosed AD dementia versus CN	seq.19606.28	19606-28	Protein	Indian hedgehog protein	ihh	Q14623	3549	IHH	0.209298	0.0298	0.191
Clinically diagnosed AD dementia versus CN	seq.12815.9	12815-9	Protein	Isoleucine--tRNA ligase, cytoplasmic	SYIC	P41252	3376	IARS1	-0.239758	0.03	0.192
Clinically diagnosed AD dementia versus CN	seq.4543.65	4543-65	Protein	Collagen alpha-1(XXIII) chain	CONA1	Q86Y22	91522	COL23A1	0.26981	0.03	0.192
Clinically diagnosed AD dementia versus CN	seq.10760.107	10760-107	Protein	Glutamate receptor 4	GRIA4	P48058	2893	GRIA4	0.249729	0.0301	0.192
Clinically diagnosed AD dementia versus CN	seq.3290.50	3290-50	Protein	CD109 antigen	CD109	Q6YHK3	135228	CD109	-0.206351	0.0302	0.192
Clinically diagnosed AD dementia versus CN	seq.19809.47	19809-47	Protein	DNA-directed RNA polymerase II subunit RPB9	RPB9	P36954	5438	POLR2I	0.20277	0.0302	0.192
Clinically diagnosed AD dementia versus CN	seq.4996.66	4996-66	Protein	Histidine-rich glycoprotein	HRG	P04196	3273	HRG	-0.191867	0.0303	0.193
Clinically diagnosed AD dementia versus CN	seq.5088.175	5088-175	Protein	Interleukin-23 receptor	IL-23 R	Q5VWK5	149233	IL23R	0.228655	0.0306	0.195
Clinically diagnosed AD dementia versus CN	seq.7897.75	7897-75	Protein	Disks large homolog 3	DLG3	Q92796	1741	DLG3	0.23209	0.0306	0.195
Clinically diagnosed AD dementia versus CN	seq.12676.1	12676-1	Protein	Protein kinase C and casein kinase substrate in neurons protein 1	PACN1	Q9BY11	29993	PACSIN1	0.380818	0.0307	0.195
Clinically diagnosed AD dementia versus CN	seq.4567.82	4567-82	Protein	SH2 domain-containing protein 1A	SH21A	O60880	4068	SH2D1A	0.207138	0.0307	0.195
Clinically diagnosed AD dementia versus CN	seq.24436.23	24436-23	Protein	Disks large-associated protein 4	DLGP4	Q9Y2H0	22839	DLGAP4	-0.630364	0.0307	0.195
Clinically diagnosed AD dementia versus CN	seq.12510.3	12510-3	Protein	Signal-transducing adaptor protein 1	STAP1	Q9ULZ2	26228	STAP1	-0.225677	0.0308	0.195
Clinically diagnosed AD dementia versus CN	seq.4717.55	4717-55	Protein	Interleukin-3	IL-3	P08700	3562	IL3	0.192169	0.0308	0.195
Clinically diagnosed AD dementia versus CN	seq.11219.95	11219-95	Protein	Fibroblast growth factor-binding protein 3	FGFP3	Q8TAT2	143282	FGFBP3	0.258442	0.031	0.196
Clinically diagnosed AD dementia versus CN	seq.12988.49	12988-49	Protein	RNA-binding protein EWS	EWS	Q01844	2130	EWSR1	0.194294	0.0311	0.196
Clinically diagnosed AD dementia versus CN	seq.24892.8	24892-8	Protein	Testicular spindle-associated protein SHCBP1L	SHP1L	Q9BZQ2	81626	SHCBP1L	-0.302833	0.0311	0.196
Clinically diagnosed AD dementia versus CN	seq.11476.43	11476-43	Protein	Vacuolar protein sorting-associated protein 4A	VPS4A	Q9UN37	27183	VPS4A	-0.570315	0.0313	0.197
Clinically diagnosed AD dementia versus CN	seq.10974.20	10974-20	Protein	Serine protease inhibitor Kazal-type 7	ISK7	P58062	84651	SPINK7	0.205549	0.0314	0.197
Clinically diagnosed AD dementia versus CN	seq.12661.44	12661-44	Protein	Gamma-aminobutyric acid receptor-associated protein-like 1	GBRL1	Q9H0R8	23710	GABARAPL1	0.212758	0.0314	0.197
Clinically diagnosed AD dementia versus CN	seq.2849.49	2849-49	Protein	Allograft inflammatory factor 1	AIF1	P55008	199	AIF1	0.339687	0.0315	0.197
Clinically diagnosed AD dementia versus CN	seq.9110.2	9110-2	Protein	Synaptotagmin-17	SYT17	Q9BSW7	51760	SYT17	0.185386	0.0315	0.197
Clinically diagnosed AD dementia versus CN	seq.8921.139	8921-139	Protein	Polyadenylate-binding protein 2	PABP2	Q86U42	8106	PABPN1	0.239303	0.0315	0.197
Clinically diagnosed AD dementia versus CN	seq.12619.14	12619-14	Protein	Protein phosphatase 1A	Protein phophatase 2Ca	P35813	5494	PPM1A	-0.248624	0.0315	0.197
Clinically diagnosed AD dementia versus CN	seq.9183.7	9183-7	Protein	Interferon alpha/beta receptor 1	IFN-a/b R1	P17181	3454	IFNAR1	-0.251001	0.0315	0.197
Clinically diagnosed AD dementia versus CN	seq.12594.5	12594-5	Protein	Grancalcin	GRAN	P28676	25801	GCA	0.200483	0.0315	0.197
Clinically diagnosed AD dementia versus CN	seq.10490.3	10490-3	Protein	Dolichyl-diphosphooligosaccharide--protein glycosyltransferase subunit 1:Cytoplasmic domain	RPN1:CD	P04843	6184	RPN1	0.261716	0.0317	0.198
Clinically diagnosed AD dementia versus CN	seq.6022.57	6022-57	Protein	Protein kinase C-binding protein NELL2	NELL2	Q99435	4753	NELL2	0.226598	0.0317	0.199
Clinically diagnosed AD dementia versus CN	seq.21799.15	21799-15	Protein	Homer protein homolog 3	HOME3	Q9NSC5	9454	HOMER3	-0.27061	0.0318	0.199
Clinically diagnosed AD dementia versus CN	seq.16872.248	16872-248	Protein	Maleylacetoacetate isomerase	MAAI	O43708	2954	GSTZ1	0.20194	0.0318	0.199
Clinically diagnosed AD dementia versus CN	seq.6653.58	6653-58	Protein	Leukocyte surface antigen CD47	CD47	Q08722	961	CD47	0.266771	0.0318	0.199
Clinically diagnosed AD dementia versus CN	seq.21756.5	21756-5	Protein	UBE2N/UBE2V2 Complex	UBE2N/UBE2V2 Complex	P61088|Q15819	7334|7336	UBE2N|UBE2V2	-0.577411	0.0318	0.199
Clinically diagnosed AD dementia versus CN	seq.23387.18	23387-18	Protein	TIP41-like protein	TIPRL	O75663	261726	TIPRL	-0.587219	0.0319	0.199
Clinically diagnosed AD dementia versus CN	seq.11192.168	11192-168	Protein	Tubulointerstitial nephritis antigen-like	TINAL	Q9GZM7	64129	TINAGL1	0.214236	0.032	0.199
Clinically diagnosed AD dementia versus CN	seq.3505.6	3505-6	Protein	Lymphotoxin alpha1:beta2	Lymphotoxin a1/b2	P01374|Q06643	4049|4050	LTA|LTB	-0.229047	0.0322	0.2
Clinically diagnosed AD dementia versus CN	seq.19136.22	19136-22	Protein	Methylmalonate-semialdehyde dehydrogenase [acylating], mitochondrial	MMSA	Q02252	4329	ALDH6A1	-0.46174	0.0322	0.2
Clinically diagnosed AD dementia versus CN	seq.21991.79	21991-79	Protein	Neurabin-2	NEB2	Q96SB3	84687	PPP1R9B	-0.478523	0.0322	0.2
Clinically diagnosed AD dementia versus CN	seq.20141.42	20141-42	Protein	Transcription elongation factor A protein 2	TCEA2	Q15560	6919	TCEA2	0.196945	0.0323	0.2
Clinically diagnosed AD dementia versus CN	seq.3852.19	3852-19	Protein	DnaJ homolog subfamily B member 1	HSP 40	P25685	3337	DNAJB1	0.609096	0.0323	0.2
Clinically diagnosed AD dementia versus CN	seq.15603.20	15603-20	Protein	Integrin alpha-2	Integrin alpha-2	P17301	3673	ITGA2	-0.207032	0.0324	0.2
Clinically diagnosed AD dementia versus CN	seq.23559.10	23559-10	Protein	DDRGK domain-containing protein 1	DDRGK	Q96HY6	65992	DDRGK1	0.386255	0.0325	0.201
Clinically diagnosed AD dementia versus CN	seq.19168.71	19168-71	Protein	Proline-serine-threonine phosphatase-interacting protein 1	PPIP1	O43586	9051	PSTPIP1	0.211342	0.0325	0.201
Clinically diagnosed AD dementia versus CN	seq.15435.4	15435-4	Protein	Purine nucleoside phosphorylase	PNP	P00491	4860	PNP	-0.552596	0.0325	0.201
Clinically diagnosed AD dementia versus CN	seq.3484.60	3484-60	Protein	Angiotensinogen	Angiotensinogen	P01019	183	AGT	0.261934	0.0325	0.201
Clinically diagnosed AD dementia versus CN	seq.23542.8	23542-8	Protein	Golgi phosphoprotein 3-like	GLP3L	Q9H4A5	55204	GOLPH3L	-0.36052	0.0326	0.201
Clinically diagnosed AD dementia versus CN	seq.3170.6	3170-6	Protein	Methionine aminopeptidase 2	AMPM2	P50579	10988	METAP2	0.251757	0.0327	0.201
Clinically diagnosed AD dementia versus CN	seq.12670.15	12670-15	Protein	Cell cycle checkpoint protein RAD1	RAD1	O60671	5810	RAD1	0.212888	0.0328	0.202
Clinically diagnosed AD dementia versus CN	seq.2946.52	2946-52	Protein	Complement factor D	Factor D	P00746	1675	CFD	-0.241591	0.0329	0.202
Clinically diagnosed AD dementia versus CN	seq.23623.48	23623-48	Protein	Diphosphoinositol polyphosphate phosphohydrolase 3-beta	NUD11	Q96G61	55190	NUDT11	0.282177	0.0331	0.203
Clinically diagnosed AD dementia versus CN	seq.22537.5	22537-5	Protein	Protein phosphatase PTC7 homolog	PPTC7	Q8NI37	160760	PPTC7	-0.227951	0.0331	0.203
Clinically diagnosed AD dementia versus CN	seq.18395.5	18395-5	Protein	[Protein ADP-ribosylarginine] hydrolase	ADPRH	P54922	141	ADPRH	0.187806	0.0332	0.203
Clinically diagnosed AD dementia versus CN	seq.14085.28	14085-28	Protein	Interleukin-13	IL-13	P35225	3596	IL13	-0.249632	0.0332	0.203
Clinically diagnosed AD dementia versus CN	seq.13510.7	13510-7	Protein	Sarcoplasmic/endoplasmic reticulum calcium ATPase 3	AT2A3	Q93084	489	ATP2A3	-0.242017	0.0333	0.204
Clinically diagnosed AD dementia versus CN	seq.14662.6	14662-6	Protein	Myeloid zinc finger 1	MZF1	P28698	7593	MZF1	-0.222612	0.0333	0.204
Clinically diagnosed AD dementia versus CN	seq.14260.112	14260-112	Protein	Neuroepithelial cell-transforming gene 1 protein	ARHG8	Q7Z628	10276	NET1	0.164833	0.0334	0.204
Clinically diagnosed AD dementia versus CN	seq.18327.6	18327-6	Protein	Sorting nexin-5	SNX5	Q9Y5X3	27131	SNX5	-0.69723	0.0336	0.205
Clinically diagnosed AD dementia versus CN	seq.23567.37	23567-37	Protein	Guanine nucleotide-binding protein G(q) subunit alpha	GNAQ	P50148	2776	GNAQ	0.380266	0.0336	0.205
Clinically diagnosed AD dementia versus CN	seq.25947.116	25947-116	Protein	Phosphatidylinositol 3-kinase catalytic subunit type 3	PK3C3	Q8NEB9	5289	PIK3C3	-0.244962	0.0336	0.205
Clinically diagnosed AD dementia versus CN	seq.4859.6	4859-6	Protein	Bone morphogenetic protein receptor type-1A	BMPR1A	P36894	657	BMPR1A	-0.209245	0.0336	0.205
Clinically diagnosed AD dementia versus CN	seq.21769.10	21769-10	Protein	Xylulose kinase	XYLB	O75191	9942	XYLB	0.190823	0.0338	0.206
Clinically diagnosed AD dementia versus CN	seq.12976.49	12976-49	Protein	Vinexin b	Vinexin b	O60504	10174	SORBS3	0.188256	0.034	0.207
Clinically diagnosed AD dementia versus CN	seq.23767.1	23767-1	Protein	UPF0705 protein C11orf49	CK049	Q9H6J7	79096	C11orf49	0.201645	0.0341	0.207
Clinically diagnosed AD dementia versus CN	seq.22978.13	22978-13	Protein	High mobility group protein B2	HMG-2	P26583	3148	HMGB2	0.204996	0.0341	0.207
Clinically diagnosed AD dementia versus CN	seq.14329.4	14329-4	Protein	Death-inducer obliterator 1	DIDO1	Q9BTC0	11083	DIDO1	0.17625	0.0341	0.207
Clinically diagnosed AD dementia versus CN	seq.11683.19	11683-19	Protein	ADP-ribosylation factor-binding protein GGA3	GGA3	Q9NZ52	23163	GGA3	-0.883932	0.0342	0.207
Clinically diagnosed AD dementia versus CN	seq.9028.5	9028-5	Protein	Poly(A) RNA polymerase, mitochondrial	PAPD1	Q9NVV4	55149	MTPAP	0.230633	0.0343	0.208
Clinically diagnosed AD dementia versus CN	seq.6384.19	6384-19	Protein	WAP four-disulfide core domain protein 3	WFDC3	Q8IUB2	140686	WFDC3	0.592851	0.0344	0.208
Clinically diagnosed AD dementia versus CN	seq.23156.146	23156-146	Protein	Caspase-10:region 2	Caspase-10:region 2	Q92851	843	CASP10	-0.219827	0.0346	0.209
Clinically diagnosed AD dementia versus CN	seq.15339.32	15339-32	Protein	Cofilin-2	COF2	Q9Y281	1073	CFL2	0.202272	0.0346	0.209
Clinically diagnosed AD dementia versus CN	seq.12861.13	12861-13	Protein	Tropomodulin-3	TMOD3	Q9NYL9	29766	TMOD3	-0.332791	0.0347	0.209
Clinically diagnosed AD dementia versus CN	seq.13978.122	13978-122	Protein	T-box transcription factor TBX3	Tbx3	O15119	6926	TBX3	-0.239198	0.0347	0.21
Clinically diagnosed AD dementia versus CN	seq.16802.31	16802-31	Protein	OCIA domain-containing protein 1	OCAD1	Q9NX40	54940	OCIAD1	-0.201119	0.0348	0.21
Clinically diagnosed AD dementia versus CN	seq.8990.42	8990-42	Protein	Sodium/potassium-transporting ATPase subunit beta-3	AT1B3	P54709	483	ATP1B3	-0.206147	0.0348	0.21
Clinically diagnosed AD dementia versus CN	seq.17161.1	17161-1	Protein	Dolichyl-diphosphooligosaccharide--protein glycosyltransferase 48 kDa subunit	OST48	P39656	1650	DDOST	0.309368	0.0349	0.21
Clinically diagnosed AD dementia versus CN	seq.7965.25	7965-25	Protein	Hemoglobin subunit theta-1	HBAT	P09105	3049	HBQ1	-0.184543	0.035	0.21
Clinically diagnosed AD dementia versus CN	seq.22529.31	22529-31	Protein	PHD finger protein 6	PHF6	Q8IWS0	84295	PHF6	0.194386	0.0351	0.211
Clinically diagnosed AD dementia versus CN	seq.8909.77	8909-77	Protein	Glucosamine-6-phosphate isomerase 1	GNPI1	P46926	10007	GNPDA1	0.185971	0.0351	0.211
Clinically diagnosed AD dementia versus CN	seq.17793.4	17793-4	Protein	GTP-binding protein Di-Ras1	DIRA1	O95057	148252	DIRAS1	0.175082	0.0352	0.211
Clinically diagnosed AD dementia versus CN	seq.7967.38	7967-38	Protein	Putative POTE ankyrin domain family member M	POTEM	A6NI47	641455	POTEM	-0.25732	0.0352	0.211
Clinically diagnosed AD dementia versus CN	seq.5261.13	5261-13	Protein	Abelson tyrosine-protein kinase 2	ABL2	P42684	27	ABL2	0.216489	0.0352	0.211
Clinically diagnosed AD dementia versus CN	seq.24713.4	24713-4	Protein	PDZ domain-containing protein MAGIX	MAGIX	Q9H6Y5	79917	MAGIX	0.187355	0.0354	0.212
Clinically diagnosed AD dementia versus CN	seq.6543.182	6543-182	Protein	Prolactin-releasing peptide	PRRP	P81277	51052	PRLH	0.187215	0.0355	0.212
Clinically diagnosed AD dementia versus CN	seq.21861.8	21861-8	Protein	Proteasome subunit beta type-10	PSB10	P40306	5699	PSMB10	-0.199843	0.0356	0.213
Clinically diagnosed AD dementia versus CN	seq.21688.50	21688-50	Protein	Very Late Antigen-4	VLA-4	P13612|P05556	3676|3688	ITGA4|ITGB1	-0.193013	0.0357	0.213
Clinically diagnosed AD dementia versus CN	seq.3642.4	3642-4	Protein	SLAM family member 5	SLAF5	Q9UIB8	8832	CD84	0.251547	0.0357	0.213
Clinically diagnosed AD dementia versus CN	seq.13516.46	13516-46	Protein	ER membrane protein complex subunit 4	TMM85	Q5J8M3	51234	EMC4	0.202842	0.0359	0.214
Clinically diagnosed AD dementia versus CN	seq.5097.14	5097-14	Protein	Killer cell immunoglobulin-like receptor 3DS1	KI3S1	Q14943	3813	KIR3DS1	0.199487	0.0359	0.214
Clinically diagnosed AD dementia versus CN	seq.17799.9	17799-9	Protein	6-phosphogluconolactonase	6PGL	O95336	25796	PGLS	0.653283	0.0361	0.215
Clinically diagnosed AD dementia versus CN	seq.18337.4	18337-4	Protein	GDP-mannose 4,6 dehydratase	GMDS	O60547	2762	GMDS	0.165735	0.0363	0.216
Clinically diagnosed AD dementia versus CN	seq.11490.42	11490-42	Protein	Ubiquitin-like protein 4A	UBL4A	P11441	8266	UBL4A	0.45775	0.0363	0.216
Clinically diagnosed AD dementia versus CN	seq.18416.3	18416-3	Protein	ADP-ribosylation factor-like protein 9	ARL9	Q6T311	132946	ARL9	0.209953	0.0363	0.216
Clinically diagnosed AD dementia versus CN	seq.9808.41	9808-41	Protein	Trinucleotide repeat-containing gene 6B protein	TNR6B	Q9UPQ9	23112	TNRC6B	0.262187	0.0364	0.216
Clinically diagnosed AD dementia versus CN	seq.23696.256	23696-256	Protein	tRNA (adenine(58)-N(1))-methyltransferase non-catalytic subunit TRM6	TRM6	Q9UJA5	51605	TRMT6	-0.227453	0.0365	0.216
Clinically diagnosed AD dementia versus CN	seq.14124.6	14124-6	Protein	Ephrin-A2	Ephrin-A2	O43921	1943	EFNA2	-0.224049	0.0366	0.217
Clinically diagnosed AD dementia versus CN	seq.6473.55	6473-55	Protein	BPI fold-containing family A member 1	PLUNC	Q9NP55	51297	BPIFA1	0.21916	0.0367	0.217
Clinically diagnosed AD dementia versus CN	seq.23569.53	23569-53	Protein	START domain-containing protein 10	STA10	Q9Y365	10809	STARD10	0.209669	0.0367	0.217
Clinically diagnosed AD dementia versus CN	seq.24424.25	24424-25	Protein	TBC1 domain family member 25	TBC25	Q3MII6	4943	TBC1D25	-0.273489	0.0368	0.218
Clinically diagnosed AD dementia versus CN	seq.25963.2	25963-2	Protein	Exportin-5	XPO5	Q9HAV4	57510	XPO5	-0.188423	0.0369	0.218
Clinically diagnosed AD dementia versus CN	seq.9744.139	9744-139	Protein	DnaJ homolog subfamily A member 4	DNJA4	Q8WW22	55466	DNAJA4	-0.338315	0.0371	0.219
Clinically diagnosed AD dementia versus CN	seq.12834.3	12834-3	Protein	Potassium voltage-gated channel subfamily F member 1	KCNF1	Q9H3M0	3754	KCNF1	0.205489	0.0372	0.219
Clinically diagnosed AD dementia versus CN	seq.19134.66	19134-66	Protein	DNA-directed RNA polymerases I, II, and III subunit RPABC4	RPAB4	P53803	5440	POLR2K	-0.40873	0.0372	0.219
Clinically diagnosed AD dementia versus CN	seq.14687.6	14687-6	Protein	Perilipin-3	M6PBP	O60664	10226	PLIN3	-0.249012	0.0374	0.22
Clinically diagnosed AD dementia versus CN	seq.2609.59	2609-59	Protein	Cystatin-C	Cystatin C	P01034	1471	CST3	0.196015	0.0376	0.221
Clinically diagnosed AD dementia versus CN	seq.22771.6	22771-6	Protein	Sterile alpha motif domain-containing protein 12	SAM12	Q8N8I0	401474	SAMD12	-0.233481	0.0378	0.222
Clinically diagnosed AD dementia versus CN	seq.13441.30	13441-30	Protein	Dixin	DIXC1	Q155Q3	85458	DIXDC1	0.198057	0.0378	0.222
Clinically diagnosed AD dementia versus CN	seq.22955.28	22955-28	Protein	Retinol-binding protein 1	CRBP	P09455	5947	RBP1	0.214011	0.0379	0.222
Clinically diagnosed AD dementia versus CN	seq.10507.166	10507-166	Protein	Acrosomal protein SP-10	sperm protein 10	P26436	56	ACRV1	0.165614	0.038	0.223
Clinically diagnosed AD dementia versus CN	seq.7050.5	7050-5	Protein	Neuronal growth regulator 1	NEGR1	Q7Z3B1	257194	NEGR1	0.213509	0.0381	0.223
Clinically diagnosed AD dementia versus CN	seq.21916.82	21916-82	Protein	Ubiquitin thioesterase otulin	OTUL	Q96BN8	90268	OTULIN	0.197395	0.0382	0.223
Clinically diagnosed AD dementia versus CN	seq.13933.276	13933-276	Protein	NGFI-A-binding protein 1	NAB1	Q13506	4664	NAB1	0.183967	0.0382	0.223
Clinically diagnosed AD dementia versus CN	seq.14079.14	14079-14	Protein	Interleukin-18 receptor 1	IL-18 Ra	Q13478	8809	IL18R1	-0.186754	0.0383	0.223
Clinically diagnosed AD dementia versus CN	seq.8484.24	8484-24	Protein	Leptin	Leptin	P41159	3952	LEP	-0.200078	0.0383	0.223
Clinically diagnosed AD dementia versus CN	seq.4414.69	4414-69	Protein	Pulmonary surfactant-associated protein D	SP-D	P35247	6441	SFTPD	0.211062	0.0383	0.223
Clinically diagnosed AD dementia versus CN	seq.25910.1	25910-1	Protein	IgGFc-binding protein	FCGBP	Q9Y6R7	8857	FCGBP	-0.192447	0.0383	0.223
Clinically diagnosed AD dementia versus CN	seq.13975.56	13975-56	Protein	Liprin-alpha-1	LIPA1	Q13136	8500	PPFIA1	0.272109	0.0384	0.223
Clinically diagnosed AD dementia versus CN	seq.5238.26	5238-26	Protein	Peptidyl-prolyl cis-trans isomerase E	PPIE	Q9UNP9	10450	PPIE	0.485252	0.0386	0.225
Clinically diagnosed AD dementia versus CN	seq.11590.5	11590-5	Protein	Probable RNA-binding protein 23	RBM23	Q86U06	55147	RBM23	0.17598	0.0387	0.225
Clinically diagnosed AD dementia versus CN	seq.20958.13	20958-13	Protein	Ras-related protein Rab-23	RAB23	Q9ULC3	51715	RAB23	0.474838	0.0387	0.225
Clinically diagnosed AD dementia versus CN	seq.19227.18	19227-18	Protein	Basic leucine zipper transcriptional factor ATF-like	BATF	Q16520	10538	BATF	0.22764	0.0387	0.225
Clinically diagnosed AD dementia versus CN	seq.23407.9	23407-9	Protein	S-acyl fatty acid synthase thioesterase, medium chain	SAST	Q9NV23	55301	OLAH	-0.278276	0.0388	0.225
Clinically diagnosed AD dementia versus CN	seq.8403.18	8403-18	Protein	Fatty acid synthase	Fatty acid synthase	P49327	2194	FASN	0.37073	0.0388	0.225
Clinically diagnosed AD dementia versus CN	seq.15487.164	15487-164	Protein	Liver carboxylesterase 1	carboxylesterase, liver	P23141	1066	CES1	-0.224993	0.0388	0.225
Clinically diagnosed AD dementia versus CN	seq.21207.1	21207-1	Protein	Bifunctional coenzyme A synthase	COASY	Q13057	80347	COASY	0.225386	0.0391	0.226
Clinically diagnosed AD dementia versus CN	seq.24951.3	24951-3	Protein	Protein VAC14 homolog	VAC14	Q08AM6	55697	VAC14	-0.245829	0.0392	0.227
Clinically diagnosed AD dementia versus CN	seq.11212.7	11212-7	Protein	Thioredoxin domain-containing protein 5	TXND5	Q8NBS9	81567	TXNDC5	0.225675	0.0393	0.227
Clinically diagnosed AD dementia versus CN	seq.2813.11	2813-11	Protein	Agouti-related protein	ART	O00253	181	AGRP	0.201809	0.0393	0.227
Clinically diagnosed AD dementia versus CN	seq.18882.7	18882-7	Protein	Calsyntenin-2	CSTN2	Q9H4D0	64084	CLSTN2	0.186205	0.0394	0.227
Clinically diagnosed AD dementia versus CN	seq.23528.199	23528-199	Protein	Phytanoyl-CoA hydroxylase-interacting protein-like	PHIPL	Q96FC7	84457	PHYHIPL	0.193973	0.0394	0.227
Clinically diagnosed AD dementia versus CN	seq.4594.22	4594-22	Protein	Pituitary adenylate cyclase-activating polypeptide 38	PACAP-38	P18509	116	ADCYAP1	0.187298	0.0394	0.227
Clinically diagnosed AD dementia versus CN	seq.25110.19	25110-19	Protein	Exocyst complex component 7	EXOC7	Q9UPT5	23265	EXOC7	-0.292217	0.0396	0.228
Clinically diagnosed AD dementia versus CN	seq.9603.9	9603-9	Protein	Interleukin-22 receptor subunit alpha-1	IL22RA1	Q8N6P7	58985	IL22RA1	-0.243636	0.0396	0.228
Clinically diagnosed AD dementia versus CN	seq.6955.68	6955-68	Protein	Sorting nexin-1	SNX1	Q13596	6642	SNX1	0.252389	0.0399	0.229
Clinically diagnosed AD dementia versus CN	seq.13374.4	13374-4	Protein	Beta-defensin 113	DB113	Q30KQ7	245927	DEFB113	0.186561	0.04	0.229
Clinically diagnosed AD dementia versus CN	seq.24720.10	24720-10	Protein	Ankyrin repeat domain-containing protein 16	ANR16	Q6P6B7	54522	ANKRD16	0.344625	0.0401	0.229
Clinically diagnosed AD dementia versus CN	seq.5963.9	5963-9	Protein	Dermokine	Dermokine	Q6E0U4	93099	DMKN	0.28202	0.0401	0.229
Clinically diagnosed AD dementia versus CN	seq.5245.40	5245-40	Protein	AMP Kinase (alpha2beta2gamma1)	AMPK a2b2g1	P54646|O43741|P54619	5563|5565|5571	PRKAA2|PRKAB2|PRKAG1	-0.593339	0.0401	0.229
Clinically diagnosed AD dementia versus CN	seq.13653.335	13653-335	Protein	O-acetyl-ADP-ribose deacetylase MACROD1	MACD1	Q9BQ69	28992	MACROD1	-0.211748	0.0403	0.231
Clinically diagnosed AD dementia versus CN	seq.8760.10	8760-10	Protein	DCN1-like protein 5	DCNL5	Q9BTE7	84259	DCUN1D5	-0.215532	0.0406	0.232
Clinically diagnosed AD dementia versus CN	seq.4144.13	4144-13	Protein	C-C motif chemokine 13	MCP-4	Q99616	6357	CCL13	0.238215	0.0406	0.232
Clinically diagnosed AD dementia versus CN	seq.24470.20	24470-20	Protein	Poly(rC)-binding protein 3	PCBP3	P57721	54039	PCBP3	0.34137	0.0406	0.232
Clinically diagnosed AD dementia versus CN	seq.17706.4	17706-4	Protein	Protein phosphatase 1 regulatory subunit 1A	PPR1A	Q13522	5502	PPP1R1A	-0.232152	0.0407	0.232
Clinically diagnosed AD dementia versus CN	seq.20990.48	20990-48	Protein	Thyrotroph embryonic factor	TEF	Q10587	7008	TEF	0.217346	0.0408	0.233
Clinically diagnosed AD dementia versus CN	seq.4842.62	4842-62	Protein	Glypican-3	Glypican 3	P51654	2719	GPC3	-0.197147	0.0409	0.233
Clinically diagnosed AD dementia versus CN	seq.23691.2	23691-2	Protein	Tubulin--tyrosine ligase-like protein 12	TTL12	Q14166	23170	TTLL12	0.231503	0.0409	0.233
Clinically diagnosed AD dementia versus CN	seq.12543.76	12543-76	Protein	Zinc finger protein 560	ZN560	Q96MR9	147741	ZNF560	0.193329	0.041	0.233
Clinically diagnosed AD dementia versus CN	seq.9880.33	9880-33	Protein	Tryptophan 2,3-dioxygenase	T23O	P48775	6999	TDO2	-0.186727	0.041	0.233
Clinically diagnosed AD dementia versus CN	seq.12940.35	12940-35	Protein	Aldehyde dehydrogenase family 3 member B1	AL3B1	P43353	221	ALDH3B1	0.178746	0.041	0.233
Clinically diagnosed AD dementia versus CN	seq.20937.43	20937-43	Protein	Ribosomal RNA small subunit methyltransferase NEP1	NEP1	Q92979	10436	EMG1	0.206086	0.0411	0.233
Clinically diagnosed AD dementia versus CN	seq.10010.10	10010-10	Protein	Beclin-1	BECN1	Q14457	8678	BECN1	0.21742	0.0411	0.233
Clinically diagnosed AD dementia versus CN	seq.8843.34	8843-34	Protein	Myelin regulatory factor	MRF	Q9Y2G1	745	MYRF	0.224798	0.0411	0.233
Clinically diagnosed AD dementia versus CN	seq.6627.25	6627-25	Protein	Inactive pancreatic lipase-related protein 1	LIPR1	P54315	5407	PNLIPRP1	0.182703	0.0412	0.233
Clinically diagnosed AD dementia versus CN	seq.18311.44	18311-44	Protein	Dynactin subunit 6	DCTN6	O00399	10671	DCTN6	-0.305838	0.0412	0.233
Clinically diagnosed AD dementia versus CN	seq.23579.3	23579-3	Protein	Kita-kyushu lung cancer antigen 1	KKLC1	Q5H943	203413	CT83	0.18301	0.0413	0.233
Clinically diagnosed AD dementia versus CN	seq.17155.1	17155-1	Protein	Vacuolar protein sorting-associated protein 28 homolog	VPS28 protein homolog	Q9UK41	51160	VPS28	-0.198295	0.0413	0.233
Clinically diagnosed AD dementia versus CN	seq.14028.22	14028-22	Protein	Phosphatidylinositol 4-phosphate 3-kinase C2 domain-containing subunit alpha	P3C2A	O00443	5286	PIK3C2A	-0.215214	0.0414	0.233
Clinically diagnosed AD dementia versus CN	seq.21804.15	21804-15	Protein	Putative KHDC1-like protein	KHDCL	Q5JSQ8	100129128	KHDC1L	-0.285024	0.0414	0.233
Clinically diagnosed AD dementia versus CN	seq.8067.21	8067-21	Protein	Potassium voltage-gated channel subfamily E member 3	KCNE3	Q9Y6H6	10008	KCNE3	-0.235367	0.0414	0.233
Clinically diagnosed AD dementia versus CN	seq.17332.3	17332-3	Protein	Poly(ADP-ribose) glycohydrolase ARH3	ARHL2	Q9NX46	54936	ADPRS	0.343505	0.0416	0.233
Clinically diagnosed AD dementia versus CN	seq.3509.1	3509-1	Protein	C-C motif chemokine 15	MIP-5	Q16663	6359	CCL15	0.183293	0.0416	0.233
Clinically diagnosed AD dementia versus CN	seq.20105.7	20105-7	Protein	Myosin light polypeptide 6	Myosin light polypeptide 6	P60660	4637	MYL6	-0.311085	0.0416	0.233
Clinically diagnosed AD dementia versus CN	seq.5682.13	5682-13	Protein	Vasorin	VASN	Q6EMK4	114990	VASN	-0.184492	0.0416	0.233
Clinically diagnosed AD dementia versus CN	seq.10496.11	10496-11	Protein	Calcium-activated chloride channel regulator 1	CaCC	A8K7I4	1179	CLCA1	0.190756	0.0417	0.234
Clinically diagnosed AD dementia versus CN	seq.21497.32	21497-32	Protein	Hypoxia up-regulated protein 1	HYOU1	Q9Y4L1	10525	HYOU1	0.225471	0.0418	0.234
Clinically diagnosed AD dementia versus CN	seq.7247.1	7247-1	Protein	RAB6-interacting golgin	GORAB	Q5T7V8	92344	GORAB	-0.22129	0.0419	0.235
Clinically diagnosed AD dementia versus CN	seq.7203.125	7203-125	Protein	Beta-1,3-N-acetylglucosaminyltransferase radical fringe	RFNG	Q9Y644	5986	RFNG	-0.224726	0.042	0.235
Clinically diagnosed AD dementia versus CN	seq.20926.31	20926-31	Protein	Cyclic AMP-dependent transcription factor ATF-1	ATF1	P18846	466	ATF1	0.227449	0.042	0.235
Clinically diagnosed AD dementia versus CN	seq.23643.22	23643-22	Protein	Peroxisomal multifunctional enzyme type 2	DHB4	P51659	3295	HSD17B4	-0.54509	0.0421	0.235
Clinically diagnosed AD dementia versus CN	seq.12980.31	12980-31	Protein	Pre-mRNA-splicing factor RBM22	RBM22	Q9NW64	55696	RBM22	-0.238464	0.0421	0.235
Clinically diagnosed AD dementia versus CN	seq.5742.14	5742-14	Protein	Lysophosphatidic acid phosphatase type 6	PPA6	Q9NPH0	51205	ACP6	0.181605	0.0421	0.235
Clinically diagnosed AD dementia versus CN	seq.9187.2	9187-2	Protein	Non-histone chromosomal protein HMG-14	HMGN1	P05114	3150	HMGN1	-0.196681	0.0423	0.236
Clinically diagnosed AD dementia versus CN	seq.12471.47	12471-47	Protein	Double-stranded RNA-binding protein Staufen homolog 1	STAU1	O95793	6780	STAU1	0.229191	0.0424	0.236
Clinically diagnosed AD dementia versus CN	seq.8803.61	8803-61	Protein	Nectin-1, isoform gamma:Cytoplasmic domain	nectin-1 gamma:CD	Q15223	5818	NECTIN1	0.175099	0.0424	0.236
Clinically diagnosed AD dementia versus CN	seq.18926.7	18926-7	Protein	Proteasome subunit alpha type-3	PSA3	P25788	5684	PSMA3	0.207766	0.0425	0.236
Clinically diagnosed AD dementia versus CN	seq.15548.35	15548-35	Protein	D-3-phosphoglycerate dehydrogenase	SERA	O43175	26227	PHGDH	-0.189927	0.0426	0.237
Clinically diagnosed AD dementia versus CN	seq.6536.54	6536-54	Protein	Putative phospholipase B-like 2	LAML2	Q8NHP8	196463	PLBD2	-0.25266	0.0426	0.237
Clinically diagnosed AD dementia versus CN	seq.12018.84	12018-84	Protein	Thiamin pyrophosphokinase 1	TPK1	Q9H3S4	27010	TPK1	0.182944	0.0426	0.237
Clinically diagnosed AD dementia versus CN	seq.17781.191	17781-191	Protein	Microtubule-associated proteins 1A/1B light chain 3A	MLP3A	Q9H492	84557	MAP1LC3A	0.289544	0.0427	0.237
Clinically diagnosed AD dementia versus CN	seq.10800.15	10800-15	Protein	Serpin H1	Collagen-binding protein	P50454	871	SERPINH1	-0.376608	0.0427	0.237
Clinically diagnosed AD dementia versus CN	seq.3401.8	3401-8	Protein	Tyrosine-protein phosphatase non-receptor type 2	TCPTP	P17706	5771	PTPN2	0.164872	0.0429	0.237
Clinically diagnosed AD dementia versus CN	seq.10675.223	10675-223	Protein	Thioredoxin-related transmembrane protein 2	TMX2	Q9Y320	51075	TMX2	-0.25606	0.0429	0.238
Clinically diagnosed AD dementia versus CN	seq.6367.66	6367-66	Protein	fibromodulin	fibromodulin	Q06828	2331	FMOD	-0.199564	0.043	0.238
Clinically diagnosed AD dementia versus CN	seq.6706.18	6706-18	Protein	Alkaline phosphatase, placental-like	PPBN	P10696	251	ALPG	0.177919	0.0431	0.238
Clinically diagnosed AD dementia versus CN	seq.2475.1	2475-1	Protein	Mast/stem cell growth factor receptor Kit	SCF sR	P10721	3815	KIT	-0.225058	0.0431	0.238
Clinically diagnosed AD dementia versus CN	seq.4163.5	4163-5	Protein	Histone H2A.z	Histone H2A.z	P0C0S5	3015	H2AZ1	0.178881	0.0432	0.238
Clinically diagnosed AD dementia versus CN	seq.23649.6	23649-6	Protein	Kelch-like protein 2	KLHL2	O95198	11275	KLHL2	0.190759	0.0433	0.239
Clinically diagnosed AD dementia versus CN	seq.20999.12	20999-12	Protein	60S ribosomal protein L5	RL5	P46777	6125	RPL5	0.236277	0.0434	0.239
Clinically diagnosed AD dementia versus CN	seq.20383.31	20383-31	Protein	Probable RNA-binding protein 18	RBM18	Q96H35	92400	RBM18	0.186128	0.0436	0.24
Clinically diagnosed AD dementia versus CN	seq.16309.30	16309-30	Protein	Dickkopf-like protein 1	Soggy-1	Q9UK85	27120	DKKL1	-0.211267	0.0436	0.24
Clinically diagnosed AD dementia versus CN	seq.5116.62	5116-62	Protein	Roundabout homolog 2	ROBO2	Q9HCK4	6092	ROBO2	-0.212353	0.0438	0.241
Clinically diagnosed AD dementia versus CN	seq.7097.8	7097-8	Protein	Testis-specific chromodomain protein Y 1	CDY1	Q9Y6F8	253175	CDY1	-0.186258	0.044	0.242
Clinically diagnosed AD dementia versus CN	seq.3169.70	3169-70	Protein	Alpha-L-iduronidase	IDUA	P35475	3425	IDUA	0.179324	0.0442	0.243
Clinically diagnosed AD dementia versus CN	seq.9886.28	9886-28	Protein	DNA repair protein XRCC4	XRCC4	Q13426	7518	XRCC4	0.263729	0.0442	0.243
Clinically diagnosed AD dementia versus CN	seq.21452.3	21452-3	Protein	Dynamin-1-like protein	DNM1L	O00429	10059	DNM1L	-0.199589	0.0443	0.243
Clinically diagnosed AD dementia versus CN	seq.20918.28	20918-28	Protein	U1 small nuclear ribonucleoprotein C	RU1C	P09234	6631	SNRPC	0.212953	0.0444	0.243
Clinically diagnosed AD dementia versus CN	seq.12838.28	12838-28	Protein	Dual specificity protein phosphatase 15	DUS15	Q9H1R2	128853	DUSP15	-0.194545	0.0444	0.243
Clinically diagnosed AD dementia versus CN	seq.11180.17	11180-17	Protein	SWI/SNF complex subunit SMARCC1	SMRC1	Q92922	6599	SMARCC1	0.187355	0.0445	0.243
Clinically diagnosed AD dementia versus CN	seq.18817.50	18817-50	Protein	Chromobox protein homolog 1	CBX1	P83916	10951	CBX1	0.189699	0.0445	0.243
Clinically diagnosed AD dementia versus CN	seq.3607.71	3607-71	Protein	Dickkopf-related protein 3	DKK3	Q9UBP4	27122	DKK3	0.208442	0.0445	0.243
Clinically diagnosed AD dementia versus CN	seq.18237.29	18237-29	Protein	Nuclear receptor-interacting protein 3	NRIP3	Q9NQ35	56675	NRIP3	0.204034	0.0446	0.243
Clinically diagnosed AD dementia versus CN	seq.14599.18	14599-18	Protein	Stabilin-1	STAB1	Q9NY15	23166	STAB1	0.20953	0.0447	0.244
Clinically diagnosed AD dementia versus CN	seq.23303.131	23303-131	Protein	Thioredoxin domain-containing protein 9	TXND9	O14530	10190	TXNDC9	-0.251068	0.0449	0.245
Clinically diagnosed AD dementia versus CN	seq.11487.4	11487-4	Protein	Testican-1	Testican-1	Q08629	6695	SPOCK1	0.231744	0.0451	0.245
Clinically diagnosed AD dementia versus CN	seq.2871.73	2871-73	Protein	DNA repair protein RAD51 homolog 1	RAD51	Q06609	5888	RAD51	-0.256662	0.0451	0.245
Clinically diagnosed AD dementia versus CN	seq.24656.6	24656-6	Protein	Sesquipedalian-2	SESQ2	Q6ICB4	150368	PHETA2	0.172647	0.0451	0.245
Clinically diagnosed AD dementia versus CN	seq.19112.2	19112-2	Protein	Transcription elongation factor A protein-like 3	TCAL3	Q969E4	85012	TCEAL3	0.177954	0.0452	0.246
Clinically diagnosed AD dementia versus CN	seq.18170.46	18170-46	Protein	Pyrroline-5-carboxylate reductase 1, mitochondrial	P5CR1	P32322	5831	PYCR1	0.18584	0.0453	0.246
Clinically diagnosed AD dementia versus CN	seq.3875.62	3875-62	Protein	AT-rich interactive domain-containing protein 3A	ARI3A	Q99856	1820	ARID3A	0.219437	0.0455	0.247
Clinically diagnosed AD dementia versus CN	seq.2443.10	2443-10	Protein	Fibroblast growth factor 8 isoform B	FGF-8B	P55075	2253	FGF8	0.204159	0.0455	0.247
Clinically diagnosed AD dementia versus CN	seq.9172.69	9172-69	Protein	Neutrophil collagenase	MMP-8	P22894	4317	MMP8	0.180185	0.0455	0.247
Clinically diagnosed AD dementia versus CN	seq.9278.9	9278-9	Protein	Stromal cell-derived factor 1	SDF-1	P48061	6387	CXCL12	0.185313	0.0457	0.247
Clinically diagnosed AD dementia versus CN	seq.13056.18	13056-18	Protein	Orphan sodium- and chloride-dependent neurotransmitter transporter NTT5	S6A16	Q9GZN6	28968	SLC6A16	0.159622	0.0457	0.247
Clinically diagnosed AD dementia versus CN	seq.15465.79	15465-79	Protein	Protein canopy homolog 4	CNPY4	Q8N129	245812	CNPY4	0.465384	0.0458	0.248
Clinically diagnosed AD dementia versus CN	seq.3520.58	3520-58	Protein	Transforming growth factor beta-3	TGF-b3	P10600	7043	TGFB3	0.177115	0.046	0.248
Clinically diagnosed AD dementia versus CN	seq.21326.28	21326-28	Protein	Tubulin-specific chaperone C	TBCC	Q15814	6903	TBCC	0.259451	0.046	0.248
Clinically diagnosed AD dementia versus CN	seq.20530.2	20530-2	Protein	Semaphorin-6D	SEM6D	Q8NFY4	80031	SEMA6D	-0.194154	0.046	0.248
Clinically diagnosed AD dementia versus CN	seq.21739.7	21739-7	Protein	Bifunctional UDP-N-acetylglucosamine 2-epimerase/N-acetylmannosamine kinase	GLCNE	Q9Y223	10020	GNE	0.266558	0.0461	0.248
Clinically diagnosed AD dementia versus CN	seq.24643.21	24643-21	Protein	Lambda-crystallin homolog	CRYL1	Q9Y2S2	51084	CRYL1	0.353403	0.0461	0.248
Clinically diagnosed AD dementia versus CN	seq.20425.12	20425-12	Protein	Hematopoietically-expressed homeobox protein HHEX	HHEX	Q03014	3087	HHEX	-0.230902	0.0462	0.249
Clinically diagnosed AD dementia versus CN	seq.16919.1	16919-1	Protein	Acyl-CoA-binding protein	ACBP	P07108	1622	DBI	0.339939	0.0464	0.25
Clinically diagnosed AD dementia versus CN	seq.6284.7	6284-7	Protein	ALK and LTK ligand 2	F150B	Q6UX46	285016	ALKAL2	0.441621	0.0465	0.25
Clinically diagnosed AD dementia versus CN	seq.8750.46	8750-46	Protein	Vinculin	Vinculin	P18206	7414	VCL	0.184324	0.0466	0.25
Clinically diagnosed AD dementia versus CN	seq.3676.15	3676-15	Protein	Cation-independent mannose-6-phosphate receptor	IGF-II receptor	P11717	3482	IGF2R	0.193055	0.0466	0.25
Clinically diagnosed AD dementia versus CN	seq.21899.36	21899-36	Protein	inhibin A	inhibin A	P05111|P08476	3623|3624	INHA|INHBA	0.173074	0.0466	0.25
Clinically diagnosed AD dementia versus CN	seq.5534.49	5534-49	Protein	Tumor necrosis factor receptor superfamily member 10B:Extracellular domain, TNFR-Cys domains 1-3	TRAIL R2:ECD	O14763	8795	TNFRSF10B	0.180006	0.0467	0.25
Clinically diagnosed AD dementia versus CN	seq.25287.7	25287-7	Protein	Eukaryotic translation initiation factor 4 gamma 1	IF4G1	Q04637	1981	EIF4G1	0.586971	0.0467	0.25
Clinically diagnosed AD dementia versus CN	seq.5687.5	5687-5	Protein	Glucosidase 2 subunit beta	GLU2B	P14314	5589	PRKCSH	0.203968	0.0467	0.25
Clinically diagnosed AD dementia versus CN	seq.15653.9	15653-9	Protein	Collagen alpha-1(X) chain	COAA1	Q03692	1300	COL10A1	0.172116	0.0468	0.25
Clinically diagnosed AD dementia versus CN	seq.10485.56	10485-56	Protein	Melanoma-associated antigen 4	MAGE-4	P43358	4103	MAGEA4	-0.17822	0.0468	0.25
Clinically diagnosed AD dementia versus CN	seq.21232.39	21232-39	Protein	Benign Prostate specific Antigen	BPSA	P07288	354	KLK3	0.242753	0.0469	0.25
Clinically diagnosed AD dementia versus CN	seq.3605.77	3605-77	Protein	Mannan-binding lectin serine protease 1:Mannan-binding lectin serine protease 1 light chain	MASP3:Light	P48740	5648	MASP1	0.169236	0.047	0.251
Clinically diagnosed AD dementia versus CN	seq.10945.11	10945-11	Protein	Syntaxin-6	Syntaxin-6	O43752	10228	STX6	-0.236948	0.0471	0.251
Clinically diagnosed AD dementia versus CN	seq.21008.113	21008-113	Protein	Protein mago nashi homolog	MGN	P61326	4116	MAGOH	0.213829	0.0471	0.251
Clinically diagnosed AD dementia versus CN	seq.19142.39	19142-39	Protein	DNA (cytosine-5)-methyltransferase 3-like	DNM3L	Q9UJW3	29947	DNMT3L	-0.228231	0.0472	0.251
Clinically diagnosed AD dementia versus CN	seq.12385.4	12385-4	Protein	Calpain-3	CAN3	P20807	825	CAPN3	0.197243	0.0472	0.251
Clinically diagnosed AD dementia versus CN	seq.5099.14	5099-14	Protein	Lymphocyte activation gene 3 protein	LAG-3	P18627	3902	LAG3	-0.217038	0.0472	0.251
Clinically diagnosed AD dementia versus CN	seq.22510.6	22510-6	Protein	Nuclear factor erythroid 2-related factor 2	NF2L2	Q16236	4780	NFE2L2	0.203238	0.0473	0.251
Clinically diagnosed AD dementia versus CN	seq.19176.27	19176-27	Protein	Protein FAM49B	FA49B	Q9NUQ9	51571	CYRIB	0.285384	0.0473	0.251
Clinically diagnosed AD dementia versus CN	seq.23162.36	23162-36	Protein	Mitogen-activated protein kinase kinase kinase 10	M3K10	Q02779	4294	MAP3K10	0.239295	0.0473	0.251
Clinically diagnosed AD dementia versus CN	seq.3052.8	3052-8	Protein	Tumor necrosis factor ligand superfamily member 6, soluble form	Fas ligand, soluble	P48023	356	FASLG	-0.298081	0.0473	0.251
Clinically diagnosed AD dementia versus CN	seq.13529.39	13529-39	Protein	Nucleosome assembly protein 1-like 2	NP1L2	Q9ULW6	4674	NAP1L2	0.203985	0.0474	0.251
Clinically diagnosed AD dementia versus CN	seq.17176.13	17176-13	Protein	PC4 and SFRS1-interacting protein	PSIP1	O75475	11168	PSIP1	0.232725	0.0475	0.251
Clinically diagnosed AD dementia versus CN	seq.2677.1	2677-1	Protein	Epidermal growth factor receptor	ERBB1	P00533	1956	EGFR	-0.209825	0.0477	0.252
Clinically diagnosed AD dementia versus CN	seq.9294.45	9294-45	Protein	Microfibrillar-associated protein 2	MFAP2	P55001	4237	MFAP2	0.194277	0.0477	0.252
Clinically diagnosed AD dementia versus CN	seq.23024.25	23024-25	Protein	GTP-binding protein SAR1a	SAR1A	Q9NR31	56681	SAR1A	-0.237306	0.0477	0.252
Clinically diagnosed AD dementia versus CN	seq.9284.25	9284-25	Protein	Secreted frizzled-related protein 4	SFRP4	Q6FHJ7	6424	SFRP4	-0.20625	0.0479	0.253
Clinically diagnosed AD dementia versus CN	seq.5699.19	5699-19	Protein	Protein FAM189A2	CI061	Q15884	9413	FAM189A2	-0.190663	0.048	0.253
Clinically diagnosed AD dementia versus CN	seq.22050.19	22050-19	Protein	KxDL motif-containing protein 1	KXDL1	Q9BQD3	79036	KXD1	0.222189	0.0481	0.253
Clinically diagnosed AD dementia versus CN	seq.17680.12	17680-12	Protein	Ephrin type-B receptor 1	EPHB1	P54762	2047	EPHB1	0.170177	0.0481	0.253
Clinically diagnosed AD dementia versus CN	seq.19152.4	19152-4	Protein	Protein phosphatase inhibitor 2	IPP2	P41236	5504	PPP1R2	0.356634	0.0482	0.253
Clinically diagnosed AD dementia versus CN	seq.18322.15	18322-15	Protein	Bifunctional arginine demethylase and lysyl-hydroxylase JMJD6	JMJD6	Q6NYC1	23210	JMJD6	0.272773	0.0482	0.253
Clinically diagnosed AD dementia versus CN	seq.24973.11	24973-11	Protein	MICAL-like protein 1	MILK1	Q8N3F8	85377	MICALL1	0.341134	0.0483	0.253
Clinically diagnosed AD dementia versus CN	seq.6480.1	6480-1	Protein	Soluble calcium-activated nucleotidase 1	CANT1	Q8WVQ1	124583	CANT1	-0.191896	0.0485	0.255
Clinically diagnosed AD dementia versus CN	seq.13580.2	13580-2	Protein	UDP-N-acetylhexosamine pyrophosphorylase	Sperm-associated antigen 2	Q16222	6675	UAP1	-0.204619	0.0486	0.255
Clinically diagnosed AD dementia versus CN	seq.8941.4	8941-4	Protein	Neuroligin-3	NLGN3	Q9NZ94	54413	NLGN3	0.19069	0.0486	0.255
Clinically diagnosed AD dementia versus CN	seq.21143.10	21143-10	Protein	Calcyphosin	Calcyphosin	Q13938	828	CAPS	0.180556	0.0486	0.255
Clinically diagnosed AD dementia versus CN	seq.22417.10	22417-10	Protein	E3 ubiquitin-protein ligase CBL-C	CBLC	Q9ULV8	23624	CBLC	-0.209791	0.0487	0.255
Clinically diagnosed AD dementia versus CN	seq.22532.59	22532-59	Protein	PLAC8-like protein 1	PL8L1	A1L4L8	153770	PLAC8L1	-0.200124	0.0488	0.255
Clinically diagnosed AD dementia versus CN	seq.21796.43	21796-43	Protein	Glutathione peroxidase 3	Glutathione peroxidase 3	P22352	2878	GPX3	0.176096	0.049	0.256
Clinically diagnosed AD dementia versus CN	seq.3854.24	3854-24	Protein	Nascent polypeptide-associated complex subunit alpha	NACA	Q13765	4666	NACA	-0.635174	0.049	0.256
Clinically diagnosed AD dementia versus CN	seq.14036.116	14036-116	Protein	Multiple PDZ domain protein	MPDZ	O75970	8777	MPDZ	0.18603	0.0494	0.258
Clinically diagnosed AD dementia versus CN	seq.18899.82	18899-82	Protein	Hepatoma-derived growth factor-related protein 3	HDGR3	Q9Y3E1	50810	HDGFL3	0.171256	0.0495	0.258
Clinically diagnosed AD dementia versus CN	seq.3387.1	3387-1	Protein	Serine/threonine-protein kinase PAK 3	PAK3	O75914	5063	PAK3	-0.238514	0.0496	0.258
Clinically diagnosed AD dementia versus CN	seq.24471.2	24471-2	Protein	SET-binding protein	SETBP	Q9Y6X0	26040	SETBP1	0.161397	0.0497	0.259
Clinically diagnosed AD dementia versus CN	seq.15610.72	15610-72	Protein	Cytosol aminopeptidase	LAP	P28838	51056	LAP3	-0.396886	0.0497	0.259
Clinically diagnosed AD dementia versus CN	seq.10457.3	10457-3	Protein	Interleukin-18 receptor accessory protein	IL-18 Rb	O95256	8807	IL18RAP	-0.206339	0.0498	0.259
Clinically diagnosed AD dementia versus CN	seq.3302.58	3302-58	Protein	Cystatin-F	CYTF	O76096	8530	CST7	0.193625	0.0499	0.259
Clinically diagnosed AD dementia versus CN	seq.14057.68	14057-68	Protein	Tumor necrosis factor ligand superfamily member 15	TNFSF15	O95150	9966	TNFSF15	0.1814	0.0499	0.259
Clinically diagnosed AD dementia versus CN	seq.15622.13	15622-13	Protein	Opioid-binding protein/cell adhesion molecule	OBCAM	Q14982	4978	OPCML	-0.225044	0.0499	0.259
Clinically diagnosed AD dementia versus CN	seq.22363.31	22363-31	Protein	tRNA-specific adenosine deaminase 1	ADAT1	Q9BUB4	23536	ADAT1	-0.21284	0.0501	0.26
Clinically diagnosed AD dementia versus CN	seq.9100.32	9100-32	Protein	Uncharacterized protein C5orf46	CE046	Q6UWT4	389336	C5orf46	0.452301	0.0502	0.26
Clinically diagnosed AD dementia versus CN	seq.14227.21	14227-21	Protein	Myosin light chain 6B	MYL6B	P14649	140465	MYL6B	0.189073	0.0503	0.26
Clinically diagnosed AD dementia versus CN	seq.23404.16	23404-16	Protein	Mitotic spindle assembly checkpoint protein MAD2B	MD2L2	Q9UI95	10459	MAD2L2	-0.248999	0.0504	0.261
Clinically diagnosed AD dementia versus CN	seq.10695.12	10695-12	Protein	Protein WFDC10B	WF10B	Q8IUB3	280664	WFDC10B	0.219483	0.0504	0.261
Clinically diagnosed AD dementia versus CN	seq.25488.6	25488-6	Protein	Pleckstrin homology domain-containing family O member 2	PKHO2	Q8TD55	80301	PLEKHO2	0.325404	0.0504	0.261
Clinically diagnosed AD dementia versus CN	seq.12664.19	12664-19	Protein	Tyrosine-protein phosphatase non-receptor type 13	PTN13	Q12923	5783	PTPN13	0.217143	0.0505	0.261
Clinically diagnosed AD dementia versus CN	seq.18276.34	18276-34	Protein	T-cell leukemia/lymphoma protein 1B	TCL1B	O95988	9623	TCL1B	0.168038	0.0506	0.261
Clinically diagnosed AD dementia versus CN	seq.2833.20	2833-20	Protein	Kallikrein-4	Kallikrein 4	Q9Y5K2	9622	KLK4	0.182635	0.0506	0.261
Clinically diagnosed AD dementia versus CN	seq.20439.14	20439-14	Protein	Proline synthase co-transcribed bacterial homolog protein	PROSC	O94903	11212	PLPBP	-0.59023	0.0507	0.261
Clinically diagnosed AD dementia versus CN	seq.16607.78	16607-78	Protein	Gelsolin	Gelsolin	P06396	2934	GSN	-0.176721	0.0508	0.261
Clinically diagnosed AD dementia versus CN	seq.2575.5	2575-5	Protein	Leptin	Leptin	P41159	3952	LEP	-0.190421	0.0508	0.261
Clinically diagnosed AD dementia versus CN	seq.7970.315	7970-315	Protein	Ecto-ADP-ribosyltransferase 3	NAR3	Q13508	419	ART3	0.192703	0.0508	0.261
Clinically diagnosed AD dementia versus CN	seq.13032.1	13032-1	Protein	Beclin-1	BECN1	Q14457	8678	BECN1	-0.22558	0.051	0.262
Clinically diagnosed AD dementia versus CN	seq.10677.9	10677-9	Protein	NADH dehydrogenase [ubiquinone] 1 beta subcomplex subunit 4	NDUB4	O95168	4710	NDUFB4	-0.219579	0.0511	0.262
Clinically diagnosed AD dementia versus CN	seq.7812.11	7812-11	Protein	Protein S100-A9	calgranulin B	P06702	6280	S100A9	0.197424	0.0511	0.262
Clinically diagnosed AD dementia versus CN	seq.23290.3	23290-3	Protein	Survival motor neuron protein	SMN	Q16637	6606	SMN1	0.222042	0.0511	0.262
Clinically diagnosed AD dementia versus CN	seq.23543.92	23543-92	Protein	Probable tRNA pseudouridine synthase 1	TRUB1	Q8WWH5	142940	TRUB1	0.5255	0.0513	0.262
Clinically diagnosed AD dementia versus CN	seq.5491.12	5491-12	Protein	Testican-2	Testican-2	Q92563	9806	SPOCK2	-0.193463	0.0513	0.262
Clinically diagnosed AD dementia versus CN	seq.25053.1	25053-1	Protein	Cytoplasmic dynein 1 light intermediate chain 2	DC1L2	O43237	1783	DYNC1LI2	0.583431	0.0513	0.262
Clinically diagnosed AD dementia versus CN	seq.10959.125	10959-125	Protein	BET1-like protein	BET1L	Q9NYM9	51272	BET1L	0.165959	0.0515	0.263
Clinically diagnosed AD dementia versus CN	seq.8464.31	8464-31	Protein	R-spondin-4	RSPO4	Q2I0M5	343637	RSPO4	0.203924	0.0516	0.263
Clinically diagnosed AD dementia versus CN	seq.17752.24	17752-24	Protein	Arginase-2, mitochondrial	Arginase	P78540	384	ARG2	0.181524	0.0516	0.263
Clinically diagnosed AD dementia versus CN	seq.23408.1	23408-1	Protein	Sorting nexin 16	Sorting nexin 16	P57768	64089	SNX16	0.237139	0.0517	0.264
Clinically diagnosed AD dementia versus CN	seq.8376.25	8376-25	Protein	Lutropin subunit beta	LSHB	P01229	3972	LHB	0.215489	0.0517	0.264
Clinically diagnosed AD dementia versus CN	seq.20590.13	20590-13	Protein	Neuropeptide Y	NPY	P01303	4852	NPY	0.173911	0.0517	0.264
Clinically diagnosed AD dementia versus CN	seq.4956.2	4956-2	Protein	Epiregulin	EPI	O14944	2069	EREG	0.158727	0.0519	0.264
Clinically diagnosed AD dementia versus CN	seq.6518.85	6518-85	Protein	Appetite-regulating hormone	ghrelin	Q9UBU3	51738	GHRL	0.370582	0.052	0.264
Clinically diagnosed AD dementia versus CN	seq.7980.72	7980-72	Protein	N-acetyllactosaminide beta-1,3-N-acetylglucosaminyltransferase 2	B3GN2	Q9NY97	10678	B3GNT2	-0.203188	0.052	0.264
Clinically diagnosed AD dementia versus CN	seq.13434.172	13434-172	Protein	Alpha-parvin	PARVA	Q9NVD7	55742	PARVA	0.206318	0.0521	0.265
Clinically diagnosed AD dementia versus CN	seq.13942.140	13942-140	Protein	SPRY domain-containing SOCS box protein 1	SPSB1	Q96BD6	80176	SPSB1	0.183495	0.0525	0.267
Clinically diagnosed AD dementia versus CN	seq.14705.1	14705-1	Protein	Vascular endothelial growth factor D	VEGF-D	O43915	2277	VEGFD	0.166551	0.0526	0.267
Clinically diagnosed AD dementia versus CN	seq.21722.21	21722-21	Protein	Polypeptide N-acetylgalactosaminyltransferase 4	GALT4	Q8N4A0	100528030	GALNT4	-0.168748	0.0529	0.268
Clinically diagnosed AD dementia versus CN	seq.25037.4	25037-4	Protein	Aspartyl aminopeptidase	DNPEP	Q9ULA0	23549	DNPEP	-0.220229	0.0529	0.268
Clinically diagnosed AD dementia versus CN	seq.15582.25	15582-25	Protein	Ficolin-1	FCN1	O00602	2219	FCN1	-0.19351	0.053	0.268
Clinically diagnosed AD dementia versus CN	seq.6398.12	6398-12	Protein	Lon protease homolog, mitochondrial	LONM	P36776	9361	LONP1	0.450151	0.0532	0.269
Clinically diagnosed AD dementia versus CN	seq.19587.12	19587-12	Protein	Importin subunit alpha-5	IMA5	P52294	3836	KPNA1	-0.195437	0.0532	0.269
Clinically diagnosed AD dementia versus CN	seq.2888.49	2888-49	Protein	Complement component C7	C7	P10643	730	C7	0.198653	0.0532	0.269
Clinically diagnosed AD dementia versus CN	seq.3874.8	3874-8	Protein	Ubiquitin-conjugating enzyme E2 L3	UB2L3	P68036	7332	UBE2L3	0.291479	0.0534	0.269
Clinically diagnosed AD dementia versus CN	seq.8913.22	8913-22	Protein	Sialic acid-binding Ig-like lectin 11:Cytoplasmic domain, Isoform 2	SIG11:CD	Q96RL6	114132	SIGLEC11	0.175562	0.0535	0.269
Clinically diagnosed AD dementia versus CN	seq.6506.54	6506-54	Protein	Transmembrane emp24 domain-containing protein 10	TMEDA	P49755	10972	TMED10	0.174122	0.0535	0.269
Clinically diagnosed AD dementia versus CN	seq.10967.12	10967-12	Protein	Prolactin	PRL	P01236	5617	PRL	0.172948	0.0535	0.269
Clinically diagnosed AD dementia versus CN	seq.12548.75	12548-75	Protein	Ras-related GTP-binding protein C	RRAGC	Q9HB90	64121	RRAGC	-0.207451	0.0539	0.271
Clinically diagnosed AD dementia versus CN	seq.12707.26	12707-26	Protein	Dihydropyrimidinase-related protein 3	DPYL3	Q14195	1809	DPYSL3	0.355541	0.054	0.272
Clinically diagnosed AD dementia versus CN	seq.10073.22	10073-22	Protein	Tyrosyl-DNA phosphodiesterase 1	TYDP1	Q9NUW8	55775	TDP1	0.220334	0.0542	0.272
Clinically diagnosed AD dementia versus CN	seq.25260.62	25260-62	Protein	Uncharacterized protein C15orf17	CO017	Q5XKK7	57184	FAM219B	0.228578	0.0542	0.272
Clinically diagnosed AD dementia versus CN	seq.16831.7	16831-7	Protein	Docking protein 1	DOK1	Q99704	1796	DOK1	0.570223	0.0544	0.272
Clinically diagnosed AD dementia versus CN	seq.3432.21	3432-21	Protein	Ephrin type-A receptor 3	EPHA3	P29320	2042	EPHA3	-0.209541	0.0544	0.272
Clinically diagnosed AD dementia versus CN	seq.23706.13	23706-13	Protein	tRNA (adenine(58)-N(1))-methyltransferase, mitochondrial	TR61B	Q9BVS5	55006	TRMT61B	-0.19561	0.0544	0.272
Clinically diagnosed AD dementia versus CN	seq.5704.74	5704-74	Protein	Granzyme M	Granzyme M	P51124	3004	GZMM	0.172253	0.0544	0.272
Clinically diagnosed AD dementia versus CN	seq.9316.67	9316-67	Protein	WAP four-disulfide core domain protein 1	WFDC1	Q9HC57	58189	WFDC1	0.17215	0.0544	0.272
Clinically diagnosed AD dementia versus CN	seq.12686.15	12686-15	Protein	3-mercaptopyruvate sulfurtransferase	THTM	P25325	4357	MPST	0.206085	0.0545	0.272
Clinically diagnosed AD dementia versus CN	seq.13397.88	13397-88	Protein	Beta-defensin 4A	HBD-2	O15263	100289462	DEFB4A	0.174135	0.0545	0.272
Clinically diagnosed AD dementia versus CN	seq.7124.18	7124-18	Protein	Interleukin-21	IL-21	Q9HBE4	59067	IL21	-0.27375	0.0545	0.272
Clinically diagnosed AD dementia versus CN	seq.24428.76	24428-76	Protein	Lysophospholipase D GDPD1	GDPD1	Q8N9F7	284161	GDPD1	-0.209276	0.0547	0.273
Clinically diagnosed AD dementia versus CN	seq.15331.47	15331-47	Protein	Histone-binding protein RBBP4	RBBP4	Q09028	5928	RBBP4	0.17851	0.0547	0.273
Clinically diagnosed AD dementia versus CN	seq.3839.60	3839-60	Protein	AH receptor-interacting protein	AIP	O00170	9049	AIP	-0.50869	0.0548	0.273
Clinically diagnosed AD dementia versus CN	seq.12754.14	12754-14	Protein	Cold shock domain-containing protein C2	CSDC2	Q9Y534	27254	CSDC2	-0.213393	0.0548	0.273
Clinically diagnosed AD dementia versus CN	seq.23369.17	23369-17	Protein	Phytanoyl-CoA dioxygenase, peroxisomal	PAHX	O14832	5264	PHYH	0.171841	0.0549	0.273
Clinically diagnosed AD dementia versus CN	seq.12587.65	12587-65	Protein	ADP-ribosylation factor-like protein 2	ARL2	P36404	402	ARL2	-0.178695	0.0549	0.273
Clinically diagnosed AD dementia versus CN	seq.18419.20	18419-20	Protein	Actin-related protein 2/3 complex subunit 5	p16-ARC	O15511	10092	ARPC5	-0.222699	0.055	0.273
Clinically diagnosed AD dementia versus CN	seq.12720.71	12720-71	Protein	Ubiquilin-4	UBQL4	Q9NRR5	56893	UBQLN4	0.689735	0.055	0.273
Clinically diagnosed AD dementia versus CN	seq.9834.62	9834-62	Protein	Alcohol dehydrogenase 1B	ADH1B	P00325	125	ADH1B	-0.222128	0.0551	0.274
Clinically diagnosed AD dementia versus CN	seq.6544.33	6544-33	Protein	Protein kinase C-binding protein NELL1	NELL1	Q92832	4745	NELL1	-0.183423	0.0552	0.274
Clinically diagnosed AD dementia versus CN	seq.11220.53	11220-53	Protein	Uncharacterized protein C10orf105	CJ105	Q8TEF2	414152	C10orf105	0.165671	0.0552	0.274
Clinically diagnosed AD dementia versus CN	seq.9312.8	9312-8	Protein	Zinc-alpha-2-glycoprotein	AZGP1	P25311	563	AZGP1	0.180111	0.0553	0.274
Clinically diagnosed AD dementia versus CN	seq.11830.48	11830-48	Protein	Tyrosine-protein phosphatase non-receptor type 11	SHP-2	Q06124	5781	PTPN11	-0.39723	0.0553	0.274
Clinically diagnosed AD dementia versus CN	seq.12831.21	12831-21	Protein	Calcineurin B homologous protein 3	TESC	Q96BS2	54997	TESC	0.275548	0.0553	0.274
Clinically diagnosed AD dementia versus CN	seq.21480.2	21480-2	Protein	CD82 antigen	CD82 antigen	P27701	3732	CD82	0.172622	0.0554	0.274
Clinically diagnosed AD dementia versus CN	seq.9279.7	9279-7	Protein	Immunoglobulin superfamily member 11:Extracellular domain	IGS11:ECD	Q5DX21	152404	IGSF11	-0.208698	0.0554	0.274
Clinically diagnosed AD dementia versus CN	seq.19365.11	19365-11	Protein	Branched-chain-amino-acid aminotransferase, mitochondrial	BCAT2	O15382	587	BCAT2	-0.491148	0.0555	0.274
Clinically diagnosed AD dementia versus CN	seq.23152.49	23152-49	Protein	BTB/POZ domain-containing adapter for CUL3-mediated RhoA degradation protein 2	BACD2	Q13829	7126	TNFAIP1	0.169601	0.0555	0.274
Clinically diagnosed AD dementia versus CN	seq.4429.51	4429-51	Protein	Carbohydrate sulfotransferase 6	CHST6	Q9GZX3	4166	CHST6	0.159912	0.0556	0.274
Clinically diagnosed AD dementia versus CN	seq.6937.251	6937-251	Protein	Uncharacterized protein C1orf43	CA043	Q9BWL3	25912	C1orf43	-0.179878	0.0557	0.274
Clinically diagnosed AD dementia versus CN	seq.17736.105	17736-105	Protein	Aprataxin	APTX	Q7Z2E3	54840	APTX	-0.230577	0.0559	0.275
Clinically diagnosed AD dementia versus CN	seq.2859.69	2859-69	Protein	Histone deacetylase 8	HDAC8	Q9BY41	55869	HDAC8	0.257063	0.0559	0.275
Clinically diagnosed AD dementia versus CN	seq.14603.51	14603-51	Protein	Uncharacterized protein KIAA0040	KIAA0040	Q15053	9674	KIAA0040	0.22071	0.0561	0.276
Clinically diagnosed AD dementia versus CN	seq.25117.17	25117-17	Protein	PGM5	PGM5	Q15124	5239	PGM5	0.174959	0.0561	0.276
Clinically diagnosed AD dementia versus CN	seq.6574.11	6574-11	Protein	Fas apoptotic inhibitory molecule 3	FAIM3	O60667	9214	FCMR	-0.16374	0.0562	0.276
Clinically diagnosed AD dementia versus CN	seq.10560.1	10560-1	Protein	Integral membrane protein 2C:N-term	ITM2C:N-term	Q9NQX7	81618	ITM2C	0.186566	0.0562	0.276
Clinically diagnosed AD dementia versus CN	seq.18376.19	18376-19	Protein	Myosin light chain 3	Myosin light chain 1	P08590	4634	MYL3	0.181773	0.0563	0.276
Clinically diagnosed AD dementia versus CN	seq.20461.58	20461-58	Protein	Protein FAM50A	FA50A	Q14320	9130	FAM50A	0.204656	0.0565	0.277
Clinically diagnosed AD dementia versus CN	seq.24640.63	24640-63	Protein	Hairy/enhancer-of-split related with YRPW motif protein 1	HEY1	Q9Y5J3	23462	HEY1	0.16025	0.0567	0.277
Clinically diagnosed AD dementia versus CN	seq.7223.60	7223-60	Protein	Protein S100-A13	S100A13	Q99584	6284	S100A13	-0.168102	0.0567	0.278
Clinically diagnosed AD dementia versus CN	seq.6273.58	6273-58	Protein	Prolyl 3-hydroxylase 1	P3H1	Q32P28	64175	P3H1	0.193242	0.0569	0.278
Clinically diagnosed AD dementia versus CN	seq.7204.1	7204-1	Protein	Carcinoembryonic antigen-related cell adhesion molecule 21	CEA21	Q3KPI0	90273	CEACAM21	0.161162	0.057	0.278
Clinically diagnosed AD dementia versus CN	seq.8323.163	8323-163	Protein	Trefoil factor 3	TFF3	Q07654	7033	TFF3	0.166947	0.0571	0.279
Clinically diagnosed AD dementia versus CN	seq.14623.26	14623-26	Protein	Small ubiquitin-related modifier 3	SUMO3	P55854	6612	SUMO3	-0.599401	0.0575	0.281
Clinically diagnosed AD dementia versus CN	seq.20385.21	20385-21	Protein	Ceramide-1-phosphate transfer protein	CPTP	Q5TA50	80772	CPTP	0.308804	0.0576	0.281
Clinically diagnosed AD dementia versus CN	seq.2835.1	2835-1	Protein	X-ray repair cross-complementing protein 6	Ku70	P12956	2547	XRCC6	0.163979	0.0576	0.281
Clinically diagnosed AD dementia versus CN	seq.13067.5	13067-5	Protein	cGMP-dependent protein kinase 1, beta isozyme	KGP1B	Q13976	5592	PRKG1	0.283864	0.0578	0.282
Clinically diagnosed AD dementia versus CN	seq.8428.102	8428-102	Protein	Neurotrimin	NTRI	Q9P121	50863	NTM	-0.200551	0.0578	0.282
Clinically diagnosed AD dementia versus CN	seq.22589.3	22589-3	Protein	Frizzled-2	FZD2	Q14332	2535	FZD2	0.185356	0.0579	0.282
Clinically diagnosed AD dementia versus CN	seq.6356.3	6356-3	Protein	Carboxypeptidase B	Carboxypeptidase B1	P15086	1360	CPB1	0.171693	0.058	0.282
Clinically diagnosed AD dementia versus CN	seq.11690.47	11690-47	Protein	Anaphase-promoting complex subunit 7	APC7	Q9UJX3	51434	ANAPC7	0.189052	0.0581	0.282
Clinically diagnosed AD dementia versus CN	seq.4267.81	4267-81	Protein	Pescadillo homolog	PESC	O00541	23481	PES1	0.189249	0.0582	0.282
Clinically diagnosed AD dementia versus CN	seq.8297.8	8297-8	Protein	DnaJ homolog subfamily C member 10	DJC10	Q8IXB1	54431	DNAJC10	0.328337	0.0582	0.282
Clinically diagnosed AD dementia versus CN	seq.14331.262	14331-262	Protein	Dynein light chain Tctex-type 1	DYLT1	P63172	6993	DYNLT1	0.1691	0.0582	0.282
Clinically diagnosed AD dementia versus CN	seq.9237.54	9237-54	Protein	Lysosomal acid phosphatase	Lysosomal acid phosphatase	P11117	53	ACP2	0.247277	0.0584	0.283
Clinically diagnosed AD dementia versus CN	seq.9850.38	9850-38	Protein	Eukaryotic translation initiation factor 1A, X-chromosomal	IF1AX	P47813	1964	EIF1AX	0.174967	0.0584	0.283
Clinically diagnosed AD dementia versus CN	seq.13947.371	13947-371	Protein	Peroxisomal NADH pyrophosphatase NUDT12	NUD12	Q9BQG2	83594	NUDT12	0.246022	0.0585	0.283
Clinically diagnosed AD dementia versus CN	seq.11608.5	11608-5	Protein	Microtubule-associated proteins 1A/1B light chain 3B	MLP3B	Q9GZQ8	81631	MAP1LC3B	-0.460282	0.0588	0.284
Clinically diagnosed AD dementia versus CN	seq.18189.12	18189-12	Protein	Vacuolar protein-sorting-associated protein 25	VPS25	Q9BRG1	84313	VPS25	0.326796	0.059	0.285
Clinically diagnosed AD dementia versus CN	seq.5103.30	5103-30	Protein	Cell surface glycoprotein CD200 receptor 1:Isoform 4, Extracellular Domain	MO2R1:ECD	Q8TD46	131450	CD200R1	0.172431	0.0592	0.286
Clinically diagnosed AD dementia versus CN	seq.8877.22	8877-22	Protein	Protein eva-1 homolog C:Extracellular domain	F176C:ECD	P58658	59271	EVA1C	0.209045	0.0593	0.286
Clinically diagnosed AD dementia versus CN	seq.24944.12	24944-12	Protein	RalBP1-associated Eps domain-containing protein 2	REPS2	Q8NFH8	9185	REPS2	0.177209	0.0596	0.287
Clinically diagnosed AD dementia versus CN	seq.12583.77	12583-77	Protein	Serine/threonine-protein kinase A-Raf	ARAF	P10398	369	ARAF	0.22188	0.0596	0.287
Clinically diagnosed AD dementia versus CN	seq.23248.1	23248-1	Protein	X antigen family member 2	XAGE2	Q96GT9	9502	XAGE2	-0.208413	0.0597	0.287
Clinically diagnosed AD dementia versus CN	seq.12518.289	12518-289	Protein	Protein polybromo-1	PB1	Q86U86	55193	PBRM1	0.149945	0.0598	0.288
Clinically diagnosed AD dementia versus CN	seq.16854.17	16854-17	Protein	U6 snRNA-associated Sm-like protein LSm4	LSM4	Q9Y4Z0	25804	LSM4	-0.199961	0.0599	0.288
Clinically diagnosed AD dementia versus CN	seq.13739.3	13739-3	Protein	Leucine-rich repeat transmembrane protein FLRT1	FLRT1	Q9NZU1	23769	FLRT1	-0.214201	0.0601	0.289
Clinically diagnosed AD dementia versus CN	seq.21747.114	21747-114	Protein	UBE2N (Ubc13)/Uev1a Complex	UBE2N/UB2V1 Complex	P61088|Q13404	7334|387522	UBE2N|UBE2V1	-0.38116	0.0602	0.289
Clinically diagnosed AD dementia versus CN	seq.18881.7	18881-7	Protein	CD97 antigen	CD97	P48960	976	ADGRE5	-0.198689	0.0604	0.29
Clinically diagnosed AD dementia versus CN	seq.3340.53	3340-53	Protein	Thrombospondin-4	TSP4	P35443	7060	THBS4	-0.182256	0.0606	0.291
Clinically diagnosed AD dementia versus CN	seq.13495.48	13495-48	Protein	Hydroxycarboxylic acid receptor 2	HCAR2	Q8TDS4	338442	HCAR2	-0.220312	0.0609	0.292
Clinically diagnosed AD dementia versus CN	seq.22578.17	22578-17	Protein	Roundabout homolog 2	ROBO2	Q9HCK4	6092	ROBO2	-0.203528	0.061	0.292
Clinically diagnosed AD dementia versus CN	seq.9844.138	9844-138	Protein	Alpha-actinin-2	ACTN2	P35609	88	ACTN2	0.175242	0.0611	0.292
Clinically diagnosed AD dementia versus CN	seq.5653.23	5653-23	Protein	Probable inactive serine protease 37	PRS37	A4D1T9	136242	PRSS37	-0.17418	0.0611	0.292
Clinically diagnosed AD dementia versus CN	seq.15374.15	15374-15	Protein	Gastrokine-1	CA11 protein	Q9NS71	56287	GKN1	-0.18278	0.0612	0.292
Clinically diagnosed AD dementia versus CN	seq.21698.11	21698-11	Protein	Integrin a11b1	Integrin a11b1	Q9UKX5|P05556	22801|3688	ITGA11|ITGB1	-0.1939	0.0612	0.292
Clinically diagnosed AD dementia versus CN	seq.13625.19	13625-19	Protein	Lupus La protein:HTH La-type RNA-binding domain	LA:HTH	P05455	6741	SSB	0.159439	0.0612	0.292
Clinically diagnosed AD dementia versus CN	seq.5223.59	5223-59	Protein	Glucokinase regulatory protein	GCKR	Q14397	2646	GCKR	0.162717	0.0613	0.292
Clinically diagnosed AD dementia versus CN	seq.2857.70	2857-70	Protein	Glucocorticoid receptor	Glucocorticoid receptor	P04150	2908	NR3C1	0.14744	0.0613	0.292
Clinically diagnosed AD dementia versus CN	seq.13507.51	13507-51	Protein	Tumor necrosis factor receptor type 1-associated DEATH domain protein	TRADD	Q15628	8717	TRADD	-0.188792	0.0614	0.292
Clinically diagnosed AD dementia versus CN	seq.13681.173	13681-173	Protein	Casein kinase II subunit alpha'	CSK22	P19784	1459	CSNK2A2	0.20171	0.0614	0.292
Clinically diagnosed AD dementia versus CN	seq.2844.53	2844-53	Protein	Tyrosine-protein kinase receptor Tie-1, soluble	sTie-1	P35590	7075	TIE1	-0.176317	0.0614	0.292
Clinically diagnosed AD dementia versus CN	seq.12501.10	12501-10	Protein	Tubulin-specific chaperone A	TBCA	O75347	6902	TBCA	-0.169002	0.0614	0.292
Clinically diagnosed AD dementia versus CN	seq.12392.30	12392-30	Protein	ADP-ribosylation factor-like protein 1	ARL1	P40616	400	ARL1	0.352051	0.0614	0.292
Clinically diagnosed AD dementia versus CN	seq.11208.15	11208-15	Protein	N-acetylglucosamine-1-phosphodiester alpha-N-acetylglucosaminidase	NAGPA	Q9UK23	51172	NAGPA	-0.18981	0.0615	0.292
Clinically diagnosed AD dementia versus CN	seq.3005.5	3005-5	Protein	Tyrosine-protein phosphatase non-receptor type 1	PTP-1B	P18031	5770	PTPN1	0.322598	0.0616	0.292
Clinically diagnosed AD dementia versus CN	seq.23385.18	23385-18	Protein	Cytosolic arginine sensor for mTORC1 subunit 1	CAST1	Q8WTX7	652968	CASTOR1	-0.19522	0.0617	0.293
Clinically diagnosed AD dementia versus CN	seq.19794.10	19794-10	Protein	Uridine diphosphate glucose pyrophosphatase	NUD14	O95848	256281	NUDT14	0.192015	0.0617	0.293
Clinically diagnosed AD dementia versus CN	seq.20442.12	20442-12	Protein	Calcipressin-3	RCAN3	Q9UKA8	11123	RCAN3	0.175464	0.0619	0.293
Clinically diagnosed AD dementia versus CN	seq.5268.49	5268-49	Protein	Matrix metalloproteinase-16	MMP-16	P51512	4325	MMP16	0.164488	0.0619	0.293
Clinically diagnosed AD dementia versus CN	seq.12504.26	12504-26	Protein	Leiomodin-1	LMOD1	P29536	25802	LMOD1	0.181342	0.062	0.293
Clinically diagnosed AD dementia versus CN	seq.6444.15	6444-15	Protein	Pregnancy-specific beta-1-glycoprotein 3	PSG3	Q16557	5671	PSG3	-0.171895	0.0622	0.294
Clinically diagnosed AD dementia versus CN	seq.19335.2	19335-2	Protein	Hematological and neurological expressed 1 protein	HN1	Q9UK76	51155	JPT1	0.175956	0.0622	0.294
Clinically diagnosed AD dementia versus CN	seq.23349.5	23349-5	Protein	Choline-phosphate cytidylyltransferase A	PCY1A	P49585	5130	PCYT1A	0.160756	0.0622	0.294
Clinically diagnosed AD dementia versus CN	seq.19131.184	19131-184	Protein	Nucleolysin TIAR	TIAR	Q01085	7073	TIAL1	0.239328	0.0623	0.294
Clinically diagnosed AD dementia versus CN	seq.3236.12	3236-12	Protein	Glycogen synthase kinase-3 beta	GSK-3 beta	P49841	2932	GSK3B	0.307987	0.0624	0.294
Clinically diagnosed AD dementia versus CN	seq.17751.68	17751-68	Protein	Beta-crystallin B1	CRBB1	P53674	1414	CRYBB1	0.244811	0.0624	0.294
Clinically diagnosed AD dementia versus CN	seq.2523.31	2523-31	Protein	C-C motif chemokine 5	RANTES	P13501	6352	CCL5	-0.168387	0.0624	0.294
Clinically diagnosed AD dementia versus CN	seq.23363.41	23363-41	Protein	Poly(rC)-binding protein 2	PCBP2	Q15366	5094	PCBP2	-0.354589	0.0625	0.294
Clinically diagnosed AD dementia versus CN	seq.16763.11	16763-11	Protein	Leukocyte cell-derived chemotaxin-2	LECT2	O14960	3950	LECT2	-0.183781	0.0625	0.294
Clinically diagnosed AD dementia versus CN	seq.17792.158	17792-158	Protein	Succinate-semialdehyde dehydrogenase, mitochondrial	SSDH	P51649	7915	ALDH5A1	0.17439	0.0626	0.294
Clinically diagnosed AD dementia versus CN	seq.3477.63	3477-63	Protein	High affinity nerve growth factor receptor	TrkA	P04629	4914	NTRK1	0.156589	0.0628	0.295
Clinically diagnosed AD dementia versus CN	seq.19561.216	19561-216	Protein	Plexin-D1	PLXD1	Q9Y4D7	23129	PLXND1	-0.170825	0.063	0.296
Clinically diagnosed AD dementia versus CN	seq.22992.6	22992-6	Protein	Microtubule-associated protein RP/EB family member 3	MARE3	Q9UPY8	22924	MAPRE3	0.177016	0.0631	0.296
Clinically diagnosed AD dementia versus CN	seq.15372.43	15372-43	Protein	Bromodomain-containing protein 2	BRD2	P25440	6046	BRD2	0.167456	0.0631	0.296
Clinically diagnosed AD dementia versus CN	seq.13726.4	13726-4	Protein	T-lymphocyte activation antigen CD80	B7	P33681	941	CD80	-0.168456	0.0634	0.297
Clinically diagnosed AD dementia versus CN	seq.5468.67	5468-67	Protein	Interleukin-17 receptor C	IL-17 RC	Q8NAC3	84818	IL17RC	0.193657	0.0634	0.297
Clinically diagnosed AD dementia versus CN	seq.8780.2	8780-2	Protein	Protocadherin-10:Cytoplasmic domain	PCD10:CD	Q9P2E7	57575	PCDH10	0.161885	0.0634	0.297
Clinically diagnosed AD dementia versus CN	seq.9340.17	9340-17	Protein	Peptidyl-prolyl cis-trans isomerase FKBP14	FKB14	Q9NWM8	55033	FKBP14	0.289727	0.0634	0.297
Clinically diagnosed AD dementia versus CN	seq.4203.50	4203-50	Protein	Cofilin-1	Cofilin-1	P23528	1072	CFL1	0.333156	0.0636	0.297
Clinically diagnosed AD dementia versus CN	seq.22985.160	22985-160	Protein	Insulin-like growth factor-binding protein 2	IGFBP-2	P18065	3485	IGFBP2	0.177761	0.0636	0.297
Clinically diagnosed AD dementia versus CN	seq.12703.6	12703-6	Protein	Serine/threonine-protein kinase Nek7	NEK7	Q8TDX7	140609	NEK7	-0.375378	0.0636	0.297
Clinically diagnosed AD dementia versus CN	seq.23526.25	23526-25	Protein	Protein KTI12 homolog	KTI12	Q96EK9	112970	KTI12	0.459388	0.0641	0.299
Clinically diagnosed AD dementia versus CN	seq.6077.63	6077-63	Protein	Adenosine deaminase CECR1	CECR1	Q9NZK5	51816	ADA2	0.166684	0.0642	0.299
Clinically diagnosed AD dementia versus CN	seq.22795.17	22795-17	Protein	Transcriptional adapter 2-alpha	TAD2A	O75478	6871	TADA2A	-0.24138	0.0644	0.3
Clinically diagnosed AD dementia versus CN	seq.2652.15	2652-15	Protein	Urokinase plasminogen activator surface receptor	suPAR	Q03405	5329	PLAUR	0.199637	0.0644	0.3
Clinically diagnosed AD dementia versus CN	seq.24904.121	24904-121	Protein	Syntaxin-binding protein 4	STXB4	Q6ZWJ1	252983	STXBP4	-0.27404	0.0646	0.301
Clinically diagnosed AD dementia versus CN	seq.20402.11	20402-11	Protein	Trafficking protein particle complex subunit 2	TPC2A	P0DI81	6399	TRAPPC2	-0.47037	0.0646	0.301
Clinically diagnosed AD dementia versus CN	seq.25901.3	25901-3	Protein	CREB-regulated transcription coactivator 3	CRTC3	Q6UUV7	64784	CRTC3	0.240152	0.0648	0.301
Clinically diagnosed AD dementia versus CN	seq.22569.55	22569-55	Protein	TGF-beta receptor type-1	TGFR-1	P36897	7046	TGFBR1	0.145001	0.0648	0.301
Clinically diagnosed AD dementia versus CN	seq.4831.4	4831-4	Protein	L-Selectin	sL-Selectin	P14151	6402	SELL	-0.164492	0.0648	0.301
Clinically diagnosed AD dementia versus CN	seq.2805.6	2805-6	Protein	Angiotensin-converting enzyme 2	ACE2	Q9BYF1	59272	ACE2	0.173382	0.0648	0.301
Clinically diagnosed AD dementia versus CN	seq.10351.51	10351-51	Protein	Interferon regulatory factor 1	IRF1	P10914	3659	IRF1	-0.182432	0.0649	0.301
Clinically diagnosed AD dementia versus CN	seq.11671.19	11671-19	Protein	Peregrin	BRPF1	P55201	7862	BRPF1	0.184025	0.0649	0.301
Clinically diagnosed AD dementia versus CN	seq.11643.73	11643-73	Protein	E3 ubiquitin-protein ligase DTX3L	DTX3L	Q8TDB6	151636	DTX3L	0.182135	0.0649	0.301
Clinically diagnosed AD dementia versus CN	seq.9213.24	9213-24	Protein	Formimidoyltransferase-cyclodeaminase	FTCD	O95954	10841	FTCD	-0.184456	0.065	0.301
Clinically diagnosed AD dementia versus CN	seq.15483.377	15483-377	Protein	Agrin	Agrin	O00468	375790	AGRN	-0.171961	0.0652	0.301
Clinically diagnosed AD dementia versus CN	seq.24027.32	24027-32	Protein	Interferon epsilon-1	IFNE1	Q86WN2	338376	IFNE	0.176305	0.0653	0.302
Clinically diagnosed AD dementia versus CN	seq.23690.228	23690-228	Protein	RNA-binding protein 41	RBM41	Q96IZ5	55285	RBM41	-0.179121	0.0656	0.303
Clinically diagnosed AD dementia versus CN	seq.22140.6	22140-6	Protein	Protein FAM204A	F204A	Q9H8W3	63877	FAM204A	0.153393	0.0656	0.303
Clinically diagnosed AD dementia versus CN	seq.12463.7	12463-7	Protein	Kelch-like protein 13	KLH13	Q9P2N7	90293	KLHL13	-0.165354	0.0656	0.303
Clinically diagnosed AD dementia versus CN	seq.25114.256	25114-256	Protein	TBC1 domain family member 24	TBC24	Q9ULP9	57465	TBC1D24	-0.177127	0.0656	0.303
Clinically diagnosed AD dementia versus CN	seq.7019.13	7019-13	Protein	Semaphorin-7A	Semaphorin-7A	O75326	8482	SEMA7A	-0.175472	0.0657	0.303
Clinically diagnosed AD dementia versus CN	seq.3356.50	3356-50	Protein	Carbonic anhydrase 7	Carbonic anhydrase VII	P43166	766	CA7	0.198889	0.0657	0.303
Clinically diagnosed AD dementia versus CN	seq.22557.68	22557-68	Protein	39S ribosomal protein L50, mitochondrial	RM50	Q8N5N7	54534	MRPL50	-0.199888	0.066	0.304
Clinically diagnosed AD dementia versus CN	seq.21730.56	21730-56	Protein	Ubiquitin carboxyl-terminal hydrolase 19	UBP19	O94966	10869	USP19	0.168979	0.0662	0.304
Clinically diagnosed AD dementia versus CN	seq.22533.95	22533-95	Protein	Serine/threonine-protein phosphatase 1 regulatory subunit 10	PP1RA	Q96QC0	5514	PPP1R10	0.16117	0.0662	0.304
Clinically diagnosed AD dementia versus CN	seq.25472.12	25472-12	Protein	Brain-enriched guanylate kinase-associated protein	BEGIN	Q9BUH8	57596	BEGAIN	-0.212621	0.0663	0.304
Clinically diagnosed AD dementia versus CN	seq.13690.26	13690-26	Protein	Biglycan	BGN	P21810	633	BGN	-0.181527	0.0663	0.304
Clinically diagnosed AD dementia versus CN	seq.21129.95	21129-95	Protein	MAD2L1-binding protein	MD2BP	Q15013	9587	MAD2L1BP	-0.221608	0.0663	0.304
Clinically diagnosed AD dementia versus CN	seq.17355.56	17355-56	Protein	Synaptotagmin-4	SYT4	Q9H2B2	6860	SYT4	0.257486	0.0663	0.304
Clinically diagnosed AD dementia versus CN	seq.11142.11	11142-11	Protein	Angiopoietin-related protein 1:C-Term, Fibrinogen domian	ANGL1:C-term	O95841	9068	ANGPTL1	0.1725	0.0663	0.304
Clinically diagnosed AD dementia versus CN	seq.14136.234	14136-234	Protein	Complement component C1q receptor	C1QR1	Q9NPY3	22918	CD93	-0.187678	0.0664	0.304
Clinically diagnosed AD dementia versus CN	seq.8280.238	8280-238	Protein	Vitronectin	Vitronectin	P04004	7448	VTN	-0.216957	0.0664	0.304
Clinically diagnosed AD dementia versus CN	seq.13073.14	13073-14	Protein	Acidic leucine-rich nuclear phosphoprotein 32 family member A	AN32A	P39687	8125	ANP32A	-0.188618	0.0665	0.304
Clinically diagnosed AD dementia versus CN	seq.15523.9	15523-9	Protein	Delta-aminolevulinic acid dehydratase	HEM2	P13716	210	ALAD	-0.219213	0.0665	0.304
Clinically diagnosed AD dementia versus CN	seq.9750.7	9750-7	Protein	Protein S100-A4	S100A4	P26447	6275	S100A4	-0.216182	0.0666	0.304
Clinically diagnosed AD dementia versus CN	seq.21636.63	21636-63	Protein	Nuclear cap-binding protein subunit 2	NCBP2	P52298	22916	NCBP2	-0.159921	0.0667	0.304
Clinically diagnosed AD dementia versus CN	seq.7147.35	7147-35	Protein	WAP four-disulfide core domain protein 8	WFDC8	Q8IUA0	90199	WFDC8	0.156829	0.0668	0.305
Clinically diagnosed AD dementia versus CN	seq.11134.30	11134-30	Protein	Peptide chain release factor 1-like, mitochondrial	RF1ML	Q9UGC7	54516	MTRF1L	0.245351	0.0669	0.305
Clinically diagnosed AD dementia versus CN	seq.4383.97	4383-97	Protein	Inhibin beta A chain:Inhibin beta B chain heterodimer	Activin AB	P08476|P09529	3624|3625	INHBA|INHBB	0.175215	0.067	0.305
Clinically diagnosed AD dementia versus CN	seq.24444.10	24444-10	Protein	Tetratricopeptide repeat protein 27	TTC27	Q6P3X3	55622	TTC27	-0.343997	0.0671	0.305
Clinically diagnosed AD dementia versus CN	seq.7083.74	7083-74	Protein	Matrilin-4	MATN4	O95460	8785	MATN4	-0.185025	0.0672	0.305
Clinically diagnosed AD dementia versus CN	seq.8633.18	8633-18	Protein	E3 ubiquitin-protein ligase RNF128:region 2	RN128:region 2	Q8TEB7	79589	RNF128	-0.202679	0.0672	0.305
Clinically diagnosed AD dementia versus CN	seq.13519.112	13519-112	Protein	Rho guanine nucleotide exchange factor 25	ARHGP	Q86VW2	115557	ARHGEF25	0.208138	0.0672	0.305
Clinically diagnosed AD dementia versus CN	seq.8889.5	8889-5	Protein	Cell cycle progression protein 1	CCPG1	Q9ULG6	9236	CCPG1	0.159605	0.0672	0.305
Clinically diagnosed AD dementia versus CN	seq.9256.78	9256-78	Protein	Neuronal pentraxin-1	NPTX1	Q15818	4884	NPTX1	0.167082	0.0674	0.306
Clinically diagnosed AD dementia versus CN	seq.23228.2	23228-2	Protein	Uncharacterized protein C12orf76	CL076	Q8N812	400073	C12orf76	-0.215684	0.0675	0.306
Clinically diagnosed AD dementia versus CN	seq.8328.9	8328-9	Protein	Ethanolamine kinase 1	EKI1	Q9HBU6	55500	ETNK1	0.208007	0.0676	0.306
Clinically diagnosed AD dementia versus CN	seq.16850.5	16850-5	Protein	Regulator of G-protein signaling 5	RGS5	O15539	8490	RGS5	0.185435	0.0676	0.306
Clinically diagnosed AD dementia versus CN	seq.8850.5	8850-5	Protein	Putative inactive group IIC secretory phospholipase A2	PA2GC	Q5R387	391013	PLA2G2C	0.166651	0.0677	0.306
Clinically diagnosed AD dementia versus CN	seq.9125.23	9125-23	Protein	Mannan-binding lectin serine protease 1:Sushi 1 and Sushi 2	MASP3:Sushi 1 and Sushi 2	P48740	5648	MASP1	0.159545	0.0677	0.306
Clinically diagnosed AD dementia versus CN	seq.21979.12	21979-12	Protein	Integrin alpha-6	Integrin a6	P23229	3655	ITGA6	0.187826	0.0678	0.306
Clinically diagnosed AD dementia versus CN	seq.6119.14	6119-14	Protein	MAM domain-containing protein 2	MAMC2	Q7Z304	256691	MAMDC2	0.162635	0.0679	0.307
Clinically diagnosed AD dementia versus CN	seq.25948.18	25948-18	Protein	Serine/threonine-protein kinase N2	PKN2	Q16513	5586	PKN2	-0.164518	0.068	0.307
Clinically diagnosed AD dementia versus CN	seq.8935.22	8935-22	Protein	Multidrug resistance-associated protein 6	MRP6	O95255	368	ABCC6	0.178005	0.0683	0.308
Clinically diagnosed AD dementia versus CN	seq.2773.50	2773-50	Protein	Interleukin-10	IL-10	P22301	3586	IL10	0.156348	0.0684	0.308
Clinically diagnosed AD dementia versus CN	seq.24915.123	24915-123	Protein	Calpain-13	CAN13	Q6MZZ7	92291	CAPN13	-0.166671	0.0684	0.308
Clinically diagnosed AD dementia versus CN	seq.21643.8	21643-8	Protein	40S ribosomal protein S20	RS20	P60866	6224	RPS20	0.216857	0.0685	0.308
Clinically diagnosed AD dementia versus CN	seq.5762.35	5762-35	Protein	Sperm-associated antigen 11B	Sperm-associated antigen 11	Q08648	10407	SPAG11B	-0.271813	0.0686	0.309
Clinically diagnosed AD dementia versus CN	seq.24473.11	24473-11	Protein	Cancer/testis antigen family 45 member A3	CT453	Q8NHU0	441519	CT45A3	-0.245141	0.0686	0.309
Clinically diagnosed AD dementia versus CN	seq.8905.20	8905-20	Protein	Calcium-activated potassium channel subunit beta-3	KCMB3	Q9NPA1	27094	KCNMB3	-0.161715	0.0687	0.309
Clinically diagnosed AD dementia versus CN	seq.19496.1	19496-1	Protein	N-acetylneuraminate lyase	NPL	Q9BXD5	80896	NPL	0.154665	0.0687	0.309
Clinically diagnosed AD dementia versus CN	seq.21366.7	21366-7	Protein	RNA-binding protein Musashi homolog 2	MSI2H	Q96DH6	124540	MSI2	0.582056	0.0688	0.309
Clinically diagnosed AD dementia versus CN	seq.20245.13	20245-13	Protein	Retinoic acid receptor RXR-alpha	Retinoic acid receptor RXR-alpha	P19793	6256	RXRA	0.162288	0.069	0.31
Clinically diagnosed AD dementia versus CN	seq.25211.14	25211-14	Protein	Guanine nucleotide-binding protein G(I)/G(S)/G(O) gamma-12 subunit	GBG12	Q9UBI6	55970	GNG12	0.170382	0.069	0.31
Clinically diagnosed AD dementia versus CN	seq.18280.29	18280-29	Protein	Putative D-tyrosyl-tRNA(Tyr) deacylase 2	DTD2	Q96FN9	112487	DTD2	0.386745	0.0692	0.31
Clinically diagnosed AD dementia versus CN	seq.21355.4	21355-4	Protein	Upstream stimulatory factor 1	USF1	P22415	7391	USF1	-0.202547	0.0692	0.31
Clinically diagnosed AD dementia versus CN	seq.25126.19	25126-19	Protein	E3 ubiquitin-protein ligase HECW2	HECW2	Q9P2P5	57520	HECW2	-0.196258	0.0693	0.31
Clinically diagnosed AD dementia versus CN	seq.13511.29	13511-29	Protein	DNA-binding protein SATB1	SATB1	Q01826	6304	SATB1	0.15574	0.0694	0.31
Clinically diagnosed AD dementia versus CN	seq.21310.37	21310-37	Protein	mRNA turnover protein 4 homolog	MRT4	Q9UKD2	51154	MRTO4	0.171572	0.0694	0.31
Clinically diagnosed AD dementia versus CN	seq.19207.119	19207-119	Protein	Adenosine kinase	ADK	P55263	132	ADK	0.209247	0.0695	0.31
Clinically diagnosed AD dementia versus CN	seq.16877.19	16877-19	Protein	Methionine-R-sulfoxide reductase B2, mitochondrial	MSRB2	Q9Y3D2	22921	MSRB2	0.163499	0.0695	0.31
Clinically diagnosed AD dementia versus CN	seq.13229.20	13229-20	Protein	Protein Mdm4	MDM4	O15151	4194	MDM4	0.202628	0.0696	0.311
Clinically diagnosed AD dementia versus CN	seq.8869.5	8869-5	Protein	Butyrophilin subfamily 2 member A1	BT2A1	Q7KYR7	11120	BTN2A1	0.194754	0.0699	0.312
Clinically diagnosed AD dementia versus CN	seq.13629.25	13629-25	Protein	Cysteine protease ATG4B	ATG4B	Q9Y4P1	23192	ATG4B	-0.1671	0.0701	0.312
Clinically diagnosed AD dementia versus CN	seq.24725.4	24725-4	Protein	COP9 signalosome complex subunit 5	CSN5	Q92905	10987	COPS5	-0.383027	0.0701	0.312
Clinically diagnosed AD dementia versus CN	seq.6236.51	6236-51	Protein	Collagen triple helix repeat-containing protein 1	CTHR1	Q96CG8	115908	CTHRC1	-0.211153	0.0702	0.313
Clinically diagnosed AD dementia versus CN	seq.13447.42	13447-42	Protein	Shadow of prion protein	SPRN	Q5BIV9	503542	SPRN	0.261927	0.0703	0.313
Clinically diagnosed AD dementia versus CN	seq.24437.6	24437-6	Protein	YjeF N-terminal domain-containing protein 3	YJEN3	A6XGL0	374887	YJEFN3	0.171274	0.0704	0.313
Clinically diagnosed AD dementia versus CN	seq.20453.9	20453-9	Protein	Non-structural maintenance of chromosomes element 1 homolog	NSE1	Q8WV22	197370	NSMCE1	0.171206	0.0706	0.314
Clinically diagnosed AD dementia versus CN	seq.12442.4	12442-4	Protein	Rho-related GTP-binding protein RhoD	RHOD	O00212	29984	RHOD	0.145823	0.0707	0.314
Clinically diagnosed AD dementia versus CN	seq.6599.5	6599-5	Protein	Protein APCDD1	APCD1	Q8J025	147495	APCDD1	-0.196108	0.0709	0.314
Clinically diagnosed AD dementia versus CN	seq.24499.36	24499-36	Protein	Lengsin	LGSN	Q5TDP6	51557	LGSN	0.244391	0.0709	0.314
Clinically diagnosed AD dementia versus CN	seq.24922.19	24922-19	Protein	NHL repeat-containing protein 2	NHLC2	Q8NBF2	374354	NHLRC2	-0.188376	0.071	0.315
Clinically diagnosed AD dementia versus CN	seq.9594.30	9594-30	Protein	Zinc transporter 5	ZNT5	Q8TAD4	64924	SLC30A5	0.222031	0.0714	0.316
Clinically diagnosed AD dementia versus CN	seq.11462.8	11462-8	Protein	RNA binding protein fox-1 homolog 2	RBM9	O43251	23543	RBFOX2	0.197382	0.0714	0.316
Clinically diagnosed AD dementia versus CN	seq.2617.56	2617-56	Protein	Receptor tyrosine-protein kinase erbB-3	ERBB3	P21860	2065	ERBB3	-0.194191	0.0715	0.316
Clinically diagnosed AD dementia versus CN	seq.11217.16	11217-16	Protein	C-terminal-binding protein 1	CTBP1	Q13363	1487	CTBP1	0.406601	0.0716	0.316
Clinically diagnosed AD dementia versus CN	seq.22009.1	22009-1	Protein	Protein phosphatase 1B	PPM1B	O75688	5495	PPM1B	0.264103	0.0716	0.316
Clinically diagnosed AD dementia versus CN	seq.18307.71	18307-71	Protein	Inorganic pyrophosphatase 2, mitochondrial	PPase 2	Q9H2U2	27068	PPA2	0.237998	0.0716	0.316
Clinically diagnosed AD dementia versus CN	seq.21457.141	21457-141	Protein	Coenzyme Q-binding protein COQ10 homolog A, mitochondrial	CQ10A	Q96MF6	93058	COQ10A	-0.203144	0.0717	0.316
Clinically diagnosed AD dementia versus CN	seq.6907.17	6907-17	Protein	Transmembrane and coiled-coil domain-containing protein 5A	TMC5A	Q8N6Q1	145942	TMCO5A	0.153691	0.0718	0.316
Clinically diagnosed AD dementia versus CN	seq.11279.42	11279-42	Protein	Gamma-aminobutyric acid type B receptor subunit 1	GABR1	Q9UBS5	2550	GABBR1	0.147081	0.0719	0.316
Clinically diagnosed AD dementia versus CN	seq.7038.45	7038-45	Protein	CMP-N-acetylneuraminate-poly-alpha-2,8-sialyltransferase	SIA8D	Q92187	7903	ST8SIA4	0.154781	0.0719	0.316
Clinically diagnosed AD dementia versus CN	seq.8346.9	8346-9	Protein	Dipeptidyl peptidase 2	DPP2	Q9UHL4	29952	DPP7	0.255895	0.0719	0.316
Clinically diagnosed AD dementia versus CN	seq.12345.4	12345-4	Protein	Anaphase-promoting complex subunit 10	APC10	Q9UM13	10393	ANAPC10	0.165925	0.0719	0.316
Clinically diagnosed AD dementia versus CN	seq.16875.13	16875-13	Protein	Protein mago nashi homolog 2	MGN2	Q96A72	55110	MAGOHB	-0.228515	0.072	0.316
Clinically diagnosed AD dementia versus CN	seq.13449.25	13449-25	Protein	Splicing factor 3B subunit 4	SF3B4	Q15427	10262	SF3B4	0.182993	0.072	0.316
Clinically diagnosed AD dementia versus CN	seq.3498.53	3498-53	Protein	Interleukin-17A	IL-17	Q16552	3605	IL17A	0.184341	0.0721	0.317
Clinically diagnosed AD dementia versus CN	seq.11649.3	11649-3	Protein	Stromal membrane-associated protein 1	SMAP1	Q8IYB5	60682	SMAP1	-0.528652	0.0722	0.317
Clinically diagnosed AD dementia versus CN	seq.5679.16	5679-16	Protein	Beta-defensin 103	HBD-3	P81534	414325	DEFB103A	0.148194	0.0722	0.317
Clinically diagnosed AD dementia versus CN	seq.2970.60	2970-60	Protein	Amphiregulin	AREG	P15514	374	AREG	0.315567	0.0724	0.317
Clinically diagnosed AD dementia versus CN	seq.16845.15	16845-15	Protein	Myelin protein zero-like protein 1	MPZL1	O95297	9019	MPZL1	0.192809	0.0724	0.317
Clinically diagnosed AD dementia versus CN	seq.3538.26	3538-26	Protein	Aromatic-L-amino-acid decarboxylase	dopa decarboxylase	P20711	1644	DDC	0.194599	0.0724	0.317
Clinically diagnosed AD dementia versus CN	seq.18900.37	18900-37	Protein	GTPase HRas	H-ras (WT)	P01112	3265	HRAS	-0.269364	0.0724	0.317
Clinically diagnosed AD dementia versus CN	seq.14587.16	14587-16	Protein	Growth/differentiation factor 11	GDF-11	O95390	10220	GDF11	-0.216377	0.0724	0.317
Clinically diagnosed AD dementia versus CN	seq.25491.54	25491-54	Protein	Endoplasmic reticulum junction formation protein lunapark	LNP	Q9C0E8	80856	LNPK	0.280452	0.0725	0.317
Clinically diagnosed AD dementia versus CN	seq.25902.27	25902-27	Protein	Glutamate dehydrogenase 1, mitochondrial	DHE3	P00367	2746	GLUD1	-0.195685	0.0726	0.317
Clinically diagnosed AD dementia versus CN	seq.5915.58	5915-58	Protein	Peroxisomal targeting signal 1 receptor	PEX5	P50542	5830	PEX5	-0.197201	0.0726	0.317
Clinically diagnosed AD dementia versus CN	seq.17158.17	17158-17	Protein	Ubiquitin-conjugating enzyme E2 G1	UB2G1	P62253	7326	UBE2G1	0.16534	0.0726	0.317
Clinically diagnosed AD dementia versus CN	seq.5410.53	5410-53	Protein	Cadherin-15:Extracellular domain	CAD15:ECD	P55291	1013	CDH15	0.159996	0.0728	0.317
Clinically diagnosed AD dementia versus CN	seq.22383.21	22383-21	Protein	MITF	MITF	O75030	4286	MITF	0.272749	0.0729	0.318
Clinically diagnosed AD dementia versus CN	seq.15412.40	15412-40	Protein	Baculoviral IAP repeat-containing protein 7	KIAP	Q96CA5	79444	BIRC7	0.153956	0.073	0.318
Clinically diagnosed AD dementia versus CN	seq.7178.59	7178-59	Protein	Protein DEPP	DEPP	Q9NTK1	11067	DEPP1	-0.163426	0.0731	0.318
Clinically diagnosed AD dementia versus CN	seq.8671.378	8671-378	Protein	Trafficking protein particle complex subunit 5	TPPC5	Q8IUR0	126003	TRAPPC5	0.148289	0.0731	0.318
Clinically diagnosed AD dementia versus CN	seq.4145.58	4145-58	Protein	Neurotrophin-3	Neurotrophin-3	P20783	4908	NTF3	0.153192	0.0733	0.319
Clinically diagnosed AD dementia versus CN	seq.23361.20	23361-20	Protein	RNA-binding protein 4	RBM4	Q9BWF3	5936	RBM4	0.410365	0.0735	0.319
Clinically diagnosed AD dementia versus CN	seq.17786.5	17786-5	Protein	Geranylgeranyl pyrophosphate synthase	GGPPS	O95749	9453	GGPS1	0.166309	0.0735	0.319
Clinically diagnosed AD dementia versus CN	seq.22993.9	22993-9	Protein	C-C motif chemokine 22	MDC	O00626	6367	CCL22	0.148551	0.0736	0.32
Clinically diagnosed AD dementia versus CN	seq.9251.28	9251-28	Protein	Epididymis-specific alpha-mannosidase	MA2B2	Q9Y2E5	23324	MAN2B2	-0.159561	0.0737	0.32
Clinically diagnosed AD dementia versus CN	seq.9831.12	9831-12	Protein	Ras GTPase-activating protein-binding protein 2	G3BP2	Q9UN86	9908	G3BP2	-0.557516	0.0738	0.32
Clinically diagnosed AD dementia versus CN	seq.8288.27	8288-27	Protein	Beta-2-glycoprotein 1	b2-Glycoprotein I	P02749	350	APOH	-0.152831	0.0738	0.32
Clinically diagnosed AD dementia versus CN	seq.16908.5	16908-5	Protein	Oligodendrocyte-myelin glycoprotein	OMGP	P23515	4974	OMG	-0.165311	0.074	0.32
Clinically diagnosed AD dementia versus CN	seq.23291.18	23291-18	Protein	PTB-containing, cubilin and LRP1-interacting protein	PCLI1	Q7Z2X4	55022	PID1	-0.228351	0.074	0.32
Clinically diagnosed AD dementia versus CN	seq.8024.64	8024-64	Protein	Protein-tyrosine sulfotransferase 2	TPST2	O60704	8459	TPST2	0.170126	0.0741	0.32
Clinically diagnosed AD dementia versus CN	seq.8326.63	8326-63	Protein	Single Ig IL-1-related receptor	SIGIRR	Q6IA17	59307	SIGIRR	0.16789	0.0741	0.32
Clinically diagnosed AD dementia versus CN	seq.3004.67	3004-67	Protein	Programmed cell death 1 ligand 2	PD-L2	Q9BQ51	80380	PDCD1LG2	0.154972	0.0741	0.32
Clinically diagnosed AD dementia versus CN	seq.12493.42	12493-42	Protein	Ubiquitin thioesterase OTUB2	OTUB2	Q96DC9	78990	OTUB2	0.181466	0.0744	0.321
Clinically diagnosed AD dementia versus CN	seq.21244.57	21244-57	Protein	Nucleophosmin	NPM1	P06748	4869	NPM1	0.14901	0.0744	0.321
Clinically diagnosed AD dementia versus CN	seq.12718.43	12718-43	Protein	Peptidyl-prolyl cis-trans isomerase NIMA-interacting 4	PIN4	Q9Y237	5303	PIN4	-0.540356	0.0744	0.321
Clinically diagnosed AD dementia versus CN	seq.21338.44	21338-44	Protein	Nucleotide exchange factor SIL1	SIL1	Q9H173	64374	SIL1	0.185591	0.0745	0.321
Clinically diagnosed AD dementia versus CN	seq.22580.29	22580-29	Protein	Ephrin-A2	Ephrin-A2	O43921	1943	EFNA2	0.163495	0.0746	0.321
Clinically diagnosed AD dementia versus CN	seq.6304.8	6304-8	Protein	Complement C1q tumor necrosis factor-related protein 1	C1QT1	Q9BXJ1	114897	C1QTNF1	0.168373	0.0746	0.321
Clinically diagnosed AD dementia versus CN	seq.4355.13	4355-13	Protein	Death-associated protein kinase 2	DAPK2	Q9UIK4	23604	DAPK2	0.188769	0.0747	0.321
Clinically diagnosed AD dementia versus CN	seq.14689.3	14689-3	Protein	Protein SEC13 homolog	SEC13	P55735	6396	SEC13	-0.217597	0.0748	0.321
Clinically diagnosed AD dementia versus CN	seq.15304.1	15304-1	Protein	Regenerating islet-derived protein 3-alpha	PAP1	Q06141	5068	REG3A	0.163701	0.0748	0.322
Clinically diagnosed AD dementia versus CN	seq.15297.3	15297-3	Protein	Protein S100-A3	S100A3	P33764	6274	S100A3	-0.178444	0.0749	0.322
Clinically diagnosed AD dementia versus CN	seq.25116.11	25116-11	Protein	Coiled-coil domain-containing protein 9	CCDC9	Q9Y3X0	26093	CCDC9	0.486652	0.0749	0.322
Clinically diagnosed AD dementia versus CN	seq.13733.5	13733-5	Protein	Interleukin-12 subunit beta	IL-12 p40	P29460	3593	IL12B	-0.164355	0.075	0.322
Clinically diagnosed AD dementia versus CN	seq.2973.15	2973-15	Protein	Platelet glycoprotein 4	CD36 ANTIGEN	P16671	948	CD36	-0.16784	0.075	0.322
Clinically diagnosed AD dementia versus CN	seq.23518.7	23518-7	Protein	Protein FAM151B	F151B	Q6UXP7	167555	FAM151B	0.165516	0.0751	0.322
Clinically diagnosed AD dementia versus CN	seq.20521.83	20521-83	Protein	CD28	CD28	P10747	940	CD28	-0.186489	0.0751	0.322
Clinically diagnosed AD dementia versus CN	seq.8068.43	8068-43	Protein	Uncharacterized family 31 glucosidase KIAA1161:Extracellular domain	K1161:ECD	Q6NSJ0	57462	MYORG	0.173444	0.0752	0.322
Clinically diagnosed AD dementia versus CN	seq.21562.3	21562-3	Protein	Secretoglobin family 1D member 1	SG1D1	O95968	10648	SCGB1D1	-0.227417	0.0752	0.322
Clinically diagnosed AD dementia versus CN	seq.9264.11	9264-11	Protein	Cathepsin O	CATO	P43234	1519	CTSO	-0.181509	0.0754	0.322
Clinically diagnosed AD dementia versus CN	seq.13479.8	13479-8	Protein	Protein FAM171A2	F1712	A8MVW0	284069	FAM171A2	0.176607	0.0755	0.323
Clinically diagnosed AD dementia versus CN	seq.23631.1	23631-1	Protein	N-acetylgalactosamine kinase	GALK2	Q01415	2585	GALK2	-0.196778	0.0756	0.323
Clinically diagnosed AD dementia versus CN	seq.10344.334	10344-334	Protein	Interleukin-10 receptor subunit alpha	IL-10 Ra	Q13651	3587	IL10RA	-0.168705	0.0756	0.323
Clinically diagnosed AD dementia versus CN	seq.9115.78	9115-78	Protein	ADAM DEC1	ADEC1	O15204	27299	ADAMDEC1	0.151896	0.0757	0.323
Clinically diagnosed AD dementia versus CN	seq.23566.6	23566-6	Protein	Apolipoprotein-L2	ApoL-II	Q9BQE5	23780	APOL2	-0.161854	0.0757	0.323
Clinically diagnosed AD dementia versus CN	seq.6472.40	6472-40	Protein	Melanocyte protein PMEL	GP100	P40967	6490	PMEL	-0.177768	0.0758	0.323
Clinically diagnosed AD dementia versus CN	seq.15306.20	15306-20	Protein	Immunoglobulin J chain	IgJ	P01591	3512	JCHAIN	-0.201639	0.0759	0.323
Clinically diagnosed AD dementia versus CN	seq.7096.30	7096-30	Protein	Regulator of microtubule dynamics protein 1	RMD1	Q96DB5	51115	RMDN1	0.347886	0.0759	0.323
Clinically diagnosed AD dementia versus CN	seq.23689.52	23689-52	Protein	Copine-6	CPNE6	O95741	9362	CPNE6	0.170422	0.076	0.323
Clinically diagnosed AD dementia versus CN	seq.2692.74	2692-74	Protein	Phospholipase A2, membrane associated	NPS-PLA2	P14555	5320	PLA2G2A	0.168844	0.0763	0.324
Clinically diagnosed AD dementia versus CN	seq.4693.72	4693-72	Protein	3-hydroxyisobutyrate dehydrogenase, mitochondrial	3HIDH	P31937	11112	HIBADH	-0.168825	0.0765	0.325
Clinically diagnosed AD dementia versus CN	seq.17333.20	17333-20	Protein	Medium-chain specific acyl-CoA dehydrogenase, mitochondrial	ACADM	P11310	34	ACADM	-0.371081	0.0765	0.325
Clinically diagnosed AD dementia versus CN	seq.21437.77	21437-77	Protein	Methylated-DNA--protein-cysteine methyltransferase	MGMT	P16455	4255	MGMT	-0.356625	0.0765	0.325
Clinically diagnosed AD dementia versus CN	seq.2797.56	2797-56	Protein	Apolipoprotein B	Apo B	P04114	338	APOB	-0.165441	0.0766	0.325
Clinically diagnosed AD dementia versus CN	seq.6049.64	6049-64	Protein	Receptor-type tyrosine-protein phosphatase S	PTPRS	Q13332	5802	PTPRS	-0.187904	0.0769	0.326
Clinically diagnosed AD dementia versus CN	seq.13090.17	13090-17	Protein	Protein S100-A6	S100A6	P06703	6277	S100A6	0.180328	0.0771	0.326
Clinically diagnosed AD dementia versus CN	seq.2580.83	2580-83	Protein	Myeloperoxidase	Myeloperoxidase	P05164	4353	MPO	0.163996	0.0771	0.326
Clinically diagnosed AD dementia versus CN	seq.3388.58	3388-58	Protein	Serine/threonine-protein kinase PAK 5	PAK7	Q9P286	57144	PAK5	0.154804	0.0771	0.326
Clinically diagnosed AD dementia versus CN	seq.13544.9	13544-9	Protein	Rho GTPase-activating protein 45	HMHA1	Q92619	23526	ARHGAP45	-0.277899	0.0771	0.326
Clinically diagnosed AD dementia versus CN	seq.9579.59	9579-59	Protein	Transmembrane gamma-carboxyglutamic acid protein 4	TMG4	Q9BZD6	79056	PRRG4	0.149732	0.0773	0.326
Clinically diagnosed AD dementia versus CN	seq.22953.85	22953-85	Protein	CCAAT/enhancer-binding protein beta	CEBPB	P17676	1051	CEBPB	0.186827	0.0775	0.327
Clinically diagnosed AD dementia versus CN	seq.11264.33	11264-33	Protein	Xanthine dehydrogenase/oxidase	XDH	P47989	7498	XDH	-0.170761	0.0776	0.327
Clinically diagnosed AD dementia versus CN	seq.2468.62	2468-62	Protein	C-C motif chemokine 20	MIP-3a	P78556	6364	CCL20	0.171786	0.0776	0.327
Clinically diagnosed AD dementia versus CN	seq.8028.22	8028-22	Protein	Serine protease inhibitor Kazal-type 5	SPINK5	Q9NQ38	11005	SPINK5	0.195711	0.0776	0.327
Clinically diagnosed AD dementia versus CN	seq.5193.51	5193-51	Protein	GTPase KRas	K-ras	P01116	3845	KRAS	0.136474	0.0778	0.328
Clinically diagnosed AD dementia versus CN	seq.9197.4	9197-4	Protein	Galectin-9	LEG9	O00182	3965	LGALS9	-0.198159	0.0778	0.328
Clinically diagnosed AD dementia versus CN	seq.18220.141	18220-141	Protein	Steroid receptor RNA activator 1	SRA1	Q9HD15	10011	SRA1	0.204444	0.078	0.328
Clinically diagnosed AD dementia versus CN	seq.10608.9	10608-9	Protein	Histatin-1	HIS1	P15515	3346	HTN1	-0.168672	0.0781	0.328
Clinically diagnosed AD dementia versus CN	seq.9956.7	9956-7	Protein	Disintegrin and metalloproteinase domain-containing protein 15:Cytoplasmic domain	ADA15:CD	Q13444	8751	ADAM15	0.16214	0.0781	0.328
Clinically diagnosed AD dementia versus CN	seq.17447.52	17447-52	Protein	Secreted frizzled-related protein 4	SFRP4	Q6FHJ7	6424	SFRP4	-0.170835	0.0783	0.329
Clinically diagnosed AD dementia versus CN	seq.7825.7	7825-7	Protein	Monoacylglycerol lipase ABHD12	ABD12	Q8N2K0	26090	ABHD12	0.139787	0.0785	0.329
Clinically diagnosed AD dementia versus CN	seq.19239.5	19239-5	Protein	ADP-ribosylation factor 1	ARF1	P84077	375	ARF1	0.172917	0.0785	0.33
Clinically diagnosed AD dementia versus CN	seq.3422.4	3422-4	Protein	Cyclin-dependent kinase 1:G2/mitotic-specific cyclin-B1 complex	CDK1/cyclin B	P06493|P14635	983|891	CDK1|CCNB1	0.18614	0.0789	0.331
Clinically diagnosed AD dementia versus CN	seq.9490.3	9490-3	Protein	Uncharacterized protein C4orf32	CD032	Q8N8J7	132720	FAM241A	-0.178331	0.079	0.331
Clinically diagnosed AD dementia versus CN	seq.3362.61	3362-61	Protein	Chordin-like protein 1	CRDL1	Q9BU40	91851	CHRDL1	0.183443	0.079	0.331
Clinically diagnosed AD dementia versus CN	seq.9753.17	9753-17	Protein	Ezrin	Ezrin	P15311	7430	EZR	0.406386	0.079	0.331
Clinically diagnosed AD dementia versus CN	seq.18413.24	18413-24	Protein	ADP-ribosylation factor-like protein 4D	ARL4D	P49703	379	ARL4D	-0.18431	0.0794	0.332
Clinically diagnosed AD dementia versus CN	seq.21231.3	21231-3	Protein	Neuronal acetylcholine receptor subunit alpha-5	ACHA5	P30532	1138	CHRNA5	0.139409	0.0795	0.332
Clinically diagnosed AD dementia versus CN	seq.3323.37	3323-37	Protein	Low-density lipoprotein receptor-related protein 8	LRP8	Q14114	7804	LRP8	0.166664	0.0795	0.332
Clinically diagnosed AD dementia versus CN	seq.13567.1	13567-1	Protein	Dihydropyrimidinase-related protein 2	DPYL2	Q16555	1808	DPYSL2	-0.164514	0.0795	0.332
Clinically diagnosed AD dementia versus CN	seq.4237.70	4237-70	Protein	Leucine carboxyl methyltransferase 1	LCMT1	Q9UIC8	51451	LCMT1	0.153343	0.0796	0.332
Clinically diagnosed AD dementia versus CN	seq.3457.57	3457-57	Protein	Periostin	Periostin	Q15063	10631	POSTN	0.162592	0.0796	0.332
Clinically diagnosed AD dementia versus CN	seq.2524.56	2524-56	Protein	High mobility group protein B1	HMG-1	P09429	3146	HMGB1	0.220365	0.0797	0.332
Clinically diagnosed AD dementia versus CN	seq.15470.11	15470-11	Protein	Beta-hexosaminidase subunit beta	Hexosaminidase B	P07686	3074	HEXB	0.157748	0.0798	0.333
Clinically diagnosed AD dementia versus CN	seq.15316.262	15316-262	Protein	Thioredoxin-like protein 4B	TXN4B	Q9NX01	54957	TXNL4B	-0.396834	0.0799	0.333
Clinically diagnosed AD dementia versus CN	seq.22019.21	22019-21	Protein	SH2B adapter protein 3	SH2B3	Q9UQQ2	10019	SH2B3	0.154781	0.0801	0.333
Clinically diagnosed AD dementia versus CN	seq.3506.49	3506-49	Protein	Lymphotoxin alpha2:beta1	Lymphotoxin a2/b1	P01374|Q06643	4049|4050	LTA|LTB	-0.234487	0.0801	0.333
Clinically diagnosed AD dementia versus CN	seq.12517.52	12517-52	Protein	Programmed cell death protein 5	TFAR19	O14737	9141	PDCD5	0.277588	0.0801	0.333
Clinically diagnosed AD dementia versus CN	seq.11633.89	11633-89	Protein	Activator of 90 kDa heat shock protein ATPase homolog 1	AHSA1	O95433	10598	AHSA1	0.34265	0.0801	0.333
Clinically diagnosed AD dementia versus CN	seq.20399.7	20399-7	Protein	Oxidoreductase-like domain-containing protein 1	OXLD1	Q5BKU9	339229	OXLD1	-0.224608	0.0803	0.333
Clinically diagnosed AD dementia versus CN	seq.13730.18	13730-18	Protein	Dipeptidyl peptidase 1	CATC	P53634	1075	CTSC	-0.1522	0.0803	0.333
Clinically diagnosed AD dementia versus CN	seq.12400.25	12400-25	Protein	Ubiquitin-conjugating enzyme E2 T	UBE2T	Q9NPD8	29089	UBE2T	0.151049	0.0804	0.333
Clinically diagnosed AD dementia versus CN	seq.24277.22	24277-22	Protein	Copine-7	CPNE7	Q9UBL6	27132	CPNE7	0.163148	0.0806	0.334
Clinically diagnosed AD dementia versus CN	seq.6408.2	6408-2	Protein	Inhibin beta C chain	INHBC	P55103	3626	INHBC	-0.1862	0.0807	0.334
Clinically diagnosed AD dementia versus CN	seq.7915.31	7915-31	Protein	Amyloid-like protein 2	APLP2	Q06481	334	APLP2	0.153878	0.0809	0.335
Clinically diagnosed AD dementia versus CN	seq.6986.17	6986-17	Protein	Heparan sulfate glucosamine 3-O-sulfotransferase 3B1	HS3SB	Q9Y662	9953	HS3ST3B1	-0.17172	0.0809	0.335
Clinically diagnosed AD dementia versus CN	seq.25218.10	25218-10	Protein	Signal peptidase complex subunit 1	SPCS1	Q9Y6A9	28972	SPCS1	-0.210768	0.081	0.335
Clinically diagnosed AD dementia versus CN	seq.8325.37	8325-37	Protein	Alcohol dehydrogenase 4	ADH4	P08319	127	ADH4	-0.16665	0.0811	0.335
Clinically diagnosed AD dementia versus CN	seq.9333.59	9333-59	Protein	Endoplasmic reticulum resident protein 27	ERP27	Q96DN0	121506	ERP27	0.149342	0.0811	0.335
Clinically diagnosed AD dementia versus CN	seq.11260.47	11260-47	Protein	SUN domain-containing protein 5	SPA4L	Q8TC36	140732	SUN5	0.161414	0.0811	0.335
Clinically diagnosed AD dementia versus CN	seq.20550.38	20550-38	Protein	Neurotrimin	NTRI	Q9P121	50863	NTM	-0.182849	0.0811	0.335
Clinically diagnosed AD dementia versus CN	seq.2944.66	2944-66	Protein	Neuroblastoma suppressor of tumorigenicity 1	DAN	P41271	100532736	NBL1	0.168932	0.0812	0.335
Clinically diagnosed AD dementia versus CN	seq.2693.20	2693-20	Protein	Oncostatin-M	OSM	P13725	5008	OSM	-0.234418	0.0812	0.335
Clinically diagnosed AD dementia versus CN	seq.15468.14	15468-14	Protein	Complement factor H-related protein 1	FHR1	Q03591	3078	CFHR1	-0.153599	0.0814	0.335
Clinically diagnosed AD dementia versus CN	seq.2449.1	2449-1	Protein	Calcium-dependent phospholipase A2	GV	P39877	5322	PLA2G5	0.160524	0.0814	0.335
Clinically diagnosed AD dementia versus CN	seq.8882.1	8882-1	Protein	Disintegrin and metalloproteinase domain-containing protein 17:Cytoplasmic domain	ADAM 17:CD	P78536	6868	ADAM17	0.151995	0.0814	0.335
Clinically diagnosed AD dementia versus CN	seq.12716.3	12716-3	Protein	Zinc finger protein 175	ZN175	Q9Y473	7728	ZNF175	0.192423	0.0815	0.335
Clinically diagnosed AD dementia versus CN	seq.17747.45	17747-45	Protein	TNF receptor-associated factor 1	TRAF1	Q13077	7185	TRAF1	-0.156235	0.0816	0.335
Clinically diagnosed AD dementia versus CN	seq.21761.213	21761-213	Protein	Ubiquitin carboxyl-terminal hydrolase 46	UBP46	P62068	64854	USP46	0.182052	0.0816	0.335
Clinically diagnosed AD dementia versus CN	seq.5643.2	5643-2	Protein	Epididymal-specific lipocalin-8	LCN8	Q6JVE9	138307	LCN8	-0.185462	0.0818	0.336
Clinically diagnosed AD dementia versus CN	seq.24658.98	24658-98	Protein	Coiled-coil domain-containing protein 115	CC115	Q96NT0	84317	CCDC115	0.142688	0.082	0.336
Clinically diagnosed AD dementia versus CN	seq.9002.36	9002-36	Protein	Serpin A11	SPA11	Q86U17	256394	SERPINA11	0.315374	0.082	0.336
Clinically diagnosed AD dementia versus CN	seq.3310.62	3310-62	Protein	Low affinity immunoglobulin gamma Fc region receptor II-b	FCG2B	P31994	2213	FCGR2B	0.149712	0.082	0.336
Clinically diagnosed AD dementia versus CN	seq.22788.10	22788-10	Protein	Sulfotransferase 6B1	ST6B1	Q6IMI4	391365	SULT6B1	-0.213205	0.0821	0.336
Clinically diagnosed AD dementia versus CN	seq.8299.66	8299-66	Protein	Leukocyte immunoglobulin-like receptor subfamily A member 4	LIRA4	P59901	23547	LILRA4	-0.174311	0.0822	0.337
Clinically diagnosed AD dementia versus CN	seq.21220.11	21220-11	Protein	GTP-binding protein SAR1b	SAR1B	Q9Y6B6	51128	SAR1B	-0.169621	0.0823	0.337
Clinically diagnosed AD dementia versus CN	seq.14583.49	14583-49	Protein	Growth/differentiation factor 8	Myostatin	O14793	2660	MSTN	0.16861	0.0823	0.337
Clinically diagnosed AD dementia versus CN	seq.3056.11	3056-11	Protein	NKG2-D type II integral membrane protein	NKG2D	P26718	100528032	KLRK1	0.154013	0.0824	0.337
Clinically diagnosed AD dementia versus CN	seq.6496.60	6496-60	Protein	Protein delta homolog 1:Extracellular domain	DLK1:ECD	P80370	8788	DLK1	-0.166349	0.0824	0.337
Clinically diagnosed AD dementia versus CN	seq.3040.59	3040-59	Protein	C-C motif chemokine 3	MIP-1a	P10147	6348	CCL3	0.156368	0.0826	0.337
Clinically diagnosed AD dementia versus CN	seq.16749.79	16749-79	Protein	Growth/differentiation factor 10	BMP-3b	P55107	2662	GDF10	0.224687	0.0828	0.338
Clinically diagnosed AD dementia versus CN	seq.11544.39	11544-39	Protein	PHD finger protein 3	PHF3	Q92576	23469	PHF3	0.15861	0.083	0.338
Clinically diagnosed AD dementia versus CN	seq.3057.55	3057-55	Protein	WNT1-inducible-signaling pathway protein 1	WISP-1	O95388	8840	CCN4	0.165899	0.0831	0.339
Clinically diagnosed AD dementia versus CN	seq.22862.44	22862-44	Protein	Protein phosphatase 1M	PPM1M	Q96MI6	132160	PPM1M	0.225753	0.0832	0.339
Clinically diagnosed AD dementia versus CN	seq.13588.11	13588-11	Protein	Annexin A9	ANXA9	O76027	8416	ANXA9	0.135764	0.0832	0.339
Clinically diagnosed AD dementia versus CN	seq.9963.19	9963-19	Protein	Protocadherin beta-10	PCDBA	Q9UN67	56126	PCDHB10	0.210578	0.0832	0.339
Clinically diagnosed AD dementia versus CN	seq.9218.7	9218-7	Protein	Tumor necrosis factor receptor superfamily member 6	Fas, soluble	P25445	355	FAS	0.161954	0.0834	0.339
Clinically diagnosed AD dementia versus CN	seq.23285.51	23285-51	Protein	BTB/POZ domain-containing protein KCTD2	KCTD2	Q14681	23510	KCTD2	-0.162304	0.0836	0.339
Clinically diagnosed AD dementia versus CN	seq.4982.54	4982-54	Protein	Elafin	Elafin	P19957	5266	PI3	0.17016	0.0836	0.339
Clinically diagnosed AD dementia versus CN	seq.5489.18	5489-18	Protein	Stress-induced-phosphoprotein 1	Stress-induced-phosphoprotein 1	P31948	10963	STIP1	0.363742	0.0837	0.339
Clinically diagnosed AD dementia versus CN	seq.10534.40	10534-40	Protein	Poly [ADP-ribose] polymerase 1:BRCA1 C-terminal:BRCA1 C-terminus domian	PARP:BRCT domain	P09874	142	PARP1	0.149009	0.0837	0.339
Clinically diagnosed AD dementia versus CN	seq.22514.12	22514-12	Protein	Protein naked cuticle homolog 2	NKD2	Q969F2	85409	NKD2	-0.213118	0.0837	0.339
Clinically diagnosed AD dementia versus CN	seq.21939.6	21939-6	Protein	ULA1/UBA3	ULA1/ UBA3	Q13564|Q8TBC4	8883|9039	NAE1|UBA3	-0.51384	0.0837	0.339
Clinically diagnosed AD dementia versus CN	seq.7861.9	7861-9	Protein	Tyrosine-protein kinase transmembrane receptor ROR2	ROR2	Q01974	4920	ROR2	0.184379	0.0838	0.339
Clinically diagnosed AD dementia versus CN	seq.13022.20	13022-20	Protein	Tumor protein p53-inducible protein 11	P5I11	O14683	9537	TP53I11	-0.156771	0.0838	0.339
Clinically diagnosed AD dementia versus CN	seq.4883.56	4883-56	Protein	Insulin	Insulin	P01308	3630	INS	-0.167379	0.0839	0.339
Clinically diagnosed AD dementia versus CN	seq.13990.1	13990-1	Protein	Pyruvate carboxylase, mitochondrial	pyruvate carboxylase	P11498	5091	PC	0.156344	0.0839	0.339
Clinically diagnosed AD dementia versus CN	seq.21662.121	21662-121	Protein	Dual specificity tyrosine-phosphorylation-regulated kinase 3	DYRK3	O43781	8444	DYRK3	-0.214392	0.0839	0.339
Clinically diagnosed AD dementia versus CN	seq.8071.114	8071-114	Protein	Protocadherin beta-7	PCDB7	Q9Y5E2	56129	PCDHB7	-0.156996	0.0842	0.34
Clinically diagnosed AD dementia versus CN	seq.3046.31	3046-31	Protein	Resistin	resistin	Q9HD89	56729	RETN	-0.164304	0.0843	0.34
Clinically diagnosed AD dementia versus CN	seq.25099.4	25099-4	Protein	Calcium-dependent secretion activator 2	CAPS2	Q86UW7	93664	CADPS2	0.1552	0.0845	0.341
Clinically diagnosed AD dementia versus CN	seq.12581.39	12581-39	Protein	Inositol monophosphatase 2	IMPA2	O14732	3613	IMPA2	-0.211819	0.0846	0.341
Clinically diagnosed AD dementia versus CN	seq.10762.2	10762-2	Protein	Killer cell lectin-like receptor subfamily G member 2:N-term	KLRG2:N-term	A4D1S0	346689	KLRG2	0.157344	0.0848	0.342
Clinically diagnosed AD dementia versus CN	seq.11667.29	11667-29	Protein	Tensin-2	TENC1	Q63HR2	23371	TNS2	0.182641	0.0851	0.343
Clinically diagnosed AD dementia versus CN	seq.2640.3	2640-3	Protein	Macrophage-stimulating protein receptor	MSP R	Q04912	4486	MST1R	0.222944	0.0852	0.343
Clinically diagnosed AD dementia versus CN	seq.10047.12	10047-12	Protein	Neutrophil cytosol factor 2	NCF-2	P19878	4688	NCF2	0.382954	0.0852	0.343
Clinically diagnosed AD dementia versus CN	seq.10672.75	10672-75	Protein	Pulmonary surfactant-associated protein B	SP-B	P07988	6439	SFTPB	-0.15768	0.0854	0.343
Clinically diagnosed AD dementia versus CN	seq.12479.50	12479-50	Protein	cAMP-dependent protein kinase type I-beta regulatory subunit	KAP1	P31321	5575	PRKAR1B	0.172276	0.0854	0.343
Clinically diagnosed AD dementia versus CN	seq.8358.30	8358-30	Protein	Thioredoxin-dependent peroxide reductase, mitochondrial	Peroxiredoxin-3	P30048	10935	PRDX3	-0.582815	0.0856	0.344
Clinically diagnosed AD dementia versus CN	seq.14206.28	14206-28	Protein	Amyloid beta A4 precursor protein-binding family B member 1:Phosphotyrosine Interaction Domain 2	APBB1:PID 2	O00213	322	APBB1	-0.190147	0.0858	0.344
Clinically diagnosed AD dementia versus CN	seq.15558.63	15558-63	Protein	Glutamyl aminopeptidase	AMPE	Q07075	2028	ENPEP	-0.276296	0.0858	0.344
Clinically diagnosed AD dementia versus CN	seq.8520.8	8520-8	Protein	Disintegrin and metalloproteinase domain-containing protein 30	ADA30	Q9UKF2	11085	ADAM30	0.146888	0.0859	0.345
Clinically diagnosed AD dementia versus CN	seq.14229.5	14229-5	Protein	Adenylyltransferase and sulfurtransferase MOCS3	MOCS3	O95396	27304	MOCS3	-0.161526	0.086	0.345
Clinically diagnosed AD dementia versus CN	seq.7951.146	7951-146	Protein	Fc receptor-like protein 2	FCRL2	Q96LA5	79368	FCRL2	-0.151359	0.0861	0.345
Clinically diagnosed AD dementia versus CN	seq.24651.1	24651-1	Protein	Reticulon-1	RTN1	Q16799	6252	RTN1	-0.176925	0.0861	0.345
Clinically diagnosed AD dementia versus CN	seq.5260.80	5260-80	Protein	Non-receptor tyrosine-protein kinase TYK2	TYK2	P29597	7297	TYK2	0.312641	0.0863	0.346
Clinically diagnosed AD dementia versus CN	seq.15333.11	15333-11	Protein	Stromal cell-derived factor 2	SDF2	Q99470	6388	SDF2	0.152578	0.0865	0.346
Clinically diagnosed AD dementia versus CN	seq.3359.11	3359-11	Protein	Cyclin-dependent kinase 8:Cyclin-C complex	CDK8/cyclin C	P49336|P24863	1024|892	CDK8|CCNC	0.232135	0.0865	0.346
Clinically diagnosed AD dementia versus CN	seq.10638.1	10638-1	Protein	TERF1-interacting nuclear factor 2	TINF2	Q9BSI4	26277	TINF2	-0.181846	0.0866	0.346
Clinically diagnosed AD dementia versus CN	seq.12370.30	12370-30	Protein	Apolipoprotein F	Apo F	Q13790	319	APOF	0.158892	0.0869	0.347
Clinically diagnosed AD dementia versus CN	seq.19208.8	19208-8	Protein	Activin receptor type-2A	Activin RIIA	P27037	92	ACVR2A	-0.195489	0.087	0.347
Clinically diagnosed AD dementia versus CN	seq.16304.6	16304-6	Protein	Leucine-rich repeat-containing G-protein coupled receptor 4	LGR4	Q9BXB1	55366	LGR4	0.144951	0.0871	0.347
Clinically diagnosed AD dementia versus CN	seq.10451.11	10451-11	Protein	Nucleobindin-1	NUCB1	Q02818	4924	NUCB1	0.158782	0.0873	0.348
Clinically diagnosed AD dementia versus CN	seq.8839.4	8839-4	Protein	Metaxin-2	Metaxin-2	O75431	10651	MTX2	0.152186	0.0873	0.348
Clinically diagnosed AD dementia versus CN	seq.9089.77	9089-77	Protein	Junctophilin-3	JPH3	Q8WXH2	57338	JPH3	0.136869	0.0875	0.349
Clinically diagnosed AD dementia versus CN	seq.8785.1	8785-1	Protein	Armadillo repeat-containing protein 5:Armadillo Repeat Domain 5	ARMC5:ARM 5	Q96C12	79798	ARMC5	0.148826	0.0876	0.349
Clinically diagnosed AD dementia versus CN	seq.5117.14	5117-14	Protein	Roundabout homolog 3	ROBO3	Q96MS0	64221	ROBO3	0.16101	0.0877	0.349
Clinically diagnosed AD dementia versus CN	seq.18177.49	18177-49	Protein	NEDD8-activating enzyme E1 regulatory subunit	ULA1	Q13564	8883	NAE1	-0.165106	0.0877	0.349
Clinically diagnosed AD dementia versus CN	seq.21547.6	21547-6	Protein	Dentin matrix protein 4	DMP4	Q8IXL6	56975	FAM20C	-0.168175	0.0879	0.349
Clinically diagnosed AD dementia versus CN	seq.18300.39	18300-39	Protein	Transcriptional activator protein Pur-beta	PURB	Q96QR8	5814	PURB	-0.551125	0.0879	0.349
Clinically diagnosed AD dementia versus CN	seq.7787.25	7787-25	Protein	Leukocyte immunoglobulin-like receptor subfamily A member 5	LIRA5	A6NI73	353514	LILRA5	0.155365	0.0879	0.349
Clinically diagnosed AD dementia versus CN	seq.4891.50	4891-50	Protein	Glucagon	Glucagon	P01275	2641	GCG	0.152841	0.088	0.349
Clinically diagnosed AD dementia versus CN	seq.9341.1	9341-1	Protein	Platelet-derived growth factor D	PDGFD	Q9GZP0	80310	PDGFD	0.166129	0.0881	0.349
Clinically diagnosed AD dementia versus CN	seq.22960.8	22960-8	Protein	Low affinity immunoglobulin gamma Fc region receptor II-b	FCG2B	P31994	2213	FCGR2B	0.147608	0.0881	0.349
Clinically diagnosed AD dementia versus CN	seq.21766.50	21766-50	Protein	N-sulphoglucosamine sulphohydrolase	SPHM	P51688	6448	SGSH	0.151584	0.0885	0.35
Clinically diagnosed AD dementia versus CN	seq.5026.66	5026-66	Protein	40S ribosomal protein S3	RS3	P23396	6188	RPS3	0.173258	0.0885	0.35
Clinically diagnosed AD dementia versus CN	seq.9474.22	9474-22	Protein	Asialoglycoprotein receptor 2	ASGR2	P07307	433	ASGR2	0.142077	0.0886	0.351
Clinically diagnosed AD dementia versus CN	seq.11105.171	11105-171	Protein	Alpha-enolase	Alpha enolase	P06733	2023	ENO1	0.288514	0.0887	0.351
Clinically diagnosed AD dementia versus CN	seq.18295.102	18295-102	Protein	Glyoxylate reductase/hydroxypyruvate reductase	GRHPR	Q9UBQ7	9380	GRHPR	-0.232874	0.0887	0.351
Clinically diagnosed AD dementia versus CN	seq.9987.30	9987-30	Protein	Leucine-rich repeat-containing protein 25:Cytoplasmic domain	LRC25:CD	Q8N386	126364	LRRC25	0.138161	0.0889	0.351
Clinically diagnosed AD dementia versus CN	seq.3357.67	3357-67	Protein	Cyclin-dependent kinase 2:Cyclin-A2 complex	CDK2/cyclin A	P24941|P20248	1017|890	CDK2|CCNA2	0.14831	0.089	0.351
Clinically diagnosed AD dementia versus CN	seq.22802.13	22802-13	Protein	Testis-expressed protein 30	TEX30	Q5JUR7	93081	TEX30	-0.244638	0.0891	0.352
Clinically diagnosed AD dementia versus CN	seq.7696.3	7696-3	Protein	Next to BRCA1 gene 1 protein	NBR1	Q14596	4077	NBR1	0.170052	0.0892	0.352
Clinically diagnosed AD dementia versus CN	seq.8828.21	8828-21	Protein	Epithelial splicing regulatory protein 1	ESRP1	Q6NXG1	54845	ESRP1	0.170366	0.0893	0.352
Clinically diagnosed AD dementia versus CN	seq.6039.24	6039-24	Protein	Corticotropin-releasing factor-binding protein	CRHBP	P24387	1393	CRHBP	0.162915	0.0895	0.353
Clinically diagnosed AD dementia versus CN	seq.12508.9	12508-9	Protein	Charged multivesicular body protein 3	CHMP3	Q9Y3E7	100526767	CHMP3	-0.452952	0.0896	0.353
Clinically diagnosed AD dementia versus CN	seq.10876.300	10876-300	Protein	BRCA1-associated ATM activator 1	BRAT1	Q6PJG6	221927	BRAT1	-0.176356	0.0897	0.353
Clinically diagnosed AD dementia versus CN	seq.8388.24	8388-24	Protein	Spastin:Cytoplasmic domain	Spastin:CD	Q9UBP0	6683	SPAST	0.161182	0.0898	0.353
Clinically diagnosed AD dementia versus CN	seq.15472.16	15472-16	Protein	Low-density lipoprotein receptor-related protein 11	LRP11	Q86VZ4	84918	LRP11	0.16104	0.0898	0.353
Clinically diagnosed AD dementia versus CN	seq.23672.10	23672-10	Protein	26S proteasome non-ATPase regulatory subunit 6	PSMD6	Q15008	9861	PSMD6	-0.22957	0.09	0.353
Clinically diagnosed AD dementia versus CN	seq.19121.3	19121-3	Protein	Ubiquilin-2	UBQL2	Q9UHD9	29978	UBQLN2	0.54362	0.0902	0.354
Clinically diagnosed AD dementia versus CN	seq.8016.19	8016-19	Protein	DnaJ homolog subfamily C member 4:N-term	DNJC4:N-term	Q9NNZ3	3338	DNAJC4	0.163555	0.0904	0.355
Clinically diagnosed AD dementia versus CN	seq.8369.102	8369-102	Protein	Dystroglycan	DAG1	Q14118	1605	DAG1	0.175039	0.0905	0.355
Clinically diagnosed AD dementia versus CN	seq.19126.4	19126-4	Protein	Regulation of nuclear pre-mRNA domain-containing protein 1B	C20orf77	Q9NQG5	58490	RPRD1B	0.191109	0.0906	0.355
Clinically diagnosed AD dementia versus CN	seq.7233.73	7233-73	Protein	P2X purinoceptor 6	P2RX6	O15547	9127	P2RX6	0.242917	0.0906	0.355
Clinically diagnosed AD dementia versus CN	seq.17795.176	17795-176	Protein	U6 snRNA-associated Sm-like protein LSm1	LSM1	O15116	27257	LSM1	0.199823	0.0906	0.355
Clinically diagnosed AD dementia versus CN	seq.23413.38	23413-38	Protein	Ankyrin repeat domain-containing protein 45	ANR45	Q5TZF3	339416	ANKRD45	-0.156709	0.0907	0.355
Clinically diagnosed AD dementia versus CN	seq.15585.304	15585-304	Protein	Fibulin-5	fibulin 5	Q9UBX5	10516	FBLN5	0.152526	0.0909	0.355
Clinically diagnosed AD dementia versus CN	seq.2634.2	2634-2	Protein	Cytokine receptor common subunit gamma	IL-2 sRg	P31785	3561	IL2RG	0.434827	0.0909	0.355
Clinically diagnosed AD dementia versus CN	seq.8976.13	8976-13	Protein	Beta-1,4 N-acetylgalactosaminyltransferase 1	B4GN1	Q00973	2583	B4GALNT1	0.160088	0.091	0.355
Clinically diagnosed AD dementia versus CN	seq.23620.16	23620-16	Protein	CapZ-interacting protein	CPZIP	Q6JBY9	92241	RCSD1	0.159456	0.091	0.355
Clinically diagnosed AD dementia versus CN	seq.22504.3	22504-3	Protein	NEDD4-binding protein 2-like 2	N42L2	Q92802	10443	N4BP2L2	0.290642	0.0911	0.355
Clinically diagnosed AD dementia versus CN	seq.8366.19	8366-19	Protein	Uncharacterized protein C1orf115	CA115	Q9H7X2	79762	C1orf115	0.143713	0.0912	0.356
Clinically diagnosed AD dementia versus CN	seq.8654.13	8654-13	Protein	Disintegrin and metalloproteinase domain-containing protein 10:Cytoplasmic domain	ADAM 10:CD	O14672	102	ADAM10	-0.174856	0.0913	0.356
Clinically diagnosed AD dementia versus CN	seq.5909.51	5909-51	Protein	Nucleoside diphosphate kinase A	Nucleoside diphosphate kinase A	P15531	4830	NME1	0.180451	0.0914	0.356
Clinically diagnosed AD dementia versus CN	seq.22534.14	22534-14	Protein	Serine/threonine-protein phosphatase 4 catalytic subunit	PP4C	P60510	5531	PPP4C	-0.181412	0.0916	0.357
Clinically diagnosed AD dementia versus CN	seq.24684.7	24684-7	Protein	GTPase IMAP family member 4	GIMA4	Q9NUV9	55303	GIMAP4	0.14209	0.0917	0.357
Clinically diagnosed AD dementia versus CN	seq.5035.7	5035-7	Protein	Thymidylate synthase	TS	P04818	7298	TYMS	-0.213553	0.0918	0.357
Clinically diagnosed AD dementia versus CN	seq.7210.25	7210-25	Protein	Amyloid-like protein 1	Amyloid-like protein 1	P51693	333	APLP1	-0.153818	0.0918	0.357
Clinically diagnosed AD dementia versus CN	seq.5253.1	5253-1	Protein	Calcium/calmodulin-dependent 3',5'-cyclic nucleotide phosphodiesterase 1A	PDE1A	P54750	5136	PDE1A	0.17293	0.0918	0.357
Clinically diagnosed AD dementia versus CN	seq.23252.4	23252-4	Protein	DnaJ homolog subfamily B member 3	DNJB3	Q8WWF6	414061	DNAJB3	-0.181651	0.0919	0.357
Clinically diagnosed AD dementia versus CN	seq.17757.86	17757-86	Protein	Calcium-binding protein 39	CAB39	Q9Y376	51719	CAB39	-0.731349	0.0919	0.357
Clinically diagnosed AD dementia versus CN	seq.5019.16	5019-16	Protein	Ubiquitin carboxyl-terminal hydrolase isozyme L1	PGP9.5	P09936	7345	UCHL1	0.279378	0.092	0.357
Clinically diagnosed AD dementia versus CN	seq.11275.94	11275-94	Protein	Low-density lipoprotein receptor-related protein 1B	LRP1B	Q9NZR2	53353	LRP1B	0.16484	0.092	0.357
Clinically diagnosed AD dementia versus CN	seq.24201.86	24201-86	Protein	G antigen family C member 1	GAGC1	O60829	9506	PAGE4	0.162039	0.0921	0.357
Clinically diagnosed AD dementia versus CN	seq.14151.4	14151-4	Protein	Ubiquitin-like protein ISG15	UCRP	P05161	9636	ISG15	0.168088	0.0923	0.357
Clinically diagnosed AD dementia versus CN	seq.17755.5	17755-5	Protein	UDP-glucose 6-dehydrogenase	UGDH	O60701	7358	UGDH	0.231853	0.0923	0.357
Clinically diagnosed AD dementia versus CN	seq.3212.30	3212-30	Protein	Neutral ceramidase	ASAH2	Q9NR71	56624	ASAH2	-0.157551	0.0925	0.358
Clinically diagnosed AD dementia versus CN	seq.15542.19	15542-19	Protein	Creatine kinase U-type, mitochondrial	KCRU	P12532	1159	CKMT1A	0.148249	0.0927	0.359
Clinically diagnosed AD dementia versus CN	seq.24222.10	24222-10	Protein	Negative elongation factor A	NELFA	Q9H3P2	7469	NELFA	0.149504	0.0929	0.359
Clinically diagnosed AD dementia versus CN	seq.22091.14	22091-14	Protein	Beta-ureidopropionase	BUP1	Q9UBR1	51733	UPB1	0.160213	0.0929	0.359
Clinically diagnosed AD dementia versus CN	seq.3189.61	3189-61	Protein	Enteropeptidase	Enterokinase	P98073	5651	TMPRSS15	0.146423	0.093	0.359
Clinically diagnosed AD dementia versus CN	seq.14755.4	14755-4	Protein	Lactotransferrin	Lactoferrin	P02788	4057	LTF	0.149186	0.0931	0.359
Clinically diagnosed AD dementia versus CN	seq.22474.28	22474-28	Protein	Homeobox protein Hox-C11	HXC11	O43248	3227	HOXC11	-0.181538	0.0932	0.36
Clinically diagnosed AD dementia versus CN	seq.22526.81	22526-81	Protein	Pyruvate dehydrogenase E1 component beta subunit	PDHB	P11177	5162	PDHB	0.239613	0.0933	0.36
Clinically diagnosed AD dementia versus CN	seq.21759.23	21759-23	Protein	UBP1/WDR48 Complex	UBP1/WDR48 Complex	O94782|Q8TAF3	7398|57599	USP1|WDR48	0.165493	0.0934	0.36
Clinically diagnosed AD dementia versus CN	seq.3858.5	3858-5	Protein	Low molecular weight phosphotyrosine protein phosphatase	PPAC	P24666	52	ACP1	-0.183932	0.0935	0.36
Clinically diagnosed AD dementia versus CN	seq.12859.33	12859-33	Protein	Enoyl-CoA delta isomerase 2, mitochondrial	PECI	O75521	10455	ECI2	0.341279	0.0936	0.36
Clinically diagnosed AD dementia versus CN	seq.6276.16	6276-16	Protein	Furin	Furin	P09958	5045	FURIN	-0.185785	0.0936	0.36
Clinically diagnosed AD dementia versus CN	seq.2616.23	2616-23	Protein	Receptor tyrosine-protein kinase erbB-2	ERBB2	P04626	2064	ERBB2	0.146323	0.0936	0.36
Clinically diagnosed AD dementia versus CN	seq.9728.4	9728-4	Protein	E3 ubiquitin-protein ligase CCNB1IP1	CIP1	Q9NPC3	57820	CCNB1IP1	0.139251	0.0937	0.36
Clinically diagnosed AD dementia versus CN	seq.8834.58	8834-58	Protein	Calnexin	Calnexin	P27824	821	CANX	0.16327	0.0939	0.361
Clinically diagnosed AD dementia versus CN	seq.7903.18	7903-18	Protein	Vesicle-associated membrane protein 3	VAMP3	Q15836	9341	VAMP3	0.140648	0.094	0.361
Clinically diagnosed AD dementia versus CN	seq.14049.17	14049-17	Protein	Interleukin-7	IL-7	P13232	3574	IL7	0.146653	0.094	0.361
Clinically diagnosed AD dementia versus CN	seq.7944.1	7944-1	Protein	Killer cell immunoglobulin-like receptor 3DL3:Extracellular domain	KI3L3:ECD	Q8N743	115653	KIR3DL3	-0.218477	0.094	0.361
Clinically diagnosed AD dementia versus CN	seq.6454.38	6454-38	Protein	Rho GDP-dissociation inhibitor 1	Rho-GDIa	P52565	396	ARHGDIA	0.141736	0.0941	0.361
Clinically diagnosed AD dementia versus CN	seq.6064.4	6064-4	Protein	Endoplasmic reticulum resident protein 44	TXNDC4	Q9BS26	23071	ERP44	0.153508	0.0941	0.361
Clinically diagnosed AD dementia versus CN	seq.15440.57	15440-57	Protein	Neuroendocrine convertase 2	NEC2	P16519	5126	PCSK2	-0.17662	0.0942	0.361
Clinically diagnosed AD dementia versus CN	seq.20996.107	20996-107	Protein	Succinate dehydrogenase assembly factor 1, mitochondrial	SDHF1	A6NFY7	644096	SDHAF1	0.158393	0.0944	0.361
Clinically diagnosed AD dementia versus CN	seq.3479.71	3479-71	Protein	Trypsin-3	TRY3	P35030	5646	PRSS3	0.16334	0.0945	0.362
Clinically diagnosed AD dementia versus CN	seq.15386.7	15386-7	Protein	Fatty acid-binding protein, adipocyte	FABPA	P15090	2167	FABP4	-0.160371	0.0947	0.362
Clinically diagnosed AD dementia versus CN	seq.22055.31	22055-31	Protein	Forkhead box protein O1A	FOXO1A	Q12778	2308	FOXO1	-0.152086	0.0947	0.362
Clinically diagnosed AD dementia versus CN	seq.6373.54	6373-54	Protein	Protein delta homolog 1	DLK1	P80370	8788	DLK1	-0.157832	0.0949	0.362
Clinically diagnosed AD dementia versus CN	seq.21321.2	21321-2	Protein	U2 small nuclear ribonucleoprotein AAE	RU2A	P09661	6627	SNRPA1	0.154373	0.095	0.363
Clinically diagnosed AD dementia versus CN	seq.2734.49	2734-49	Protein	Natural cytotoxicity triggering receptor 2	NKp44	O95944	9436	NCR2	0.166701	0.0955	0.364
Clinically diagnosed AD dementia versus CN	seq.8405.108	8405-108	Protein	Disintegrin and metalloproteinase domain-containing protein 10:Extracellular domain	ADAM 10:ECD	O14672	102	ADAM10	-0.219839	0.0955	0.364
Clinically diagnosed AD dementia versus CN	seq.10480.33	10480-33	Protein	CD59 glycoprotein	CD59	P13987	966	CD59	-0.203162	0.0956	0.364
Clinically diagnosed AD dementia versus CN	seq.17348.5	17348-5	Protein	Synaptojanin-2-binding protein	SYJ2B	P57105	55333	SYNJ2BP	0.140526	0.0957	0.364
Clinically diagnosed AD dementia versus CN	seq.22813.5	22813-5	Protein	TPT1-like protein	TPT1L	Q56UQ5	392490	FLJ44635	-0.160961	0.0958	0.365
Clinically diagnosed AD dementia versus CN	seq.22845.3	22845-3	Protein	28S ribosomal protein S14, mitochondrial	RT14	O60783	63931	MRPS14	0.142267	0.0959	0.365
Clinically diagnosed AD dementia versus CN	seq.9468.8	9468-8	Protein	Vesicular integral-membrane protein VIP36	Lectin, mannose-binding 2	Q12907	10960	LMAN2	0.157231	0.0961	0.365
Clinically diagnosed AD dementia versus CN	seq.2612.5	2612-5	Protein	Eukaryotic translation initiation factor 5	eIF-5	P55010	1983	EIF5	0.232306	0.0962	0.366
Clinically diagnosed AD dementia versus CN	seq.17696.1	17696-1	Protein	TIR domain-containing adapter molecule 2	TIRP	Q86XR7	100302736	TICAM2	-0.189017	0.0963	0.366
Clinically diagnosed AD dementia versus CN	seq.19116.1	19116-1	Protein	Biogenesis of lysosome-related organelles complex 1 subunit 5	MUTED	Q8TDH9	63915	BLOC1S5	0.160963	0.0965	0.366
Clinically diagnosed AD dementia versus CN	seq.18841.1	18841-1	Protein	Serpin B13	SPB13	Q9UIV8	5275	SERPINB13	0.162777	0.0967	0.367
Clinically diagnosed AD dementia versus CN	seq.13979.3	13979-3	Protein	Anion exchange transporter	S26A7	Q8TE54	115111	SLC26A7	0.146737	0.097	0.368
Clinically diagnosed AD dementia versus CN	seq.11356.19	11356-19	Protein	Protein DGCR14	DGC14	Q96DF8	8220	ESS2	0.135573	0.0972	0.369
Clinically diagnosed AD dementia versus CN	seq.22512.18	22512-18	Protein	Neuroguidin	NGDN	Q8NEJ9	25983	NGDN	-0.145263	0.0972	0.369
Clinically diagnosed AD dementia versus CN	seq.2743.5	2743-5	Protein	Sonic hedgehog protein	Sonic Hedgehog	Q15465	6469	SHH	0.160656	0.0973	0.369
Clinically diagnosed AD dementia versus CN	seq.8043.153	8043-153	Protein	Cartilage oligomeric matrix protein	COMP	P49747	1311	COMP	-0.144025	0.0979	0.371
Clinically diagnosed AD dementia versus CN	seq.8975.26	8975-26	Protein	Cell differentiation protein RCD1 homolog	RCD1	Q92600	9125	CNOT9	0.22951	0.098	0.371
Clinically diagnosed AD dementia versus CN	seq.23616.4	23616-4	Protein	Protein-arginine deiminase type-1	PADI1	Q9ULC6	29943	PADI1	-0.147149	0.098	0.371
Clinically diagnosed AD dementia versus CN	seq.22385.2	22385-2	Protein	PWWP domain-containing protein MUM1	MUM1	Q2TAK8	84939	PWWP3A	-0.222727	0.0983	0.372
Clinically diagnosed AD dementia versus CN	seq.9221.6	9221-6	Protein	Inositol 1,4,5-trisphosphate receptor-interacting protein-like 1	IPIL1	Q6GPH6	150771	ITPRIPL1	0.326225	0.0984	0.372
Clinically diagnosed AD dementia versus CN	seq.9343.16	9343-16	Protein	Interleukin-2 receptor subunit beta	IL-2 sRb	P14784	3560	IL2RB	-0.165329	0.0986	0.372
Clinically diagnosed AD dementia versus CN	seq.22842.85	22842-85	Protein	Zinc finger protein 69	ZNF69	Q9UC07	7620	ZNF69	0.153749	0.0986	0.372
Clinically diagnosed AD dementia versus CN	seq.5749.53	5749-53	Protein	Colipase	COL	P04118	1208	CLPS	0.143003	0.0988	0.373
Clinically diagnosed AD dementia versus CN	seq.11436.6	11436-6	Protein	Alpha-internexin	AINX	Q16352	9118	INA	0.14643	0.0989	0.373
Clinically diagnosed AD dementia versus CN	seq.12808.103	12808-103	Protein	Calcium-regulated heat-stable protein 1	CHSP1	Q9Y2V2	23589	CARHSP1	-0.267463	0.0992	0.374
Clinically diagnosed AD dementia versus CN	seq.12423.38	12423-38	Protein	APOBEC1 complementation factor	A1CF	Q9NQ94	29974	A1CF	0.174612	0.0996	0.375
Clinically diagnosed AD dementia versus CN	seq.7190.50	7190-50	Protein	Ephrin type-A receptor 4	EPHA4	P54764	2043	EPHA4	-0.168636	0.0998	0.376
Clinically diagnosed AD dementia versus CN	seq.12459.13	12459-13	Protein	Pleckstrin homology domain-containing family A member 1	PKHA1	Q9HB21	59338	PLEKHA1	-0.186484	0.0998	0.376
Clinically diagnosed AD dementia versus CN	seq.9950.229	9950-229	Protein	Lymphocyte activation gene 3 protein	LAG-3	P18627	3902	LAG3	-0.176747	0.0999	0.376
Clinically diagnosed AD dementia versus CN	seq.6296.36	6296-36	Protein	Oncoprotein-induced transcript 3 protein	OIT3	Q8WWZ8	170392	OIT3	0.146249	0.1	0.376
Clinically diagnosed AD dementia versus CN	seq.13701.2	13701-2	Protein	C-X-C motif chemokine 13	BLC	O43927	10563	CXCL13	0.160407	0.1	0.376
Clinically diagnosed AD dementia versus CN	seq.20536.11	20536-11	Protein	Endothelial cell-selective adhesion molecule	ESAM	Q96AP7	90952	ESAM	0.222688	0.1	0.377
Clinically diagnosed AD dementia versus CN	seq.25043.74	25043-74	Protein	Succinyl-CoA:3-ketoacid-coenzyme A transferase 1, mitochondrial	SCOT	P55809	5019	OXCT1	0.272958	0.1	0.377
Clinically diagnosed AD dementia versus CN	seq.13993.20	13993-20	Protein	Band 4.1-like protein 1	E41L1	Q9H4G0	2036	EPB41L1	-0.19674	0.1	0.377
Clinically diagnosed AD dementia versus CN	seq.3122.6	3122-6	Protein	Diablo homolog, mitochondrial	SMAC	Q9NR28	56616	DIABLO	0.144545	0.1	0.377
Clinically diagnosed AD dementia versus CN	seq.12738.43	12738-43	Protein	Nischarin	NISCH	Q9Y2I1	11188	NISCH	0.151743	0.101	0.377
Clinically diagnosed AD dementia versus CN	seq.22500.9	22500-9	Protein	Mediator of RNA polymerase II transcription subunit 11	MED11	Q9P086	400569	MED11	-0.17451	0.101	0.377
Clinically diagnosed AD dementia versus CN	seq.24321.67	24321-67	Protein	Nuclear prelamin A recognition factor	NARF	Q9UHQ1	26502	NARF	0.202254	0.101	0.378
Clinically diagnosed AD dementia versus CN	seq.13403.5	13403-5	Protein	ETS translocation variant 5	ETV5	P41161	2119	ETV5	0.141901	0.101	0.378
Clinically diagnosed AD dementia versus CN	seq.8644.46	8644-46	Protein	Cathepsin H	Cathepsin H	P09668	1512	CTSH	0.14511	0.101	0.378
Clinically diagnosed AD dementia versus CN	seq.8470.213	8470-213	Protein	Ribonuclease H1	RNase H1	O60930	246243	RNASEH1	0.143984	0.101	0.378
Clinically diagnosed AD dementia versus CN	seq.6027.31	6027-31	Protein	Relaxin-3	REL3	Q8WXF3	117579	RLN3	0.191492	0.101	0.378
Clinically diagnosed AD dementia versus CN	seq.24923.27	24923-27	Protein	Secernin-3	SCRN3	Q0VDG4	79634	SCRN3	-0.196982	0.101	0.378
Clinically diagnosed AD dementia versus CN	seq.3889.64	3889-64	Protein	Lamin-B1	Lamin-B1	P20700	4001	LMNB1	0.140248	0.101	0.378
Clinically diagnosed AD dementia versus CN	seq.21319.196	21319-196	Protein	rRNA methyltransferase 1, mitochondrial	MRM1	Q6IN84	79922	MRM1	-0.175796	0.101	0.378
Clinically diagnosed AD dementia versus CN	seq.6036.78	6036-78	Protein	Ephrin type-A receptor 10	EPHAA	Q5JZY3	284656	EPHA10	0.153788	0.101	0.378
Clinically diagnosed AD dementia versus CN	seq.9049.2	9049-2	Protein	Monocarboxylate transporter 4	MOT4	O15427	9123	SLC16A3	-0.218186	0.101	0.378
Clinically diagnosed AD dementia versus CN	seq.13926.1	13926-1	Protein	RecQ-mediated genome instability protein 1	RMI1	Q9H9A7	80010	RMI1	0.192604	0.101	0.378
Clinically diagnosed AD dementia versus CN	seq.10558.26	10558-26	Protein	Protocadherin-9	PCDH9	Q9HC56	5101	PCDH9	-0.159105	0.102	0.378
Clinically diagnosed AD dementia versus CN	seq.23213.21	23213-21	Protein	Uncharacterized protein C11orf70	CK070	Q9BRQ4	85016	CFAP300	-0.204855	0.102	0.378
Clinically diagnosed AD dementia versus CN	seq.21330.13	21330-13	Protein	Tyrosyl-tRNA synthetase, mitochondrial	SYYM	Q9Y2Z4	51067	YARS2	0.15656	0.102	0.378
Clinically diagnosed AD dementia versus CN	seq.20518.11	20518-11	Protein	Tumor necrosis factor receptor superfamily member 25	DR3	Q93038	8718	TNFRSF25	-0.166134	0.102	0.379
Clinically diagnosed AD dementia versus CN	seq.18286.3	18286-3	Protein	ZW10 interactor	ZWINT	O95229	11130	ZWINT	-0.183924	0.102	0.379
Clinically diagnosed AD dementia versus CN	seq.10798.4	10798-4	Protein	CMRF35-like molecule 2	CLM2	Q496F6	342510	CD300E	-0.171097	0.102	0.379
Clinically diagnosed AD dementia versus CN	seq.12777.11	12777-11	Protein	Splicing factor 1	SF01	Q15637	7536	SF1	0.147548	0.102	0.379
Clinically diagnosed AD dementia versus CN	seq.8074.32	8074-32	Protein	Transmembrane protein 70, mitochondrial	TMM70	Q9BUB7	54968	TMEM70	-0.144686	0.102	0.379
Clinically diagnosed AD dementia versus CN	seq.6290.3	6290-3	Protein	Urotensin-2B	UTS2B	Q765I0	257313	UTS2B	0.170522	0.102	0.379
Clinically diagnosed AD dementia versus CN	seq.13541.1	13541-1	Protein	Myc target protein 1	MYCT1	Q8N699	80177	MYCT1	0.126747	0.102	0.379
Clinically diagnosed AD dementia versus CN	seq.21164.83	21164-83	Protein	Homeobox protein TGIF2LX	TF2LX	Q8IUE1	90316	TGIF2LX	0.136061	0.102	0.379
Clinically diagnosed AD dementia versus CN	seq.11402.17	11402-17	Protein	Histone-lysine N-methyltransferase 2C	KMT2C	Q8NEZ4	58508	KMT2C	0.145747	0.103	0.379
Clinically diagnosed AD dementia versus CN	seq.24670.1	24670-1	Protein	PIH1 domain-containing protein 1	PIHD1	Q9NWS0	55011	PIH1D1	-0.491254	0.103	0.379
Clinically diagnosed AD dementia versus CN	seq.14696.45	14696-45	Protein	Tryptase beta-2	TPSB2	P20231	64499	TPSB2	0.147112	0.103	0.379
Clinically diagnosed AD dementia versus CN	seq.11949.25	11949-25	Protein	Epidermal growth factor:Cytoplasmic domain	EGF:CD	P01133	1950	EGF	-0.173616	0.103	0.379
Clinically diagnosed AD dementia versus CN	seq.23321.42	23321-42	Protein	Coiled-coil domain-containing protein 95	CCD95	Q8NBZ0	283899	INO80E	-0.18604	0.103	0.38
Clinically diagnosed AD dementia versus CN	seq.4261.55	4261-55	Protein	Serum paraoxonase/arylesterase 1	paraoxonase 1	P27169	5444	PON1	0.135872	0.103	0.38
Clinically diagnosed AD dementia versus CN	seq.23591.9	23591-9	Protein	piRNA biogenesis protein EXD1	EXD1	Q8NHP7	161829	EXD1	0.212013	0.103	0.38
Clinically diagnosed AD dementia versus CN	seq.6962.5	6962-5	Protein	HLA class II histocompatibility antigen, DR beta 3 chain	DRB3	P79483	3125	HLA-DRB3	-0.19451	0.103	0.38
Clinically diagnosed AD dementia versus CN	seq.2961.1	2961-1	Protein	Vitamin K-dependent protein C	Protein C	P04070	5624	PROC	-0.173401	0.103	0.38
Clinically diagnosed AD dementia versus CN	seq.21647.9	21647-9	Protein	Spermidine synthase	SPEE	P19623	6723	SRM	-0.16413	0.103	0.38
Clinically diagnosed AD dementia versus CN	seq.18330.7	18330-7	Protein	Phosphoglucomutase-2	PGM2	Q96G03	55276	PGM2	-0.211265	0.104	0.381
Clinically diagnosed AD dementia versus CN	seq.6086.15	6086-15	Protein	Chordin-like protein 2	CRDL2	Q6WN34	25884	CHRDL2	0.160067	0.104	0.381
Clinically diagnosed AD dementia versus CN	seq.10978.39	10978-39	Protein	Growth hormone variant	SOM2	P01242	2689	GH2	0.140062	0.104	0.381
Clinically diagnosed AD dementia versus CN	seq.21229.5	21229-5	Protein	Transmembrane and immunoglobulin domain-containing protein 2	TMIG2	Q96BF3	126259	TMIGD2	-0.164016	0.104	0.381
Clinically diagnosed AD dementia versus CN	seq.21117.18	21117-18	Protein	Zinc finger C4H2 domain-containing protein	ZC4H2	Q9NQZ6	55906	ZC4H2	0.148381	0.104	0.381
Clinically diagnosed AD dementia versus CN	seq.10565.19	10565-19	Protein	SLIT and NTRK-like protein 3	SLIK3	O94933	22865	SLITRK3	-0.143968	0.104	0.382
Clinically diagnosed AD dementia versus CN	seq.5792.8	5792-8	Protein	alpha-Fetoprotein	AFP	P02771	174	AFP	0.157166	0.104	0.382
Clinically diagnosed AD dementia versus CN	seq.3508.78	3508-78	Protein	C-C motif chemokine 22	MDC	O00626	6367	CCL22	0.138145	0.104	0.382
Clinically diagnosed AD dementia versus CN	seq.11163.7	11163-7	Protein	Protein FAM162B	F162B	Q5T6X4	221303	FAM162B	0.135452	0.104	0.382
Clinically diagnosed AD dementia versus CN	seq.5617.41	5617-41	Protein	Pro-FMRFamide-related neuropeptide FF	NPFF	O15130	8620	NPFF	0.184994	0.104	0.382
Clinically diagnosed AD dementia versus CN	seq.9837.60	9837-60	Protein	NAD(P)H dehydrogenase [quinone] 1	NAD(P)H dehydrogenase	P15559	1728	NQO1	-0.149152	0.104	0.382
Clinically diagnosed AD dementia versus CN	seq.22518.54	22518-54	Protein	Kinetochore-associated protein NSL1 homolog	NSL1	Q96IY1	25936	NSL1	-0.18201	0.104	0.383
Clinically diagnosed AD dementia versus CN	seq.21832.31	21832-31	Protein	Squamous cell carcinoma antigen 1	SCCA1	P29508	6317	SERPINB3	0.148426	0.105	0.383
Clinically diagnosed AD dementia versus CN	seq.12646.2	12646-2	Protein	Ribulose-phosphate 3-epimerase	RPE	Q96AT9	6120	RPE	0.315347	0.105	0.383
Clinically diagnosed AD dementia versus CN	seq.3394.81	3394-81	Protein	Serine/threonine-protein kinase PLK1	PLK-1	P53350	5347	PLK1	0.142949	0.105	0.383
Clinically diagnosed AD dementia versus CN	seq.15524.30	15524-30	Protein	Phosphoglycerate mutase 2	PGAM2	P15259	5224	PGAM2	0.152342	0.105	0.384
Clinically diagnosed AD dementia versus CN	seq.21663.149	21663-149	Protein	Alpha-N-acetylneuraminide alpha-2,8-sialyltransferase	SIA8A	Q92185	6489	ST8SIA1	-0.155929	0.105	0.384
Clinically diagnosed AD dementia versus CN	seq.23022.5	23022-5	Protein	Rab GDP dissociation inhibitor alpha	RhoGDI	P31150	2664	GDI1	-0.19153	0.105	0.384
Clinically diagnosed AD dementia versus CN	seq.21499.17	21499-17	Protein	5-demethoxyubiquinone hydroxylase, mitochondrial	COQ7	Q99807	10229	COQ7	-0.20798	0.105	0.384
[truncated: 5,291 more rows]

## Sheet: ST-5
Supplementary Table 5: Differentially abundant proteins between biologically defined AD versus CN Core1–.
Differential analyses between biologically defined AD versus CN Core1–
Group	Analytes	SeqID	Type	Target full name	Target	Uniprot ID	Entrez gene ID	Entrez gene symbol	Effect	p-value	p-value FDR
Biologically defined AD versus CN Core1–	seq.22782.80	22782-80	Protein	Kinetochore protein Spc25	SPC25	Q9HBM1	57405	SPC25	0.933905	2.08661e-18	1.27806e-14
Biologically defined AD versus CN Core1–	seq.11293.14	11293-14	Protein	Leucine-rich repeat neuronal protein 1:Cytoplasmic domain	LRRN1:CD	Q6UXK5	57633	LRRN1	1.28483	3.50731e-18	1.27806e-14
Biologically defined AD versus CN Core1–	seq.21115.48	21115-48	Protein	Pre-miRNA 5'-monophosphate methyltransferase	BN3D2	Q7Z5W3	144233	BCDIN3D	-0.697589	6.53335e-13	1.58717e-09
Biologically defined AD versus CN Core1–	seq.12501.10	12501-10	Protein	Tubulin-specific chaperone A	TBCA	O75347	6902	TBCA	-0.725907	1.95298e-12	3.55832e-09
Biologically defined AD versus CN Core1–	seq.7223.60	7223-60	Protein	Protein S100-A13	S100A13	Q99584	6284	S100A13	-0.630715	8.8085e-11	1.28393e-07
Biologically defined AD versus CN Core1–	seq.21508.7	21508-7	Protein	Alpha-N-acetylneuraminide alpha-2,8-sialyltransferase	SIA8A	Q92185	6489	ST8SIA1	-0.639967	2.20046e-10	2.67283e-07
Biologically defined AD versus CN Core1–	seq.10082.251	10082-251	Protein	Neurofilament light polypeptide	NFL	P07196	4747	NEFL	-0.600372	5.09217e-10	5.30168e-07
Biologically defined AD versus CN Core1–	seq.15321.8	15321-8	Protein	Complexin-2	CPLX2	Q6PUV4	10814	CPLX2	0.633887	1.04138e-08	9.48701e-06
Biologically defined AD versus CN Core1–	seq.8337.65	8337-65	Protein	Receptor-type tyrosine-protein phosphatase U	PTPRU	Q92729	10076	PTPRU	-0.636256	1.52754e-08	1.23697e-05
Biologically defined AD versus CN Core1–	seq.22055.31	22055-31	Protein	Forkhead box protein O1A	FOXO1A	Q12778	2308	FOXO1	-0.576003	1.95509e-08	1.42487e-05
Biologically defined AD versus CN Core1–	seq.13022.20	13022-20	Protein	Tumor protein p53-inducible protein 11	P5I11	O14683	9537	TP53I11	-0.511872	5.70046e-08	3.77681e-05
Biologically defined AD versus CN Core1–	seq.7965.25	7965-25	Protein	Hemoglobin subunit theta-1	HBAT	P09105	3049	HBQ1	-0.446259	6.25972e-07	0.000380174
Biologically defined AD versus CN Core1–	seq.25262.6	25262-6	Protein	Centromere/kinetochore protein zw10 homolog	ZW10	O43264	9183	ZW10	-0.450685	7.51961e-07	0.000421561
Biologically defined AD versus CN Core1–	seq.2948.58	2948-58	Protein	Growth hormone receptor	Growth hormone receptor	P10912	2690	GHR	-0.457054	1.54475e-06	0.000804155
Biologically defined AD versus CN Core1–	seq.18336.31	18336-31	Protein	Cytidine deaminase	CDA	P32320	978	CDA	-0.463175	2.47594e-06	0.00120297
Biologically defined AD versus CN Core1–	seq.8760.10	8760-10	Protein	DCN1-like protein 5	DCNL5	Q9BTE7	84259	DCUN1D5	-0.478093	4.59846e-06	0.00191524
Biologically defined AD versus CN Core1–	seq.15548.35	15548-35	Protein	D-3-phosphoglycerate dehydrogenase	SERA	O43175	26227	PHGDH	-0.445921	4.60381e-06	0.00191524
Biologically defined AD versus CN Core1–	seq.25880.14	25880-14	Protein	5-Lipoxygenase	5-Lipoxygenase	P09917	240	ALOX5	0.646099	4.73029e-06	0.00191524
Biologically defined AD versus CN Core1–	seq.9312.8	9312-8	Protein	Zinc-alpha-2-glycoprotein	AZGP1	P25311	563	AZGP1	0.431335	7.36208e-06	0.00282394
Biologically defined AD versus CN Core1–	seq.6485.59	6485-59	Protein	Immunoglobulin lambda-like polypeptide 1	IGLL1	P15814	3543	IGLL1	-0.437068	8.45261e-06	0.00308013
Biologically defined AD versus CN Core1–	seq.10980.11	10980-11	Protein	Acetylcholinesterase	ACES	P22303	43	ACHE	0.435417	1.52818e-05	0.00530351
Biologically defined AD versus CN Core1–	seq.3470.1	3470-1	Protein	E-selectin	sE-Selectin	P16581	6401	SELE	-0.388965	1.96436e-05	0.0065074
Biologically defined AD versus CN Core1–	seq.8484.24	8484-24	Protein	Leptin	Leptin	P41159	3952	LEP	-0.407092	2.4581e-05	0.00778896
Biologically defined AD versus CN Core1–	seq.12370.30	12370-30	Protein	Apolipoprotein F	Apo F	Q13790	319	APOF	0.411107	2.74825e-05	0.00828552
Biologically defined AD versus CN Core1–	seq.3220.40	3220-40	Protein	Proto-oncogene tyrosine-protein kinase receptor Ret	RET	P07949	5979	RET	-0.390659	2.94225e-05	0.00828552
Biologically defined AD versus CN Core1–	seq.2575.5	2575-5	Protein	Leptin	Leptin	P41159	3952	LEP	-0.403581	2.95586e-05	0.00828552
Biologically defined AD versus CN Core1–	seq.23285.51	23285-51	Protein	BTB/POZ domain-containing protein KCTD2	KCTD2	Q14681	23510	KCTD2	-0.45712	3.37403e-05	0.00910737
Biologically defined AD versus CN Core1–	seq.7945.10	7945-10	Protein	Semaphorin-6A	Semaphorin-6A	Q9H2E6	57556	SEMA6A	-0.428554	3.77485e-05	0.00982539
Biologically defined AD versus CN Core1–	seq.17775.8	17775-8	Protein	Transgelin-3	TAGL3	Q9UI15	29114	TAGLN3	0.549238	4.82901e-05	0.0121358
Biologically defined AD versus CN Core1–	seq.6383.90	6383-90	Protein	Tolloid-like protein 1	TLL1	O43897	7092	TLL1	-0.384948	5.09451e-05	0.0123763
Biologically defined AD versus CN Core1–	seq.2418.55	2418-55	Protein	Apolipoprotein E	Apo E	P02649	348	APOE	-0.371405	5.32672e-05	0.012523
Biologically defined AD versus CN Core1–	seq.18332.17	18332-17	Protein	Complexin-1	CPLX1	O14810	10815	CPLX1	0.445177	6.82368e-05	0.0155409
Biologically defined AD versus CN Core1–	seq.8235.48	8235-48	Protein	Secretogranin-1	SCG1	P05060	1114	CHGB	0.392124	7.43292e-05	0.0159797
Biologically defined AD versus CN Core1–	seq.6408.2	6408-2	Protein	Inhibin beta C chain	INHBC	P55103	3626	INHBC	-0.423485	7.45483e-05	0.0159797
Biologically defined AD versus CN Core1–	seq.10737.96	10737-96	Protein	Leukocyte elastase inhibitor	Serpin B1	P30740	1992	SERPINB1	0.421487	7.85479e-05	0.0163559
Biologically defined AD versus CN Core1–	seq.2212.69	2212-69	Protein	Tissue-type plasminogen activator	tPA	P00750	5327	PLAT	-0.354522	8.08194e-05	0.0163614
Biologically defined AD versus CN Core1–	seq.25121.7	25121-7	Protein	Nodal modulator 2	NOMO2	Q5JPE7	283820	NOMO2	-0.368151	8.74215e-05	0.0172197
Biologically defined AD versus CN Core1–	seq.21130.82	21130-82	Protein	Inositol-tetrakisphosphate 1-kinase	ITPK1	Q13572	3705	ITPK1	-0.398642	0.000106501	0.0204258
Biologically defined AD versus CN Core1–	seq.7867.154	7867-154	Protein	Alpha-N-acetylgalactosaminide alpha-2,6-sialyltransferase 1	SIA7A	Q9NSC7	55808	ST6GALNAC1	0.421433	0.0001103	0.020612
Biologically defined AD versus CN Core1–	seq.9207.60	9207-60	Protein	Quinone oxidoreductase-like protein 1	QORL1	O95825	9946	CRYZL1	-0.353089	0.000117014	0.0213199
Biologically defined AD versus CN Core1–	seq.7994.41	7994-41	Protein	ERO1-like protein beta	ERO1B	Q86YB8	56605	ERO1B	-0.469807	0.000120072	0.0213434
Biologically defined AD versus CN Core1–	seq.3446.7	3446-7	Protein	Interleukin-18 receptor 1	IL-18 Ra	Q13478	8809	IL18R1	-0.381729	0.000130706	0.0226806
Biologically defined AD versus CN Core1–	seq.9756.6	9756-6	Protein	Transgelin	TAGL	Q01995	6876	TAGLN	0.405992	0.000136235	0.0226873
Biologically defined AD versus CN Core1–	seq.13732.79	13732-79	Protein	Cardiotrophin-1	Cardiotrophin-1	Q16619	1489	CTF1	0.382645	0.000136971	0.0226873
Biologically defined AD versus CN Core1–	seq.7970.315	7970-315	Protein	Ecto-ADP-ribosyltransferase 3	NAR3	Q13508	419	ART3	0.389415	0.000154237	0.0249795
Biologically defined AD versus CN Core1–	seq.18380.78	18380-78	Protein	Serum albumin	Albumin	P02768	213	ALB	0.368701	0.000166917	0.0259855
Biologically defined AD versus CN Core1–	seq.14318.1	14318-1	Protein	Vacuolar protein sorting-associated protein 29	VPS29	Q9UBQ0	51699	VPS29	-0.507732	0.00016758	0.0259855
Biologically defined AD versus CN Core1–	seq.5728.60	5728-60	Protein	Fc receptor-like protein 1	FCRL1	Q96LA6	115350	FCRL1	-0.352727	0.000185673	0.0271547
Biologically defined AD versus CN Core1–	seq.19553.14	19553-14	Protein	Syntaxin-1A	STX1a	Q16623	6804	STX1A	0.382296	0.000187681	0.0271547
Biologically defined AD versus CN Core1–	seq.2714.78	2714-78	Protein	Endothelial monocyte-activating polypeptide 2	EMAP-2	Q12904	9255	AIMP1	-0.344259	0.000191219	0.0271547
Biologically defined AD versus CN Core1–	seq.13485.20	13485-20	Protein	Transmembrane protein 87B	TM87B	Q96K49	84910	TMEM87B	-0.400267	0.000193509	0.0271547
Biologically defined AD versus CN Core1–	seq.22985.160	22985-160	Protein	Insulin-like growth factor-binding protein 2	IGFBP-2	P18065	3485	IGFBP2	0.355398	0.000202458	0.0271547
Biologically defined AD versus CN Core1–	seq.15640.54	15640-54	Protein	Transgelin	TAGL	Q01995	6876	TAGLN	0.391232	0.000203741	0.0271547
Biologically defined AD versus CN Core1–	seq.12587.65	12587-65	Protein	ADP-ribosylation factor-like protein 2	ARL2	P36404	402	ARL2	-0.356406	0.000204234	0.0271547
Biologically defined AD versus CN Core1–	seq.2617.56	2617-56	Protein	Receptor tyrosine-protein kinase erbB-3	ERBB3	P21860	2065	ERBB3	-0.434099	0.000204927	0.0271547
Biologically defined AD versus CN Core1–	seq.15562.24	15562-24	Protein	Beta-glucuronidase	BGLR	P08236	2990	GUSB	-0.370578	0.000236432	0.0303359
Biologically defined AD versus CN Core1–	seq.21916.82	21916-82	Protein	Ubiquitin thioesterase otulin	OTUL	Q96BN8	90268	OTULIN	0.408912	0.00023726	0.0303359
Biologically defined AD versus CN Core1–	seq.3322.52	3322-52	Protein	Leucine-rich repeats and immunoglobulin-like domains protein 3	LRIG3	Q6UXM1	121227	LRIG3	-0.417515	0.00025299	0.0317895
Biologically defined AD versus CN Core1–	seq.21688.50	21688-50	Protein	Very Late Antigen-4	VLA-4	P13612|P05556	3676|3688	ITGA4|ITGB1	-0.327899	0.000266537	0.0324096
Biologically defined AD versus CN Core1–	seq.16763.11	16763-11	Protein	Leukocyte cell-derived chemotaxin-2	LECT2	O14960	3950	LECT2	-0.367736	0.000266819	0.0324096
Biologically defined AD versus CN Core1–	seq.21940.12	21940-12	Protein	Protein Wnt-10b	WN10B	O00744	7480	WNT10B	-0.39036	0.000287818	0.0343872
Biologically defined AD versus CN Core1–	seq.17350.13	17350-13	Protein	Charged multivesicular body protein 2b	CHM2B	Q9UQN3	25978	CHMP2B	-0.914141	0.000321488	0.0362416
Biologically defined AD versus CN Core1–	seq.7152.5	7152-5	Protein	Hepatitis A virus cellular receptor 2	TIMD3	Q8TDQ0	84868	HAVCR2	-0.349457	0.000322447	0.0362416
Biologically defined AD versus CN Core1–	seq.4337.49	4337-49	Protein	C-reactive protein	CRP	P02741	1401	CRP	-0.316725	0.000322796	0.0362416
Biologically defined AD versus CN Core1–	seq.15426.5	15426-5	Protein	Sialidase-1	NEUR1	Q99519	4758	NEU1	-0.381735	0.00032323	0.0362416
Biologically defined AD versus CN Core1–	seq.5246.64	5246-64	Protein	cGMP-dependent 3',5'-cyclic phosphodiesterase	cGMP-stimulated PDE	O00408	5138	PDE2A	0.317089	0.000342381	0.0378071
Biologically defined AD versus CN Core1–	seq.11288.26	11288-26	Protein	Cytosolic purine 5'-nucleotidase	5NTC	P49902	22978	NT5C2	0.57964	0.000359489	0.0391038
Biologically defined AD versus CN Core1–	seq.3340.53	3340-53	Protein	Thrombospondin-4	TSP4	P35443	7060	THBS4	-0.351454	0.000374752	0.0401646
Biologically defined AD versus CN Core1–	seq.3343.1	3343-1	Protein	Aminoacylase-1	Aminoacylase-1	Q03154	95	ACY1	-0.372344	0.000383033	0.0404571
Biologically defined AD versus CN Core1–	seq.18331.3	18331-3	Protein	Glucosylceramidase	GLCM	P04062	2629	GBA	-0.354096	0.00043215	0.044993
Biologically defined AD versus CN Core1–	seq.7810.20	7810-20	Protein	Complement C1q tumor necrosis factor-related protein 5	C1QTNF5	Q9BXJ0	114902	C1QTNF5	-0.327011	0.000470501	0.0482959
Biologically defined AD versus CN Core1–	seq.23326.10	23326-10	Protein	Glutathione S-transferase A2	GSTA2	P09210	2939	GSTA2	-0.319741	0.00051547	0.0521771
Biologically defined AD versus CN Core1–	seq.18299.13	18299-13	Protein	Calpain small subunit 1	CPNS1	P04632	826	CAPNS1	0.48209	0.000533072	0.0532196
Biologically defined AD versus CN Core1–	seq.12332.7	12332-7	Protein	Eukaryotic elongation factor 2 kinase	EF2K	O00418	29904	EEF2K	0.350071	0.000574568	0.0561165
Biologically defined AD versus CN Core1–	seq.4842.62	4842-62	Protein	Glypican-3	Glypican 3	P51654	2719	GPC3	-0.368974	0.000577489	0.0561165
Biologically defined AD versus CN Core1–	seq.8922.4	8922-4	Protein	Transmembrane and coiled-coil domains protein 3:region 1	TMCC3:region 1	Q9ULS5	57458	TMCC3	-0.313057	0.000619528	0.0581102
Biologically defined AD versus CN Core1–	seq.10342.55	10342-55	Protein	E3 SUMO-protein ligase PIAS4	PIAS4	Q8N2W9	51588	PIAS4	0.368436	0.000620419	0.0581102
Biologically defined AD versus CN Core1–	seq.14341.8	14341-8	Protein	Protein FAM69C	FA69C	Q0P6D2	125704	DIPK1C	-0.343091	0.000626436	0.0581102
Biologically defined AD versus CN Core1–	seq.13665.35	13665-35	Protein	Serine/threonine-protein phosphatase 2A regulatory subunit B'' subunit alpha	PP2A, subunit B	Q06190	5523	PPP2R3A	-0.35867	0.000629899	0.0581102
Biologically defined AD versus CN Core1–	seq.13118.5	13118-5	Protein	SPARC-related modular calcium-binding protein 1	SMOC1	Q9H4F8	64093	SMOC1	0.356272	0.000690911	0.0620772
Biologically defined AD versus CN Core1–	seq.23534.27	23534-27	Protein	Protein RTF2 homolog	RTF2	Q9BY42	51507	RTF2	0.37268	0.000691059	0.0620772
Biologically defined AD versus CN Core1–	seq.3607.71	3607-71	Protein	Dickkopf-related protein 3	DKK3	Q9UBP4	27122	DKK3	0.34961	0.000699345	0.0620772
Biologically defined AD versus CN Core1–	seq.18240.6	18240-6	Protein	Olfactory marker protein	OMP	P47874	4975	OMP	0.384486	0.000706971	0.0620772
Biologically defined AD versus CN Core1–	seq.18917.53	18917-53	Protein	Pancreatic alpha-amylase	Pancreatic alpha-amylase	P04746	279	AMY2A	0.304112	0.000742395	0.0642696
Biologically defined AD versus CN Core1–	seq.17396.23	17396-23	Protein	Alcohol dehydrogenase 1A	ADH1A	P07327	124	ADH1A	-0.322835	0.000749577	0.0642696
Biologically defined AD versus CN Core1–	seq.8468.19	8468-19	Protein	Prostate-specific antigen	PSA	P07288	354	KLK3	0.433481	0.000761932	0.0645693
Biologically defined AD versus CN Core1–	seq.7145.1	7145-1	Protein	Inter-alpha-trypsin inhibitor heavy chain H3	ITIH3	Q06033	3699	ITIH3	0.322285	0.000822441	0.0685613
Biologically defined AD versus CN Core1–	seq.6439.59	6439-59	Protein	Uncharacterized protein C14orf93	CN093	Q9H972	60686	C14orf93	-0.327261	0.000827853	0.0685613
Biologically defined AD versus CN Core1–	seq.8469.41	8469-41	Protein	Insulin-like growth factor-binding protein 2	IGFBP-2	P18065	3485	IGFBP2	0.317306	0.000849933	0.069599
Biologically defined AD versus CN Core1–	seq.8819.3	8819-3	Protein	Insulin-like growth factor-binding protein 2	IGFBP-2	P18065	3485	IGFBP2	0.312339	0.00086035	0.0696692
Biologically defined AD versus CN Core1–	seq.25108.6	25108-6	Protein	Arginyl-tRNA--protein transferase 1	ATE1	O95260	11101	ATE1	-1.07344	0.000872308	0.0698613
Biologically defined AD versus CN Core1–	seq.2570.72	2570-72	Protein	Insulin-like growth factor-binding protein 2	IGFBP-2	P18065	3485	IGFBP2	0.309603	0.000888419	0.0703782
Biologically defined AD versus CN Core1–	seq.3448.13	3448-13	Protein	Insulin receptor	IR	P06213	3643	INSR	-0.316175	0.000904406	0.0708305
Biologically defined AD versus CN Core1–	seq.10557.6	10557-6	Protein	Testis-expressed sequence 29 protein	TEX29	Q8N6K0	121793	TEX29	0.745963	0.000913566	0.0708305
Biologically defined AD versus CN Core1–	seq.7948.129	7948-129	Protein	Glycolipid transfer protein domain-containing protein 2	GLTD2	A6NH11	388323	GLTPD2	-0.313032	0.000937296	0.0710119
Biologically defined AD versus CN Core1–	seq.11361.73	11361-73	Protein	Thymidine phosphorylase	TP	P19971	1890	TYMP	0.495284	0.000945439	0.0710119
Biologically defined AD versus CN Core1–	seq.16915.153	16915-153	Protein	Semaphorin-4A	SEM4A	Q9H3S1	64218	SEMA4A	-0.297295	0.000965485	0.0710119
Biologically defined AD versus CN Core1–	seq.7050.5	7050-5	Protein	Neuronal growth regulator 1	NEGR1	Q7Z3B1	257194	NEGR1	0.352676	0.000991256	0.0710119
Biologically defined AD versus CN Core1–	seq.7127.3	7127-3	Protein	Apolipoprotein A-II	Apo A-II	P02652	336	APOA2	-0.342503	0.000996482	0.0710119
Biologically defined AD versus CN Core1–	seq.12986.12	12986-12	Protein	Protein lin-7 homolog C	LIN7C	Q9NUP9	55327	LIN7C	0.344263	0.000998057	0.0710119
Biologically defined AD versus CN Core1–	seq.10970.3	10970-3	Protein	Ecto-ADP-ribosyltransferase 3	NAR3	Q13508	419	ART3	0.317906	0.0010025	0.0710119
Biologically defined AD versus CN Core1–	seq.16035.8	16035-8	Protein	Vascular endothelial growth factor receptor 3	VEGF sR3	P35916	2324	FLT4	-0.408856	0.00100521	0.0710119
Biologically defined AD versus CN Core1–	seq.5015.15	5015-15	Protein	Platelet-activating factor acetylhydrolase	PAFAH	Q13093	7941	PLA2G7	0.3145	0.00101213	0.0710119
Biologically defined AD versus CN Core1–	seq.20540.65	20540-65	Protein	Semaphorin-4G	SEM4G	Q9NTN9	57715	SEMA4G	-0.323987	0.00101334	0.0710119
Biologically defined AD versus CN Core1–	seq.2855.49	2855-49	Protein	Mitogen-activated protein kinase 3	ERK-1	P27361	5595	MAPK3	-1.35398	0.00103296	0.0716971
Biologically defined AD versus CN Core1–	seq.4153.11	4153-11	Protein	Alpha-1-antichymotrypsin complex	alpha-1-antichymotrypsin complex	P01011	12	SERPINA3	0.525069	0.0010563	0.0726259
Biologically defined AD versus CN Core1–	seq.17366.6	17366-6	Protein	DCN1-like protein 1	DCNL1	Q96GG9	54165	DCUN1D1	-0.2902	0.00113499	0.0773066
Biologically defined AD versus CN Core1–	seq.5620.13	5620-13	Protein	Peptidyl-glycine alpha-amidating monooxygenase	AMD	P19021	5066	PAM	-0.454759	0.00119483	0.0804614
Biologically defined AD versus CN Core1–	seq.9229.9	9229-9	Protein	Chymotrypsin-like protease CTRL-1	CTRL	P40313	1506	CTRL	0.3715	0.00120339	0.0804614
Biologically defined AD versus CN Core1–	seq.20175.17	20175-17	Protein	Collagen alpha-3(IX) chain	CO9A3	Q14050	1299	COL9A3	0.297435	0.00122678	0.0807876
Biologically defined AD versus CN Core1–	seq.16836.1	16836-1	Protein	Complement factor H-related protein 3	FHR3	Q02985	10878	CFHR3	0.399072	0.00123591	0.0807876
Biologically defined AD versus CN Core1–	seq.20241.9	20241-9	Protein	Synaptosomal-associated protein 23	SNP23	O00161	8773	SNAP23	0.302072	0.00124152	0.0807876
Biologically defined AD versus CN Core1–	seq.13039.1	13039-1	Protein	Nuclear inhibitor of protein phosphatase 1	PP1R8	Q12972	5511	PPP1R8	0.305748	0.00128069	0.0825989
Biologically defined AD versus CN Core1–	seq.9723.105	9723-105	Protein	Multimerin-2	EMILIN-3	Q9H8L6	79812	MMRN2	0.353998	0.00133054	0.0850553
Biologically defined AD versus CN Core1–	seq.9284.25	9284-25	Protein	Secreted frizzled-related protein 4	SFRP4	Q6FHJ7	6424	SFRP4	-0.333931	0.00134854	0.0850553
Biologically defined AD versus CN Core1–	seq.9213.24	9213-24	Protein	Formimidoyltransferase-cyclodeaminase	FTCD	O95954	10841	FTCD	-0.315828	0.00135379	0.0850553
Biologically defined AD versus CN Core1–	seq.3285.23	3285-23	Protein	Complement C1r subcomponent	C1r	P00736	715	C1R	-0.315669	0.00138206	0.0860891
Biologically defined AD versus CN Core1–	seq.2937.10	2937-10	Protein	Apolipoprotein E (isoform E3)	Apo E3	P02649	348	APOE	-0.278739	0.00146146	0.0901429
Biologically defined AD versus CN Core1–	seq.22082.25	22082-25	Protein	Protein BEX2	BEX2	Q9BXY8	84707	BEX2	0.353104	0.00147187	0.0901429
Biologically defined AD versus CN Core1–	seq.4355.13	4355-13	Protein	Death-associated protein kinase 2	DAPK2	Q9UIK4	23604	DAPK2	0.34919	0.00149038	0.0905159
Biologically defined AD versus CN Core1–	seq.13055.53	13055-53	Protein	PH and SEC7 domain-containing protein 1	PSD1	A5PKW4	5662	PSD	0.303163	0.00159739	0.096213
Biologically defined AD versus CN Core1–	seq.10445.20	10445-20	Protein	Apolipoprotein M	ApoM	O95445	55937	APOM	0.306804	0.00167055	0.0997947
Biologically defined AD versus CN Core1–	seq.14079.14	14079-14	Protein	Interleukin-18 receptor 1	IL-18 Ra	Q13478	8809	IL18R1	-0.30206	0.00169997	0.100726
Biologically defined AD versus CN Core1–	seq.15368.3	15368-3	Protein	BMP-binding endothelial regulator protein	BMPER	Q8N8U9	168667	BMPER	-0.353241	0.00173192	0.101792
Biologically defined AD versus CN Core1–	seq.9100.32	9100-32	Protein	Uncharacterized protein C5orf46	CE046	Q6UWT4	389336	C5orf46	0.74395	0.00178117	0.103228
Biologically defined AD versus CN Core1–	seq.8973.23	8973-23	Protein	Fc receptor-like protein 4:Extracellular domain	FCRL4:ECD	Q96PJ5	83417	FCRL4	-0.286753	0.00179006	0.103228
Biologically defined AD versus CN Core1–	seq.25251.6	25251-6	Protein	Ectonucleotide pyrophosphatase/phosphodiesterase family member 3	ENPP3	O14638	5169	ENPP3	0.351917	0.00179884	0.103228
Biologically defined AD versus CN Core1–	seq.6586.19	6586-19	Protein	Disintegrin and metalloproteinase domain-containing protein 11	ADA11	O75078	4185	ADAM11	-0.294838	0.00184712	0.104835
Biologically defined AD versus CN Core1–	seq.5496.49	5496-49	Protein	Spondin-1	Spondin-1	Q9HCB6	10418	SPON1	0.333943	0.00186149	0.104835
Biologically defined AD versus CN Core1–	seq.10003.15	10003-15	Protein	Zinc finger protein 41	ZNF41	P51814	7592	ZNF41	0.434733	0.00187	0.104835
Biologically defined AD versus CN Core1–	seq.5456.59	5456-59	Protein	Beta-Ala-His dipeptidase	CNDP1	Q96KN2	84735	CNDP1	-0.528218	0.00199263	0.110857
Biologically defined AD versus CN Core1–	seq.14146.92	14146-92	Protein	Histone H3.1	H31	P68431	8350	H3C1	0.289907	0.00210359	0.116144
Biologically defined AD versus CN Core1–	seq.3629.60	3629-60	Protein	Serine/threonine-protein kinase MRCK beta	MRCKB	Q9Y5S2	9578	CDC42BPB	0.367891	0.00213488	0.116455
Biologically defined AD versus CN Core1–	seq.7911.29	7911-29	Protein	Sodium channel subunit beta-4	SCN4B	Q8IWT1	6330	SCN4B	0.310066	0.00215133	0.116455
Biologically defined AD versus CN Core1–	seq.25057.2	25057-2	Protein	Alpha-actinin-4	ACTN4	O43707	81	ACTN4	0.468616	0.00215716	0.116455
Biologically defined AD versus CN Core1–	seq.7267.2	7267-2	Protein	Serine palmitoyltransferase 2	LCB2	O15270	9517	SPTLC2	0.385374	0.0021959	0.117675
Biologically defined AD versus CN Core1–	seq.8325.37	8325-37	Protein	Alcohol dehydrogenase 4	ADH4	P08319	127	ADH4	-0.291163	0.00225258	0.119831
Biologically defined AD versus CN Core1–	seq.2925.9	2925-9	Protein	Plasminogen activator inhibitor 1	PAI-1	P05121	5054	SERPINE1	-0.302686	0.00237688	0.124935
Biologically defined AD versus CN Core1–	seq.21232.39	21232-39	Protein	Benign Prostate specific Antigen	BPSA	P07288	354	KLK3	0.397088	0.00238282	0.124935
Biologically defined AD versus CN Core1–	seq.5668.49	5668-49	Protein	Anterior gradient protein 3	AGR3	Q8TD06	155465	AGR3	-0.267789	0.00243167	0.126244
Biologically defined AD versus CN Core1–	seq.3636.37	3636-37	Protein	Oxidized low-density lipoprotein receptor 1	OLR1	P78380	4973	OLR1	0.283667	0.0024708	0.126244
Biologically defined AD versus CN Core1–	seq.4564.2	4564-2	Protein	Plexin-C1	PLXC1	O60486	10154	PLXNC1	-0.310862	0.00247155	0.126244
Biologically defined AD versus CN Core1–	seq.14670.1	14670-1	Protein	Ski-like protein	SKIL	P12757	6498	SKIL	0.479224	0.002485	0.126244
Biologically defined AD versus CN Core1–	seq.8660.5	8660-5	Protein	Olfactomedin-like protein 3	OLFL3	Q9NRN5	56944	OLFML3	-0.392806	0.0024944	0.126244
Biologically defined AD versus CN Core1–	seq.15553.22	15553-22	Protein	Acetylcholinesterase	ACES	P22303	43	ACHE	0.512364	0.00252329	0.126826
Biologically defined AD versus CN Core1–	seq.21574.106	21574-106	Protein	S100 calcium-binding protein A15	S100A15	Q86SG5	338324	S100A7A	0.296238	0.00254703	0.127142
Biologically defined AD versus CN Core1–	seq.15606.19	15606-19	Protein	Keratin, type I cytoskeletal 19	Keratin 19	P08727	3880	KRT19	-0.300255	0.00262011	0.128672
Biologically defined AD versus CN Core1–	seq.9058.1	9058-1	Protein	Mitochondrial import inner membrane translocase subunit Tim21	TIM21	Q9BVV7	29090	TIMM21	-0.312864	0.00262485	0.128672
Biologically defined AD versus CN Core1–	seq.12562.1	12562-1	Protein	Serine/threonine-protein kinase N1	PKN1	Q16512	5585	PKN1	0.453174	0.00263065	0.128672
Biologically defined AD versus CN Core1–	seq.13697.51	13697-51	Protein	Glycerol-3-phosphate dehydrogenase [NAD(+)], cytoplasmic	GPDA	P21695	2819	GPD1	-0.422535	0.00271486	0.131906
Biologically defined AD versus CN Core1–	seq.6897.38	6897-38	Protein	Galactosylgalactosylxylosylprotein 3-beta-glucuronosyltransferase 3	B3GA3	O94766	26229	B3GAT3	-0.389463	0.00274249	0.131907
Biologically defined AD versus CN Core1–	seq.22417.10	22417-10	Protein	E3 ubiquitin-protein ligase CBL-C	CBLC	Q9ULV8	23624	CBLC	-0.309266	0.00275108	0.131907
Biologically defined AD versus CN Core1–	seq.3505.6	3505-6	Protein	Lymphotoxin alpha1:beta2	Lymphotoxin a1/b2	P01374|Q06643	4049|4050	LTA|LTB	-0.328604	0.00278617	0.132291
Biologically defined AD versus CN Core1–	seq.4541.49	4541-49	Protein	Cell adhesion molecule-related/down-regulated by oncogenes	CDON	Q4KMG0	50937	CDON	-0.305109	0.0027954	0.132291
Biologically defined AD versus CN Core1–	seq.13575.40	13575-40	Protein	Segment polarity protein dishevelled homolog DVL-2	DVL2	O14641	1856	DVL2	-0.278245	0.0028707	0.134349
Biologically defined AD versus CN Core1–	seq.13681.173	13681-173	Protein	Casein kinase II subunit alpha'	CSK22	P19784	1459	CSNK2A2	0.36642	0.00287575	0.134349
Biologically defined AD versus CN Core1–	seq.4569.52	4569-52	Protein	VPS10 domain-containing receptor SorCS2	SORC2	Q96PQ0	57537	SORCS2	0.283162	0.00294264	0.136513
Biologically defined AD versus CN Core1–	seq.23320.11	23320-11	Protein	Multivesicular body subunit 12B	MB12B	Q9H7P6	89853	MVB12B	0.480136	0.00295952	0.136513
Biologically defined AD versus CN Core1–	seq.13228.75	13228-75	Protein	E3 ubiquitin-protein ligase Mdm2	MDM2	Q00987	4193	MDM2	-0.35355	0.00302792	0.138278
Biologically defined AD versus CN Core1–	seq.7893.19	7893-19	Protein	Oxidized low-density lipoprotein receptor 1	OLR1	P78380	4973	OLR1	0.280509	0.00303573	0.138278
Biologically defined AD versus CN Core1–	seq.24425.8	24425-8	Protein	Methionyl-tRNA synthetase, cytoplasmic	SYMC	P56192	4141	MARS1	-0.82593	0.00310091	0.139858
Biologically defined AD versus CN Core1–	seq.23341.16	23341-16	Protein	Meiotic recombination protein DMC1/LIM15 homolog	DMC1	Q14565	11144	DMC1	0.587856	0.0031088	0.139858
Biologically defined AD versus CN Core1–	seq.3348.49	3348-49	Protein	Bone morphogenetic protein 1	BMP-1	P13497	649	BMP1	-0.258612	0.00317064	0.141612
Biologically defined AD versus CN Core1–	seq.24926.9	24926-9	Protein	Far upstream element-binding protein 2	FUBP2	Q92945	8570	KHSRP	-0.339602	0.00319185	0.141612
Biologically defined AD versus CN Core1–	seq.2938.55	2938-55	Protein	Apolipoprotein E (isoform E4)	Apo E4	P02649	348	APOE	-0.254761	0.00320608	0.141612
Biologically defined AD versus CN Core1–	seq.2681.23	2681-23	Protein	Hepatocyte growth factor	HGF	P14210	3082	HGF	-0.310266	0.00323858	0.142172
Biologically defined AD versus CN Core1–	seq.20133.1	20133-1	Protein	Melanoma-associated antigen 3	MAGE-3	P43357	4102	MAGEA3	-0.348047	0.00327948	0.142172
Biologically defined AD versus CN Core1–	seq.5852.6	5852-6	Protein	Protein S100-A12	S100A12	P80511	6283	S100A12	0.282908	0.00329567	0.142172
Biologically defined AD versus CN Core1–	seq.17817.22	17817-22	Protein	DNA damage-inducible transcript 4 protein	DDIT4	Q9NX09	54541	DDIT4	0.328893	0.0032968	0.142172
Biologically defined AD versus CN Core1–	seq.13447.42	13447-42	Protein	Shadow of prion protein	SPRN	Q5BIV9	503542	SPRN	0.462311	0.00343021	0.147055
Biologically defined AD versus CN Core1–	seq.3773.15	3773-15	Protein	Angiopoietin-1 receptor, soluble	sTie-2	Q02763	7010	TEK	-0.261892	0.00347798	0.148115
Biologically defined AD versus CN Core1–	seq.5009.11	5009-11	Protein	Moesin	Moesin	P26038	4478	MSN	0.308785	0.00355804	0.148115
Biologically defined AD versus CN Core1–	seq.21238.40	21238-40	Protein	CDK5 regulatory subunit-associated protein 3	CK5P3	Q96JB5	80279	CDK5RAP3	-0.298157	0.0035599	0.148115
Biologically defined AD versus CN Core1–	seq.3202.28	3202-28	Protein	Kremen protein 2	KREM2	Q8NCW0	79412	KREMEN2	0.363997	0.0035681	0.148115
Biologically defined AD versus CN Core1–	seq.3059.50	3059-50	Protein	Tumor necrosis factor ligand superfamily member 13B	BAFF	Q9Y275	10673	TNFSF13B	-0.315007	0.00356908	0.148115
Biologically defined AD versus CN Core1–	seq.13067.5	13067-5	Protein	cGMP-dependent protein kinase 1, beta isozyme	KGP1B	Q13976	5592	PRKG1	0.430474	0.00357686	0.148115
Biologically defined AD versus CN Core1–	seq.15613.16	15613-16	Protein	Pancreatic triacylglycerol lipase	LIPP	P16233	5406	PNLIP	0.26657	0.0036191	0.148435
Biologically defined AD versus CN Core1–	seq.13738.8	13738-8	Protein	Inhibin beta A chain	Inhibin bA chain	P08476	3624	INHBA	-0.268247	0.0036479	0.148435
Biologically defined AD versus CN Core1–	seq.5353.89	5353-89	Protein	Interleukin-1 receptor antagonist protein	IL-1Ra	P18510	3557	IL1RN	-0.274988	0.00365501	0.148435
Biologically defined AD versus CN Core1–	seq.16049.43	16049-43	Protein	Oxidized low-density lipoprotein receptor 1	OLR1	P78380	4973	OLR1	0.266704	0.00366775	0.148435
Biologically defined AD versus CN Core1–	seq.14125.5	14125-5	Protein	Apolipoprotein M	ApoM	O95445	55937	APOM	0.297022	0.00368643	0.148435
Biologically defined AD versus CN Core1–	seq.23350.66	23350-66	Protein	Protein FAM118B	F118B	Q9BPY3	79607	FAM118B	0.730748	0.00379194	0.151844
Biologically defined AD versus CN Core1–	seq.5252.33	5252-33	Protein	Dual 3',5'-cyclic-AMP and -GMP phosphodiesterase 11A	PDE11	Q9HCR9	50940	PDE11A	-0.810596	0.00382834	0.152464
Biologically defined AD versus CN Core1–	seq.15483.377	15483-377	Protein	Agrin	Agrin	O00468	375790	AGRN	-0.27039	0.00385999	0.152889
Biologically defined AD versus CN Core1–	seq.3030.3	3030-3	Protein	C-type lectin domain family 4 member M	DC-SIGNR	Q9H2X3	10332	CLEC4M	0.469155	0.00395116	0.155655
Biologically defined AD versus CN Core1–	seq.14073.31	14073-31	Protein	Hemopexin	Hemopexin	P02790	3263	HPX	0.254736	0.00402127	0.157565
Biologically defined AD versus CN Core1–	seq.24957.6	24957-6	Protein	Espin	ESPN	B1AK53	83715	None	-0.259365	0.00410296	0.159906
Biologically defined AD versus CN Core1–	seq.15403.53	15403-53	Protein	DNA-binding protein inhibitor ID-2	ID2	Q02363	3398	ID2	0.2834	0.00417461	0.16101
Biologically defined AD versus CN Core1–	seq.6915.2	6915-2	Protein	CD164 sialomucin-like 2 protein	C16L2	Q6UWJ8	388611	CD164L2	0.327051	0.00421756	0.16101
Biologically defined AD versus CN Core1–	seq.6326.20	6326-20	Protein	Bone morphogenetic protein 4	BMP-4	P12644	652	BMP4	0.309468	0.00422883	0.16101
Biologically defined AD versus CN Core1–	seq.2705.5	2705-5	Protein	C-C motif chemokine 25	TECK	O15444	6370	CCL25	-0.246625	0.00423139	0.16101
Biologically defined AD versus CN Core1–	seq.17447.52	17447-52	Protein	Secreted frizzled-related protein 4	SFRP4	Q6FHJ7	6424	SFRP4	-0.277612	0.00424174	0.16101
Biologically defined AD versus CN Core1–	seq.18435.40	18435-40	Protein	UBX domain-containing protein 2B	UBX2B	Q14CS0	137886	UBXN2B	0.419309	0.00427329	0.161366
Biologically defined AD versus CN Core1–	seq.20398.60	20398-60	Protein	Ribonuclease P protein subunit p20	POP7	O75817	10248	POP7	-0.262964	0.00433688	0.162924
Biologically defined AD versus CN Core1–	seq.2603.61	2603-61	Protein	T-lymphocyte activation antigen CD80	B7	P33681	941	CD80	0.328855	0.00436892	0.163286
Biologically defined AD versus CN Core1–	seq.12343.14	12343-14	Protein	Arf-GAP with coiled-coil, ANK repeat and PH domain-containing protein 2	CENB2	Q15057	23527	ACAP2	0.342726	0.00445618	0.165697
Biologically defined AD versus CN Core1–	seq.15556.49	15556-49	Protein	Alpha-amylase 2B	Alpha-amylase 2B	P19961	280	AMY2B	0.253222	0.00451575	0.16706
Biologically defined AD versus CN Core1–	seq.21786.25	21786-25	Protein	Cyclin-dependent kinase-like 2	CDKL2	Q92772	8999	CDKL2	0.601267	0.00454753	0.167386
Biologically defined AD versus CN Core1–	seq.7928.183	7928-183	Protein	Protein-tyrosine sulfotransferase 1	TPST1	O60507	8460	TPST1	-0.351183	0.00458161	0.167793
Biologically defined AD versus CN Core1–	seq.21415.212	21415-212	Protein	Mitogen-activated protein kinase kinase kinase 3	MAP3K3	Q99759	4215	MAP3K3	0.257413	0.00460726	0.167888
Biologically defined AD versus CN Core1–	seq.8969.49	8969-49	Protein	Monocyte differentiation antigen CD14	CD14	P08571	929	CD14	0.267541	0.00467341	0.169452
Biologically defined AD versus CN Core1–	seq.5744.12	5744-12	Protein	Protein MENT	CA056	Q9BUN1	54964	MENT	0.30048	0.00471044	0.169949
Biologically defined AD versus CN Core1–	seq.15347.12	15347-12	Protein	Hemopexin	Hemopexin	P02790	3263	HPX	0.246995	0.00477719	0.171508
Biologically defined AD versus CN Core1–	seq.9317.4	9317-4	Protein	Leucine-rich repeat-containing protein 25:Extracellular domain	LRC25:ECD	Q8N386	126364	LRRC25	0.323465	0.00481137	0.171889
Biologically defined AD versus CN Core1–	seq.3412.7	3412-7	Protein	Apoptosis regulator Bcl-2	Bcl-2	P10415	596	BCL2	0.323566	0.00494049	0.175427
Biologically defined AD versus CN Core1–	seq.16831.7	16831-7	Protein	Docking protein 1	DOK1	Q99704	1796	DOK1	0.882314	0.004978	0.175427
Biologically defined AD versus CN Core1–	seq.3810.50	3810-50	Protein	Tyrosine-protein kinase Fgr	FGR	P09769	2268	FGR	0.285919	0.00498262	0.175427
Biologically defined AD versus CN Core1–	seq.24055.44	24055-44	Protein	Cleavage stimulation factor 50 kDa subunit	CSTF1	Q05048	1477	CSTF1	0.379731	0.00504189	0.17666
Biologically defined AD versus CN Core1–	seq.14030.21	14030-21	Protein	Tumor necrosis factor ligand superfamily member 4	OX40 Ligand	P23510	7292	TNFSF4	0.335877	0.00507409	0.176938
Biologically defined AD versus CN Core1–	seq.21160.4	21160-4	Protein	Charged multivesicular body protein 6	CHMP6	Q96FZ7	79643	CHMP6	0.513005	0.00516203	0.179147
Biologically defined AD versus CN Core1–	seq.7081.2	7081-2	Protein	Butyrophilin subfamily 3 member A1	BT3A1	O00481	11119	BTN3A1	0.283194	0.00524608	0.180567
Biologically defined AD versus CN Core1–	seq.13453.2	13453-2	Protein	39S ribosomal protein L33, mitochondrial	RM33	O75394	9553	MRPL33	0.524555	0.00527293	0.180567
Biologically defined AD versus CN Core1–	seq.13488.3	13488-3	Protein	Arfaptin-1	ARFP1	P53367	27236	ARFIP1	0.830274	0.00528404	0.180567
Biologically defined AD versus CN Core1–	seq.16324.38	16324-38	Protein	Toll-like receptor 1:Extracellular domain	TLR1:ECD	Q15399	7096	TLR1	0.356359	0.00531115	0.180567
Biologically defined AD versus CN Core1–	seq.11177.16	11177-16	Protein	Keratin, type II cytoskeletal 5	K2C5	P13647	3852	KRT5	-0.283111	0.00533231	0.180567
Biologically defined AD versus CN Core1–	seq.16079.2	16079-2	Protein	Tyrosine-protein kinase Tec	TEC	P42680	7006	TEC	0.570677	0.00535159	0.180567
Biologically defined AD versus CN Core1–	seq.25253.17	25253-17	Protein	Guanine nucleotide-binding protein G(s) subunit alpha isoforms	GNAS	Q5JWF2|P63092	2778|2778	GNAS|GNAS	0.296385	0.00538816	0.180963
Biologically defined AD versus CN Core1–	seq.5708.1	5708-1	Protein	Liver-expressed antimicrobial peptide 2	LEAP2	Q969E1	116842	LEAP2	-0.373307	0.00555604	0.185745
Biologically defined AD versus CN Core1–	seq.11548.84	11548-84	Protein	M-phase inducer phosphatase 1	MPIP1	P30304	993	CDC25A	0.376419	0.0056251	0.187195
Biologically defined AD versus CN Core1–	seq.5694.57	5694-57	Protein	SPARC-related modular calcium-binding protein 1	SMOC1	Q9H4F8	64093	SMOC1	0.285307	0.00573831	0.189384
Biologically defined AD versus CN Core1–	seq.18322.15	18322-15	Protein	Bifunctional arginine demethylase and lysyl-hydroxylase JMJD6	JMJD6	Q6NYC1	23210	JMJD6	0.389716	0.00574284	0.189384
Biologically defined AD versus CN Core1–	seq.15301.24	15301-24	Protein	Acrosomal protein SP-10	sperm protein 10	P26436	56	ACRV1	0.299629	0.00580556	0.190529
Biologically defined AD versus CN Core1–	seq.4162.54	4162-54	Protein	Serotransferrin	Transferrin	P02787	7018	TF	0.238664	0.00582987	0.190529
Biologically defined AD versus CN Core1–	seq.14599.18	14599-18	Protein	Stabilin-1	STAB1	Q9NY15	23166	STAB1	0.332527	0.00592129	0.192641
Biologically defined AD versus CN Core1–	seq.25444.29	25444-29	Protein	Type I inositol 1,4,5-trisphosphate 5-phosphatase	I5P1	Q14642	3632	INPP5A	-0.646033	0.00598297	0.192641
Biologically defined AD versus CN Core1–	seq.23148.100	23148-100	Protein	Endothelial cell-derived lipase	Endothelial lipase	Q9Y5X9	9388	LIPG	-0.241783	0.00599095	0.192641
Biologically defined AD versus CN Core1–	seq.15514.26	15514-26	Protein	Cholinesterase	Pseudocholinesterase	P06276	590	BCHE	-0.251168	0.00600021	0.192641
Biologically defined AD versus CN Core1–	seq.7097.8	7097-8	Protein	Testis-specific chromodomain protein Y 1	CDY1	Q9Y6F8	253175	CDY1	-0.270206	0.0060277	0.192675
Biologically defined AD versus CN Core1–	seq.18398.1	18398-1	Protein	3-oxo-5-beta-steroid 4-dehydrogenase	AK1D1	P51857	6718	AKR1D1	-0.27801	0.00608911	0.193788
Biologically defined AD versus CN Core1–	seq.19150.20	19150-20	Protein	Phosphoribosyl pyrophosphate synthase-associated protein 2	KPRB	O60256	5636	PRPSAP2	-0.588742	0.00617475	0.195659
Biologically defined AD versus CN Core1–	seq.12514.16	12514-16	Protein	tRNA (guanine-N(7)-)-methyltransferase	METTL1	Q9UBP6	4234	METTL1	-0.291389	0.00626207	0.197567
Biologically defined AD versus CN Core1–	seq.23372.112	23372-112	Protein	Endoplasmic reticulum-Golgi intermediate compartment protein 1	ERGI1	Q969X5	57222	ERGIC1	0.247751	0.00628966	0.197582
Biologically defined AD versus CN Core1–	seq.8295.16	8295-16	Protein	Noelin-2	NOE2	O95897	93145	OLFM2	-0.429031	0.00645674	0.200183
Biologically defined AD versus CN Core1–	seq.9936.27	9936-27	Protein	E3 ubiquitin-protein ligase LNX	LNX1	Q8TBB1	84708	LNX1	0.274692	0.00647762	0.200183
Biologically defined AD versus CN Core1–	seq.6626.81	6626-81	Protein	Carbohydrate sulfotransferase 12	CHSTC	Q9NRB3	55501	CHST12	-0.262524	0.00649576	0.200183
Biologically defined AD versus CN Core1–	seq.13113.7	13113-7	Protein	Osteopontin	Osteopontin	P10451	6696	SPP1	0.266748	0.00649886	0.200183
Biologically defined AD versus CN Core1–	seq.17768.50	17768-50	Protein	Hydroxyacid oxidase 1	HAOX1	Q9UJM8	54363	HAO1	-0.291865	0.0065098	0.200183
Biologically defined AD versus CN Core1–	seq.8393.121	8393-121	Protein	Cathepsin F	CATF	Q9UBX1	8722	CTSF	0.301858	0.00664713	0.202519
Biologically defined AD versus CN Core1–	seq.5061.27	5061-27	Protein	ICOS ligand	B7-H2	O75144	23308	ICOSLG	0.249398	0.0066604	0.202519
Biologically defined AD versus CN Core1–	seq.3316.58	3316-58	Protein	Heparin cofactor 2	Heparin cofactor II	P05546	3053	SERPIND1	-0.243109	0.00667157	0.202519
Biologically defined AD versus CN Core1–	seq.16754.40	16754-40	Protein	Peripheral plasma membrane protein CASK	CSKP	O14936	8573	CASK	0.289163	0.00673101	0.202519
Biologically defined AD versus CN Core1–	seq.18271.43	18271-43	Protein	3-oxoacyl-[acyl-carrier-protein] synthase, mitochondrial	OXSM	Q9NWU1	54995	OXSM	-0.7052	0.00673672	0.202519
Biologically defined AD versus CN Core1–	seq.21433.3	21433-3	Protein	Butyrophilin subfamily 3 member A2	BT3A2	P78410	11118	BTN3A2	-0.248989	0.00676893	0.202519
Biologically defined AD versus CN Core1–	seq.5634.39	5634-39	Protein	GDP-fucose protein O-fucosyltransferase 1	OFUT1	Q9H488	23509	POFUT1	-0.336195	0.00678027	0.202519
Biologically defined AD versus CN Core1–	seq.13955.33	13955-33	Protein	Death-associated protein kinase 1	DAPK1	P53355	1612	DAPK1	0.31268	0.00689431	0.20386
Biologically defined AD versus CN Core1–	seq.5249.31	5249-31	Protein	Serine/threonine-protein kinase 17B	DRAK2	O94768	9262	STK17B	0.248936	0.0069034	0.20386
Biologically defined AD versus CN Core1–	seq.8296.117	8296-117	Protein	KDEL motif-containing protein 2	KDEL2	Q7Z4H8	143888	POGLUT3	-0.641492	0.00693298	0.20386
Biologically defined AD versus CN Core1–	seq.21661.82	21661-82	Protein	Dentin matrix protein 4	DMP4	Q8IXL6	56975	FAM20C	-0.266264	0.00693706	0.20386
Biologically defined AD versus CN Core1–	seq.9168.31	9168-31	Protein	C-C motif chemokine 26	Eotaxin-3	Q9Y258	10344	CCL26	0.275462	0.0069886	0.204088
Biologically defined AD versus CN Core1–	seq.9271.101	9271-101	Protein	Stromal interaction molecule 1:Extracellular domain	STIM1:ECD	Q13586	6786	STIM1	0.346055	0.00700081	0.204088
Biologically defined AD versus CN Core1–	seq.23525.27	23525-27	Protein	Nitric oxide synthase-interacting protein	NOSIP	Q9Y314	51070	NOSIP	0.329326	0.00708695	0.205704
Biologically defined AD versus CN Core1–	seq.9896.21	9896-21	Protein	Forkhead box protein G1	FOXGB	P55316	2290	FOXG1	0.272608	0.0071127	0.205704
Biologically defined AD versus CN Core1–	seq.4297.62	4297-62	Protein	Spondin-1	Spondin-1	Q9HCB6	10418	SPON1	0.286332	0.00727806	0.209654
Biologically defined AD versus CN Core1–	seq.25282.6	25282-6	Protein	Antizyme inhibitor 1	AZIN1	O14977	51582	AZIN1	0.273046	0.00738546	0.21191
Biologically defined AD versus CN Core1–	seq.17199.43	17199-43	Protein	Hypoxia-inducible factor 1-alpha inhibitor	HIF1N	Q9NWT6	55662	HIF1AN	0.409019	0.00748845	0.213742
Biologically defined AD versus CN Core1–	seq.22776.40	22776-40	Protein	Nuclear receptor 0B2	SHP	Q15466	8431	NR0B2	0.241789	0.00751619	0.213742
Biologically defined AD versus CN Core1–	seq.9409.11	9409-11	Protein	Tryptase beta-1	TRYB1	Q15661	7177	TPSAB1	-0.258719	0.00753729	0.213742
Biologically defined AD versus CN Core1–	seq.5739.75	5739-75	Protein	Keratinocyte differentiation-associated protein	KTDAP	P60985	388533	KRTDAP	0.279884	0.00759384	0.213752
Biologically defined AD versus CN Core1–	seq.22414.127	22414-127	Protein	Serine/threonine-protein kinase tousled-like 1	TLK1	Q9UKI8	9874	TLK1	0.306552	0.0075963	0.213752
Biologically defined AD versus CN Core1–	seq.19561.216	19561-216	Protein	Plexin-D1	PLXD1	Q9Y4D7	23129	PLXND1	-0.250305	0.00776774	0.217117
Biologically defined AD versus CN Core1–	seq.19503.2	19503-2	Protein	Sorting nexin-3	SNX3	O60493	8724	SNX3	0.495177	0.00777544	0.217117
Biologically defined AD versus CN Core1–	seq.14245.195	14245-195	Protein	Sorting nexin-7	SNX7	Q9UNH6	51375	SNX7	0.291163	0.00782296	0.217452
Biologically defined AD versus CN Core1–	seq.16021.30	16021-30	Protein	Cadherin-8	Cadherin-8	P55286	1006	CDH8	0.253258	0.00784712	0.217452
Biologically defined AD versus CN Core1–	seq.7870.8	7870-8	Protein	Beta-Ala-His dipeptidase	CNDP1	Q96KN2	84735	CNDP1	-0.431708	0.0078972	0.21801
Biologically defined AD versus CN Core1–	seq.9443.137	9443-137	Protein	Cathepsin K	cathepsin K	P43235	1513	CTSK	-0.256217	0.00808782	0.220632
Biologically defined AD versus CN Core1–	seq.3327.27	3327-27	Protein	Netrin-4	NET4	Q9HB63	59277	NTN4	-0.248258	0.00809357	0.220632
Biologically defined AD versus CN Core1–	seq.13068.139	13068-139	Protein	Copper chaperone for superoxide dismutase	CCS	O14618	9973	CCS	0.281859	0.00811207	0.220632
Biologically defined AD versus CN Core1–	seq.5837.49	5837-49	Protein	Leukemia inhibitory factor receptor	LIF sR	P42702	3977	LIFR	-0.277957	0.0081284	0.220632
Biologically defined AD versus CN Core1–	seq.10974.20	10974-20	Protein	Serine protease inhibitor Kazal-type 7	ISK7	P58062	84651	SPINK7	0.263875	0.00816997	0.220632
Biologically defined AD versus CN Core1–	seq.22034.61	22034-61	Protein	Zinc finger and BTB domain-containing protein 16	ZBT16	Q05516	7704	ZBTB16	0.307322	0.00817379	0.220632
Biologically defined AD versus CN Core1–	seq.9172.69	9172-69	Protein	Neutrophil collagenase	MMP-8	P22894	4317	MMP8	0.246567	0.00821714	0.220639
Biologically defined AD versus CN Core1–	seq.23695.1	23695-1	Protein	Fibronectin type III and SPRY domain-containing protein 1	FSD1	Q9BTV5	79187	FSD1	0.315297	0.0082346	0.220639
Biologically defined AD versus CN Core1–	seq.6923.1	6923-1	Protein	Procollagen-lysine,2-oxoglutarate 5-dioxygenase 2	PLOD2	O00469	5352	PLOD2	-0.28229	0.00829279	0.220808
Biologically defined AD versus CN Core1–	seq.3181.50	3181-50	Protein	Cathepsin S	Cathepsin S	P25774	1520	CTSS	-0.257071	0.0083015	0.220808
Biologically defined AD versus CN Core1–	seq.8767.44	8767-44	Protein	Endothelin-converting enzyme 1:Cytoplasmic domain	Endothelin-converting enzyme 1:CD	P42892	1889	ECE1	0.312273	0.00837389	0.221618
Biologically defined AD versus CN Core1–	seq.8006.12	8006-12	Protein	DnaJ homolog subfamily B member 12	DJB12	Q9NXW2	54788	DNAJB12	-0.258105	0.00843389	0.221618
Biologically defined AD versus CN Core1–	seq.9251.28	9251-28	Protein	Epididymis-specific alpha-mannosidase	MA2B2	Q9Y2E5	23324	MAN2B2	-0.234029	0.00845362	0.221618
Biologically defined AD versus CN Core1–	seq.7812.11	7812-11	Protein	Protein S100-A9	calgranulin B	P06702	6280	S100A9	0.29046	0.00847776	0.221618
Biologically defined AD versus CN Core1–	seq.14124.6	14124-6	Protein	Ephrin-A2	Ephrin-A2	O43921	1943	EFNA2	-0.28621	0.008484	0.221618
Biologically defined AD versus CN Core1–	seq.11232.46	11232-46	Protein	Transcobalamin-1	Holo-TC I	P20061	6947	TCN1	0.25884	0.00854928	0.222071
Biologically defined AD versus CN Core1–	seq.22991.9	22991-9	Protein	Melanoma-associated antigen 6	MAGE-6	P43360	4105	MAGEA6	0.259919	0.00857808	0.222071
Biologically defined AD versus CN Core1–	seq.11380.84	11380-84	Protein	RNA-binding protein 24	RBM24	Q9BX46	221662	RBM24	0.321577	0.00859277	0.222071
Biologically defined AD versus CN Core1–	seq.13112.179	13112-179	Protein	Follistatin-related protein 1	FSTL1	Q12841	11167	FSTL1	0.28393	0.0086681	0.223227
Biologically defined AD versus CN Core1–	seq.23689.52	23689-52	Protein	Copine-6	CPNE6	O95741	9362	CPNE6	0.296149	0.00883879	0.225263
Biologically defined AD versus CN Core1–	seq.7784.1	7784-1	Protein	Kininogen-1	Kininogen, HMW	P01042	3827	KNG1	-0.228852	0.00887235	0.225263
Biologically defined AD versus CN Core1–	seq.9880.33	9880-33	Protein	Tryptophan 2,3-dioxygenase	T23O	P48775	6999	TDO2	-0.232808	0.00888352	0.225263
Biologically defined AD versus CN Core1–	seq.12845.18	12845-18	Protein	Sorting nexin-17	SNX17	Q15036	9784	SNX17	0.404178	0.0089149	0.225263
Biologically defined AD versus CN Core1–	seq.3046.31	3046-31	Protein	Resistin	resistin	Q9HD89	56729	RETN	-0.252426	0.00892362	0.225263
Biologically defined AD versus CN Core1–	seq.13524.25	13524-25	Protein	Heparan-sulfate 6-O-sulfotransferase 2	H6ST2	Q96MM7	90161	HS6ST2	0.254346	0.00893264	0.225263
Biologically defined AD versus CN Core1–	seq.2640.3	2640-3	Protein	Macrophage-stimulating protein receptor	MSP R	Q04912	4486	MST1R	0.343842	0.00907332	0.228022
Biologically defined AD versus CN Core1–	seq.17152.10	17152-10	Protein	Killer cell immunoglobulin-like receptor 2DS4	KI2S4	P43632	3809	KIR2DS4	0.402698	0.00924453	0.230125
Biologically defined AD versus CN Core1–	seq.21547.6	21547-6	Protein	Dentin matrix protein 4	DMP4	Q8IXL6	56975	FAM20C	-0.246638	0.00925498	0.230125
Biologically defined AD versus CN Core1–	seq.7880.9	7880-9	Protein	Proteasome subunit alpha type-1	PSA1	P25786	5682	PSMA1	0.303508	0.00927538	0.230125
Biologically defined AD versus CN Core1–	seq.16749.79	16749-79	Protein	Growth/differentiation factor 10	BMP-3b	P55107	2662	GDF10	0.406702	0.00928331	0.230125
Biologically defined AD versus CN Core1–	seq.9715.15	9715-15	Protein	Immunoglobulin superfamily member 3	IGSF3	O75054	3321	IGSF3	-0.295098	0.00941064	0.230588
Biologically defined AD versus CN Core1–	seq.20564.53	20564-53	Protein	Thy-1 membrane glycoprotein	THY1	P04216	7070	THY1	-0.245888	0.00941114	0.230588
Biologically defined AD versus CN Core1–	seq.7018.10	7018-10	Protein	Ribosome biogenesis protein TSR3 homolog	TSR3	Q9UJK0	115939	TSR3	0.297357	0.00941397	0.230588
Biologically defined AD versus CN Core1–	seq.10351.51	10351-51	Protein	Interferon regulatory factor 1	IRF1	P10914	3659	IRF1	-0.257301	0.00942856	0.230588
Biologically defined AD versus CN Core1–	seq.9234.8	9234-8	Protein	Twisted gastrulation protein homolog 1	TWSG1	Q9GZX9	57045	TWSG1	0.259817	0.0094693	0.23081
Biologically defined AD versus CN Core1–	seq.4159.130	4159-130	Protein	Complement factor H	Factor H	P08603	3075	CFH	-0.227939	0.0095113	0.231061
Biologically defined AD versus CN Core1–	seq.3005.5	3005-5	Protein	Tyrosine-protein phosphatase non-receptor type 1	PTP-1B	P18031	5770	PTPN1	0.481712	0.00963078	0.233186
Biologically defined AD versus CN Core1–	seq.12008.3	12008-3	Protein	T-cell antigen CD7	CD7	P09564	924	CD7	0.268389	0.00972628	0.234719
Biologically defined AD versus CN Core1–	seq.2844.53	2844-53	Protein	Tyrosine-protein kinase receptor Tie-1, soluble	sTie-1	P35590	7075	TIE1	-0.241186	0.00989508	0.236324
Biologically defined AD versus CN Core1–	seq.18392.19	18392-19	Protein	Methionine adenosyltransferase 2 subunit beta	MAT2B	Q9NZL9	27430	MAT2B	0.259999	0.0099462	0.236324
Biologically defined AD versus CN Core1–	seq.22544.10	22544-10	Protein	DNA repair protein RAD51 homolog 3	RA51C	O43502	5889	RAD51C	0.462287	0.00994929	0.236324
Biologically defined AD versus CN Core1–	seq.19145.4	19145-4	Protein	Melanoregulin	MREG	Q8N565	55686	MREG	-0.236687	0.00995886	0.236324
Biologically defined AD versus CN Core1–	seq.4459.68	4459-68	Protein	Proprotein convertase subtilisin/kexin type 7	PCSK7	Q16549	9159	PCSK7	-0.290565	0.00997142	0.236324
Biologically defined AD versus CN Core1–	seq.3339.33	3339-33	Protein	Thrombospondin-2	TSP2	P35442	7058	THBS2	-0.263984	0.00998734	0.236324
Biologically defined AD versus CN Core1–	seq.8262.20	8262-20	Protein	Apolipoprotein D	Apo D	P05090	347	APOD	0.325095	0.0100537	0.236378
Biologically defined AD versus CN Core1–	seq.12881.17	12881-17	Protein	Retinol dehydrogenase 16	RDH16	O75452	8608	RDH16	-0.320656	0.0100888	0.236378
Biologically defined AD versus CN Core1–	seq.14097.86	14097-86	Protein	Carbohydrate sulfotransferase 15	ST4S6	Q7LFX5	51363	CHST15	0.256754	0.0101188	0.236378
Biologically defined AD versus CN Core1–	seq.6955.68	6955-68	Protein	Sorting nexin-1	SNX1	Q13596	6642	SNX1	0.336545	0.0102321	0.236378
Biologically defined AD versus CN Core1–	seq.11273.176	11273-176	Protein	Glutathione S-transferase theta-2B	GSTT2	P0CG30	653689	GSTT2B	-0.276745	0.0102989	0.236378
Biologically defined AD versus CN Core1–	seq.13733.5	13733-5	Protein	Interleukin-12 subunit beta	IL-12 p40	P29460	3593	IL12B	-0.239533	0.0103428	0.236378
Biologically defined AD versus CN Core1–	seq.10527.22	10527-22	Protein	ATP-dependent RNA helicase A	DHX9	Q08211	1660	DHX9	0.249112	0.0103475	0.236378
Biologically defined AD versus CN Core1–	seq.9856.22	9856-22	Protein	Deoxyhypusine synthase	DHYS	P49366	1725	DHPS	0.232267	0.0103815	0.236378
Biologically defined AD versus CN Core1–	seq.21510.24	21510-24	Protein	G protein-coupled receptor kinase 5	GRK5	P34947	2869	GRK5	0.273286	0.0103851	0.236378
Biologically defined AD versus CN Core1–	seq.5882.34	5882-34	Protein	Elongation factor 1-beta	EF-1-beta	P24534	1933	EEF1B2	0.348689	0.0104009	0.236378
Biologically defined AD versus CN Core1–	seq.2879.9	2879-9	Protein	Alpha-1-antichymotrypsin	a1-Antichymotrypsin	P01011	12	SERPINA3	0.221242	0.0104201	0.236378
Biologically defined AD versus CN Core1–	seq.11159.14	11159-14	Protein	Mitochondrial ubiquitin ligase activator of NFKB 1:Cytoplasmic domain	MUL1:CD	Q969V5	79594	MUL1	-0.246904	0.0104301	0.236378
Biologically defined AD versus CN Core1–	seq.2949.6	2949-6	Protein	Group 10 secretory phospholipase A2	GX	O15496	8399	PLA2G10	0.251293	0.0104351	0.236378
Biologically defined AD versus CN Core1–	seq.10439.57	10439-57	Protein	Alpha-amylase 2B	Alpha-amylase 2B	P19961	280	AMY2B	0.235141	0.0104437	0.236378
Biologically defined AD versus CN Core1–	seq.11202.70	11202-70	Protein	T-box transcription factor TBX5	TBX5	Q99593	6910	TBX5	0.344315	0.0104767	0.236391
Biologically defined AD versus CN Core1–	seq.7019.13	7019-13	Protein	Semaphorin-7A	Semaphorin-7A	O75326	8482	SEMA7A	-0.240581	0.010525	0.236749
Biologically defined AD versus CN Core1–	seq.2952.75	2952-75	Protein	Insulin-like growth factor I	IGF-I	P05019	3479	IGF1	0.247078	0.0106362	0.238449
Biologically defined AD versus CN Core1–	seq.7935.26	7935-26	Protein	Glycosyltransferase-like protein LARGE1	LARGE	O95461	9215	LARGE1	-0.244627	0.0106661	0.238449
Biologically defined AD versus CN Core1–	seq.6992.67	6992-67	Protein	Hemoglobin subunit delta	HBD	P02042	3045	HBD	0.295006	0.0108106	0.240942
Biologically defined AD versus CN Core1–	seq.10978.39	10978-39	Protein	Growth hormone variant	SOM2	P01242	2689	GH2	0.225107	0.0108821	0.241282
Biologically defined AD versus CN Core1–	seq.18175.65	18175-65	Protein	Synaptic vesicle membrane protein VAT-1 homolog	VAT1	Q99536	10493	VAT1	-0.252519	0.0108931	0.241282
Biologically defined AD versus CN Core1–	seq.5000.52	5000-52	Protein	Galectin-3-binding protein	LG3BP	Q08380	3959	LGALS3BP	-0.236879	0.0109252	0.241282
Biologically defined AD versus CN Core1–	seq.20590.13	20590-13	Protein	Neuropeptide Y	NPY	P01303	4852	NPY	0.236444	0.0110533	0.242264
Biologically defined AD versus CN Core1–	seq.9960.2	9960-2	Protein	TBC1 domain family member 5	TBCD5	Q92609	9779	TBC1D5	0.414791	0.011057	0.242264
Biologically defined AD versus CN Core1–	seq.19163.26	19163-26	Protein	Leucine-rich repeat-containing protein 59	LRC59	Q96AG4	55379	LRRC59	-0.512726	0.0110694	0.242264
Biologically defined AD versus CN Core1–	seq.8402.22	8402-22	Protein	Cytokine-like protein 1	CYTL1	Q9NRR1	54360	CYTL1	0.230789	0.0111509	0.243318
Biologically defined AD versus CN Core1–	seq.3708.62	3708-62	Protein	Alpha-2-macroglobulin	a2-Macroglobulin	P01023	2	A2M	0.294684	0.0112715	0.245213
Biologically defined AD versus CN Core1–	seq.7786.83	7786-83	Protein	C-type lectin domain family 2 member B	CLC2B	Q92478	9976	CLEC2B	0.463116	0.0113781	0.246796
Biologically defined AD versus CN Core1–	seq.15465.79	15465-79	Protein	Protein canopy homolog 4	CNPY4	Q8N129	245812	CNPY4	0.593787	0.0114694	0.24778
Biologically defined AD versus CN Core1–	seq.15295.81	15295-81	Protein	Insulin-like growth factor II:Mature	IGF-II:Mature	P01344	3481	IGF2	0.232932	0.0114914	0.24778
Biologically defined AD versus CN Core1–	seq.19392.6	19392-6	Protein	N(G),N(G)-dimethylarginine dimethylaminohydrolase 1	DDAH1	O94760	23576	DDAH1	0.287606	0.0115876	0.248104
Biologically defined AD versus CN Core1–	seq.7849.3	7849-3	Protein	Glutaminyl-peptide cyclotransferase	Glutaminyl cyclase	Q16769	25797	QPCT	-0.233828	0.0115968	0.248104
Biologically defined AD versus CN Core1–	seq.12451.62	12451-62	Protein	Transcription regulator protein BACH1	BACH1	O14867	571	BACH1	0.27103	0.0116439	0.248104
Biologically defined AD versus CN Core1–	seq.9215.117	9215-117	Protein	Ubiquitin carboxyl-terminal hydrolase 25	UBP25	Q9UHP3	29761	USP25	0.255892	0.0116781	0.248104
Biologically defined AD versus CN Core1–	seq.11187.11	11187-11	Protein	C-type lectin domain family 12 member A	CL12A	Q5QGZ9	160364	CLEC12A	0.223611	0.0116903	0.248104
Biologically defined AD versus CN Core1–	seq.5483.1	5483-1	Protein	Repulsive guidance molecule A	RGMA	Q96B86	56963	RGMA	-0.232355	0.0117107	0.248104
Biologically defined AD versus CN Core1–	seq.23949.12	23949-12	Protein	CD29	CD29	P05556	3688	ITGB1	0.22791	0.0117479	0.24817
Biologically defined AD versus CN Core1–	seq.22783.40	22783-40	Protein	Transcription factor PU.1	SPI1	P17947	6688	SPI1	0.238463	0.0118904	0.250455
Biologically defined AD versus CN Core1–	seq.22952.28	22952-28	Protein	Cyclin-dependent kinase 2-associated protein 2	CDKA2	O75956	10263	CDK2AP2	0.26867	0.0119686	0.251376
Biologically defined AD versus CN Core1–	seq.7202.107	7202-107	Protein	Semaphorin-6C	SEMA6C	Q9H3T2	10500	SEMA6C	-0.224265	0.0121201	0.253826
Biologically defined AD versus CN Core1–	seq.3221.54	3221-54	Protein	Secreted frizzled-related protein 1	SARP-2	Q8N474	6422	SFRP1	-0.265059	0.012318	0.25677
Biologically defined AD versus CN Core1–	seq.9753.17	9753-17	Protein	Ezrin	Ezrin	P15311	7430	EZR	0.59627	0.0123492	0.25677
Biologically defined AD versus CN Core1–	seq.12401.3	12401-3	Protein	AMSH-like protease	STALP	Q96FJ0	57559	STAMBPL1	0.25409	0.0123818	0.25677
Biologically defined AD versus CN Core1–	seq.21834.8	21834-8	Protein	Vacuolar-sorting protein SNF8	SNF8	Q96H20	11267	SNF8	0.252821	0.0124016	0.25677
Biologically defined AD versus CN Core1–	seq.19601.15	19601-15	Protein	Ankyrin repeat and SOCS box protein 9	ASB9	Q96DX5	140462	ASB9	0.252977	0.0124429	0.256896
Biologically defined AD versus CN Core1–	seq.23212.8	23212-8	Protein	Protein EURL homolog	EURL	Q9NYK6	54149	EURL	0.310416	0.0126197	0.259791
Biologically defined AD versus CN Core1–	seq.11150.3	11150-3	Protein	Collagen alpha-1(VI) chain	Collagen a1(VI)	P12109	1291	COL6A1	-0.221385	0.0126545	0.259791
Biologically defined AD versus CN Core1–	seq.11458.30	11458-30	Protein	Poly(rC)-binding protein 1	PCBP1	Q15365	5093	PCBP1	-0.645023	0.0128195	0.261584
Biologically defined AD versus CN Core1–	seq.19266.35	19266-35	Protein	Ras GTPase-activating protein-binding protein 1	G3BP1	Q13283	10146	G3BP1	-0.851872	0.0128866	0.261584
Biologically defined AD versus CN Core1–	seq.11667.29	11667-29	Protein	Tensin-2	TENC1	Q63HR2	23371	TNS2	0.252128	0.0129122	0.261584
Biologically defined AD versus CN Core1–	seq.20139.57	20139-57	Protein	Endophilin-A1	SH3G2	Q99962	6456	SH3GL2	-0.67938	0.012954	0.261584
Biologically defined AD versus CN Core1–	seq.19168.71	19168-71	Protein	Proline-serine-threonine phosphatase-interacting protein 1	PPIP1	O43586	9051	PSTPIP1	0.24421	0.0129547	0.261584
Biologically defined AD versus CN Core1–	seq.12724.81	12724-81	Protein	Cold-inducible RNA-binding protein	CIRBP	Q14011	1153	CIRBP	-0.80958	0.0129572	0.261584
Biologically defined AD versus CN Core1–	seq.22578.17	22578-17	Protein	Roundabout homolog 2	ROBO2	Q9HCK4	6092	ROBO2	-0.262456	0.0130231	0.261847
Biologically defined AD versus CN Core1–	seq.21935.16	21935-16	Protein	Ubiquitin-conjugating enzyme E2 H	UBE2H	P62256	7328	UBE2H	0.31494	0.0130879	0.261847
Biologically defined AD versus CN Core1–	seq.24443.8	24443-8	Protein	Mortality factor 4-like protein 2	MO4L2	Q15014	9643	MORF4L2	0.31228	0.0131447	0.261847
Biologically defined AD versus CN Core1–	seq.6468.37	6468-37	Protein	Tachykinin-4	TKN4	Q86UU9	255061	TAC4	0.28212	0.0131606	0.261847
Biologically defined AD versus CN Core1–	seq.3508.78	3508-78	Protein	C-C motif chemokine 22	MDC	O00626	6367	CCL22	-0.21749	0.0131845	0.261847
Biologically defined AD versus CN Core1–	seq.8287.17	8287-17	Protein	CMRF35-like molecule 2	CLM2	Q496F6	342510	CD300E	-0.273295	0.0131858	0.261847
Biologically defined AD versus CN Core1–	seq.3827.22	3827-22	Protein	Serine/threonine-protein kinase PAK 6	PAK6	Q9NQU5	106821730	PAK6	-0.524116	0.0132487	0.261994
Biologically defined AD versus CN Core1–	seq.11708.2	11708-2	Protein	Lipocalin-1	LCN1	P31025	3933	LCN1	0.233015	0.0132651	0.261994
Biologically defined AD versus CN Core1–	seq.23664.17	23664-17	Protein	Rhotekin	RTKN	Q9BST9	6242	RTKN	0.23557	0.0136369	0.26861
Biologically defined AD versus CN Core1–	seq.2605.49	2605-49	Protein	Tumor necrosis factor receptor superfamily member 8	CD30	P28908	943	TNFRSF8	0.278442	0.0137201	0.26952
Biologically defined AD versus CN Core1–	seq.13470.43	13470-43	Protein	Parathyroid hormone/parathyroid hormone-related peptide receptor	PTH1R	Q03431	5745	PTH1R	0.331941	0.0138045	0.269669
Biologically defined AD versus CN Core1–	seq.24457.12	24457-12	Protein	USF2	USF2	Q15853	7392	USF2	0.246321	0.0139296	0.269669
Biologically defined AD versus CN Core1–	seq.17814.8	17814-8	Protein	3'(2'),5'-bisphosphate nucleotidase 1	BPNT1	O95861	10380	BPNT1	0.566261	0.0139371	0.269669
Biologically defined AD versus CN Core1–	seq.2746.56	2746-56	Protein	Cytokine receptor-like factor 2	TSLP R	Q9HC73	64109	CRLF2	0.295415	0.0139403	0.269669
Biologically defined AD versus CN Core1–	seq.24294.13	24294-13	Protein	Chromosome transmission fidelity protein 8 homolog	CTF8	P0CG13	54921	CHTF8	0.222127	0.0139517	0.269669
Biologically defined AD versus CN Core1–	seq.6508.68	6508-68	Protein	Secretoglobin family 1D member 2	SG1D2	O95969	10647	SCGB1D2	0.510511	0.014114	0.269669
Biologically defined AD versus CN Core1–	seq.11208.15	11208-15	Protein	N-acetylglucosamine-1-phosphodiester alpha-N-acetylglucosaminidase	NAGPA	Q9UK23	51172	NAGPA	-0.246375	0.0141709	0.269669
Biologically defined AD versus CN Core1–	seq.13723.6	13723-6	Protein	Interleukin-10	IL-10	P22301	3586	IL10	-0.266261	0.0141714	0.269669
Biologically defined AD versus CN Core1–	seq.21338.44	21338-44	Protein	Nucleotide exchange factor SIL1	SIL1	Q9H173	64374	SIL1	0.278656	0.0142097	0.269669
Biologically defined AD versus CN Core1–	seq.19152.4	19152-4	Protein	Protein phosphatase inhibitor 2	IPP2	P41236	5504	PPP1R2	-0.457507	0.0142485	0.269669
Biologically defined AD versus CN Core1–	seq.20950.159	20950-159	Protein	Phosphoribosyltransferase domain-containing protein 1	PRDC1	Q9NRG1	56952	PRTFDC1	-0.503951	0.0142575	0.269669
Biologically defined AD versus CN Core1–	seq.7249.37	7249-37	Protein	Bcl-2-like protein 10	B2L10	Q9HD36	10017	BCL2L10	0.310842	0.0142831	0.269669
Biologically defined AD versus CN Core1–	seq.12709.63	12709-63	Protein	Histone H1x	H1X	Q92522	8971	H1-10	0.224138	0.014297	0.269669
Biologically defined AD versus CN Core1–	seq.19488.1	19488-1	Protein	Programmed cell death protein 6	PDCD6	O75340	10016	PDCD6	0.258985	0.0143093	0.269669
Biologically defined AD versus CN Core1–	seq.10047.12	10047-12	Protein	Neutrophil cytosol factor 2	NCF-2	P19878	4688	NCF2	0.579831	0.0143146	0.269669
Biologically defined AD versus CN Core1–	seq.13463.1	13463-1	Protein	Peroxidasin homolog	PXDN	Q92626	7837	PXDN	-0.261696	0.014352	0.269669
Biologically defined AD versus CN Core1–	seq.3182.38	3182-38	Protein	Ectonucleoside triphosphate diphosphohydrolase 1	CD39	P49961	953	ENTPD1	0.317505	0.0144057	0.269669
Biologically defined AD versus CN Core1–	seq.6421.52	6421-52	Protein	Interferon alpha-16	IFN16	P05015	3449	IFNA16	-0.298971	0.0144623	0.269669
Biologically defined AD versus CN Core1–	seq.15431.31	15431-31	Protein	Ornithine carbamoyltransferase, mitochondrial	OTCase	P00480	5009	OTC	-0.252801	0.0145114	0.269669
Biologically defined AD versus CN Core1–	seq.15384.15	15384-15	Protein	Klotho	KLOTHO	Q9UEF7	9365	KL	-0.233056	0.0145191	0.269669
Biologically defined AD versus CN Core1–	seq.13109.82	13109-82	Protein	Neuronal growth regulator 1	NEGR1	Q7Z3B1	257194	NEGR1	0.265742	0.0145573	0.269669
Biologically defined AD versus CN Core1–	seq.22078.4	22078-4	Protein	Tyrosine aminotransferase	ATTY	P17735	6898	TAT	-0.247897	0.0145665	0.269669
Biologically defined AD versus CN Core1–	seq.17151.84	17151-84	Protein	Interferon regulatory factor 3	IRF-3	Q14653	3661	IRF3	-0.875945	0.0145787	0.269669
Biologically defined AD versus CN Core1–	seq.16298.84	16298-84	Protein	Group IID secretory phospholipase A2	sPLA(2)-IID	Q9UNK4	26279	PLA2G2D	0.233264	0.0146767	0.269784
Biologically defined AD versus CN Core1–	seq.23519.91	23519-91	Protein	Transmembrane protein 221	TM221	A6NGB7	100130519	TMEM221	0.260328	0.0146868	0.269784
Biologically defined AD versus CN Core1–	seq.14076.74	14076-74	Protein	Cystatin-S	Cystatin-S	P01036	1472	CST4	-0.223109	0.014696	0.269784
Biologically defined AD versus CN Core1–	seq.6273.58	6273-58	Protein	Prolyl 3-hydroxylase 1	P3H1	Q32P28	64175	P3H1	0.293889	0.0147911	0.270849
Biologically defined AD versus CN Core1–	seq.21239.31	21239-31	Protein	Cytohesin-1	CYH1	Q15438	9267	CYTH1	0.272156	0.014888	0.271261
Biologically defined AD versus CN Core1–	seq.7142.5	7142-5	Protein	Carboxypeptidase N catalytic chain	CBPN	P15169	1369	CPN1	0.230741	0.0148881	0.271261
Biologically defined AD versus CN Core1–	seq.12597.68	12597-68	Protein	Autophagy protein 5	Autophagy protein 5	Q9H1Y0	9474	ATG5	0.30266	0.0149722	0.272113
Biologically defined AD versus CN Core1–	seq.2771.35	2771-35	Protein	Insulin-like growth factor-binding protein 1	IGFBP-1	P08833	3484	IGFBP1	0.215135	0.0150105	0.272131
Biologically defined AD versus CN Core1–	seq.15566.10	15566-10	Protein	Calponin-1	Calponin-1	P51911	1264	CNN1	0.251098	0.0151465	0.273916
Biologically defined AD versus CN Core1–	seq.13540.1	13540-1	Protein	G-protein coupled receptor 26	GPR26	Q8NDV2	2849	GPR26	0.268019	0.0152531	0.274093
Biologically defined AD versus CN Core1–	seq.17692.2	17692-2	Protein	Butyrophilin subfamily 3 member A3	BT3A3	O00478	10384	BTN3A3	-0.229203	0.0152596	0.274093
Biologically defined AD versus CN Core1–	seq.21340.38	21340-38	Protein	Hepatic leukemia factor	HLF	Q16534	3131	HLF	-0.240307	0.0152934	0.274093
Biologically defined AD versus CN Core1–	seq.6060.2	6060-2	Protein	Prolactin-inducible protein	PIP	P12273	5304	PIP	-0.213801	0.0153092	0.274093
Biologically defined AD versus CN Core1–	seq.16060.99	16060-99	Protein	Nidogen-2	NID2	Q14112	22795	NID2	-0.220802	0.0154231	0.274093
Biologically defined AD versus CN Core1–	seq.10012.5	10012-5	Protein	SAM pointed domain-containing Ets transcription factor	SPDEF	O95238	25803	SPDEF	0.264391	0.0154369	0.274093
Biologically defined AD versus CN Core1–	seq.12001.7	12001-7	Protein	Tight junction protein ZO-1	ZO1	Q07157	7082	TJP1	0.256723	0.015453	0.274093
Biologically defined AD versus CN Core1–	seq.4880.21	4880-21	Protein	Growth/differentiation factor 2	GDF2	Q9UK05	2658	GDF2	0.264249	0.0154992	0.274093
Biologically defined AD versus CN Core1–	seq.2987.37	2987-37	Protein	Histone H1.2	Histone H1.2	P16403	3006	H1-2	0.22664	0.015539	0.274093
Biologically defined AD versus CN Core1–	seq.9901.28	9901-28	Protein	Egl nine homolog 1	EGLN1	Q9GZT9	54583	EGLN1	0.330919	0.015568	0.274093
Biologically defined AD versus CN Core1–	seq.8690.25	8690-25	Protein	Caveolin-3	CAV3	P56539	859	CAV3	0.2873	0.015631	0.274093
Biologically defined AD versus CN Core1–	seq.16914.104	16914-104	Protein	Monocyte differentiation antigen CD14, soluble	sCD14	P08571	929	CD14	0.244396	0.0156475	0.274093
Biologically defined AD versus CN Core1–	seq.6467.65	6467-65	Protein	Protein O-glucosyltransferase 1	KTEL1	Q8NBL1	56983	POGLUT1	-0.686841	0.0156744	0.274093
Biologically defined AD versus CN Core1–	seq.3184.25	3184-25	Protein	Coagulation factor VII	Coagulation Factor VII	P08709	2155	F7	-0.242525	0.0156829	0.274093
Biologically defined AD versus CN Core1–	seq.12869.68	12869-68	Protein	Probable ATP-dependent RNA helicase DDX6	DDX6	P26196	1656	DDX6	-0.565447	0.0157611	0.274801
Biologically defined AD versus CN Core1–	seq.6473.55	6473-55	Protein	BPI fold-containing family A member 1	PLUNC	Q9NP55	51297	BPIFA1	0.268962	0.0158367	0.275461
Biologically defined AD versus CN Core1–	seq.2580.83	2580-83	Protein	Myeloperoxidase	Myeloperoxidase	P05164	4353	MPO	0.224355	0.01594	0.276597
Biologically defined AD versus CN Core1–	seq.6941.11	6941-11	Protein	Sulfatase-modifying factor 1	SUMF1	Q8NBK3	285362	SUMF1	0.226046	0.0159819	0.276612
Biologically defined AD versus CN Core1–	seq.12594.5	12594-5	Protein	Grancalcin	GRAN	P28676	25801	GCA	0.249262	0.0160168	0.276612
Biologically defined AD versus CN Core1–	seq.4469.78	4469-78	Protein	Carbohydrate sulfotransferase 15	ST4S6	Q7LFX5	51363	CHST15	0.238322	0.0160787	0.277026
Biologically defined AD versus CN Core1–	seq.18821.9	18821-9	Protein	C4a anaphylatoxin	C4a	P0C0L4|P0C0L5	720|100293534	C4A|C4B	-0.293596	0.0162246	0.27888
Biologically defined AD versus CN Core1–	seq.19377.14	19377-14	Protein	Noelin-2	NOE2	O95897	93145	OLFM2	-0.323366	0.0163343	0.280104
Biologically defined AD versus CN Core1–	seq.2443.10	2443-10	Protein	Fibroblast growth factor 8 isoform B	FGF-8B	P55075	2253	FGF8	0.277669	0.0164354	0.281177
Biologically defined AD versus CN Core1–	seq.4717.55	4717-55	Protein	Interleukin-3	IL-3	P08700	3562	IL3	0.211641	0.0165669	0.281974
Biologically defined AD versus CN Core1–	seq.13490.1	13490-1	Protein	MAGUK p55 subfamily member 6	MPP6	Q9NZW5	51678	MPP6	0.230053	0.0166379	0.281974
Biologically defined AD versus CN Core1–	seq.7011.8	7011-8	Protein	Kv channel-interacting protein 4	KCIP4	Q6PIL6	80333	KCNIP4	0.216303	0.0166462	0.281974
Biologically defined AD versus CN Core1–	seq.21931.27	21931-27	Protein	UB2L3/PolyUbiquitin K48	UB2L3/ PolyUbiquitin K48	P68036|P0CG47	7332|7314	UBE2L3|UBB	0.302094	0.016675	0.281974
Biologically defined AD versus CN Core1–	seq.15533.97	15533-97	Protein	Macrophage scavenger receptor types I and II:Extracellular domain	Macrophage scavenger receptor:ECD	P21757	4481	MSR1	-0.231897	0.0166755	0.281974
Biologically defined AD versus CN Core1–	seq.3066.12	3066-12	Protein	Galectin-3	Galectin-3	P17931	3958	LGALS3	0.233077	0.0167383	0.282382
Biologically defined AD versus CN Core1–	seq.8843.34	8843-34	Protein	Myelin regulatory factor	MRF	Q9Y2G1	745	MYRF	0.268733	0.0168637	0.28384
Biologically defined AD versus CN Core1–	seq.16809.1	16809-1	Protein	Nucleoside diphosphate kinase, mitochondrial	NDKM	O00746	4833	NME4	-0.472935	0.0169481	0.283884
Biologically defined AD versus CN Core1–	seq.5621.64	5621-64	Protein	Thrombospondin type-1 domain-containing protein 1	THSD1	Q9NS62	55901	THSD1	-0.227223	0.0169744	0.283884
Biologically defined AD versus CN Core1–	seq.3217.74	3217-74	Protein	Glia-derived nexin	Protease nexin I	P07093	5270	SERPINE2	0.239927	0.0169832	0.283884
Biologically defined AD versus CN Core1–	seq.21548.20	21548-20	Protein	Gamma-glutamyltransferase 5	GGT5	P36269	2687	GGT5	0.28504	0.0170579	0.284117
Biologically defined AD versus CN Core1–	seq.6433.57	6433-57	Protein	Pseudokinase FAM20A	FA20A	Q96MK3	54757	FAM20A	-0.279147	0.0170893	0.284117
Biologically defined AD versus CN Core1–	seq.14150.7	14150-7	Protein	Interleukin-36 alpha	IL-1F6	Q9UHA7	27179	IL36A	0.254019	0.0171427	0.284117
Biologically defined AD versus CN Core1–	seq.20219.25	20219-25	Protein	Neprilysin	Neprilysin	P08473	4311	MME	0.222943	0.0171531	0.284117
Biologically defined AD versus CN Core1–	seq.8671.378	8671-378	Protein	Trafficking protein particle complex subunit 5	TPPC5	Q8IUR0	126003	TRAPPC5	0.198151	0.0172355	0.284185
Biologically defined AD versus CN Core1–	seq.2789.26	2789-26	Protein	Matrilysin	MMP-7	P09237	4316	MMP7	0.220666	0.0172948	0.284185
Biologically defined AD versus CN Core1–	seq.13744.37	13744-37	Protein	Interleukin-3 receptor subunit alpha	IL-3 Ra	P26951	3563	IL3RA	-0.226687	0.0172981	0.284185
Biologically defined AD versus CN Core1–	seq.2751.16	2751-16	Protein	Azurocidin	Azurocidin	P20160	566	AZU1	0.255091	0.0173304	0.284185
Biologically defined AD versus CN Core1–	seq.11308.8	11308-8	Protein	Cyclic AMP-responsive element-binding protein 3-like protein 4	CR3L4	Q8TEY5	148327	CREB3L4	-0.218895	0.0173521	0.284185
Biologically defined AD versus CN Core1–	seq.7002.1	7002-1	Protein	Matrix-remodeling-associated protein 8:Cytoplasmic domain	MXRA8:CD	Q9BRK3	54587	MXRA8	0.355279	0.0174444	0.285055
Biologically defined AD versus CN Core1–	seq.18400.52	18400-52	Protein	DNA oxidative demethylase ALKBH2	ALKB2	Q6NS38	121642	ALKBH2	0.25451	0.0175696	0.285465
Biologically defined AD versus CN Core1–	seq.9241.40	9241-40	Protein	Signal-regulatory protein gamma	SIRPG	Q9P1W8	55423	SIRPG	0.247264	0.0175855	0.285465
Biologically defined AD versus CN Core1–	seq.16620.26	16620-26	Protein	Lymphocyte antigen 75	LY75	O60449	100526664	LY75	-0.223578	0.017587	0.285465
Biologically defined AD versus CN Core1–	seq.21383.37	21383-37	Protein	Asparaginyl-tRNA synthetase, cytoplasmic	SYNC	O43776	4677	NARS1	-0.621206	0.017704	0.286727
Biologically defined AD versus CN Core1–	seq.19251.56	19251-56	Protein	Serglycin	Platelet proteoglycan	P10124	5552	SRGN	0.26976	0.0178552	0.287215
Biologically defined AD versus CN Core1–	seq.3685.53	3685-53	Protein	Membrane frizzled-related protein	MFRP	Q9BY79	83552	MFRP	0.227993	0.0178596	0.287215
Biologically defined AD versus CN Core1–	seq.23037.37	23037-37	Protein	Ubiquitin-conjugating enzyme E2 D3	UB2D3	P61077	7323	UBE2D3	0.3297	0.0179057	0.287215
Biologically defined AD versus CN Core1–	seq.11696.7	11696-7	Protein	Cellular retinoic acid-binding protein 2	RABP2	P29373	1382	CRABP2	-0.223866	0.0179286	0.287215
Biologically defined AD versus CN Core1–	seq.10046.55	10046-55	Protein	Baculoviral IAP repeat-containing protein 2	cIAP-1	Q13490	329	BIRC2	-0.238802	0.0179312	0.287215
Biologically defined AD versus CN Core1–	seq.22003.4	22003-4	Protein	Paraoxonase 2	Paraoxonase-2	Q15165	5445	PON2	-0.280338	0.0181385	0.28898
Biologically defined AD versus CN Core1–	seq.12438.127	12438-127	Protein	DNA-3-methyladenine glycosylase	3MG	P29372	4350	MPG	0.250849	0.0181429	0.28898
Biologically defined AD versus CN Core1–	seq.5261.13	5261-13	Protein	Abelson tyrosine-protein kinase 2	ABL2	P42684	27	ABL2	0.235103	0.0181761	0.28898
Biologically defined AD versus CN Core1–	seq.7206.20	7206-20	Protein	Fructose-1,6-bisphosphatase 1	F16P1	P09467	2203	FBP1	-0.226507	0.0182	0.28898
Biologically defined AD versus CN Core1–	seq.7191.32	7191-32	Protein	Sarcolemmal membrane-associated protein	SLMAP	Q14BN4	7871	SLMAP	0.306051	0.0182839	0.28968
Biologically defined AD versus CN Core1–	seq.20231.23	20231-23	Protein	Uridine phosphorylase 2	UPP2	O95045	151531	UPP2	0.254041	0.0184585	0.291812
Biologically defined AD versus CN Core1–	seq.20432.6	20432-6	Protein	Pyroglutamyl-peptidase 1	PGPI	Q9NXJ5	54858	PGPEP1	0.280497	0.0186134	0.293316
Biologically defined AD versus CN Core1–	seq.6587.6	6587-6	Protein	Leucine-rich repeat and fibronectin type-III domain-containing protein 5	LRFN5	Q96NI6	145581	LRFN5	0.266059	0.0186341	0.293316
Biologically defined AD versus CN Core1–	seq.5099.14	5099-14	Protein	Lymphocyte activation gene 3 protein	LAG-3	P18627	3902	LAG3	-0.256191	0.0188935	0.295519
Biologically defined AD versus CN Core1–	seq.21796.43	21796-43	Protein	Glutathione peroxidase 3	Glutathione peroxidase 3	P22352	2878	GPX3	0.211536	0.0189135	0.295519
Biologically defined AD versus CN Core1–	seq.18859.7	18859-7	Protein	Eukaryotic translation initiation factor 4E-binding protein 3	4EBP3	O60516	8637	EIF4EBP3	-0.28457	0.018923	0.295519
Biologically defined AD versus CN Core1–	seq.3469.74	3469-74	Protein	Ribosomal protein S6 kinase alpha-3	RPS6KA3	P51812	6197	RPS6KA3	0.648706	0.0189362	0.295519
Biologically defined AD versus CN Core1–	seq.4154.57	4154-57	Protein	P-selectin	P-Selectin	P16109	6403	SELP	-0.334724	0.0191095	0.297072
Biologically defined AD versus CN Core1–	seq.21577.35	21577-35	Protein	FK506-binding protein 5	FKBP5	Q13451	2289	FKBP5	0.723835	0.0191173	0.297072
Biologically defined AD versus CN Core1–	seq.8645.257	8645-257	Protein	Peroxisomal membrane protein PEX14:C-term	PEX14:C-term	O75381	5195	PEX14	0.241815	0.0191973	0.297639
Biologically defined AD versus CN Core1–	seq.15525.294	15525-294	Protein	Alcohol dehydrogenase 1C	ADH1G	P00326	126	ADH1C	-0.225599	0.0192416	0.297639
Biologically defined AD versus CN Core1–	seq.4152.58	4152-58	Protein	Plasma kallikrein	Prekallikrein	P03952	3818	KLKB1	-0.234079	0.019311	0.297639
Biologically defined AD versus CN Core1–	seq.14757.144	14757-144	Protein	Fibroblast growth factor 8 isoform B	FGF-8B	P55075	2253	FGF8	0.213168	0.0193506	0.297639
Biologically defined AD versus CN Core1–	seq.13940.19	13940-19	Protein	Gamma-interferon-inducible protein 16:Isoform 2, Hematopoietic expression, interferon-inducible nature, and nuclear localization 1	IP16:HIN 1	Q16666	3428	IFI16	0.21061	0.0193579	0.297639
Biologically defined AD versus CN Core1–	seq.25287.7	25287-7	Protein	Eukaryotic translation initiation factor 4 gamma 1	IF4G1	Q04637	1981	EIF4G1	0.697221	0.0194713	0.298751
Biologically defined AD versus CN Core1–	seq.9970.7	9970-7	Protein	UBX domain-containing protein 4:Cytoplasmic domain 2	UBXN4:CD 2	Q92575	23190	UBXN4	0.27836	0.0195826	0.299447
Biologically defined AD versus CN Core1–	seq.10638.1	10638-1	Protein	TERF1-interacting nuclear factor 2	TINF2	Q9BSI4	26277	TINF2	-0.276495	0.0195988	0.299447
Biologically defined AD versus CN Core1–	seq.20073.22	20073-22	Protein	GTPase KRas	K-ras	P01116	3845	KRAS	-0.22942	0.0197203	0.300673
Biologically defined AD versus CN Core1–	seq.12480.9	12480-9	Protein	OTU domain-containing protein 5	OTUD5	Q96G74	55593	OTUD5	0.260251	0.0198211	0.301578
Biologically defined AD versus CN Core1–	seq.6512.68	6512-68	Protein	Kremen protein 1	KREM1	Q96MU8	83999	KREMEN1	-0.270405	0.0198972	0.301743
Biologically defined AD versus CN Core1–	seq.17772.7	17772-7	Protein	Ubiquitin D	UBD	O15205	10537	UBD	0.296933	0.0199612	0.301743
Biologically defined AD versus CN Core1–	seq.4131.72	4131-72	Protein	Fibronectin	Fibronectin	P02751	2335	FN1	-0.201521	0.019982	0.301743
Biologically defined AD versus CN Core1–	seq.3360.50	3360-50	Protein	Serine/threonine-protein kinase Chk2	Chk2	O96017	11200	CHEK2	0.222742	0.0200164	0.301743
Biologically defined AD versus CN Core1–	seq.24960.48	24960-48	Protein	Huntingtin-interacting protein 1-related protein	HIP1R	O75146	9026	HIP1R	-0.240713	0.0200709	0.301743
Biologically defined AD versus CN Core1–	seq.7100.31	7100-31	Protein	T-cell surface antigen CD2	CD2	P06729	914	CD2	0.202637	0.0201237	0.301743
Biologically defined AD versus CN Core1–	seq.20106.80	20106-80	Protein	Scavenger mRNA-decapping enzyme DcpS	DCPS	Q96C86	28960	DCPS	-0.235845	0.0201585	0.301743
Biologically defined AD versus CN Core1–	seq.20245.13	20245-13	Protein	Retinoic acid receptor RXR-alpha	Retinoic acid receptor RXR-alpha	P19793	6256	RXRA	0.245766	0.0201632	0.301743
Biologically defined AD versus CN Core1–	seq.18303.39	18303-39	Protein	Neurogranin	NEUG	Q92686	4900	NRGN	-0.319828	0.0204339	0.303434
Biologically defined AD versus CN Core1–	seq.3079.62	3079-62	Protein	Retinoic acid receptor responder protein 2	TIG2	Q99969	5919	RARRES2	-0.196354	0.0204479	0.303434
Biologically defined AD versus CN Core1–	seq.11294.7	11294-7	Protein	Transmembrane and coiled-coil domains protein 3:region 2	TMCC3:region 2	Q9ULS5	57458	TMCC3	0.26249	0.0205583	0.303434
Biologically defined AD versus CN Core1–	seq.20561.15	20561-15	Protein	Contactin-6	CNTN6	Q9UQ52	27255	CNTN6	-0.214687	0.0206253	0.303434
Biologically defined AD versus CN Core1–	seq.10470.34	10470-34	Protein	Thioredoxin domain-containing protein 11:C-term	TXD11:N-term	Q6PKC3	51061	TXNDC11	0.205491	0.0206398	0.303434
Biologically defined AD versus CN Core1–	seq.2649.77	2649-77	Protein	Intercellular adhesion molecule 3	sICAM-3	P32942	3385	ICAM3	0.263024	0.0206822	0.303434
Biologically defined AD versus CN Core1–	seq.3197.70	3197-70	Protein	Insulin-degrading enzyme	IDE	P14735	3416	IDE	0.275356	0.0206905	0.303434
Biologically defined AD versus CN Core1–	seq.21164.83	21164-83	Protein	Homeobox protein TGIF2LX	TF2LX	Q8IUE1	90316	TGIF2LX	0.223997	0.0207558	0.303434
Biologically defined AD versus CN Core1–	seq.3580.25	3580-25	Protein	Alpha-1-antitrypsin	a1-Antitrypsin	P01009	5265	SERPINA1	0.21309	0.020785	0.303434
Biologically defined AD versus CN Core1–	seq.18938.3	18938-3	Protein	Very low-density lipoprotein receptor	VLDLR	P98155	7436	VLDLR	0.246039	0.0207992	0.303434
Biologically defined AD versus CN Core1–	seq.6448.36	6448-36	Protein	Semaphorin-3C	Sema E	Q99985	10512	SEMA3C	-0.226328	0.0208363	0.303434
Biologically defined AD versus CN Core1–	seq.6264.9	6264-9	Protein	Protein CYR61	CYR61	O00622	3491	CCN1	-0.240376	0.0208441	0.303434
Biologically defined AD versus CN Core1–	seq.17734.13	17734-13	Protein	Alpha-endosulfine	a-endosulfine	O43768	2029	ENSA	-0.771882	0.0208463	0.303434
Biologically defined AD versus CN Core1–	seq.12499.108	12499-108	Protein	Endophilin-A1	SH3G2	Q99962	6456	SH3GL2	-0.585842	0.020859	0.303434
Biologically defined AD versus CN Core1–	seq.9038.12	9038-12	Protein	Protein JTB	JTB	O76095	10899	JTB	0.273306	0.0209254	0.303794
Biologically defined AD versus CN Core1–	seq.18162.167	18162-167	Protein	Interleukin-1 receptor-associated kinase 4	IRAK4	Q9NWZ3	51135	IRAK4	0.479282	0.0210553	0.305064
Biologically defined AD versus CN Core1–	seq.8699.43	8699-43	Protein	Cysteine-rich motor neuron 1 protein:Cytoplasmic domain	CRIM1:CD	Q9NZV1	51232	CRIM1	0.223109	0.0210966	0.305064
Biologically defined AD versus CN Core1–	seq.7735.17	7735-17	Protein	Pigment epithelium-derived factor	PEDF	P36955	5176	SERPINF1	-0.193388	0.021324	0.306897
Biologically defined AD versus CN Core1–	seq.5494.52	5494-52	Protein	Small nuclear ribonucleoprotein F	RUXF	P62306	6636	SNRPF	-0.247447	0.0213713	0.306897
Biologically defined AD versus CN Core1–	seq.3291.30	3291-30	Protein	Low affinity immunoglobulin epsilon Fc receptor	CD23	P06734	2208	FCER2	-0.204956	0.0213715	0.306897
Biologically defined AD versus CN Core1–	seq.24211.25	24211-25	Protein	Hydroxymethylglutaryl-CoA lyase, mitochondrial	HMGCL	P35914	3155	HMGCL	-0.47362	0.0213919	0.306897
Biologically defined AD versus CN Core1–	seq.9887.40	9887-40	Protein	E3 ubiquitin-protein ligase RBBP6	RBBP6	Q7Z6E9	5930	RBBP6	0.231896	0.0215074	0.307405
Biologically defined AD versus CN Core1–	seq.2851.63	2851-63	Protein	C5a anaphylatoxin	C5a	P01031	727	C5	0.465265	0.0215853	0.307405
Biologically defined AD versus CN Core1–	seq.13741.36	13741-36	Protein	Insulin-like growth factor-binding protein 1	IGFBP-1	P08833	3484	IGFBP1	0.203861	0.0215862	0.307405
Biologically defined AD versus CN Core1–	seq.23176.17	23176-17	Protein	Beta-dystroglycan	Beta-dystroglycan	Q14118	1605	DAG1	-0.218404	0.021596	0.307405
Biologically defined AD versus CN Core1–	seq.12497.29	12497-29	Protein	Tudor-interacting repair regulator protein	SDOS	Q9BRJ7	84309	NUDT16L1	-0.387297	0.0216777	0.307967
Biologically defined AD versus CN Core1–	seq.20562.78	20562-78	Protein	Killer cell lectin-like receptor subfamily B member 1	KLRB1	Q12918	3820	KLRB1	0.246194	0.0217236	0.308019
Biologically defined AD versus CN Core1–	seq.10069.2	10069-2	Protein	Peptidyl-prolyl cis-trans isomerase NIMA-interacting 1	PIN1	Q13526	5300	PIN1	0.258479	0.0219386	0.309752
Biologically defined AD versus CN Core1–	seq.9110.2	9110-2	Protein	Synaptotagmin-17	SYT17	Q9BSW7	51760	SYT17	0.20349	0.0219699	0.309752
Biologically defined AD versus CN Core1–	seq.13007.66	13007-66	Protein	Epididymal-specific lipocalin-10	LCN10	Q6JVE6	414332	LCN10	0.252062	0.0220194	0.309752
Biologically defined AD versus CN Core1–	seq.20543.19	20543-19	Protein	Beta-defensin 127	DB127	Q9H1M4	140850	DEFB127	0.289434	0.0220896	0.309752
Biologically defined AD versus CN Core1–	seq.5132.71	5132-71	Protein	Interleukin-27 receptor subunit alpha	TCCR	Q6UWB1	9466	IL27RA	-0.211378	0.0220997	0.309752
Biologically defined AD versus CN Core1–	seq.20181.17	20181-17	Protein	Integrin alpha-11	ITA11	Q9UKX5	22801	ITGA11	0.220408	0.0221339	0.309752
Biologically defined AD versus CN Core1–	seq.8837.8	8837-8	Protein	Microfibrillar-associated protein 3-like	MFA3L	O75121	9848	MFAP3L	0.243233	0.0221792	0.309752
Biologically defined AD versus CN Core1–	seq.11571.75	11571-75	Protein	NKG2-E type II integral membrane protein:Isoform E, Extracellular domain	NKG2E:ECD	Q07444	3823	KLRC3	-0.242435	0.0221858	0.309752
Biologically defined AD versus CN Core1–	seq.4160.49	4160-49	Protein	72 kDa type IV collagenase	MMP-2	P08253	4313	MMP2	0.234481	0.0222764	0.310422
Biologically defined AD versus CN Core1–	seq.10010.10	10010-10	Protein	Beclin-1	BECN1	Q14457	8678	BECN1	0.294513	0.0223997	0.310809
Biologically defined AD versus CN Core1–	seq.10781.19	10781-19	Protein	C-type lectin domain family 4 member G	CLC4G	Q6UXB4	339390	CLEC4G	0.265049	0.0224203	0.310809
Biologically defined AD versus CN Core1–	seq.5275.28	5275-28	Protein	Proto-oncogene vav	VAV	P15498	7409	VAV1	0.564091	0.0225483	0.310809
Biologically defined AD versus CN Core1–	seq.8303.102	8303-102	Protein	UPF0160 protein MYG1, mitochondrial	MYG1	Q9HB07	60314	MYG1	0.3269	0.0226145	0.310809
Biologically defined AD versus CN Core1–	seq.5062.60	5062-60	Protein	CD226 antigen	CD226	Q15762	10666	CD226	0.278516	0.0226253	0.310809
Biologically defined AD versus CN Core1–	seq.2524.56	2524-56	Protein	High mobility group protein B1	HMG-1	P09429	3146	HMGB1	0.28606	0.0226739	0.310809
Biologically defined AD versus CN Core1–	seq.5122.92	5122-92	Protein	Semaphorin-6A	Semaphorin-6A	Q9H2E6	57556	SEMA6A	-0.21052	0.0226861	0.310809
Biologically defined AD versus CN Core1–	seq.14583.49	14583-49	Protein	Growth/differentiation factor 8	Myostatin	O14793	2660	MSTN	0.215947	0.0227296	0.310809
Biologically defined AD versus CN Core1–	seq.8366.19	8366-19	Protein	Uncharacterized protein C1orf115	CA115	Q9H7X2	79762	C1orf115	0.263643	0.0227524	0.310809
[truncated: 6,756 more rows]

## Sheet: ST-6
Supplementary Table 6: Differentially abundant proteins between clinically diagnosed AD dementia versus cognitively normal controls in different subgroups.
[truncated: 7,290 more rows]

[truncated: 21 more sheets: ST-7, ST-8, ST-9, ST-10, ST-11, ST-12, ST-13, ST-14, ST-15, ST-16, ST-17, ST-18, ST-19, ST-20, ST-21, ST-22, ST-23, ST-24, ST5 Suspicious Loci, ST7 Conditonal Analysis Compari …]
